# Supplementary material
Source: PubMed Central journal article supplement (PMC3411196)
Supplement: pr3000927_si_001.pdf [file pr3000927_si_001.pdf]

**Supplementary Information for:**

**Proteomic analysis of extracellular matrix from the hepatic stellate cell line LX-2 identifies CYR61 and Wnt-5a as novel constituents of fibrotic liver**

S. Tamir Rashid<sup>1,2,3\*†</sup>, Jonathan D. Humphries<sup>1,2\*</sup>, Adam Byron<sup>1,2</sup>, Ameet Dhar<sup>4</sup>, Janet A. Askari<sup>1,2</sup>, Julian N. Selley<sup>2</sup>, David Knight<sup>2</sup>, Robert D. Goldin<sup>4</sup>, Mark Thursz<sup>4</sup>, Martin J. Humphries<sup>1,2‡</sup>

<sup>1</sup>Wellcome Trust Centre for Cell-Matrix Research, <sup>2</sup>Faculty of Life Sciences, University of Manchester, Oxford Road, Manchester M13 9PT, UK.

<sup>3</sup>Department of Gastrointestinal Sciences, University of Manchester, Oxford Road, Manchester M13 9PT, UK.

<sup>4</sup>Department of Hepatology & Gastroenterology, St Mary's Hospital Campus, Imperial College London, London W2 1NY, UK.

\*These authors made equal contributions to this work.

†Current address: Laboratory for Regenerative Medicine, West Forvie Building, Robinson Way, University of Cambridge, Cambridge CB2 0SZ, UK.

‡To whom correspondence should be addressed. Email:

[martin.humphries@manchester.ac.uk](mailto:martin.humphries@manchester.ac.uk)

## **Contents:**

Methods

Figure S1. LX-2 flow cytometry

Figure S2. Replicate patient staining of fibulin 2, Wnt-5a and CYR61 in human fibrotic liver sections with negative control staining

Figure S3. Replicate animal staining of Wnt-5a and CYR61 in mouse fibrotic liver sections with negative control staining

Figure S4. Control staining of Wnt-5a and CYR61 in mouse fibrotic liver sections and normal liver sections

Table S1. Protein identifications for all biological repeats of LX-2 and HFF CDM purifications

Table S2. Peptides and spectra for all biological repeats of LX-2 and HFF CDM purifications

Table S3. GO analysis

Table S4. Quantification of identified proteins

Table S5. Hierarchical clustering analysis of proteins identified in LX-2 and HFF CDM purifications (full datasets).

Table S6. Statistical analysis of abundance changes of proteins identified in LX-2 and HFF CDM purifications.

## **Methods**

### **Flow cytometry**

Cells were either detached with trypsin EDTA or Hank's Balanced Salt Solution with Phenol Red without calcium and magnesium (Lonza Bioscience, Wokingham, UK) supplemented with EDTA. Cells were resuspended at  $0.5\text{--}1 \times 10^7$  cells/ml in phosphate-buffered saline (PBS; Lonza Bioscience, UK) containing 1% (v/v) FCS (PBS-FCS). Antibodies were added to a final concentration of 10–20  $\mu\text{g/ml}$  and incubated for 60 min on ice. Cells were washed with PBS-FCS, and anti-mouse IgG–FITC or anti-rat IgG–FITC conjugated antibodies were added at 1:200 dilution in PBS-FCS for 45 min on ice. Cells were then washed with PBS-FCS and fixed with 0.4% (v/v) formaldehyde in PBS. Cells were analysed with a Beckman Coulter Cyan ADP FACS machine (Beckman Coulter Limited, High Wycombe, UK).

## Figure S1 LX-2 flow cytometry

Flow cytometry was performed with a panel of anti-integrin antibodies and the LX-2 cell line. The x-axis denotes fluorescence intensity and the y-axis shows cell count. Green lines are for the indicated antibodies (clone name) and black lines are for appropriate species specific negative controls.

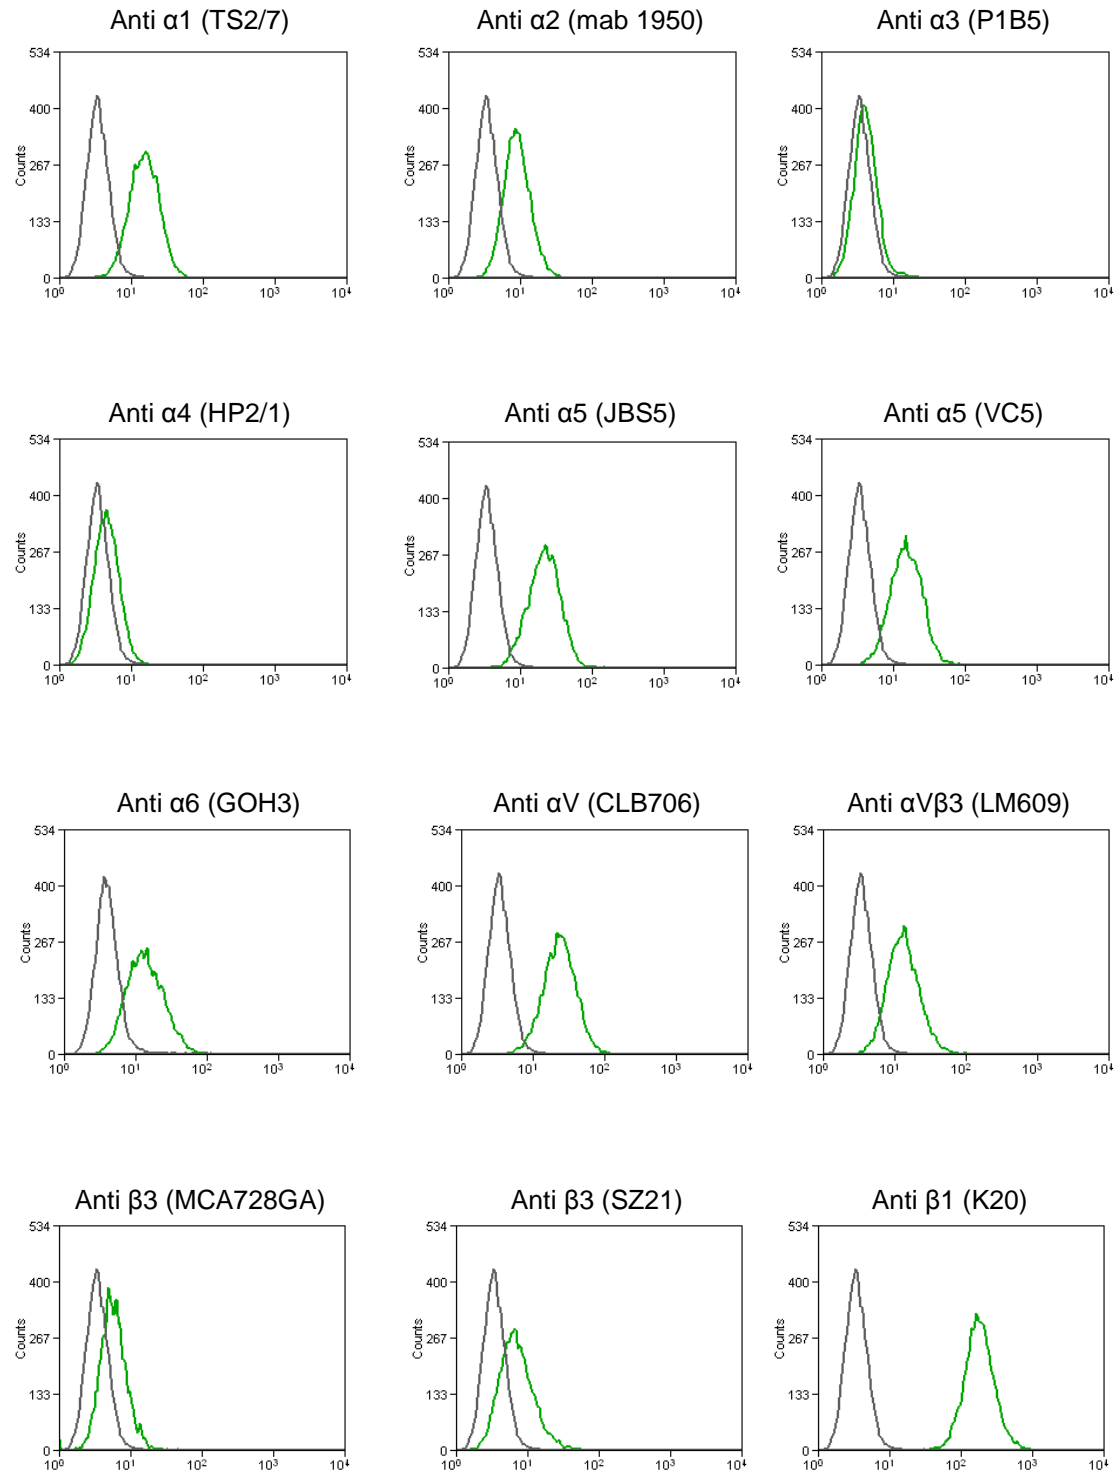

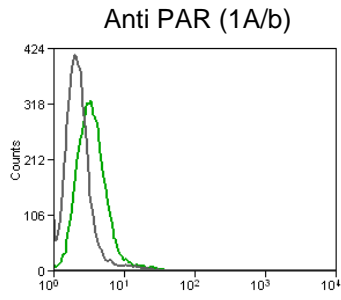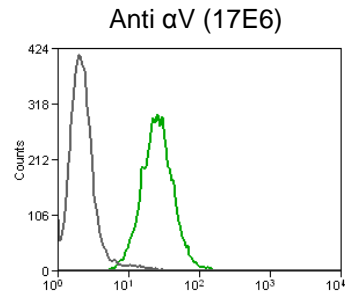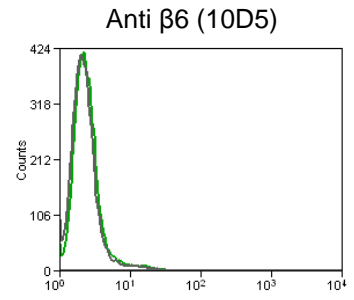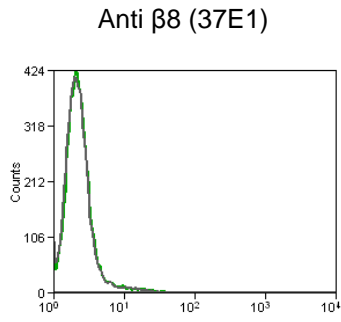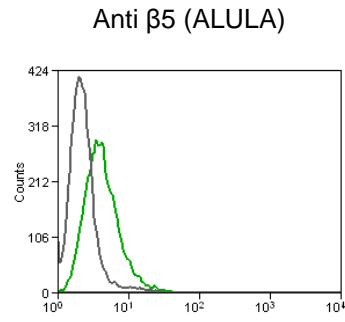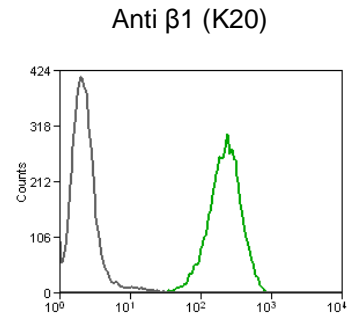

Figure S2. Replicate patient staining of fibulin 2, Wnt-5a and CYR61 in human fibrotic liver sections with negative control staining.

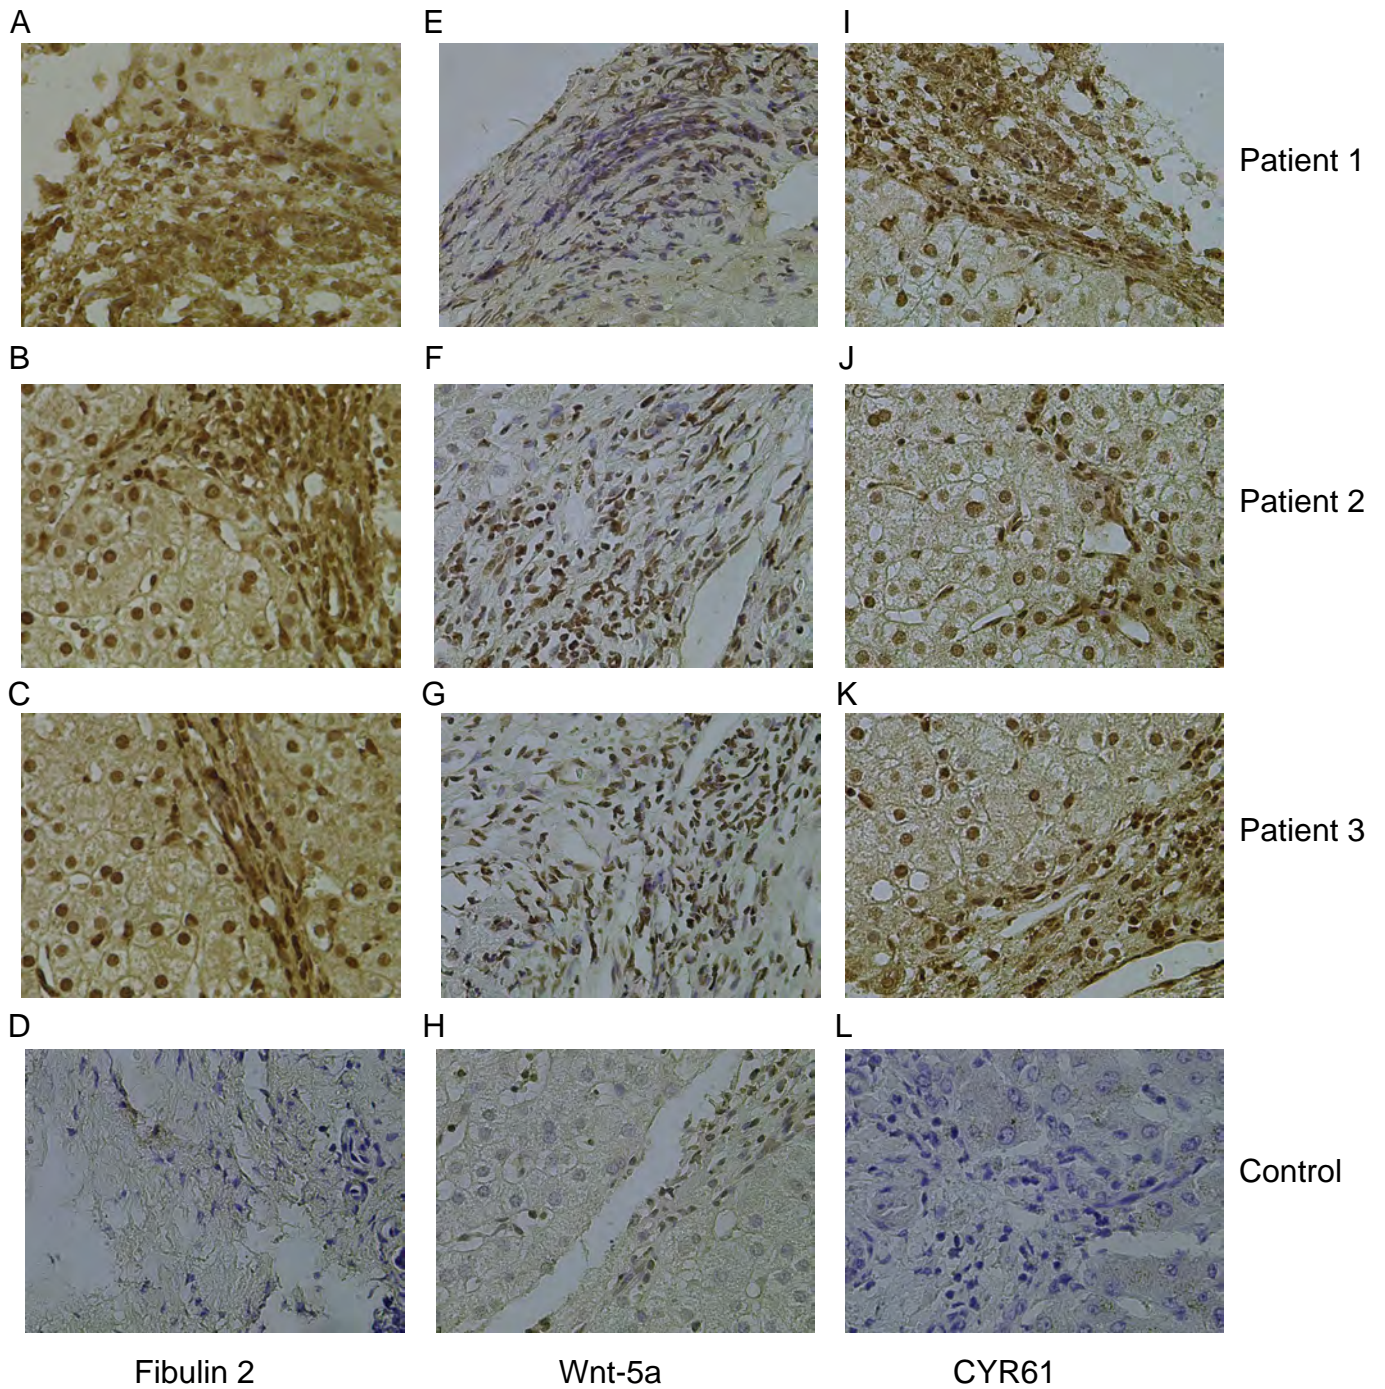

Figure S2. A–L, representative images of histological sections from three different patients demonstrating immunohistochemical staining in human hepatitis C virus-induced liver fibrosis. Fibulin-2 staining (A, B and C) was observed within fibrotic areas. Wnt-5a (E, F and G) and CYR61 (I, J and K) staining was localised to fibrotic septa in human liver tissue. Sections displayed are from three different individual patients. Control (D, H and L) indicates section stained with the omission of the primary antibody. Images were acquired at 400x magnification.

Figure S3. Replicate animal staining of Wnt-5a and CYR61 in mouse fibrotic liver sections with negative control staining.

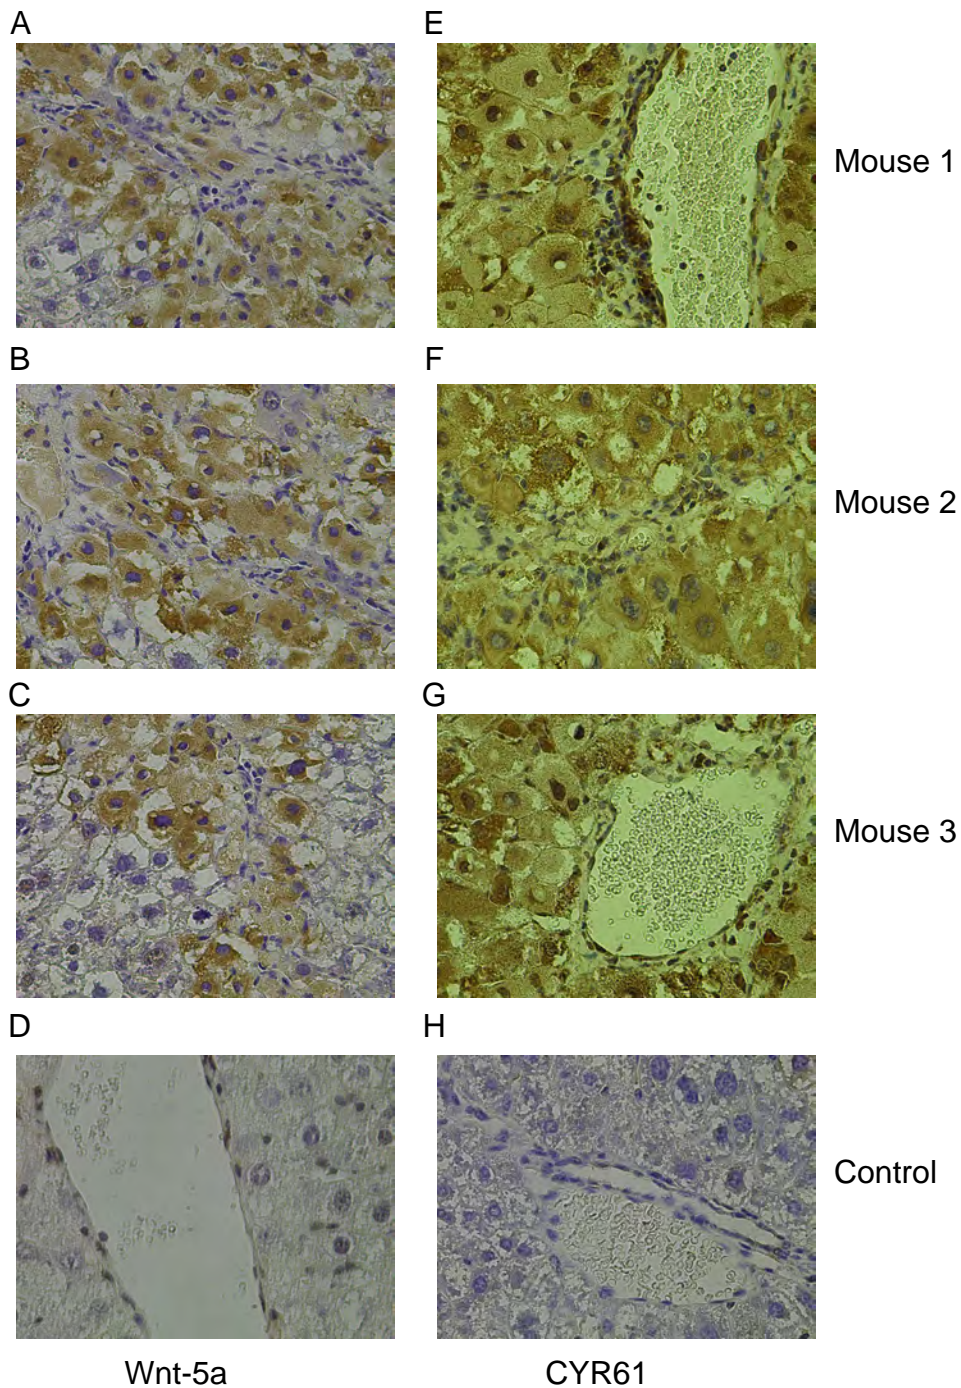

Figure S3. A–H, representative images of histological sections from three different animals demonstrating immunohistochemical staining in murine CCl4-induced liver fibrosis. Wnt-5a (A, B and C) and CYR61 (E, F and G) both heavily stained peri-fibrotic areas in murine liver tissue. Sections displayed are from three different individual animals. Control (D and H) indicates section stained with the omission of the primary antibody. Images were acquired at 400× magnification.

**Figure S4. Control staining of Wnt-5a and CYR61 in mouse fibrotic liver sections and normal liver sections.**

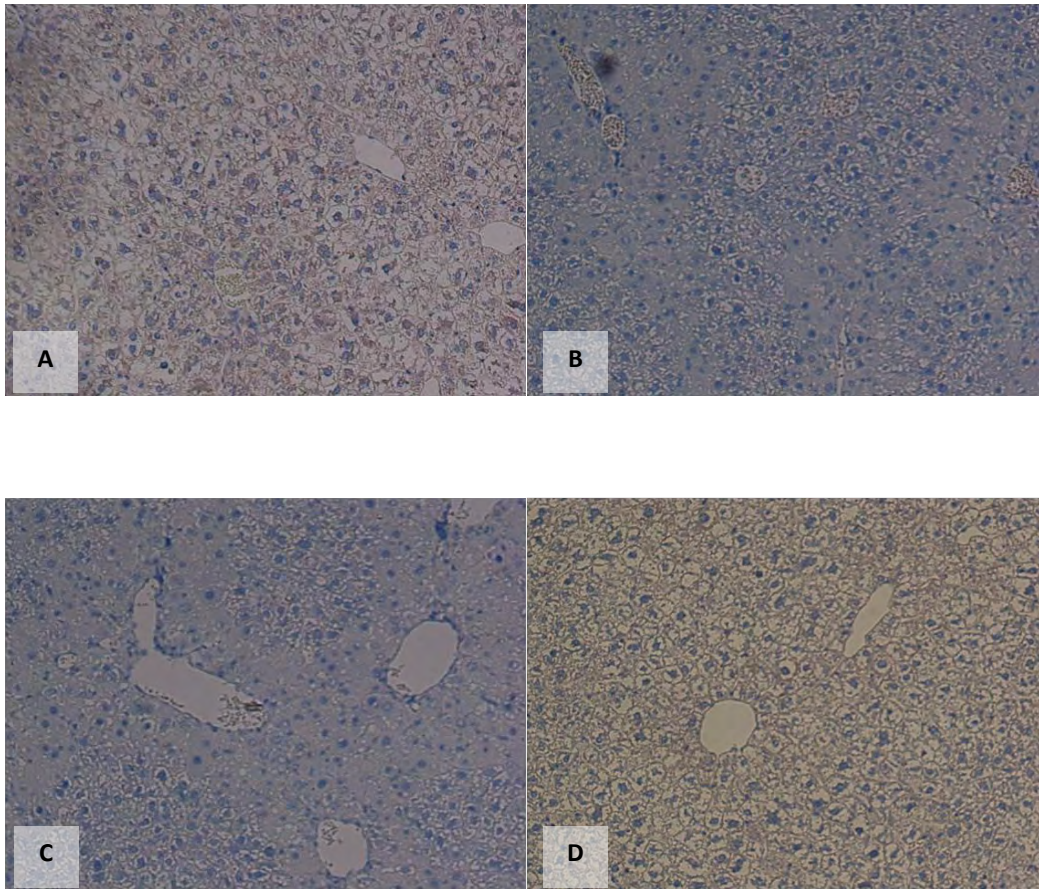

**A:** Incubation of fibrotic murine liver tissue without the antibody to CYR61(negative control) x10 objective.

**B:** Incubation of normal murine tissue with CYR61 x10 objective.

**C:** Incubation of fibrotic murine liver tissue without the antibody to WNT5a (negative control) x10 objective.

**D:** Incubation of normal murine tissue with WNT5a x10 objective.

Liver sections from three mice treated with CCL4 to induce liver fibrosis were stained for both CYR61 and WNT5a, using the techniques detailed in the methods section. Negative control tissue, in which the primary antibody was omitted, did not stain positively (see panels A and C) and normal murine liver tissue did not stain positively for either CYR61 (see panel 1B) or WNT5a (panel 1D).



**Table S1. Protein identifications for all biological repeats of LK-2 and HF1 CDM purification**  
Threshold criteria for peptides: 80.0% minimum  
Threshold criteria for proteins: 99.0% minimum and 2 peptides minimum

| Biological sample category | Gene symbol and protein name                                                                                                                                                                                                                                                                                                                                                                                                                                                                                                                                                                                                                                                                                                                                                                                                                                                                                                                                                                                                                                                                                                                                                                  | Protein accession numbers                                                                                                                                 | Protein molecular weight (Da) | Protein identification probability | Number of unique peptides | Number of unique spectra | Number of total spectra | Percentage sequence coverage |
|----------------------------|-----------------------------------------------------------------------------------------------------------------------------------------------------------------------------------------------------------------------------------------------------------------------------------------------------------------------------------------------------------------------------------------------------------------------------------------------------------------------------------------------------------------------------------------------------------------------------------------------------------------------------------------------------------------------------------------------------------------------------------------------------------------------------------------------------------------------------------------------------------------------------------------------------------------------------------------------------------------------------------------------------------------------------------------------------------------------------------------------------------------------------------------------------------------------------------------------|-----------------------------------------------------------------------------------------------------------------------------------------------------------|-------------------------------|------------------------------------|---------------------------|--------------------------|-------------------------|------------------------------|
| LK-2 Repeat 1              | ATAD3A ATPase family, AAA domain containing 3A                                                                                                                                                                                                                                                                                                                                                                                                                                                                                                                                                                                                                                                                                                                                                                                                                                                                                                                                                                                                                                                                                                                                                | IP0025992,IP00345433,IP00646144                                                                                                                           | 64,338.10                     | 99.80%                             | 2                         | 2                        | 3                       | 4.37%                        |
| LK-2 Repeat 1              | HFPC2 Helicase with strand specific heparan sulfate proteoglycan core protein                                                                                                                                                                                                                                                                                                                                                                                                                                                                                                                                                                                                                                                                                                                                                                                                                                                                                                                                                                                                                                                                                                                 | IP00004266                                                                                                                                                | 464,126.00                    | 100.00%                            | 3                         | 3                        | 4                       | 15.00%                       |
| LK-2 Repeat 1              | HA2-ABAI1 Hemoglobin subunit alpha                                                                                                                                                                                                                                                                                                                                                                                                                                                                                                                                                                                                                                                                                                                                                                                                                                                                                                                                                                                                                                                                                                                                                            | IP0041071,IP00833088                                                                                                                                      | 15,262.60                     | 99.80%                             | 2                         | 2                        | 4                       | 16.90%                       |
| LK-2 Repeat 1              | HADHA Hydroxylated enzyme subunit alpha, mitochondrial precursor                                                                                                                                                                                                                                                                                                                                                                                                                                                                                                                                                                                                                                                                                                                                                                                                                                                                                                                                                                                                                                                                                                                              | IP00051522                                                                                                                                                | 62,968.90                     | 100.00%                            | 11                        | 11                       | 11                      | 19.00%                       |
| LK-2 Repeat 1              | CAZDA1 Factor 1, cytosolic precursor                                                                                                                                                                                                                                                                                                                                                                                                                                                                                                                                                                                                                                                                                                                                                                                                                                                                                                                                                                                                                                                                                                                                                          | IP00007999                                                                                                                                                | 15,905.10                     | 100.00%                            | 3                         | 3                        | 3                       | 6.83%                        |
| LK-2 Repeat 1              | TM6SF1 TM6SF1, type 1 of Tubulin-interstitial nephritis antigen like precursor                                                                                                                                                                                                                                                                                                                                                                                                                                                                                                                                                                                                                                                                                                                                                                                                                                                                                                                                                                                                                                                                                                                | IP00005563                                                                                                                                                | 32,890.00                     | 100.00%                            | 3                         | 3                        | 6                       | 15.40%                       |
| LK-2 Repeat 1              | COL5A2 Collagen type 2, Collagen alpha 1(VI) chain precursor                                                                                                                                                                                                                                                                                                                                                                                                                                                                                                                                                                                                                                                                                                                                                                                                                                                                                                                                                                                                                                                                                                                                  | IP00048482                                                                                                                                                | 105,382.80                    | 100.00%                            | 4                         | 4                        | 4                       | 26.90%                       |
| LK-2 Repeat 1              | THY1 Thy 1 membrane glycoprotein precursor                                                                                                                                                                                                                                                                                                                                                                                                                                                                                                                                                                                                                                                                                                                                                                                                                                                                                                                                                                                                                                                                                                                                                    | IP00022892,IP00555577                                                                                                                                     | 15,885.70                     | 100.00%                            | 3                         | 3                        | 4                       | 7.67%                        |
| LK-2 Repeat 1              | KRT18 Keratin, type I cytokeratin 18                                                                                                                                                                                                                                                                                                                                                                                                                                                                                                                                                                                                                                                                                                                                                                                                                                                                                                                                                                                                                                                                                                                                                          | IP00054788,IP00784347                                                                                                                                     | 48,041.00                     | 100.00%                            | 9                         | 9                        | 10                      | 5.82%                        |
| LK-2 Repeat 1              | AGRN Arinr precursor                                                                                                                                                                                                                                                                                                                                                                                                                                                                                                                                                                                                                                                                                                                                                                                                                                                                                                                                                                                                                                                                                                                                                                          | IP00014643                                                                                                                                                | 214,420.00                    | 100.00%                            | 3                         | 3                        | 4                       | 19.60%                       |
| LK-2 Repeat 1              | YWHAE1.3 Y1.3 protein zeta/delta                                                                                                                                                                                                                                                                                                                                                                                                                                                                                                                                                                                                                                                                                                                                                                                                                                                                                                                                                                                                                                                                                                                                                              | IP00021243                                                                                                                                                | 19,066.60                     | 99.80%                             | 2                         | 2                        | 1                       | 5.40%                        |
| LK-2 Repeat 1              | CFNE1 Caprin-1                                                                                                                                                                                                                                                                                                                                                                                                                                                                                                                                                                                                                                                                                                                                                                                                                                                                                                                                                                                                                                                                                                                                                                                | IP00018432                                                                                                                                                | 50,167.40                     | 100.00%                            | 8                         | 9                        | 28                      | 21.90%                       |
| LK-2 Repeat 1              | EFA1A Elation factor 1, alpha 1                                                                                                                                                                                                                                                                                                                                                                                                                                                                                                                                                                                                                                                                                                                                                                                                                                                                                                                                                                                                                                                                                                                                                               | IP00019448,IP00472724                                                                                                                                     | 11,529.20                     | 99.80%                             | 3                         | 3                        | 6                       | 27.30%                       |
| LK-2 Repeat 1              | ARPC3 Actin-related protein 2/3 complex subunit 3                                                                                                                                                                                                                                                                                                                                                                                                                                                                                                                                                                                                                                                                                                                                                                                                                                                                                                                                                                                                                                                                                                                                             | IP00009022                                                                                                                                                | 35,957.90                     | 99.80%                             | 2                         | 2                        | 2                       | 2.73%                        |
| LK-2 Repeat 1              | LCAM2 Laminin subunit beta 2 precursor                                                                                                                                                                                                                                                                                                                                                                                                                                                                                                                                                                                                                                                                                                                                                                                                                                                                                                                                                                                                                                                                                                                                                        | IP00015642,IP00796102                                                                                                                                     | 17,389.90                     | 99.80%                             | 2                         | 2                        | 2                       | 3.82%                        |
| LK-2 Repeat 1              | BCAM Lutheran blood group glycoprotein precursor                                                                                                                                                                                                                                                                                                                                                                                                                                                                                                                                                                                                                                                                                                                                                                                                                                                                                                                                                                                                                                                                                                                                              | IP00020406,IP00554618,IP00794214                                                                                                                          | 67,880.90                     | 99.80%                             | 2                         | 2                        | 2                       | 3.82%                        |
| LK-2 Repeat 1              | LMNA Lamin A/Lamin A/C                                                                                                                                                                                                                                                                                                                                                                                                                                                                                                                                                                                                                                                                                                                                                                                                                                                                                                                                                                                                                                                                                                                                                                        | IP00021405,IP00216621,IP00216951,IP00514204,IP00644807,IP00655812                                                                                         | 55,616.60                     | 100.00%                            | 4                         | 4                        | 5                       | 8.83%                        |
| LK-2 Repeat 1              | H2AFV Histone H2AV                                                                                                                                                                                                                                                                                                                                                                                                                                                                                                                                                                                                                                                                                                                                                                                                                                                                                                                                                                                                                                                                                                                                                                            | IP00018278,IP00218448,IP00505841                                                                                                                          | 15,470.10                     | 99.80%                             | 2                         | 2                        | 5                       | 22.00%                       |
| LK-2 Repeat 1              | GARDH Glyoxylate-3-phosphate dehydrogenase                                                                                                                                                                                                                                                                                                                                                                                                                                                                                                                                                                                                                                                                                                                                                                                                                                                                                                                                                                                                                                                                                                                                                    | IP00219018,IP00799257                                                                                                                                     | 31,530.00                     | 100.00%                            | 4                         | 4                        | 5                       | 21.80%                       |
| LK-2 Repeat 1              | FBI2 FBI2, 2 precursor                                                                                                                                                                                                                                                                                                                                                                                                                                                                                                                                                                                                                                                                                                                                                                                                                                                                                                                                                                                                                                                                                                                                                                        | IP00019439,IP00784511                                                                                                                                     | 314,713.50                    | 99.80%                             | 2                         | 2                        | 2                       | 2.73%                        |
| LK-2 Repeat 1              | LAMC2 Laminin subunit gamma-1 precursor                                                                                                                                                                                                                                                                                                                                                                                                                                                                                                                                                                                                                                                                                                                                                                                                                                                                                                                                                                                                                                                                                                                                                       | IP00219281                                                                                                                                                | 17,587.10                     | 100.00%                            | 4                         | 4                        | 4                       | 3.54%                        |
| LK-2 Repeat 1              | RP53A 80S ribosomal protein 53a                                                                                                                                                                                                                                                                                                                                                                                                                                                                                                                                                                                                                                                                                                                                                                                                                                                                                                                                                                                                                                                                                                                                                               | IP00019462                                                                                                                                                | 29,693.50                     | 99.80%                             | 2                         | 2                        | 2                       | 6.61%                        |
| LK-2 Repeat 1              | H2AFY Histone H2AF                                                                                                                                                                                                                                                                                                                                                                                                                                                                                                                                                                                                                                                                                                                                                                                                                                                                                                                                                                                                                                                                                                                                                                            | IP00018219                                                                                                                                                | 74,664.90                     | 100.00%                            | 24                        | 27                       | 57                      | 49.30%                       |
| LK-2 Repeat 1              | TGFB1 Transforming growth factor beta-inducible protein in h3 overcurator                                                                                                                                                                                                                                                                                                                                                                                                                                                                                                                                                                                                                                                                                                                                                                                                                                                                                                                                                                                                                                                                                                                     | IP00008964                                                                                                                                                | 25,214.00                     | 100.00%                            | 3                         | 3                        | 8                       | 18.90%                       |
| LK-2 Repeat 1              | RAF1B Ras-related protein Raf-1B                                                                                                                                                                                                                                                                                                                                                                                                                                                                                                                                                                                                                                                                                                                                                                                                                                                                                                                                                                                                                                                                                                                                                              | IP00007990,IP00481496                                                                                                                                     | 65,209.10                     | 99.80%                             | 2                         | 2                        | 3                       | 2.84%                        |
| LK-2 Repeat 1              | HEST1H8 Helicase H28 type 1 L                                                                                                                                                                                                                                                                                                                                                                                                                                                                                                                                                                                                                                                                                                                                                                                                                                                                                                                                                                                                                                                                                                                                                                 | IP00018351,IP00209101,IP001512906,IP00303131,IP00321665,IP00419833,IP00744955,IP0054798,IP00744661,IP00816252                                             | 13,971.70                     | 100.00%                            | 5                         | 6                        | 76                      | 38.10%                       |
| LK-2 Repeat 1              | RP58 80S ribosomal protein 58                                                                                                                                                                                                                                                                                                                                                                                                                                                                                                                                                                                                                                                                                                                                                                                                                                                                                                                                                                                                                                                                                                                                                                 | IP00018465                                                                                                                                                | 21,460.70                     | 100.00%                            | 5                         | 6                        | 9                       | 34.00%                       |
| LK-2 Repeat 1              | PCBP2 poly(rC) binding protein 2 isoform a                                                                                                                                                                                                                                                                                                                                                                                                                                                                                                                                                                                                                                                                                                                                                                                                                                                                                                                                                                                                                                                                                                                                                    | IP00012060,IP00216689,IP00410500,IP00796317                                                                                                               | 38,634.00                     | 99.80%                             | 2                         | 2                        | 2                       | 6.56%                        |
| LK-2 Repeat 1              | TMEM44 Transmembrane protein 43                                                                                                                                                                                                                                                                                                                                                                                                                                                                                                                                                                                                                                                                                                                                                                                                                                                                                                                                                                                                                                                                                                                                                               | IP00011280                                                                                                                                                | 44,859.80                     | 100.00%                            | 12                        | 13                       | 15                      | 38.20%                       |
| LK-2 Repeat 1              | VDAC1 Voltage-dependent anion-selective channel protein 1                                                                                                                                                                                                                                                                                                                                                                                                                                                                                                                                                                                                                                                                                                                                                                                                                                                                                                                                                                                                                                                                                                                                     | IP00214308                                                                                                                                                | 33,795.90                     | 100.00%                            | 12                        | 13                       | 38                      | 64.30%                       |
| LK-2 Repeat 1              | VDAC2 Voltage-dependent anion-selective channel protein 2                                                                                                                                                                                                                                                                                                                                                                                                                                                                                                                                                                                                                                                                                                                                                                                                                                                                                                                                                                                                                                                                                                                                     | IP00024149,IP00216624,IP00216623,IP00455311,IP0085174J,IP008585973                                                                                        | 36,214.30                     | 100.00%                            | 7                         | 7                        | 16                      | 29.90%                       |
| LK-2 Repeat 1              | ERL2N2 Isoform 1 of ERL-2 precursor                                                                                                                                                                                                                                                                                                                                                                                                                                                                                                                                                                                                                                                                                                                                                                                                                                                                                                                                                                                                                                                                                                                                                           | IP00019424                                                                                                                                                | 17,822.40                     | 100.00%                            | 2                         | 2                        | 4                       | 31.80%                       |
| LK-2 Repeat 1              | PRSS23 Serine protease 23 precursor                                                                                                                                                                                                                                                                                                                                                                                                                                                                                                                                                                                                                                                                                                                                                                                                                                                                                                                                                                                                                                                                                                                                                           | IP00020941                                                                                                                                                | 42,994.40                     | 100.00%                            | 5                         | 5                        | 13                      | 17.20%                       |
| LK-2 Repeat 1              | HSP90A1 Hsp 90 class A protein                                                                                                                                                                                                                                                                                                                                                                                                                                                                                                                                                                                                                                                                                                                                                                                                                                                                                                                                                                                                                                                                                                                                                                | IP00314775,IP00414676                                                                                                                                     | 84,740.40                     | 100.00%                            | 3                         | 3                        | 4                       | 5.71%                        |
| LK-2 Repeat 1              | BAAF1 Barrier to autophagy factor 1                                                                                                                                                                                                                                                                                                                                                                                                                                                                                                                                                                                                                                                                                                                                                                                                                                                                                                                                                                                                                                                                                                                                                           | IP00001607                                                                                                                                                | 103,000.00                    | 100.00%                            | 2                         | 2                        | 15                      | 62.90%                       |
| LK-2 Repeat 1              | SURF4 Isoform 1 of Surf1/locus protein 4                                                                                                                                                                                                                                                                                                                                                                                                                                                                                                                                                                                                                                                                                                                                                                                                                                                                                                                                                                                                                                                                                                                                                      | IP00007937,IP00399142,IP00641719                                                                                                                          | 21,118.80                     | 99.80%                             | 2                         | 2                        | 2                       | 16.70%                       |
| LK-2 Repeat 1              | PLN1 Phospholamban type 1 precursor                                                                                                                                                                                                                                                                                                                                                                                                                                                                                                                                                                                                                                                                                                                                                                                                                                                                                                                                                                                                                                                                                                                                                           | IP00014283                                                                                                                                                | 25,566.40                     | 100.00%                            | 3                         | 3                        | 17                      | 25.80%                       |
| LK-2 Repeat 1              | FGF2 Fibroblast growth factor 2                                                                                                                                                                                                                                                                                                                                                                                                                                                                                                                                                                                                                                                                                                                                                                                                                                                                                                                                                                                                                                                                                                                                                               | IP00015460                                                                                                                                                | 30,752.70                     | 99.80%                             | 2                         | 2                        | 2                       | 6.94%                        |
| LK-2 Repeat 1              | NID1 Niemann-Pick 1                                                                                                                                                                                                                                                                                                                                                                                                                                                                                                                                                                                                                                                                                                                                                                                                                                                                                                                                                                                                                                                                                                                                                                           | IP00028908,IP00239303                                                                                                                                     | 107,122.60                    | 100.00%                            | 9                         | 10                       | 13                      | 14.30%                       |
| LK-2 Repeat 1              | RP115 80S ribosomal protein L15                                                                                                                                                                                                                                                                                                                                                                                                                                                                                                                                                                                                                                                                                                                                                                                                                                                                                                                                                                                                                                                                                                                                                               | IP00417628,IP00500832                                                                                                                                     | 24,159.50                     | 100.00%                            | 3                         | 3                        | 11                      | 24.00%                       |
| LK-2 Repeat 1              | RP57 80S ribosomal protein 57                                                                                                                                                                                                                                                                                                                                                                                                                                                                                                                                                                                                                                                                                                                                                                                                                                                                                                                                                                                                                                                                                                                                                                 | IP00013415                                                                                                                                                | 21,109.50                     | 100.00%                            | 3                         | 3                        | 8                       | 21.60%                       |
| LK-2 Repeat 1              | ANKK1 Anknk-1                                                                                                                                                                                                                                                                                                                                                                                                                                                                                                                                                                                                                                                                                                                                                                                                                                                                                                                                                                                                                                                                                                                                                                                 | IP00218918,IP00586413                                                                                                                                     | 22,720.00                     | 100.00%                            | 2                         | 2                        | 2                       | 12.70%                       |
| LK-2 Repeat 1              | RP13A 60S ribosomal protein L13a                                                                                                                                                                                                                                                                                                                                                                                                                                                                                                                                                                                                                                                                                                                                                                                                                                                                                                                                                                                                                                                                                                                                                              | IP00304612,IP00398964,IP00746448                                                                                                                          | 23,340.30                     | 99.80%                             | 2                         | 2                        | 3                       | 8.78%                        |
| LK-2 Repeat 1              | ABO3 A/BH binding cassette sub-family D member 3                                                                                                                                                                                                                                                                                                                                                                                                                                                                                                                                                                                                                                                                                                                                                                                                                                                                                                                                                                                                                                                                                                                                              | IP00000372                                                                                                                                                | 75,462.20                     | 100.00%                            | 3                         | 3                        | 11                      | 5.77%                        |
| LK-2 Repeat 1              | EGF1 EGF-like domain-containing protein 7 precursor                                                                                                                                                                                                                                                                                                                                                                                                                                                                                                                                                                                                                                                                                                                                                                                                                                                                                                                                                                                                                                                                                                                                           | IP00018906                                                                                                                                                | 68,599.80                     | 100.00%                            | 8                         | 9                        | 16                      | 16.50%                       |
| LK-2 Repeat 1              | TOMM34 Isoform 1 of Probable mitochondrial import receptor subunit TOM40 homolog                                                                                                                                                                                                                                                                                                                                                                                                                                                                                                                                                                                                                                                                                                                                                                                                                                                                                                                                                                                                                                                                                                              | IP00014033                                                                                                                                                | 37,875.10                     | 100.00%                            | 3                         | 3                        | 5                       | 10.80%                       |
| LK-2 Repeat 1              | SULCSA1 Sulfocysteine sulfoxide translocase 2                                                                                                                                                                                                                                                                                                                                                                                                                                                                                                                                                                                                                                                                                                                                                                                                                                                                                                                                                                                                                                                                                                                                                 | IP00007180                                                                                                                                                | 33,287.50                     | 100.00%                            | 2                         | 2                        | 4                       | 10.50%                       |
| LK-2 Repeat 1              | FLNA Filamin A                                                                                                                                                                                                                                                                                                                                                                                                                                                                                                                                                                                                                                                                                                                                                                                                                                                                                                                                                                                                                                                                                                                                                                                | IP00032592,IP00333541,IP00604676                                                                                                                          | 276,523.10                    | 99.80%                             | 2                         | 2                        | 10                      | 0.84%                        |
| LK-2 Repeat 1              | YHAE4 Y1.4-3 protein isoform                                                                                                                                                                                                                                                                                                                                                                                                                                                                                                                                                                                                                                                                                                                                                                                                                                                                                                                                                                                                                                                                                                                                                                  | IP00000816                                                                                                                                                | 19,577.00                     | 100.00%                            | 5                         | 5                        | 7                       | 19.20%                       |
| LK-2 Repeat 1              | TKC1 TKC1, type 1 of Transducin precursor                                                                                                                                                                                                                                                                                                                                                                                                                                                                                                                                                                                                                                                                                                                                                                                                                                                                                                                                                                                                                                                                                                                                                     | IP00011008                                                                                                                                                | 26,946.80                     | 100.00%                            | 2                         | 2                        | 7                       | 17.20%                       |
| LK-2 Repeat 1              | SARMSD Sorting and assembly machinery component 50 homolog                                                                                                                                                                                                                                                                                                                                                                                                                                                                                                                                                                                                                                                                                                                                                                                                                                                                                                                                                                                                                                                                                                                                    | IP00412713                                                                                                                                                | 31,959.50                     | 100.00%                            | 3                         | 3                        | 7                       | 8.74%                        |
| LK-2 Repeat 1              | RP12A 80S ribosomal protein L2A                                                                                                                                                                                                                                                                                                                                                                                                                                                                                                                                                                                                                                                                                                                                                                                                                                                                                                                                                                                                                                                                                                                                                               | IP00038133,IP00397934,IP00793966                                                                                                                          | 18,336.30                     | 100.00%                            | 3                         | 3                        | 6                       | 17.80%                       |
| LK-2 Repeat 1              | LAMB1 Laminin subunit beta-1                                                                                                                                                                                                                                                                                                                                                                                                                                                                                                                                                                                                                                                                                                                                                                                                                                                                                                                                                                                                                                                                                                                                                                  | IP00013976,IP00851454                                                                                                                                     | 200,487.00                    | 100.00%                            | 4                         | 4                        | 13                      | 4.03%                        |
| LK-2 Repeat 1              | ANKAS Anknk-5                                                                                                                                                                                                                                                                                                                                                                                                                                                                                                                                                                                                                                                                                                                                                                                                                                                                                                                                                                                                                                                                                                                                                                                 | IP00021800                                                                                                                                                | 35,920.60                     | 100.00%                            | 4                         | 4                        | 6                       | 16.60%                       |
| LK-2 Repeat 1              | KRT2 Keratin, type I cytokeratin 2, epidermal                                                                                                                                                                                                                                                                                                                                                                                                                                                                                                                                                                                                                                                                                                                                                                                                                                                                                                                                                                                                                                                                                                                                                 | IP00021304                                                                                                                                                | 45,848.40                     | 100.00%                            | 9                         | 9                        | 18                      | 17.00%                       |
| LK-2 Repeat 1              | RP53 80S ribosomal protein 53                                                                                                                                                                                                                                                                                                                                                                                                                                                                                                                                                                                                                                                                                                                                                                                                                                                                                                                                                                                                                                                                                                                                                                 | IP00021089                                                                                                                                                | 17,205.30                     | 100.00%                            | 4                         | 4                        | 7                       | 12.50%                       |
| LK-2 Repeat 1              | RP52 80S ribosomal protein 52                                                                                                                                                                                                                                                                                                                                                                                                                                                                                                                                                                                                                                                                                                                                                                                                                                                                                                                                                                                                                                                                                                                                                                 | IP00021088                                                                                                                                                | 22,274.50                     | 100.00%                            | 4                         | 4                        | 7                       | 18.18%                       |
| LK-2 Repeat 1              | RP12B 80S ribosomal protein L2B                                                                                                                                                                                                                                                                                                                                                                                                                                                                                                                                                                                                                                                                                                                                                                                                                                                                                                                                                                                                                                                                                                                                                               | IP00005151,IP003242805,IP00795408                                                                                                                         | 14,911.90                     | 100.00%                            | 3                         | 3                        | 4                       | 3.08%                        |
| LK-2 Repeat 1              | EFA1A Elation factor 1, alpha 1                                                                                                                                                                                                                                                                                                                                                                                                                                                                                                                                                                                                                                                                                                                                                                                                                                                                                                                                                                                                                                                                                                                                                               | IP00029012                                                                                                                                                | 16,556.50                     | 99.80%                             | 2                         | 2                        | 2                       | 0.37%                        |
| LK-2 Repeat 1              | ATPB ATP synthase subunit beta, mitochondrial precursor                                                                                                                                                                                                                                                                                                                                                                                                                                                                                                                                                                                                                                                                                                                                                                                                                                                                                                                                                                                                                                                                                                                                       | IP00031870                                                                                                                                                | 61,472.00                     | 99.80%                             | 2                         | 2                        | 8                       | 8.22%                        |
| LK-2 Repeat 1              | RP516 80S ribosomal protein 516                                                                                                                                                                                                                                                                                                                                                                                                                                                                                                                                                                                                                                                                                                                                                                                                                                                                                                                                                                                                                                                                                                                                                               | IP00021093                                                                                                                                                | 60,622.80                     | 99.80%                             | 2                         | 2                        | 3                       | 3.15%                        |
| LK-2 Repeat 1              | GSN Gelsolin                                                                                                                                                                                                                                                                                                                                                                                                                                                                                                                                                                                                                                                                                                                                                                                                                                                                                                                                                                                                                                                                                                                                                                                  | IP00002419,IP00646773                                                                                                                                     | 66,001.20                     | 100.00%                            | 17                        | 17                       | 104                     | 28.70%                       |
| LK-2 Repeat 1              | KRT1 Keratin, type I cytokeratin 1                                                                                                                                                                                                                                                                                                                                                                                                                                                                                                                                                                                                                                                                                                                                                                                                                                                                                                                                                                                                                                                                                                                                                            | IP00023937                                                                                                                                                | 66,001.20                     | 100.00%                            | 2                         | 2                        | 4                       | 0.37%                        |
| LK-2 Repeat 1              | CD44 Isoform 1 of CD44 antigen precursor                                                                                                                                                                                                                                                                                                                                                                                                                                                                                                                                                                                                                                                                                                                                                                                                                                                                                                                                                                                                                                                                                                                                                      | IP00291760,IP00305604,IP00418465,IP00419129,IP00827650,IP00827658,IP00827795,IP00827893,IP00827937,IP00827982,IP00828056,IP00828064,IP00828111,IP00828192 | 79,526.00                     | 100.00%                            | 3                         | 3                        | 4                       | 5.07%                        |
| LK-2 Repeat 1              | NTS1 Nucleolin precursor                                                                                                                                                                                                                                                                                                                                                                                                                                                                                                                                                                                                                                                                                                                                                                                                                                                                                                                                                                                                                                                                                                                                                                      | IP00009456                                                                                                                                                | 93,802.00                     | 100.00%                            | 8                         | 9                        | 28                      | 30.40%                       |
| LK-2 Repeat 1              | KRT9 Keratin, type I cytokeratin 9                                                                                                                                                                                                                                                                                                                                                                                                                                                                                                                                                                                                                                                                                                                                                                                                                                                                                                                                                                                                                                                                                                                                                            | IP00019399                                                                                                                                                | 62,113.00                     | 100.00%                            | 11                        | 12                       | 48                      | 24.90%                       |
| LK-2 Repeat 1              | ATP5A1 ATP synthase subunit alpha, mitochondrial precursor                                                                                                                                                                                                                                                                                                                                                                                                                                                                                                                                                                                                                                                                                                                                                                                                                                                                                                                                                                                                                                                                                                                                    | IP00404949                                                                                                                                                | 57,417.00                     | 100.00%                            | 7                         | 7                        | 17                      | 17.20%                       |
| LK-2 Repeat 1              | TUBB8 Tubulin beta-8                                                                                                                                                                                                                                                                                                                                                                                                                                                                                                                                                                                                                                                                                                                                                                                                                                                                                                                                                                                                                                                                                                                                                                          | IP00646770                                                                                                                                                | 50,072.40                     | 100.00%                            | 3                         | 3                        | 6                       | 32.70%                       |
| LK-2 Repeat 1              | GMB2 Guanine nucleotide-binding protein G(I)/G(S)/G(T) subunit beta-2                                                                                                                                                                                                                                                                                                                                                                                                                                                                                                                                                                                                                                                                                                                                                                                                                                                                                                                                                                                                                                                                                                                         | IP00003439                                                                                                                                                | 37,331.80                     | 99.80%                             | 2                         | 2                        | 2                       | 20.60%                       |
| LK-2 Repeat 1              | EE2 Eukaryotic elongation factor 2                                                                                                                                                                                                                                                                                                                                                                                                                                                                                                                                                                                                                                                                                                                                                                                                                                                                                                                                                                                                                                                                                                                                                            | IP00018290                                                                                                                                                | 35,322.10                     | 100.00%                            | 2                         | 2                        | 3                       | 4.90%                        |
| LK-2 Repeat 1              | RP118 80S ribosomal protein L18                                                                                                                                                                                                                                                                                                                                                                                                                                                                                                                                                                                                                                                                                                                                                                                                                                                                                                                                                                                                                                                                                                                                                               | IP00021579                                                                                                                                                | 21,637.20                     | 100.00%                            | 3                         | 3                        | 7                       | 25.50%                       |
| LK-2 Repeat 1              | RP518 80S ribosomal protein 518                                                                                                                                                                                                                                                                                                                                                                                                                                                                                                                                                                                                                                                                                                                                                                                                                                                                                                                                                                                                                                                                                                                                                               | IP00013296                                                                                                                                                | 17,170.30                     | 100.00%                            | 5                         | 5                        | 10                      | 30.30%                       |
| LK-2 Repeat 1              | LMBN1 Lamin-B1                                                                                                                                                                                                                                                                                                                                                                                                                                                                                                                                                                                                                                                                                                                                                                                                                                                                                                                                                                                                                                                                                                                                                                                | IP00021797,IP00700831                                                                                                                                     | 44,627.00                     | 100.00%                            | 2                         | 2                        | 3                       | 5.94%                        |
| LK-2 Repeat 1              | H2AFY Histone H2AF, member Y isoform 2                                                                                                                                                                                                                                                                                                                                                                                                                                                                                                                                                                                                                                                                                                                                                                                                                                                                                                                                                                                                                                                                                                                                                        | IP00009366,IP00304717,IP00744144                                                                                                                          | 39,166.80                     | 100.00%                            | 3                         | 3                        | 11                      | 8.13%                        |
| LK-2 Repeat 1              | FBI2 FBI2, 2 precursor                                                                                                                                                                                                                                                                                                                                                                                                                                                                                                                                                                                                                                                                                                                                                                                                                                                                                                                                                                                                                                                                                                                                                                        | IP00021824,IP00546318                                                                                                                                     | 113,485.60                    | 100.00%                            | 8                         | 9                        | 12                      | 6.62%                        |
| LK-2 Repeat 1              | NCL Isoform 1 of Nucleolin                                                                                                                                                                                                                                                                                                                                                                                                                                                                                                                                                                                                                                                                                                                                                                                                                                                                                                                                                                                                                                                                                                                                                                    | IP00442492,IP00604620,IP00827674                                                                                                                          | 74,830.20                     | 99.80%                             | 2                         | 2                        | 2                       | 2.82%                        |
| LK-2 Repeat 1              | RP17A 80S ribosomal protein L17a                                                                                                                                                                                                                                                                                                                                                                                                                                                                                                                                                                                                                                                                                                                                                                                                                                                                                                                                                                                                                                                                                                                                                              | IP00029773,IP00579115                                                                                                                                     | 30,531.30                     | 100.00%                            | 4                         | 4                        | 6                       | 22.20%                       |
| LK-2 Repeat 1              | ANKA6 Anknk-6                                                                                                                                                                                                                                                                                                                                                                                                                                                                                                                                                                                                                                                                                                                                                                                                                                                                                                                                                                                                                                                                                                                                                                                 | IP00024939,IP00221226                                                                                                                                     | 75,859.50                     | 100.00%                            | 17                        | 18                       | 26                      | 31.40%                       |
| LK-2 Repeat 1              | RP165 80S ribosomal protein 13                                                                                                                                                                                                                                                                                                                                                                                                                                                                                                                                                                                                                                                                                                                                                                                                                                                                                                                                                                                                                                                                                                                                                                | IP00005021,IP00651660                                                                                                                                     | 40,634.10                     | 99.80%                             | 2                         | 2                        | 2                       | 5.93%                        |
| LK-2 Repeat 1              | BAAT1 Isoform 1 of Mitochondrial inner membrane protein                                                                                                                                                                                                                                                                                                                                                                                                                                                                                                                                                                                                                                                                                                                                                                                                                                                                                                                                                                                                                                                                                                                                       | IP00009960,IP00670020,IP00505466                                                                                                                          | 65,467.80                     | 100.00%                            | 4                         | 4                        | 6                       | 6.83%                        |
| LK-2 Repeat 1              | HSP81A Isoform 1 of Heat shock cognate 7.1a protein                                                                                                                                                                                                                                                                                                                                                                                                                                                                                                                                                                                                                                                                                                                                                                                                                                                                                                                                                                                                                                                                                                                                           | IP00003865                                                                                                                                                | 70,881.80                     | 100.00%                            | 6                         | 6                        | 12                      | 12.70%                       |
| LK-2 Repeat 1              | PABPC1 Isoform 1 of Poly(A)-binding protein 1                                                                                                                                                                                                                                                                                                                                                                                                                                                                                                                                                                                                                                                                                                                                                                                                                                                                                                                                                                                                                                                                                                                                                 | IP00005824,IP00303011,IP00410011,IP00478322,IP00794246,IP00795945                                                                                         | 57,400.00                     | 100.00%                            | 2                         | 2                        | 2                       | 5.99%                        |
| LK-2 Repeat 1              | VIM Vimentin                                                                                                                                                                                                                                                                                                                                                                                                                                                                                                                                                                                                                                                                                                                                                                                                                                                                                                                                                                                                                                                                                                                                                                                  | IP00418471                                                                                                                                                | 53,634.60                     | 100.00%                            | 24                        | 27                       | 97                      | 53.90%                       |
| LK-2 Repeat 1              | COL6A3 alpha 1(3) VI collagen isoform 1 precursor                                                                                                                                                                                                                                                                                                                                                                                                                                                                                                                                                                                                                                                                                                                                                                                                                                                                                                                                                                                                                                                                                                                                             | IP00022200                                                                                                                                                | 343,678.80                    | 100.00%                            | 63                        | 68                       | 222                     | 26.70%                       |
| LK-2 Repeat 1              | C1C1 isoform 1 of Cathepsin heavy chain 1                                                                                                                                                                                                                                                                                                                                                                                                                                                                                                                                                                                                                                                                                                                                                                                                                                                                                                                                                                                                                                                                                                                                                     | IP00004062,IP00455383                                                                                                                                     | 187,878.80                    | 99.80%                             | 2                         | 2                        | 4                       | 1.28%                        |
| LK-2 Repeat 1              | NID1 Niemann-Pick 1                                                                                                                                                                                                                                                                                                                                                                                                                                                                                                                                                                                                                                                                                                                                                                                                                                                                                                                                                                                                                                                                                                                                                                           | IP00025944,IP00838542                                                                                                                                     | 129,725.20                    | 100.00%                            | 15                        | 15                       | 20                      | 15.20%                       |
| LK-2 Repeat 1              | SULCSA1 Sulfocysteine sulfoxide translocase 2                                                                                                                                                                                                                                                                                                                                                                                                                                                                                                                                                                                                                                                                                                                                                                                                                                                                                                                                                                                                                                                                                                                                                 | IP00021979                                                                                                                                                | 31,046.20                     | 99.80%                             | 2                         | 2                        | 2                       | 6.89%                        |
| LK-2 Repeat 1              | SERPINE1 Serpinonein activator inhibitor 1 precursor                                                                                                                                                                                                                                                                                                                                                                                                                                                                                                                                                                                                                                                                                                                                                                                                                                                                                                                                                                                                                                                                                                                                          | IP00007118                                                                                                                                                | 45,042.20                     | 99.80%                             | 2                         | 2                        | 2                       | 9.20%                        |
| LK-2 Repeat 1              | VOAC3 Isoform 1 of Voltage-dependent anion-selective channel protein 3                                                                                                                                                                                                                                                                                                                                                                                                                                                                                                                                                                                                                                                                                                                                                                                                                                                                                                                                                                                                                                                                                                                        | IP00011894,IP00294779                                                                                                                                     | 30,778.10                     | 100.00%                            | 5                         | 5                        | 8                       | 21.80%                       |
| LK-2 Repeat 1              | RP518 80S ribosomal protein 518                                                                                                                                                                                                                                                                                                                                                                                                                                                                                                                                                                                                                                                                                                                                                                                                                                                                                                                                                                                                                                                                                                                                                               | IP00013272                                                                                                                                                | 28,006.80                     | 100.00%                            | 2                         | 2                        | 4                       | 10.50%                       |
| LK-2 Repeat 1              | LAMMS Laminin subunit alpha 5 precursor                                                                                                                                                                                                                                                                                                                                                                                                                                                                                                                                                                                                                                                                                                                                                                                                                                                                                                                                                                                                                                                                                                                                                       | IP00793665                                                                                                                                                | 399,725.10                    | 100.00%                            | 15                        | 15                       | 28                      | 5.80%                        |
| LK-2 Repeat 1              | PTF8 poly(ADP-ribose) transferase 8 precursor                                                                                                                                                                                                                                                                                                                                                                                                                                                                                                                                                                                                                                                                                                                                                                                                                                                                                                                                                                                                                                                                                                                                                 | IP00646304                                                                                                                                                | 23,272.20                     | 99.80%                             | 2                         | 2                        | 2                       | 2.80%                        |
| LK-2 Repeat 1              | BST1 ADP-ribosyl cysteine 2 precursor                                                                                                                                                                                                                                                                                                                                                                                                                                                                                                                                                                                                                                                                                                                                                                                                                                                                                                                                                                                                                                                                                                                                                         | IP00026240,IP00657860                                                                                                                                     | 37,462.20                     | 100.00%                            | 3                         | 3                        | 3                       | 9.91%                        |
| LK-2 Repeat 1              | HST1H4, HST1H4B, HST1H4C, HST1H4D, HST1H4E, HST1H4F, HST1H4G, HST1H4H, HST1H4I, HST1H4J, HST1H4K, HST1H4L, HST1H4M, HST1H4N, HST1H4O, HST1H4P, HST1H4Q, HST1H4R, HST1H4S, HST1H4T, HST1H4U, HST1H4V, HST1H4W, HST1H4X, HST1H4Y, HST1H4Z, HST1H4A, HST1H4B, HST1H4C, HST1H4D, HST1H4E, HST1H4F, HST1H4G, HST1H4H, HST1H4I, HST1H4J, HST1H4K, HST1H4L, HST1H4M, HST1H4N, HST1H4O, HST1H4P, HST1H4Q, HST1H4R, HST1H4S, HST1H4T, HST1H4U, HST1H4V, HST1H4W, HST1H4X, HST1H4Y, HST1H4Z, HST1H4A, HST1H4B, HST1H4C, HST1H4D, HST1H4E, HST1H4F, HST1H4G, HST1H4H, HST1H4I, HST1H4J, HST1H4K, HST1H4L, HST1H4M, HST1H4N, HST1H4O, HST1H4P, HST1H4Q, HST1H4R, HST1H4S, HST1H4T, HST1H4U, HST1H4V, HST1H4W, HST1H4X, HST1H4Y, HST1H4Z, HST1H4A, HST1H4B, HST1H4C, HST1H4D, HST1H4E, HST1H4F, HST1H4G, HST1H4H, HST1H4I, HST1H4J, HST1H4K, HST1H4L, HST1H4M, HST1H4N, HST1H4O, HST1H4P, HST1H4Q, HST1H4R, HST1H4S, HST1H4T, HST1H4U, HST1H4V, HST1H4W, HST1H4X, HST1H4Y, HST1H4Z, HST1H4A, HST1H4B, HST1H4C, HST1H4D, HST1H4E, HST1H4F, HST1H4G, HST1H4H, HST1H4I, HST1H4J, HST1H4K, HST1H4L, HST1H4M, HST1H4N, HST1H4O, HST1H4P, HST1H4Q, HST1H4R, HST1H4S, HST1H4T, HST1H4U, HST1H4V, HST1H4W, HST1H4X |                                                                                                                                                           |                               |                                    |                           |                          |                         |                              |



| Biological sample category | Gene symbol and protein name                                                      | Protein accession numbers                                                                            | Protein molecular weight (Da) | Protein identification probability | Number of unique peptides | Number of unique spectra | Number of total spectra | Percentage sequence coverage |
|----------------------------|-----------------------------------------------------------------------------------|------------------------------------------------------------------------------------------------------|-------------------------------|------------------------------------|---------------------------|--------------------------|-------------------------|------------------------------|
| LX2 Repeat 1               | HST1H8 Helicase H28 type-1 L                                                      | IP00015534,IP000152906,IP000303133,IP00321665,IP00419831,IP00477495,IP00554798,IP00794461,IP00816252 | 13,896.60                     | 100.00%                            | 4                         | 5                        | 57                      | 31.02%                       |
| LX2 Repeat 1               | RP8 60S ribosomal protein S8                                                      | IP00015597,IP003945201                                                                               | 21,862.70                     | 100.00%                            | 6                         | 13                       | 37                      | 87.0%                        |
| LX2 Repeat 1               | TMEM43 Transmembrane protein 43                                                   | IP00031280                                                                                           | 44,858.80                     | 100.00%                            | 13                        | 13                       | 21                      | 14.82%                       |
| LX2 Repeat 1               | VOAC2 Voltage-dependent anion-selective channel protein 1                         | IP00215208                                                                                           | 70,755.80                     | 100.00%                            | 1                         | 1                        | 1                       | 55.55%                       |
| LX2 Repeat 1               | VOAC2 Voltage-dependent anion-selective channel protein 2                         | IP00024452,IP000216024,IP00216026,IP00045531,IP0085744,IP00855873                                    | 36,214.80                     | 100.00%                            | 8                         | 9                        | 15                      | 30.26%                       |
| LX2 Repeat 1               | ATF3L2 Isoform 1 of ATF3 transcription factor 2                                   | IP00021929,IP00220300,IP0045663,IP00719184                                                           | 5,723.10                      | 99.80%                             | 2                         | 2                        | 3                       | 49.06%                       |
| LX2 Repeat 1               | EBLN2 Isoform 1 of Ebn2 zinc precursor                                            | IP00005942                                                                                           | 21,822.40                     | 100.00%                            | 6                         | 6                        | 10                      | 26.90%                       |
| LX2 Repeat 1               | PFES23 Serine esterase 23 precursor                                               | IP00005941                                                                                           | 42,988.40                     | 100.00%                            | 5                         | 5                        | 7                       | 15.10%                       |
| LX2 Repeat 1               | MPT2 Isoform 1 of Mitochondrial protein 2                                         | IP00023275                                                                                           | 18,222.20                     | 100.00%                            | 5                         | 5                        | 3                       | 5.15%                        |
| LX2 Repeat 1               | HSP90B1 85 kDa protein                                                            | IP00314775,IP00414676                                                                                | 83,149.30                     | 100.00%                            | 7                         | 7                        | 9                       | 10.90%                       |
| LX2 Repeat 1               | Ct cytochrome b5Hemolysin precursor, isoform 0                                    | IP00021566,IP00381335,IP007931819                                                                    | 47,998.20                     | 99.70%                             | 2                         | 2                        | 2                       | 4.87%                        |
| LX2 Repeat 1               | SLH4 Isoform 1 of Sirtuin locus protein 4                                         | IP00002712,IP00039142,IP00641714                                                                     | 21,133.20                     | 100.00%                            | 1                         | 1                        | 1                       | 24.90%                       |
| LX2 Repeat 1               | RP23 60S ribosomal protein S23                                                    | IP00021806,IP00393952                                                                                | 16,643.10                     | 100.00%                            | 2                         | 2                        | 9                       | 14.40%                       |
| LX2 Repeat 1               | NCO2 Nucleolin 2 precursor                                                        | IP00010293,IP00309313                                                                                | 10,0713.40                    | 100.00%                            | 1                         | 1                        | 2                       | 5.64%                        |
| LX2 Repeat 1               | RP15 60S ribosomal protein S15                                                    | IP00479528,IP00550032                                                                                | 24,156.50                     | 100.00%                            | 3                         | 3                        | 13                      | 13.70%                       |
| LX2 Repeat 1               | RP140 60S ribosomal protein S17                                                   | IP00013415                                                                                           | 21,109.50                     | 100.00%                            | 3                         | 3                        | 8                       | 21.60%                       |
| LX2 Repeat 1               | RP11 Isoform 1 of 60S ribosomal protein L11                                       | IP0031796,IP00746438                                                                                 | 20,107.10                     | 99.80%                             | 2                         | 2                        | 8                       | 13.00%                       |
| LX2 Repeat 1               | CYH61 Protein CYH61 precursor                                                     | IP00209219                                                                                           | 42,008.00                     | 100.00%                            | 3                         | 3                        | 1                       | 7.87%                        |
| LX2 Repeat 1               | BCP19 8 kDa receptor-associated protein 3                                         | IP00218200                                                                                           | 34,785.10                     | 100.00%                            | 3                         | 2                        | 2                       | 7.87%                        |
| LX2 Repeat 1               | ABO3 ADP-binding cassette sub-family D member 3                                   | IP00003372                                                                                           | 75,461.20                     | 100.00%                            | 3                         | 3                        | 3                       | 5.31%                        |
| LX2 Repeat 1               | EGF17 EGF-like domain-containing protein 7 precursor                              | IP00083960                                                                                           | 29,938.80                     | 99.80%                             | 2                         | 2                        | 2                       | 11.70%                       |
| LX2 Repeat 1               | TOMM88 Isoform 1 of Probable mitochondrial import receptor subunit TOMM88 homolog | IP00014052                                                                                           | 21,875.10                     | 100.00%                            | 2                         | 2                        | 3                       | 8.89%                        |
| LX2 Repeat 1               | SLC5A5 AdoP/ATP translocase 2                                                     | IP00007718                                                                                           | 33,878.50                     | 100.00%                            | 7                         | 7                        | 36                      | 28.50%                       |
| LX2 Repeat 1               | FLH4 Flamin-4                                                                     | IP00029520,IP00033354,IP00644576                                                                     | 27,623.30                     | 100.00%                            | 4                         | 4                        | 14                      | 2.69%                        |
| LX2 Repeat 1               | YHAE 14.3-3 protein ectopic                                                       | IP0000610                                                                                            | 19,157.00                     | 100.00%                            | 4                         | 4                        | 5                       | 16.10%                       |
| LX2 Repeat 1               | PHEH2D 5-phosphoglyoxylate dehydrogenase                                          | IP00011200,IP00642548                                                                                | 53,067.40                     | 99.80%                             | 2                         | 2                        | 2                       | 2.21%                        |
| LX2 Repeat 1               | RP5 60S ribosomal protein S5                                                      | IP00008432                                                                                           | 22,820.90                     | 100.00%                            | 2                         | 2                        | 4                       | 13.70%                       |
| LX2 Repeat 1               | TMC Isoform 1 of Tensin precursor                                                 | IP00011008                                                                                           | 240,885.20                    | 100.00%                            | 46                        | 49                       | 154                     | 29.00%                       |
| LX2 Repeat 1               | CHCHD3 Cochlin coil helix-coiled-coil helix domain-containing protein 3           | IP00015823                                                                                           | 26,131.50                     | 100.00%                            | 3                         | 3                        | 4                       | 21.10%                       |
| LX2 Repeat 1               | SAMM50 Sorting and assembly machinery component 50 homolog                        | IP00412713                                                                                           | 51,959.50                     | 100.00%                            | 4                         | 4                        | 7                       | 11.90%                       |
| LX2 Repeat 1               | HSP91 Heat shock protein beta-1                                                   | IP00021512                                                                                           | 22,766.40                     | 100.00%                            | 3                         | 3                        | 4                       | 17.60%                       |
| LX2 Repeat 1               | RP14 60S ribosomal protein L24                                                    | IP00086132,IP00791426,IP00793696                                                                     | 21,469.30                     | 100.00%                            | 3                         | 3                        | 4                       | 27.30%                       |
| LX2 Repeat 1               | LAMB3 Laminin subunit beta-1 precursor                                            | IP00013970,IP00831854                                                                                | 200,407.00                    | 99.80%                             | 2                         | 2                        | 2                       | 1.16%                        |
| LX2 Repeat 1               | ANXA5 Annexin A5                                                                  | IP00017805                                                                                           | 18,192.60                     | 100.00%                            | 2                         | 2                        | 2                       | 7.50%                        |
| LX2 Repeat 1               | KRT2 Keratin, type II cytoskeletal 2 epidermal                                    | IP00021104                                                                                           | 66,848.40                     | 100.00%                            | 2                         | 2                        | 7                       | 6.36%                        |
| LX2 Repeat 1               | RP13 60S ribosomal protein S13                                                    | IP00021008                                                                                           | 17,205.10                     | 100.00%                            | 6                         | 7                        | 15                      | 33.80%                       |
| LX2 Repeat 1               | RP13 60S ribosomal protein S13                                                    | IP00021513,IP00042805,IP00795408                                                                     | 15,493.10                     | 100.00%                            | 7                         | 7                        | 7                       | 30.70%                       |
| LX2 Repeat 1               | RP9 60S ribosomal protein S9                                                      | IP00021088                                                                                           | 22,574.50                     | 100.00%                            | 7                         | 7                        | 26                      | 23.70%                       |
| LX2 Repeat 1               | ATP5B ATP synthase subunit beta, mitochondrial precursor                          | IP00030476                                                                                           | 16,645.10                     | 100.00%                            | 16                        | 16                       | 25                      | 40.50%                       |
| LX2 Repeat 1               | RP127 60S ribosomal protein S127                                                  | IP00197358,IP00511971,IP00746004                                                                     | 9,442.90                      | 99.80%                             | 2                         | 2                        | 4                       | 25.00%                       |
| LX2 Repeat 1               | RP16 60S ribosomal protein S16                                                    | IP00021092                                                                                           | 16,427.90                     | 100.00%                            | 3                         | 3                        | 9                       | 19.90%                       |
| LX2 Repeat 1               | RP15A 60S ribosomal protein S15A                                                  | IP00021091                                                                                           | 9,809.90                      | 100.00%                            | 3                         | 3                        | 4                       | 18.50%                       |
| LX2 Repeat 1               | GSN Isoform 1 of Gelsolin precursor                                               | IP00020314,IP00064673                                                                                | 80,622.80                     | 100.00%                            | 4                         | 4                        | 5                       | 6.88%                        |
| LX2 Repeat 1               | KRT1 Keratin, type I cytoskeletal 1                                               | IP00021023                                                                                           | 66,600.20                     | 100.00%                            | 10                        | 10                       | 6                       | 16.10%                       |
| LX2 Repeat 1               | INT5 5-nucleotidylase precursor                                                   | IP00009456                                                                                           | 61,351.00                     | 100.00%                            | 8                         | 8                        | 13                      | 21.10%                       |
| LX2 Repeat 1               | KRT9 Keratin, type I cytokeratin 9                                                | IP00001939                                                                                           | 62,111.00                     | 100.00%                            | 7                         | 8                        | 31                      | 14.60%                       |
| LX2 Repeat 1               | ATP5A1 ATP synthase subunit alpha, mitochondrial precursor                        | IP00040493                                                                                           | 59,724.10                     | 100.00%                            | 5                         | 6                        | 36                      | 36.70%                       |
| LX2 Repeat 1               | DDK5 Probable ATP-dependent RNA helicase DDK5                                     | IP00017617,IP00020398,IP00616553,IP00816877                                                          | 79,525.20                     | 99.80%                             | 2                         | 2                        | 3                       | 5.52%                        |
| LX2 Repeat 1               | LAMB4 Isoform 1 of Laminin subunit alpha-4 precursor                              | IP00219402,IP00793210                                                                                | 292,507.50                    | 99.80%                             | 2                         | 2                        | 2                       | 3.89%                        |
| LX2 Repeat 1               | RP131 60S ribosomal protein L31                                                   | IP00020302,IP00848311,IP00856658                                                                     | 13,978.00                     | 100.00%                            | 3                         | 3                        | 6                       | 28.90%                       |
| LX2 Repeat 1               | TMEM33 Transmembrane protein 33                                                   | IP00029084                                                                                           | 27,961.70                     | 99.80%                             | 2                         | 2                        | 2                       | 9.31%                        |
| LX2 Repeat 1               | RP18 60S ribosomal protein L18                                                    | IP00021171                                                                                           | 21,617.20                     | 100.00%                            | 3                         | 3                        | 11                      | 30.90%                       |
| LX2 Repeat 1               | RP18 60S ribosomal protein S18                                                    | IP00011206                                                                                           | 17,703.10                     | 100.00%                            | 7                         | 8                        | 27                      | 38.80%                       |
| LX2 Repeat 1               | HSY19 HCA isoform family, member Y isoform 2                                      | IP00019566,IP000204171,IP00704448                                                                    | 38,166.80                     | 100.00%                            | 6                         | 6                        | 8                       | 17.80%                       |
| LX2 Repeat 1               | XKCC5 ATP-dependent DNA helicase 2 subunit 2                                      | IP00021084                                                                                           | 82,689.10                     | 99.80%                             | 2                         | 2                        | 2                       | 3.64%                        |
| LX2 Repeat 1               | FLN2 Fibulin 2 precursor                                                          | IP00021384,IP00466518                                                                                | 31,846.50                     | 99.60%                             | 2                         | 2                        | 2                       | 1.94%                        |
| LX2 Repeat 1               | RP17A 60S ribosomal protein L17A                                                  | IP00029971,IP00393915                                                                                | 25,979.30                     | 100.00%                            | 2                         | 2                        | 3                       | 11.50%                       |
| LX2 Repeat 1               | RP1 60S ribosomal protein L1                                                      | IP00051021,IP00061660                                                                                | 40,134.10                     | 99.80%                             | 2                         | 2                        | 2                       | 5.91%                        |
| LX2 Repeat 1               | ANXA6 Annexin A6                                                                  | IP00002450,IP00021216                                                                                | 17,893.50                     | 100.00%                            | 23                        | 24                       | 34                      | 40.30%                       |
| LX2 Repeat 1               | IMMT Isoform 1 of Mitochondrial inner membrane protein                            | IP00009990,IP00470829,IP00505469                                                                     | 82,607.80                     | 100.00%                            | 11                        | 11                       | 17                      | 17.70%                       |
| LX2 Repeat 1               | NUV1B Isoform 1 of Nuv1B protein                                                  | IP00021187,IP00787897                                                                                | 44,158.40                     | 100.00%                            | 4                         | 4                        | 4                       | 15.90%                       |
| LX2 Repeat 1               | HSFAB Isoform 1 of Heat shock cognate 71 kDa protein                              | IP00001866                                                                                           | 70,881.80                     | 100.00%                            | 7                         | 7                        | 10                      | 25.80%                       |
| LX2 Repeat 1               | RP18A 60S ribosomal protein L18a                                                  | IP00021020,IP00084774                                                                                | 15,773.50                     | 99.80%                             | 2                         | 2                        | 2                       | 16.20%                       |
| LX2 Repeat 1               | VSM9 Vincristin                                                                   | IP00021873                                                                                           | 15,129.40                     | 99.80%                             | 24                        | 24                       | 24                      | 48.30%                       |
| LX2 Repeat 1               | COL6A3 alpha 3(I) Type VI collagen isoform 1 precursor                            | IP00021200                                                                                           | 343,649.40                    | 100.00%                            | 79                        | 90                       | 356                     | 32.40%                       |
| LX2 Repeat 1               | CLT1 Isoform 1 of Clathrin heavy chain 1                                          | IP00021407,IP00465583                                                                                | 98,879.80                     | 99.80%                             | 2                         | 2                        | 5                       | 1.28%                        |
| LX2 Repeat 1               | COL4A2 Collagen alpha 1(IV) chain precursor                                       | IP00019096,IP00084480                                                                                | 108,618.40                    | 100.00%                            | 2                         | 2                        | 2                       | 2.52%                        |
| LX2 Repeat 1               | RAL1 Isoform 1 of RalA nucleoside-binding protein Ral1                            | IP00011268,IP00216044,IP00640993,IP00041531,IP0064212,IP00847852                                     | 32,448.90                     | 99.50%                             | 2                         | 2                        | 2                       | 7.19%                        |
| LX2 Repeat 1               | NCO1 Isoform 1 of Nucleolin 1 precursor                                           | IP00020544,IP00304542                                                                                | 10,203.20                     | 100.00%                            | 1                         | 1                        | 1                       | 5.39%                        |
| LX2 Repeat 1               | RP127A 60S ribosomal protein L27a                                                 | IP00398135,IP00465678,IP00826716                                                                     | 16,412.20                     | 100.00%                            | 3                         | 3                        | 5                       | 24.50%                       |
| LX2 Repeat 1               | SEPRIN1 Serpinoneuroxin activator inhibitor 1 precursor                           | IP00007718                                                                                           | 46,042.20                     | 100.00%                            | 7                         | 7                        | 13                      | 27.40%                       |
| LX2 Repeat 1               | VOAC1 Voltage-dependent anion-selective channel protein 3                         | IP00001804,IP00029479                                                                                | 57,773.10                     | 100.00%                            | 6                         | 6                        | 20                      | 22.00%                       |
| LX2 Repeat 1               | RP4 60S ribosomal protein S4                                                      | IP00021772                                                                                           | 28,008.80                     | 100.00%                            | 5                         | 6                        | 11                      | 23.00%                       |
| LX2 Repeat 1               | LAMB5 Laminin subunit alpha-5 precursor                                           | IP00019665                                                                                           | 399,725.10                    | 99.80%                             | 5                         | 5                        | 3                       | 3.28%                        |
| LX2 Repeat 1               | AMP1 ADP-ribosylation factor 1                                                    | IP00215914,IP00215917                                                                                | 20,581.70                     | 100.00%                            | 5                         | 5                        | 7                       | 40.90%                       |
| LX2 Repeat 1               | HST1H8 Helicase H28 type-1 L                                                      | IP00411873                                                                                           | 11,349.70                     | 100.00%                            | 12                        | 16                       | 67                      | 57.10%                       |
| LX2 Repeat 1               | GNA2 G-protein nucleotide-binding protein G12, subunit 2                          | IP00040412,IP00748345                                                                                | 30,434.00                     | 100.00%                            | 1                         | 1                        | 1                       | 13.30%                       |
| LX2 Repeat 1               | HST1H9 Helicase H28 type-1 L                                                      | IP00416070                                                                                           | 15,386.70                     | 99.90%                             | 2                         | 2                        | 10                      | 14.70%                       |
| LX2 Repeat 1               | TSM1 Transmembrane protein 1                                                      | IP00216103,IP00226630,IP00712823                                                                     | 18,168.10                     | 100.00%                            | 3                         | 3                        | 2                       | 14.20%                       |
| LX2 Repeat 1               | RP101 60S ribosomal protein L10                                                   | IP00174202,IP00554721,IP00646889,IP00851661                                                          | 24,556.60                     | 100.00%                            | 3                         | 3                        | 5                       | 11.70%                       |
| LX2 Repeat 1               | COL6A1 Collagen alpha-1(I) chain precursor                                        | IP00029136                                                                                           | 305,512.90                    | 100.00%                            | 18                        | 22                       | 34                      | 24.90%                       |
| LX2 Repeat 1               | MMP8 Matrix metalloproteinase 8                                                   | IP00019602                                                                                           | 226,515.50                    | 100.00%                            | 87                        | 48                       | 62                      | 49.70%                       |
| LX2 Repeat 1               | ACTR2 Actin-related protein 2/3 complex subunit 2                                 | IP00011559                                                                                           | 44,724.70                     | 100.00%                            | 4                         | 4                        | 5                       | 12.70%                       |
| LX2 Repeat 1               | ETTF2 215 kDa liver nuclear ribonucleoprotein component                           | IP00005159                                                                                           | 31,929.40                     | 100.00%                            | 7                         | 7                        | 11                      | 31.40%                       |
| LX2 Repeat 1               | ANXA2 Annexin A2                                                                  | IP00441569,IP00453115                                                                                | 38,588.10                     | 100.00%                            | 4                         | 4                        | 6                       | 15.30%                       |
| LX2 Repeat 1               | COL1A1 Collagen alpha-1(I) chain precursor                                        | IP00029766                                                                                           | 318,849.80                    | 100.00%                            | 3                         | 4                        | 13                      | 3.34%                        |
| LX2 Repeat 1               | ABPC2 Actin-binding protein 2/3 complex subunit 2                                 | IP00005161                                                                                           | 31,608.10                     | 100.00%                            | 3                         | 3                        | 1                       | 11.00%                       |
| LX2 Repeat 1               | RP11,LOC719482,LOC715167 60S ribosomal protein L11                                | IP00247583,IP00399713,IP00398911,IP00477343,IP00478812,IP00788801,IP00845507                         | 9,868.30                      | 99.80%                             | 2                         | 2                        | 5                       | 29.90%                       |
| LX2 Repeat 1               | FBX1 32 kDa protein                                                               | IP00781428                                                                                           | 31,227.60                     | 100.00%                            | 39                        | 39                       | 153                     | 25.60%                       |
| LX2 Repeat 1               | MTM20 MyoB associated differentiation marker                                      | IP00102685,IP00038137,IP00619799,IP00658209                                                          | 36,222.50                     | 99.80%                             | 2                         | 2                        | 5                       | 13.60%                       |
| LX2 Repeat 1               | HNRNP1 Heterogeneous nuclear ribonucleoprotein U                                  | IP00471017,IP00444079,IP00644224                                                                     | 61,732.00                     | 100.00%                            | 3                         | 3                        | 8                       | 7.10%                        |
| LX2 Repeat 1               | RP17 60S ribosomal protein L17                                                    | IP00001701,IP00344131,IP00712713,IP00794746                                                          | 26,445.70                     | 100.00%                            | 5                         | 5                        | 6                       | 26.40%                       |
| LX2 Repeat 1               | RP12 60S ribosomal protein L12                                                    | IP00021493                                                                                           | 17,801.10                     | 99.80%                             | 4                         | 4                        | 5                       | 39.40%                       |
| LX2 Repeat 1               | RP14S 60S ribosomal protein S12                                                   | IP00013485,IP00479366                                                                                | 21,421.20                     | 100.00%                            | 6                         | 7                        | 18                      | 25.60%                       |
| LX2 Repeat 1               | ML6 Isoform Non-muscle of Myosin light polypeptide 6                              | IP00335168,IP0024444,IP00789605,IP00796166,IP00797001                                                | 18,481.20                     | 100.00%                            | 9                         | 11                       | 22                      | 52.70%                       |
| LX2 Repeat 1               | RP14L 60S ribosomal protein L14                                                   | IP00021822,IP00069693,IP0055744,IP00799139,IP00815843                                                | 15,581.30                     | 100.00%                            | 3                         | 3                        | 7                       | 28.20%                       |
| LX2 Repeat 1               | RP14K 60S ribosomal protein L4, X isoform                                         | IP00021708                                                                                           | 15,958.10                     | 100.00%                            | 2                         | 2                        | 2                       | 38.40%                       |
| LX2 Repeat 1               | RP17 60S ribosomal protein S17                                                    | IP00021093,IP00478114,IP00711517                                                                     | 15,902.00                     | 99.70%                             | 2                         | 2                        | 4                       | 16.20%                       |
| LX2 Repeat 1               | PHB2 Phorbol-2                                                                    | IP00021712                                                                                           | 31,273.60                     | 100.00%                            | 7                         | 7                        | 11                      | 31.40%                       |
| LX2 Repeat 1               | HNRNP1 Heterogeneous nuclear ribonucleoprotein H                                  | IP00013883,IP00479191                                                                                | 51,212.10                     | 99.80%                             | 2                         | 2                        | 2                       | 6.99%                        |
| LX2 Repeat 1               | TFP2 Tissue factor pathway inhibitor 2 precursor                                  | IP00009198                                                                                           | 26,948.80                     | 100.00%                            | 4                         | 4                        | 5                       | 27.20%                       |
| LX2 Repeat 1               | PF                                                                                |                                                                                                      |                               |                                    |                           |                          |                         |                              |

| Biological sample category | Gene symbol and protein name                                                     | Protein accession numbers                                                                                                           | Protein molecular weight (Da) | Protein identification probability | Number of unique peptides | Number of unique spectra | Number of total spectra | Percentage sequence coverage |
|----------------------------|----------------------------------------------------------------------------------|-------------------------------------------------------------------------------------------------------------------------------------|-------------------------------|------------------------------------|---------------------------|--------------------------|-------------------------|------------------------------|
| LC2 Repeat 1               | DOCK4 ATP-dependent RNA helicase DOCK4                                           | IP00215637                                                                                                                          | 73,227.70                     | 100.00%                            | 4                         | 4                        | 6                       | 6.80%                        |
| LC2 Repeat 1               | RHOCC rho-related GTP-binding protein RHOCC precursor                            | IP00027634,IP00127000,IP00478231,IP00525834,IP00543368,IP00544425,IP00647268,IP00789202,IP00789866,IP00789934                       | 51,919.20                     | 99.50%                             | 2                         | 2                        | 2                       | 18.50%                       |
| LC2 Repeat 1               | HST13AH Histone H2A type 1-H                                                     | IP00081838,IP00102165,IP00216457,IP00220455,IP00225131,IP00291764,IP00393274,IP00552873                                             | 19,918.80                     | 100.00%                            | 4                         | 4                        | 32                      | 30.50%                       |
| LC2 Repeat 1               | STOM Synaptosomal band 7 integral membrane protein                               | IP00215928                                                                                                                          | 17,174.10                     | 100.00%                            | 5                         | 5                        | 7                       | 23.60%                       |
| LC2 Repeat 1               | RP117 60S ribosomal protein L17                                                  | IP00413334,IP00478208,IP00514874                                                                                                    | 21,381.30                     | 100.00%                            | 6                         | 7                        | 11                      | 16.30%                       |
| LC2 Repeat 1               | COL4A2 Collagen alpha 2(IV) chain precursor                                      | IP00366322,IP00477950,IP00883342                                                                                                    | 167,158.20                    | 99.90%                             | 2                         | 2                        | 3                       | 1.56%                        |
| LC2 Repeat 1               | FLJ027808                                                                        | IP00709008                                                                                                                          | 47,045.90                     | 100.00%                            | 36                        | 37                       | 25                      | 49.30%                       |
| LC2 Repeat 1               | SEPPINH Serpin H1 precursor                                                      | IP00023140                                                                                                                          | 46,424.40                     | 100.00%                            | 4                         | 4                        | 4                       | 12.90%                       |
| LC2 Repeat 1               | COL12A1 Isoform 1 of Collagen alpha 1(II) chain precursor                        | IP00235773                                                                                                                          | 325,127.30                    | 100.00%                            | 46                        | 45                       | 160                     | 29.40%                       |
| LC2 Repeat 1               | COL5A1 Collagen alpha 1(V) chain precursor                                       | IP00477611,IP00844090                                                                                                               | 183,544.70                    | 100.00%                            | 3                         | 3                        | 8                       | 2.77%                        |
| LC2 Repeat 1               | ATP5C1 Isoform L of ATP synthase gamma chain, mitochondrial precursor            | IP00039769,IP00478410                                                                                                               | 32,880.00                     | 100.00%                            | 4                         | 4                        | 4                       | 14.80%                       |
| LC2 Repeat 1               | HST13BH Histone H2B type 2-E                                                     | IP00009189,IP00112788,IP00220403,IP00515061                                                                                         | 17,888.70                     | 100.00%                            | 9                         | 9                        | 14                      | 9.80%                        |
| LC2 Repeat 1               | RP119A 60S ribosomal protein L19A                                                | IP00412475,IP00827108                                                                                                               | 24,829.20                     | 100.00%                            | 8                         | 9                        | 14                      | 37.00%                       |
| LC2 Repeat 1               | RP527A URUC ubiquitin and ribosomal protein 527a precursor                       | IP00217930                                                                                                                          | 17,947.60                     | 100.00%                            | 9                         | 9                        | 16                      | 30.10%                       |
| LC2 Repeat 1               | LRF1 Isoform 1 of Regulator of nonsense transcripts 1                            | IP00014049,IP00399170                                                                                                               | 123,018.30                    | 99.80%                             | 2                         | 2                        | 2                       | 1.88%                        |
| LC2 Repeat 1               | RP12A/LOC116002 60S ribosomal protein L21a                                       | IP00021266,IP00176755,IP00789159,IP00789523,IP00789484                                                                              | 17,786.10                     | 100.00%                            | 3                         | 3                        | 3                       | 20.90%                       |
| LC2 Repeat 1               | CFL1 Golfen 1                                                                    | IP00021261                                                                                                                          | 18,485.10                     | 99.90%                             | 2                         | 2                        | 2                       | 11.60%                       |
| LC2 Repeat 1               | Serum albumin precursor                                                          | IP00789398                                                                                                                          | 69,276.20                     | 100.00%                            | 17                        | 19                       | 49                      | 31.60%                       |
| LC2 Repeat 1               | CAP44 Isoform 1 of Capable-associated protein 4                                  | IP00413118,IP00433214,IP00604713                                                                                                    | 47,880.60                     | 100.00%                            | 6                         | 6                        | 11                      | 11.00%                       |
| LC2 Repeat 1               | RP514 60S ribosomal protein S3                                                   | IP00001253                                                                                                                          | 26,670.50                     | 100.00%                            | 8                         | 8                        | 21                      | 43.20%                       |
| LC2 Repeat 1               | MPOH2H1 Isoform 1 of M-phase phosphoprotein 1                                    | IP00044752,IP00412862,IP00644494,IP00827503                                                                                         | 21,413.70                     | 99.90%                             | 2                         | 2                        | 2                       | 1.13%                        |
| LC2 Repeat 1               | MPOH2H2 Isoform 2 of M-phase 1                                                   | IP00017626,IP00479307,IP00790503                                                                                                    | 231,296.70                    | 100.00%                            | 15                        | 15                       | 27                      | 19.10%                       |
| LC2 Repeat 1               | TOP2A DNA topoisomerase 2                                                        | IP00178867,IP00218753,IP00218754,IP00414101,IP00478232                                                                              | 178,871.20                    | 100.00%                            | 3                         | 3                        | 5                       | 2.42%                        |
| LC2 Repeat 1               | IP00029595                                                                       | IP00029595                                                                                                                          | 46,234.10                     | 100.00%                            | 3                         | 3                        | 3                       | 11.60%                       |
| LC2 Repeat 1               | RP526/LOC208973/LOC64166 40S ribosomal protein S26                               | IP00188712,IP00656560                                                                                                               | 12,997.50                     | 100.00%                            | 3                         | 3                        | 5                       | 31.90%                       |
| LC2 Repeat 1               | H2B95 Histone H2B                                                                | IP00662420,IP00145513,IP00454769,IP00479389,IP00748038,IP00748726,IP00787441                                                        | 7,638.10                      | 99.70%                             | 2                         | 2                        | 2                       | 20.90%                       |
| LC2 Repeat 1               | ACTR3 Actin-related protein 3                                                    | IP00028095                                                                                                                          | 47,353.80                     | 100.00%                            | 7                         | 7                        | 8                       | 22.70%                       |
| LC2 Repeat 1               | CNNK2A1 Casein kinase II subunit alpha                                           | IP00016613,IP00744507                                                                                                               | 45,126.50                     | 100.00%                            | 3                         | 3                        | 4                       | 13.00%                       |
| LC2 Repeat 1               | HSP101 101 heat shock protein, mitochondrial precursor                           | IP00417102,IP00789154                                                                                                               | 45,027.70                     | 100.00%                            | 2                         | 2                        | 3                       | 6.83%                        |
| LC2 Repeat 1               | CAVI1 Caveolin 1                                                                 | IP00009236,IP00885146                                                                                                               | 19,159.80                     | 100.00%                            | 5                         | 5                        | 14                      | 41.90%                       |
| LC2 Repeat 1               | RP31 60S ribosomal protein L9                                                    | IP00016693,IP00795717                                                                                                               | 19,048.70                     | 100.00%                            | 3                         | 3                        | 4                       | 15.80%                       |
| LC2 Repeat 1               | ACTN1 Actin actinin-1                                                            | IP00013598,IP00113808,IP00759776                                                                                                    | 41,723.20                     | 100.00%                            | 4                         | 4                        | 2                       | 2.41%                        |
| LC2 Repeat 1               | DOOST Ductal-type 4 phosphatidylethanolamine transferase precursor               | IP00027084                                                                                                                          | 58,784.50                     | 100.00%                            | 5                         | 5                        | 5                       | 11.80%                       |
| LC2 Repeat 1               | RP119B 60S ribosomal protein L19B                                                | IP00008698                                                                                                                          | 22,121.40                     | 100.00%                            | 4                         | 4                        | 5                       | 11.40%                       |
| LC2 Repeat 1               | TUBB Tubulin beta chain                                                          | IP00011654                                                                                                                          | 49,652.60                     | 100.00%                            | 24                        | 24                       | 202                     | 57.40%                       |
| LC2 Repeat 1               | RP135 60S ribosomal protein L35                                                  | IP00412607,IP00560247,IP00787131                                                                                                    | 16,627.10                     | 99.90%                             | 2                         | 2                        | 6                       | 24.00%                       |
| LC2 Repeat 1               | TUBB8 Tubulin protein                                                            | IP00644779                                                                                                                          | 35,072.40                     | 100.00%                            | 3                         | 3                        | 3                       | 37.10%                       |
| LC2 Repeat 1               | FN1 Fibronectin 1 Isoform 4 precursor                                            | IP00414283                                                                                                                          | 256,486.40                    | 100.00%                            | 36                        | 42                       | 141                     | 24.10%                       |
| LC2 Repeat 1               | ACT1 Actin, alpha cardiac muscle 1                                               | IP00023008                                                                                                                          | 42,002.10                     | 100.00%                            | 3                         | 4                        | 8                       | 38.70%                       |
| LC2 Repeat 1               | ACTB Actin, cytoplasmic 1                                                        | IP00021439,IP00201440,IP00840858                                                                                                    | 40,606.10                     | 100.00%                            | 19                        | 25                       | 137                     | 60.60%                       |
| LC2 Repeat 1               | TUBB8 8 Mb protein                                                               | IP00641706                                                                                                                          | 45,746.40                     | 99.90%                             | 2                         | 2                        | 2                       | 46.70%                       |
| LC2 Repeat 1               | LINC17 Isoform 1 of lincRNA-rich repeat-containing protein 17 precursor          | IP00021166                                                                                                                          | 15,788.50                     | 100.00%                            | 3                         | 3                        | 26                      | 26.10%                       |
| LC2 Repeat 1               | TUBB2C Tubulin beta 2C chain                                                     | IP00007773                                                                                                                          | 49,812.70                     | 100.00%                            | 3                         | 3                        | 9                       | 53.50%                       |
| LC2 Repeat 1               | TUBA1B Tubulin alpha 1B chain                                                    | IP00037144,IP00201627,IP00868759                                                                                                    | 49,632.10                     | 100.00%                            | 37                        | 33                       | 160                     | 56.40%                       |
| HF1 Repeat 1               | HSP63 Basement membrane-associated heparan sulfate core protein precursor        | IP00024384                                                                                                                          | 468,787.50                    | 100.00%                            | 39                        | 43                       | 112                     | 11.80%                       |
| HF1 Repeat 1               | HSP24H4 Hemoglobin subunit alpha                                                 | IP00410714,IP00863868                                                                                                               | 157,122.60                    | 100.00%                            | 121                       | 127                      | 141                     | 12.90%                       |
| HF1 Repeat 1               | COL5A2 Isoform 2 of Collagen alpha 2(V) chain precursor                          | IP00308480                                                                                                                          | 108,528.80                    | 100.00%                            | 16                        | 16                       | 27                      | 16.00%                       |
| HF1 Repeat 1               | TM91 TM91 membrane glycoprotein precursor                                        | IP00022892,IP00555577                                                                                                               | 15,885.70                     | 100.00%                            | 4                         | 4                        | 7                       | 17.20%                       |
| HF1 Repeat 1               | LMNA Isoform A of Lamin-A/C                                                      | IP00021405,IP00216552,IP00216951,IP00414204,IP00648087,IP00855812                                                                   | 55,621.60                     | 99.90%                             | 5                         | 5                        | 7                       | 11.90%                       |
| HF1 Repeat 1               | GAPDH Glyceraldehyde-3-phosphate dehydrogenase                                   | IP00021908,IP00795757                                                                                                               | 31,530.00                     | 99.90%                             | 2                         | 2                        | 3                       | 9.90%                        |
| HF1 Repeat 1               | FBX2 F-box protein 2 precursor                                                   | IP00018439,IP00789151                                                                                                               | 31,474.150                    | 99.80%                             | 2                         | 2                        | 3                       | 1.73%                        |
| HF1 Repeat 1               | TGFB1 Transforming growth factor beta-induced protein (h-3) precursor            | IP00018210                                                                                                                          | 74,664.90                     | 100.00%                            | 10                        | 10                       | 19                      | 16.10%                       |
| HF1 Repeat 1               | HST13BL Histone H2B type 1-L1                                                    | IP00020514,IP00201627                                                                                                               | 18,949.30                     | 100.00%                            | 12                        | 12                       | 13                      | 56.30%                       |
| HF1 Repeat 1               | ATP5D ATP synthase subunit D, mitochondrial precursor                            | IP00001761                                                                                                                          | 23,250.40                     | 99.80%                             | 2                         | 2                        | 2                       | 10.80%                       |
| HF1 Repeat 1               | TM4M4 Transmembrane protein 4                                                    | IP00012820                                                                                                                          | 44,858.80                     | 100.00%                            | 4                         | 4                        | 6                       | 14.00%                       |
| HF1 Repeat 1               | VOCAC1 Voltage-dependent anion-selective channel protein 1                       | IP00214308                                                                                                                          | 35,755.90                     | 100.00%                            | 12                        | 12                       | 7                       | 14.90%                       |
| HF1 Repeat 1               | VOCAC2 Voltage-dependent anion-selective channel protein 2                       | IP00021445,IP00216204,IP00216202,IP00455313,IP00857474,IP00858573                                                                   | 36,214.30                     | 100.00%                            | 4                         | 4                        | 7                       | 15.10%                       |
| HF1 Repeat 1               | PQ37N Isoform 1 of Perlecan precursor                                            | IP00007960,IP00213881,IP00410241,IP00564111                                                                                         | 18,222.40                     | 100.00%                            | 64                        | 70                       | 159                     | 25.80%                       |
| HF1 Repeat 1               | EKLN2 Isoform 1 of Eln-2 precursor                                               | IP00001642                                                                                                                          | 37,822.40                     | 99.90%                             | 2                         | 2                        | 7                       | 7.08%                        |
| HF1 Repeat 1               | FGF2 Fibroblast growth factor 2 precursor                                        | IP00114603                                                                                                                          | 19,792.70                     | 99.90%                             | 2                         | 2                        | 6                       | 3.82%                        |
| HF1 Repeat 1               | NC2 Nucleosome 2 precursor                                                       | IP00020826,IP00393933                                                                                                               | 507,123.60                    | 100.00%                            | 2                         | 2                        | 2                       | 2.06%                        |
| HF1 Repeat 1               | EPFM2F EGF-containing Fibulin like extracellular matrix protein 2 precursor      | IP00209028,IP00505567                                                                                                               | 67,737.30                     | 99.90%                             | 3                         | 2                        | 4                       | 3.60%                        |
| HF1 Repeat 1               | TNF1 Isoform 1 of Tumor necrosis factor                                          | IP00011008                                                                                                                          | 24,040.820                    | 100.00%                            | 40                        | 40                       | 40                      | 12.40%                       |
| HF1 Repeat 1               | HSP91 Heat shock protein beta-1                                                  | IP00002512                                                                                                                          | 22,764.60                     | 100.00%                            | 4                         | 4                        | 4                       | 24.90%                       |
| HF1 Repeat 1               | KRIS4 Keratin, type II cytoskeletal 6A                                           | IP00030725                                                                                                                          | 60,028.40                     | 99.90%                             | 2                         | 2                        | 3                       | 3.20%                        |
| HF1 Repeat 1               | KRT2 Keratin, type I cytoskeletal 2, superficial                                 | IP00021306                                                                                                                          | 35,848.40                     | 100.00%                            | 2                         | 2                        | 3                       | 10.40%                       |
| HF1 Repeat 1               | RP513 60S ribosomal protein S13                                                  | IP00021089                                                                                                                          | 17,205.30                     | 100.00%                            | 3                         | 3                        | 5                       | 18.50%                       |
| HF1 Repeat 1               | RP59 60S ribosomal protein S9                                                    | IP00021088                                                                                                                          | 22,273.50                     | 100.00%                            | 3                         | 3                        | 5                       | 18.50%                       |
| HF1 Repeat 1               | RP123 60S ribosomal protein L23                                                  | IP00001513,IP00742805,IP00795408                                                                                                    | 14,931.90                     | 99.70%                             | 2                         | 2                        | 2                       | 18.60%                       |
| HF1 Repeat 1               | ATP5B ATP synthase subunit beta, mitochondrial precursor                         | IP00381476                                                                                                                          | 56,545.20                     | 100.00%                            | 4                         | 4                        | 6                       | 11.70%                       |
| HF1 Repeat 1               | RP516 60S ribosomal protein S16                                                  | IP00021992                                                                                                                          | 16,422.90                     | 100.00%                            | 7                         | 7                        | 7                       | 33.60%                       |
| HF1 Repeat 1               | PRKDCB Protein kinase C, delta binding protein                                   | IP00056334                                                                                                                          | 27,682.80                     | 99.90%                             | 2                         | 2                        | 2                       | 10.20%                       |
| HF1 Repeat 1               | KRT5 Keratin, type I cytoskeletal 5                                              | IP00021027                                                                                                                          | 46,008.00                     | 100.00%                            | 4                         | 4                        | 7                       | 19.40%                       |
| HF1 Repeat 1               | CD44 Isoform 1 of CD44 antigen precursor                                         | IP00271760,IP00205064,IP00414465,IP00419219,IP00827658,IP00827795,IP00827917,IP00827982,IP00828055,IP00828064,IP00828117,IP00828192 | 75,926.60                     | 99.80%                             | 2                         | 2                        | 4                       | 3.04%                        |
| HF1 Repeat 1               | NT5 5'-nucleotidase precursor                                                    | IP00009456                                                                                                                          | 63,351.00                     | 100.00%                            | 7                         | 8                        | 18                      | 13.80%                       |
| HF1 Repeat 1               | NTR Keratin, type I cytoskeletal 9                                               | IP00021939                                                                                                                          | 22,515.550                    | 100.00%                            | 8                         | 8                        | 13                      | 18.10%                       |
| HF1 Repeat 1               | ATP5A1 ATP synthase subunit alpha, mitochondrial precursor                       | IP00410493                                                                                                                          | 59,714.10                     | 100.00%                            | 3                         | 3                        | 3                       | 7.05%                        |
| HF1 Repeat 1               | EMILIN1 Emilin 1 precursor                                                       | IP00013079                                                                                                                          | 126,679.70                    | 100.00%                            | 13                        | 13                       | 44                      | 16.00%                       |
| HF1 Repeat 1               | RP118 60S ribosomal protein L18                                                  | IP00021579                                                                                                                          | 21,617.20                     | 100.00%                            | 3                         | 3                        | 5                       | 20.20%                       |
| HF1 Repeat 1               | RP518 60S ribosomal protein S18                                                  | IP00013296                                                                                                                          | 17,701.30                     | 100.00%                            | 6                         | 6                        | 11                      | 38.20%                       |
| HF1 Repeat 1               | HST13CA Histone H2A family, member Y isoform 2                                   | IP00013366,IP00304571,IP00744448                                                                                                    | 15,648.80                     | 100.00%                            | 2                         | 2                        | 2                       | 7.40%                        |
| HF1 Repeat 1               | MDX2 Isoform 1 of Duchenne's muscular dystrophy protein 1 precursor              | IP00015005,IP00844146                                                                                                               | 62,684.30                     | 99.70%                             | 2                         | 2                        | 2                       | 3.30%                        |
| HF1 Repeat 1               | FBX12 F-box protein 12 precursor                                                 | IP00021087,IP00545558                                                                                                               | 13,131.90                     | 100.00%                            | 4                         | 4                        | 4                       | 6.58%                        |
| HF1 Repeat 1               | RP174 60S ribosomal protein L17a                                                 | IP00209973,IP00479315                                                                                                               | 29,978.30                     | 100.00%                            | 4                         | 4                        | 8                       | 15.40%                       |
| HF1 Repeat 1               | ANPEP Aminopeptidase N                                                           | IP00021224                                                                                                                          | 109,524.40                    | 100.00%                            | 16                        | 16                       | 25                      | 18.80%                       |
| HF1 Repeat 1               | ANKK6 Anker 6                                                                    | IP00002429,IP00212126                                                                                                               | 75,893.50                     | 100.00%                            | 11                        | 11                       | 14                      | 19.90%                       |
| HF1 Repeat 1               | VIM Vimentin                                                                     | IP00418471                                                                                                                          | 53,634.60                     | 100.00%                            | 19                        | 22                       | 75                      | 45.50%                       |
| HF1 Repeat 1               | COL5A1 alpha 1(V) collagen isoform 1 precursor                                   | IP00021200                                                                                                                          | 245,699.40                    | 100.00%                            | 64                        | 70                       | 159                     | 25.80%                       |
| HF1 Repeat 1               | VOCAC3 Isoform 1 of Voltage-dependent anion-selective channel protein 3          | IP00001804,IP00204977                                                                                                               | 36,771.10                     | 100.00%                            | 3                         | 3                        | 3                       | 19.40%                       |
| HF1 Repeat 1               | MORAS Matrix remodeling-associated protein precursor                             | IP00012347                                                                                                                          | 312,242.50                    | 100.00%                            | 9                         | 9                        | 20                      | 3.68%                        |
| HF1 Repeat 1               | HST13HE Histone H2A type 1-H, H2A family, member Y isoform 2                     | IP00413472                                                                                                                          | 15,349.70                     | 100.00%                            | 8                         | 9                        | 10                      | 68.00%                       |
| HF1 Repeat 1               | HST13HF Histone H2A type 1-H, H2A family, member Y isoform 1                     | IP00485070                                                                                                                          | 15,386.70                     | 100.00%                            | 8                         | 9                        | 71                      | 36.00%                       |
| HF1 Repeat 1               | TM91 TM91 isoform 2/Tropomyosin alpha 1 chain                                    | IP00216102,IP002296039,IP00743262                                                                                                   | 15,168.10                     | 100.00%                            | 4                         | 4                        | 7                       | 17.60%                       |
| HF1 Repeat 1               | COL1A2 Collagen alpha 2(I) chain precursor                                       | IP00349642                                                                                                                          | 129,270.60                    | 99.80%                             | 2                         | 2                        | 4                       | 1.90%                        |
| HF1 Repeat 1               | COL6A1 Collagen alpha 1(VI) chain precursor                                      | IP00291136                                                                                                                          | 108,512.90                    | 100.00%                            | 14                        | 15                       | 19                      | 13.40%                       |
| HF1 Repeat 1               | MPOH2H3 Isoform 3 of M-phase phosphoprotein 2                                    | IP00019502                                                                                                                          | 77                            | 100.00%                            | 77                        | 89                       | 413                     | 42.10%                       |
| HF1 Repeat 1               | ANKA2 Anker 2                                                                    | IP00418160,IP00545515                                                                                                               | 18,818.10                     | 100.00%                            | 4                         | 4                        | 4                       | 13.60%                       |
| HF1 Repeat 1               | COL1A1 Collagen alpha 1(I) chain precursor                                       | IP00297446                                                                                                                          | 138,830.40                    | 100.00%                            | 4                         | 4                        | 9                       | 3.42%                        |
| HF1 Repeat 1               | FN3 112 kDa protein                                                              | IP00784458                                                                                                                          | 312,297.00                    | 100.00%                            | 3                         | 3                        | 4                       | 0.94%                        |
| HF1 Repeat 1               | RP123 60S ribosomal protein L23                                                  | IP00001513,IP00742805,IP00795408                                                                                                    | 24,446.70                     | 99.90%                             | 2                         | 2                        | 7                       | 12.00%                       |
| HF1 Repeat 1               | RP2 60S ribosomal protein S2                                                     | IP00011480,IP00793166                                                                                                               | 15,421.20                     | 100.00%                            | 2                         | 2                        | 2                       | 7.81%                        |
| HF1 Repeat 1               | MF16 Isoform Non-muscle Myosin light polypeptide 6                               | IP00311518,IP00744444,IP00789601,IP00796166,IP00797005                                                                              | 18,481.20                     | 100.00%                            | 9                         | 11                       | 24                      | 60.50%                       |
| HF1 Repeat 1               | RP15A 60S ribosomal protein S15A                                                 | IP00021703                                                                                                                          | 13,181.90                     | 100.00%                            | 3                         | 3                        | 3                       | 11.80%                       |
| HF1 Repeat 1               | FLI1 Flotillin-1                                                                 | IP00027438                                                                                                                          | 47,338.80                     | 100.00%                            | 7                         | 8                        | 8                       | 21.50%                       |
| HF1 Repeat 1               | TGM2 Tissue glycoprotein 2                                                       | IP00204676                                                                                                                          | 77,311.10                     | 100.00%                            | 12                        | 12                       | 37                      | 20.80%                       |
| HF1 Repeat 1               | Tropin_Ssc troponin                                                              | MANK0000761                                                                                                                         | 24,199.30                     | 99.80%                             | 2                         | 2                        | 6                       | 13.00%                       |
| HF1 Repeat 1               | HST13H8 Histone H1.5                                                             | IP00217488                                                                                                                          | 22,565.70                     | 100.00%                            | 6                         | 6                        | 23                      | 27.90%                       |
| HF1 Repeat 1               | MNK2 Mnk2/kinase activator/inhibitor chain                                       | IP00019484,IP00220773,IP00604523                                                                                                    | 20,104.00                     | 100.00%                            | 4                         | 4                        | 15                      | 23.20%                       |
| HF1 Repeat 1               | HST13D Histone H1.3                                                              | IP00217467                                                                                                                          | 21,848.90                     | 100.00%                            | 7                         | 7                        | 31                      | 28.30%                       |
| HF1 Repeat 1               | RP11 Ductal-type 4 phosphatidylethanolamine transferase 67 kDa subunit precursor | IP00025874                                                                                                                          | 72,826.20                     | 100.00%                            | 3                         | 3                        | 3                       | 5.26%                        |
| HF1 Repeat 1               | HST13E Histone H2B type 1-E                                                      | IP00009862                                                                                                                          | 56,494.30                     | 100.0                              |                           |                          |                         |                              |

| Biological sample category | Gene symbol and protein name                                                                                                         | Protein accession numbers                                                                                                                                  | Protein molecular weight (Da) | Protein identification probability | Number of unique peptides | Number of unique spectra | Number of total spectra | Percentage sequence coverage |
|----------------------------|--------------------------------------------------------------------------------------------------------------------------------------|------------------------------------------------------------------------------------------------------------------------------------------------------------|-------------------------------|------------------------------------|---------------------------|--------------------------|-------------------------|------------------------------|
| HF# Repeat 2               | HS2C2 Basement membrane-specific heparan sulfate proteoglycan core protein precursor                                                 | IP00024394                                                                                                                                                 | 468,703.50                    | 100.00%                            | 35                        | 38                       | 104                     | 10.30%                       |
| HF# Repeat 2               | HBA2 HBA1 Hemoglobin subunit alpha                                                                                                   | IP00410714,IP00853688                                                                                                                                      | 15,262.60                     | 100.00%                            | 4                         | 5                        | 23                      | 34.50%                       |
| HF# Repeat 2               | COL6A2 Isoform 2C2 of Collagen alpha 2(VI) chain precursor                                                                           | IP00304840                                                                                                                                                 | 108,562.80                    | 100.00%                            | 14                        | 14                       | 23                      | 14.00%                       |
| HF# Repeat 2               | THN1 Thn 1 membrane glycoprotein precursor                                                                                           | IP00022892,IP00555777                                                                                                                                      | 15,885.70                     | 99.80%                             | 2                         | 2                        | 3                       | 17.00%                       |
| HF# Repeat 2               | EFT1A1 Elongation factor 1 alpha 1                                                                                                   | IP00364645,IP00427274                                                                                                                                      | 50,167.40                     | 99.80%                             | 2                         | 2                        | 9                       | 4.11%                        |
| HF# Repeat 2               | H2AFV Histone H2AV                                                                                                                   | IP00062879,IP00218448,IP00555841                                                                                                                           | 15,470.10                     | 99.80%                             | 2                         | 2                        | 4                       | 22.00%                       |
| HF# Repeat 2               | FBN2 Fibrin 2 precursor                                                                                                              | IP00019439,IP00769115                                                                                                                                      | 216,213.50                    | 99.80%                             | 2                         | 2                        | 3                       | 1.17%                        |
| HF# Repeat 2               | TGFB1 Transforming growth factor beta induced protein 1-h3 precursor                                                                 | IP00018218                                                                                                                                                 | 74,668.90                     | 100.00%                            | 11                        | 11                       | 33                      | 18.70%                       |
| HF# Repeat 2               | HST1H2BL Histone H2B type 1.L                                                                                                        | IP00018534,IP00202011,IP00152306,IP00303133,IP00329665,IP00419933,IP00477495,IP00554798,IP00704466,IP00816522                                              | 17,827.20                     | 100.00%                            | 11                        | 11                       | 44                      | 56.30%                       |
| HF# Repeat 2               | TMEM43 Transmembrane protein 43                                                                                                      | IP00312280                                                                                                                                                 | 44,858.80                     | 100.00%                            | 3                         | 3                        | 4                       | 11.50%                       |
| HF# Repeat 2               | VOC1 Voltage-dependent anion-selective channel protein 1                                                                             | IP00214308                                                                                                                                                 | 30,755.90                     | 100.00%                            | 4                         | 4                        | 6                       | 14.50%                       |
| HF# Repeat 2               | VOC2 Voltage-dependent anion-selective channel protein 2                                                                             | IP00021445,IP00216624,IP00216626,IP00455311,IP008574,IP00859373                                                                                            | 25,274.50                     | 100.00%                            | 3                         | 3                        | 4                       | 13.90%                       |
| HF# Repeat 2               | EUKND Isoform 1 of Erln 2 precursor                                                                                                  | IP00200842                                                                                                                                                 | 17,922.40                     | 99.80%                             | 2                         | 2                        | 6                       | 7.08%                        |
| HF# Repeat 2               | NID2 Nitrogen 2 precursor                                                                                                            | IP00029008,IP00309333                                                                                                                                      | 107,123.60                    | 99.80%                             | 4                         | 4                        | 5                       | 4.64%                        |
| HF# Repeat 2               | RL11 Isoform 1 of 60S ribosomal protein L11                                                                                          | IP00137478,IP00274638                                                                                                                                      | 26,107.10                     | 99.80%                             | 2                         | 2                        | 2                       | 13.00%                       |
| HF# Repeat 2               | EIF2M2 EGF-containing Fibulin like extracellular matrix protein 2 precursor                                                          | IP00026608,IP00256657                                                                                                                                      | 67,737.30                     | 99.80%                             | 2                         | 2                        | 2                       | 3.66%                        |
| HF# Repeat 2               | TNC Tricorin 1 of Tricorin precursor                                                                                                 | IP00011008                                                                                                                                                 | 240,845.20                    | 100.00%                            | 16                        | 16                       | 80                      | 38.00%                       |
| HF# Repeat 2               | HSB1 Heat shock protein beta-1                                                                                                       | IP00021512                                                                                                                                                 | 22,764.60                     | 100.00%                            | 4                         | 4                        | 5                       | 21.50%                       |
| HF# Repeat 2               | RP124 60S ribosomal protein L24                                                                                                      | IP00308332,IP00279142,IP00739366                                                                                                                           | 19,782.50                     | 99.80%                             | 2                         | 2                        | 4                       | 13.10%                       |
| HF# Repeat 2               | KRT2 Keratin, type II cytoskeletal 2 epidermal                                                                                       | IP00021304                                                                                                                                                 | 65,848.40                     | 100.00%                            | 3                         | 3                        | 4                       | 8.51%                        |
| HF# Repeat 2               | RP13 60S ribosomal protein S13                                                                                                       | IP00221089                                                                                                                                                 | 17,205.30                     | 99.80%                             | 2                         | 2                        | 5                       | 8.61%                        |
| HF# Repeat 2               | RP9 60S ribosomal protein S9                                                                                                         | IP00221088                                                                                                                                                 | 22,274.50                     | 100.00%                            | 3                         | 3                        | 4                       | 13.90%                       |
| HF# Repeat 2               | RP13 60S ribosomal protein L13                                                                                                       | IP00019153,IP00242805,IP002795408                                                                                                                          | 14,931.90                     | 100.00%                            | 2                         | 2                        | 2                       | 18.60%                       |
| HF# Repeat 2               | ATP5F ATP synthase subunit beta, mitochondrial precursor                                                                             | IP00289476                                                                                                                                                 | 35,542.50                     | 100.00%                            | 4                         | 4                        | 5                       | 9.85%                        |
| HF# Repeat 2               | RP16 60S ribosomal protein S16                                                                                                       | IP00221092                                                                                                                                                 | 16,427.90                     | 99.80%                             | 2                         | 2                        | 3                       | 8.23%                        |
| HF# Repeat 2               | KRT1 Keratin, type I cytoskeletal 1                                                                                                  | IP00220327                                                                                                                                                 | 66,001.20                     | 100.00%                            | 11                        | 11                       | 40                      | 19.30%                       |
| HF# Repeat 2               | CD44 Isoform 1 of CD44 antigen precursor                                                                                             | IP00297160,IP002080564,IP00419465,IP00419219,IP00827650,IP00276558,IP00827795,IP00827893,IP00827937,IP00827982,IP00828056,IP00828054,IP00828117,IP00828192 | 66,213.00                     | 99.80%                             | 2                         | 2                        | 5                       | 5.88%                        |
| HF# Repeat 2               | NTE5 5-nucleotidase precursor                                                                                                        | IP00009456                                                                                                                                                 | 63,351.00                     | 100.00%                            | 8                         | 8                        | 11                      | 14.50%                       |
| HF# Repeat 2               | KRT9 Keratin, type I cytoskeletal 9                                                                                                  | IP00203959                                                                                                                                                 | 62,123.00                     | 100.00%                            | 2                         | 2                        | 25                      | 23.40%                       |
| HF# Repeat 2               | ATP5A1 ATP synthase subunit alpha, mitochondrial precursor                                                                           | IP00404993                                                                                                                                                 | 59,734.10                     | 100.00%                            | 3                         | 3                        | 3                       | 6.89%                        |
| HF# Repeat 2               | EMLN1 EMLIN 1 precursor                                                                                                              | IP00013079                                                                                                                                                 | 106,674.30                    | 100.00%                            | 16                        | 16                       | 34                      | 18.90%                       |
| HF# Repeat 2               | RP18 60S ribosomal protein L18                                                                                                       | IP00211578                                                                                                                                                 | 15,647.20                     | 99.80%                             | 2                         | 2                        | 3                       | 13.30%                       |
| HF# Repeat 2               | RP18 60S ribosomal protein S18                                                                                                       | IP00013296                                                                                                                                                 | 17,701.30                     | 99.80%                             | 5                         | 5                        | 9                       | 25.00%                       |
| HF# Repeat 2               | H2AFY H2A histone family, member Y isoform 2                                                                                         | IP00059366,IP00304771,IP00704148                                                                                                                           | 18,160.00                     | 100.00%                            | 6                         | 6                        | 15                      | 19.20%                       |
| HF# Repeat 2               | FBN2 Fibrin 2 precursor                                                                                                              | IP00021824,IP00465038                                                                                                                                      | 111,840.50                    | 100.00%                            | 6                         | 6                        | 29                      | 5.04%                        |
| HF# Repeat 2               | RP17A 60S ribosomal protein L7a                                                                                                      | IP00299573,IP00479315                                                                                                                                      | 29,979.30                     | 100.00%                            | 4                         | 4                        | 5                       | 19.20%                       |
| HF# Repeat 2               | ANKK1 Ankyrin 1                                                                                                                      | IP00211224                                                                                                                                                 | 109,514.40                    | 100.00%                            | 17                        | 17                       | 33                      | 18.80%                       |
| HF# Repeat 2               | ANKK6 Ankyrin 6                                                                                                                      | IP00024459,IP002021226                                                                                                                                     | 74,859.50                     | 100.00%                            | 13                        | 13                       | 17                      | 26.00%                       |
| HF# Repeat 2               | VIM Vimentin 1                                                                                                                       | IP00418473                                                                                                                                                 | 51,638.40                     | 100.00%                            | 14                        | 14                       | 22                      | 32.80%                       |
| HF# Repeat 2               | COL6A3 alpha 3 Type VI collagen isoform 1 precursor                                                                                  | IP00022200                                                                                                                                                 | 343,649.40                    | 100.00%                            | 65                        | 65                       | 193                     | 25.40%                       |
| HF# Repeat 2               | RP17A 60S ribosomal protein L7a                                                                                                      | IP00399130,IP00456758,IP00827619                                                                                                                           | 16,412.20                     | 99.80%                             | 2                         | 2                        | 8                       | 8.84%                        |
| HF# Repeat 2               | ADM2L1 ADM2L1 precursor                                                                                                              | IP00029088                                                                                                                                                 | 35,319.70                     | 100.00%                            | 2                         | 2                        | 3                       | 3.30%                        |
| HF# Repeat 2               | VOC3 Isoform 1 of Voltage-dependent anion-selective channel protein 3                                                                | IP00013384,IP00284739                                                                                                                                      | 39,381.80                     | 100.00%                            | 3                         | 3                        | 3                       | 19.00%                       |
| HF# Repeat 2               | RP16 60S ribosomal protein S16                                                                                                       | IP00012772                                                                                                                                                 | 16,427.90                     | 99.80%                             | 2                         | 2                        | 2                       | 10.00%                       |
| HF# Repeat 2               | MORAS Matrix-remodelling-associated protein 5 precursor                                                                              | IP00012347                                                                                                                                                 | 312,262.50                    | 100.00%                            | 8                         | 8                        | 18                      | 3.61%                        |
| HF# Repeat 2               | HST1H4F_HST1H2H4F_HST1H4L_HST1H4L_HST1H4H_HST1H4H_HST1H4K_HST1H4D_HST1H4E_HST1H4C_HST1H4H_HST1H4E_HST1H4B_HST1H4H_HST1H4H_Histone H4 | IP00453473                                                                                                                                                 | 11,349.70                     | 100.00%                            | 12                        | 15                       | 168                     | 68.00%                       |
| HF# Repeat 2               | GNA2 Guanine nucleotide-binding protein G12, alpha-2 subunit                                                                         | IP00409215,IP00074845                                                                                                                                      | 46,413.00                     | 99.80%                             | 2                         | 2                        | 47                      | 13.00%                       |
| HF# Repeat 2               | HST1H4F_HST1H4F_HST1H4L_HST1H4L_HST1H4B_HST1H4L_HST1H4K_HST1H4D_HST1H4E_HST1H4C_HST1H4H_HST1H4E_HST1H4B_HST1H4H_Histone H3.1         | IP00455070                                                                                                                                                 | 15,386.70                     | 100.00%                            | 8                         | 9                        | 66                      | 36.00%                       |
| HF# Repeat 2               | TFR1 Transmembrane alpha 1 chain precursor                                                                                           | IP00216520,IP00269639,IP00743225                                                                                                                           | 121,082.10                    | 100.00%                            | 16                        | 16                       | 37                      | 31.00%                       |
| HF# Repeat 2               | COL6A1 Collagen alpha 1(VI) chain precursor                                                                                          | IP00201136                                                                                                                                                 | 108,512.90                    | 100.00%                            | 16                        | 17                       | 31                      | 15.70%                       |
| HF# Repeat 2               | MMP9 Matrilysin 9                                                                                                                    | IP00019520                                                                                                                                                 | 228,538.50                    | 100.00%                            | 65                        | 76                       | 323                     | 38.00%                       |
| HF# Repeat 2               | ANKK2 Ankyrin 2                                                                                                                      | IP00418468,IP00455115                                                                                                                                      | 55,888.10                     | 100.00%                            | 2                         | 2                        | 6                       | 6.00%                        |
| HF# Repeat 2               | COL1A1 Collagen alpha 1(I) chain precursor                                                                                           | IP00297046                                                                                                                                                 | 138,893.40                    | 100.00%                            | 2                         | 2                        | 3                       | 2.40%                        |
| HF# Repeat 2               | AMP2A Actin-related protein 2/3 complex subunit 2                                                                                    | IP00000511                                                                                                                                                 | 20,165.70                     | 99.80%                             | 2                         | 2                        | 2                       | 6.00%                        |
| HF# Repeat 2               | FBN1 FBN1 protein                                                                                                                    | IP00704458                                                                                                                                                 | 332,207.00                    | 100.00%                            | 3                         | 3                        | 11                      | 0.94%                        |
| HF# Repeat 2               | RP1 60S ribosomal protein L1                                                                                                         | IP00030179,IP000144171,IP00417271,IP00704746                                                                                                               | 24,446.70                     | 99.80%                             | 2                         | 2                        | 8                       | 10.40%                       |
| HF# Repeat 2               | MP14 Isoform Non-muscle of Myosin light polypeptide 6                                                                                | IP00315168,IP002744444,IP00706768,IP00796346,IP00797003                                                                                                    | 18,481.20                     | 100.00%                            | 3                         | 3                        | 3                       | 40.00%                       |
| HF# Repeat 2               | RP5A4 60S ribosomal protein S4, isoform                                                                                              | IP00217030                                                                                                                                                 | 29,581.30                     | 100.00%                            | 2                         | 2                        | 8                       | 7.23%                        |
| HF# Repeat 2               | FLG1 Flottillin 1                                                                                                                    | IP00202748                                                                                                                                                 | 47,738.60                     | 100.00%                            | 8                         | 8                        | 20                      | 20.60%                       |
| HF# Repeat 2               | TGM2 Isoform 1 of Protein glutamine gamma-glutamyltransferase 2                                                                      | IP00204578                                                                                                                                                 | 77,311.10                     | 100.00%                            | 8                         | 8                        | 16                      | 11.50%                       |
| HF# Repeat 2               | AMP2A Actin-related protein 2/3 complex subunit 4                                                                                    | IP00548111,IP002744414                                                                                                                                     | 19,470.00                     | 99.80%                             | 2                         | 2                        | 3                       | 11.40%                       |
| HF# Repeat 2               | Trp101 - Src src(PT) IgK                                                                                                             | MAN0000761                                                                                                                                                 | 19,319.30                     | 99.80%                             | 2                         | 2                        | 47                      | 31.00%                       |
| HF# Repeat 2               | HST1H2E Histone H1.5                                                                                                                 | IP00217488                                                                                                                                                 | 22,565.70                     | 100.00%                            | 6                         | 6                        | 21                      | 22.40%                       |
| HF# Repeat 2               | MRE11 Mre11 tumor suppressor 1p36                                                                                                    | IP00019496,IP00020573,IP006004523                                                                                                                          | 120,000.00                    | 100.00%                            | 6                         | 6                        | 18                      | 28.80%                       |
| HF# Repeat 2               | HST1H2E Histone H1.3                                                                                                                 | IP00217466,IP00217467                                                                                                                                      | 21,848.90                     | 100.00%                            | 6                         | 6                        | 29                      | 22.80%                       |
| HF# Repeat 2               | RP11 Galactin-3-binding lectin-4-like protein-1 precursor                                                                            | IP000025874                                                                                                                                                | 72,762.00                     | 100.00%                            | 3                         | 3                        | 3                       | 5.11%                        |
| HF# Repeat 2               | KRT10 Keratin, type I cytoskeletal 10                                                                                                | IP00000862                                                                                                                                                 | 52,592.00                     | 99.80%                             | 4                         | 4                        | 7                       | 7.25%                        |
| HF# Repeat 2               | MOR Maspin                                                                                                                           | IP00219395                                                                                                                                                 | 67,803.80                     | 99.80%                             | 2                         | 2                        | 3                       | 3.29%                        |
| HF# Repeat 2               | MPTC1 Mucin 1                                                                                                                        | IP00019418,IP00474351,IP00800992                                                                                                                           | 115,615.60                    | 100.00%                            | 8                         | 8                        | 16                      | 8.24%                        |
| HF# Repeat 2               | RP125 60S ribosomal protein S25                                                                                                      | IP00012750,IP00401105,IP00478694                                                                                                                           | 15,570.90                     | 99.80%                             | 2                         | 2                        | 6                       | 15.80%                       |
| HF# Repeat 2               | RP16 60S ribosomal protein L16                                                                                                       | IP00293898,IP00790542,IP008087533                                                                                                                          | 32,725.20                     | 100.00%                            | 4                         | 4                        | 5                       | 12.50%                       |
| HF# Repeat 2               | RP14 60S ribosomal protein L14                                                                                                       | IP00003918                                                                                                                                                 | 45,681.10                     | 100.00%                            | 5                         | 5                        | 7                       | 4.88%                        |
| HF# Repeat 2               | RP14 60S ribosomal protein S14                                                                                                       | IP00025271                                                                                                                                                 | 16,254.90                     | 99.80%                             | 2                         | 2                        | 2                       | 17.90%                       |
| HF# Repeat 2               | HST1H2AF Histone H2A type 1-F                                                                                                        | IP00819336,IP00102165,IP00216457,IP00222065,IP00253316,IP00291764,IP00339374,IP00552873                                                                    | 17,818.80                     | 100.00%                            | 5                         | 5                        | 52                      | 36.70%                       |
| HF# Repeat 2               | STOM Erythrocyte band 7 integral membrane protein                                                                                    | IP00219682                                                                                                                                                 | 31,714.10                     | 100.00%                            | 5                         | 5                        | 10                      | 18.40%                       |
| HF# Repeat 2               | FBN1 Isoform B of Fibrin 1 precursor                                                                                                 | IP00218803,IP00269514                                                                                                                                      | 77,240.80                     | 100.00%                            | 4                         | 4                        | 8                       | 5.81%                        |
| HF# Repeat 2               | MUC1 Mucin 1 precursor                                                                                                               | IP00219718                                                                                                                                                 | 318,388.20                    | 99.90%                             | 2                         | 2                        | 2                       | 1.99%                        |
| HF# Repeat 2               | FLG2 Flottillin 2                                                                                                                    | IP00709008                                                                                                                                                 | 47,048.90                     | 100.00%                            | 4                         | 4                        | 5                       | 11.20%                       |
| HF# Repeat 2               | HST1H2E Histone H2B type 2 E                                                                                                         | IP00003935,IP00152761,IP00212040,IP00515061                                                                                                                | 11,886.70                     | 99.80%                             | 2                         | 2                        | 11                      | 54.80%                       |
| HF# Repeat 2               | RP110A 60S ribosomal protein L10a                                                                                                    | IP00412579,IP00827508                                                                                                                                      | 24,682.80                     | 99.80%                             | 2                         | 3                        | 3                       | 6.02%                        |
| HF# Repeat 2               | RP27A UBR1 UBR ubiquitin and ribosomal protein S27a precursor                                                                        | IP00271930                                                                                                                                                 | 17,947.60                     | 100.00%                            | 8                         | 9                        | 29                      | 42.00%                       |
| HF# Repeat 2               | Serum albumin precursor                                                                                                              | IP00078988                                                                                                                                                 | 66,278.20                     | 100.00%                            | 10                        | 11                       | 18                      | 16.30%                       |
| HF# Repeat 2               | CKAN4 Isoform 1 of Cytoskeleton-associated protein 4                                                                                 | IP00413138,IP004033214,IP00604713                                                                                                                          | 67,800.60                     | 100.00%                            | 8                         | 8                        | 10                      | 29.20%                       |
| HF# Repeat 2               | RP15 60S ribosomal protein S15                                                                                                       | IP00011253                                                                                                                                                 | 26,670.50                     | 100.00%                            | 3                         | 3                        | 3                       | 16.00%                       |
| HF# Repeat 2               | MTH10 Isoform 1 of Myosin-10                                                                                                         | IP00397552,IP00479307,IP00705053                                                                                                                           | 231,296.70                    | 100.00%                            | 11                        | 11                       | 16                      | 11.10%                       |
| HF# Repeat 2               | DDOST Dolichyl dolichol synthetase/cholesterol-transferase precursor                                                                 | IP00297084                                                                                                                                                 | 56,794.50                     | 99.70%                             | 2                         | 2                        | 2                       | 4.82%                        |
| HF# Repeat 2               | ACTB Actin, cytoplasmic 1                                                                                                            | IP00021439,IP003021440,IP00848058                                                                                                                          | 42,064.70                     | 100.00%                            | 20                        | 27                       | 176                     | 39.00%                       |
| HF# Repeat 2               | TUBA1B Tubulin alpha 1B chain                                                                                                        | IP00387744,IP002792977,IP00869501                                                                                                                          | 49,622.10                     | 100.00%                            | 8                         | 8                        | 21                      | 25.30%                       |
| HF# Repeat 2               | TUBB1 Tubulin beta chain                                                                                                             | IP00011054                                                                                                                                                 | 49,625.60                     | 100.00%                            | 9                         | 9                        | 26                      | 22.50%                       |
| HF# Repeat 2               | FN1 Fibronectin 1 isoform 4 prepolymer                                                                                               | IP00414283                                                                                                                                                 | 256,486.40                    | 100.00%                            | 44                        | 56                       | 545                     | 25.90%                       |
| HF# Repeat 2               | ACTC1 Actin, alpha cardiac muscle 1                                                                                                  | IP00021806                                                                                                                                                 | 42,002.10                     | 100.00%                            | 3                         | 4                        | 10                      | 39.50%                       |
| HF# Repeat 2               | MHC Nanospectrin                                                                                                                     | IP00417063                                                                                                                                                 | 25,499.00                     | 99.80%                             | 2                         | 2                        | 3                       | 2.67%                        |
| HF# Repeat 3               | HBA2 HBA1 Hemoglobin subunit alpha                                                                                                   | IP00410714,IP00853688                                                                                                                                      | 15,262.60                     | 100.00%                            | 3                         | 3                        | 44                      | 23.30%                       |
| HF# Repeat 3               | COL6A2 Isoform 2C2 of Collagen alpha 2(VI) chain precursor                                                                           | IP00304840                                                                                                                                                 | 108,562.80                    | 100.00%                            | 13                        | 13                       | 34                      | 14.30%                       |
| HF# Repeat 3               | RP127 60S ribosomal protein L27                                                                                                      | IP00219155,IP00382885                                                                                                                                      | 19,899.20                     | 99.80%                             | 2                         | 2                        | 4                       | 14.30%                       |
| HF# Repeat 3               | TGFB1 Transforming growth factor beta induced protein (h3) precursor                                                                 | IP00018218                                                                                                                                                 | 74,668.90                     | 100.00%                            | 13                        | 13                       | 28                      | 21.10%                       |
| HF# Repeat 3               | HST1H2BL Histone H2B type 1.L                                                                                                        | IP00018534,IP00202011,IP00152306,IP00303133,IP00329666,IP00419933,IP00477495,IP00554798,IP00704466,IP00816522                                              | 17,827.20                     | 99.70%                             | 2                         | 2                        | 4                       | 15.90%                       |
| HF# Repeat 3               | DFF1 Dermatan sulfate precursor                                                                                                      | IP00221320                                                                                                                                                 | 21,986.70                     | 99.70%                             | 2                         | 2                        | 3                       | 9.61%                        |
| HF# Repeat 3               | TNC Tricorin                                                                                                                         | IP00011008                                                                                                                                                 | 240,845.20                    | 100.00%                            | 22                        | 23                       | 51                      | 9.72%                        |
| HF# Repeat 3               | KRT2 Keratin, type II cytoskeletal 2 epidermal                                                                                       | IP00021304                                                                                                                                                 | 65,848.40                     | 100.00%                            | 5                         | 5                        |                         |                              |

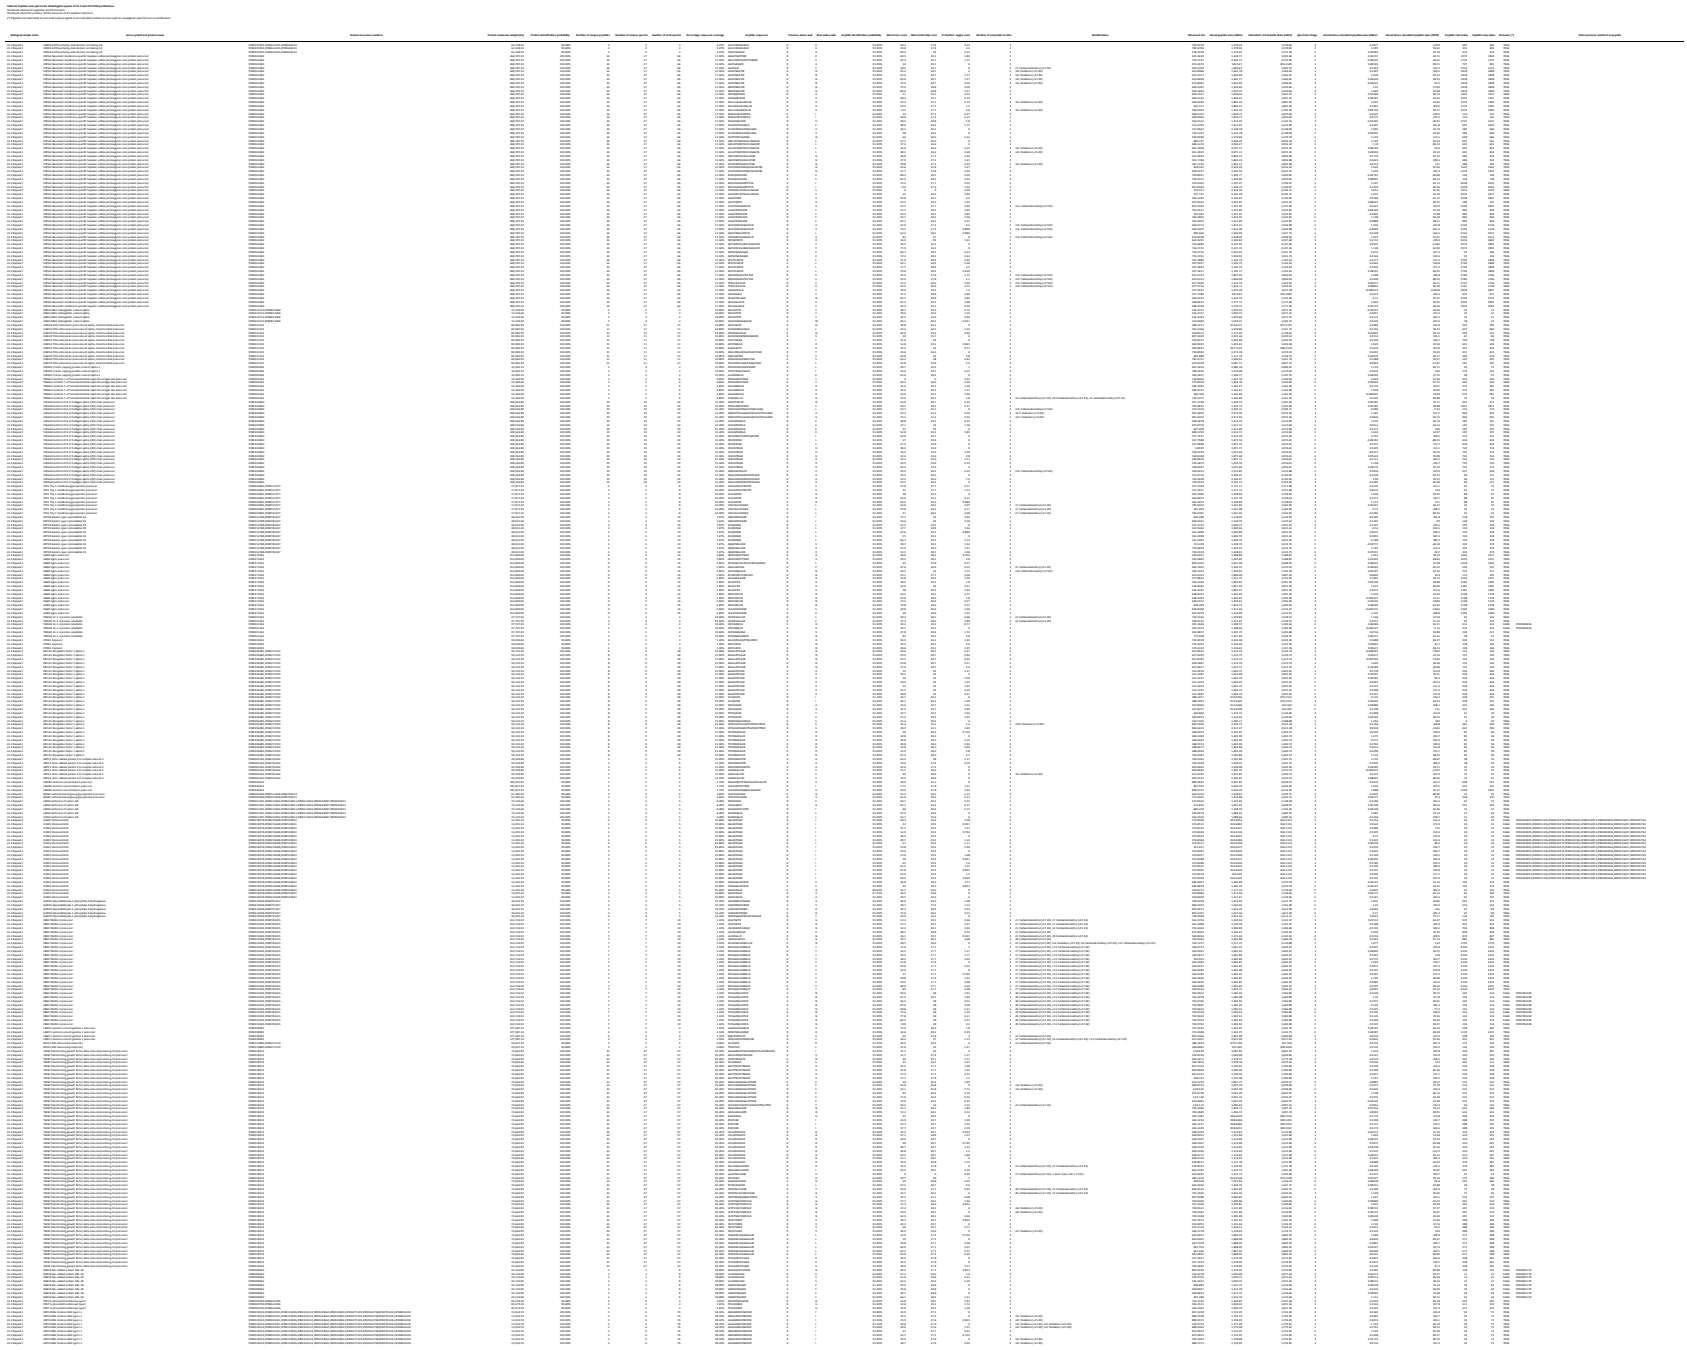

Table with multiple columns and rows, containing dense text and data. The table is oriented vertically on the page. The columns are labeled with various identifiers and the rows contain detailed information. The table is partially obscured by a large, faint watermark or ghosting of text from the reverse side of the page.

Table with multiple columns and rows, containing dense text and data. The table is oriented vertically on the page.



Table with multiple columns and rows, containing dense text and data. The table is oriented vertically on the page.

| Item No. | Description | Quantity | Unit | Rate | Total |
|----------|-------------|----------|------|------|-------|
| 1        | ...         | ...      | ...  | ...  | ...   |
| 2        | ...         | ...      | ...  | ...  | ...   |
| 3        | ...         | ...      | ...  | ...  | ...   |
| 4        | ...         | ...      | ...  | ...  | ...   |
| 5        | ...         | ...      | ...  | ...  | ...   |
| 6        | ...         | ...      | ...  | ...  | ...   |
| 7        | ...         | ...      | ...  | ...  | ...   |
| 8        | ...         | ...      | ...  | ...  | ...   |
| 9        | ...         | ...      | ...  | ...  | ...   |
| 10       | ...         | ...      | ...  | ...  | ...   |
| 11       | ...         | ...      | ...  | ...  | ...   |
| 12       | ...         | ...      | ...  | ...  | ...   |
| 13       | ...         | ...      | ...  | ...  | ...   |
| 14       | ...         | ...      | ...  | ...  | ...   |
| 15       | ...         | ...      | ...  | ...  | ...   |
| 16       | ...         | ...      | ...  | ...  | ...   |
| 17       | ...         | ...      | ...  | ...  | ...   |
| 18       | ...         | ...      | ...  | ...  | ...   |
| 19       | ...         | ...      | ...  | ...  | ...   |
| 20       | ...         | ...      | ...  | ...  | ...   |
| 21       | ...         | ...      | ...  | ...  | ...   |
| 22       | ...         | ...      | ...  | ...  | ...   |
| 23       | ...         | ...      | ...  | ...  | ...   |
| 24       | ...         | ...      | ...  | ...  | ...   |
| 25       | ...         | ...      | ...  | ...  | ...   |
| 26       | ...         | ...      | ...  | ...  | ...   |
| 27       | ...         | ...      | ...  | ...  | ...   |
| 28       | ...         | ...      | ...  | ...  | ...   |
| 29       | ...         | ...      | ...  | ...  | ...   |
| 30       | ...         | ...      | ...  | ...  | ...   |
| 31       | ...         | ...      | ...  | ...  | ...   |
| 32       | ...         | ...      | ...  | ...  | ...   |
| 33       | ...         | ...      | ...  | ...  | ...   |
| 34       | ...         | ...      | ...  | ...  | ...   |
| 35       | ...         | ...      | ...  | ...  | ...   |
| 36       | ...         | ...      | ...  | ...  | ...   |
| 37       | ...         | ...      | ...  | ...  | ...   |
| 38       | ...         | ...      | ...  | ...  | ...   |
| 39       | ...         | ...      | ...  | ...  | ...   |
| 40       | ...         | ...      | ...  | ...  | ...   |
| 41       | ...         | ...      | ...  | ...  | ...   |
| 42       | ...         | ...      | ...  | ...  | ...   |
| 43       | ...         | ...      | ...  | ...  | ...   |
| 44       | ...         | ...      | ...  | ...  | ...   |
| 45       | ...         | ...      | ...  | ...  | ...   |
| 46       | ...         | ...      | ...  | ...  | ...   |
| 47       | ...         | ...      | ...  | ...  | ...   |
| 48       | ...         | ...      | ...  | ...  | ...   |
| 49       | ...         | ...      | ...  | ...  | ...   |
| 50       | ...         | ...      | ...  | ...  | ...   |
| 51       | ...         | ...      | ...  | ...  | ...   |
| 52       | ...         | ...      | ...  | ...  | ...   |
| 53       | ...         | ...      | ...  | ...  | ...   |
| 54       | ...         | ...      | ...  | ...  | ...   |
| 55       | ...         | ...      | ...  | ...  | ...   |
| 56       | ...         | ...      | ...  | ...  | ...   |
| 57       | ...         | ...      | ...  | ...  | ...   |
| 58       | ...         | ...      | ...  | ...  | ...   |
| 59       | ...         | ...      | ...  | ...  | ...   |
| 60       | ...         | ...      | ...  | ...  | ...   |
| 61       | ...         | ...      | ...  | ...  | ...   |
| 62       | ...         | ...      | ...  | ...  | ...   |
| 63       | ...         | ...      | ...  | ...  | ...   |
| 64       | ...         | ...      | ...  | ...  | ...   |
| 65       | ...         | ...      | ...  | ...  | ...   |
| 66       | ...         | ...      | ...  | ...  | ...   |
| 67       | ...         | ...      | ...  | ...  | ...   |
| 68       | ...         | ...      | ...  | ...  | ...   |
| 69       | ...         | ...      | ...  | ...  | ...   |
| 70       | ...         | ...      | ...  | ...  | ...   |
| 71       | ...         | ...      | ...  | ...  | ...   |
| 72       | ...         | ...      | ...  | ...  | ...   |
| 73       | ...         | ...      | ...  | ...  | ...   |
| 74       | ...         | ...      | ...  | ...  | ...   |
| 75       | ...         | ...      | ...  | ...  | ...   |
| 76       | ...         | ...      | ...  | ...  | ...   |
| 77       | ...         | ...      | ...  | ...  | ...   |
| 78       | ...         | ...      | ...  | ...  | ...   |
| 79       | ...         | ...      | ...  | ...  | ...   |
| 80       | ...         | ...      | ...  | ...  | ...   |
| 81       | ...         | ...      | ...  | ...  | ...   |
| 82       | ...         | ...      | ...  | ...  | ...   |
| 83       | ...         | ...      | ...  | ...  | ...   |
| 84       | ...         | ...      | ...  | ...  | ...   |
| 85       | ...         | ...      | ...  | ...  | ...   |
| 86       | ...         | ...      | ...  | ...  | ...   |
| 87       | ...         | ...      | ...  | ...  | ...   |
| 88       | ...         | ...      | ...  | ...  | ...   |
| 89       | ...         | ...      | ...  | ...  | ...   |
| 90       | ...         | ...      | ...  | ...  | ...   |
| 91       | ...         | ...      | ...  | ...  | ...   |
| 92       | ...         | ...      | ...  | ...  | ...   |
| 93       | ...         | ...      | ...  | ...  | ...   |
| 94       | ...         | ...      | ...  | ...  | ...   |
| 95       | ...         | ...      | ...  | ...  | ...   |
| 96       | ...         | ...      | ...  | ...  | ...   |
| 97       | ...         | ...      | ...  | ...  | ...   |
| 98       | ...         | ...      | ...  | ...  | ...   |
| 99       | ...         | ...      | ...  | ...  | ...   |
| 100      | ...         | ...      | ...  | ...  | ...   |

| Item No. | Description | Quantity | Unit | Rate | Total |
|----------|-------------|----------|------|------|-------|
| 1        | ...         | ...      | ...  | ...  | ...   |
| 2        | ...         | ...      | ...  | ...  | ...   |
| 3        | ...         | ...      | ...  | ...  | ...   |
| 4        | ...         | ...      | ...  | ...  | ...   |
| 5        | ...         | ...      | ...  | ...  | ...   |
| 6        | ...         | ...      | ...  | ...  | ...   |
| 7        | ...         | ...      | ...  | ...  | ...   |
| 8        | ...         | ...      | ...  | ...  | ...   |
| 9        | ...         | ...      | ...  | ...  | ...   |
| 10       | ...         | ...      | ...  | ...  | ...   |
| 11       | ...         | ...      | ...  | ...  | ...   |
| 12       | ...         | ...      | ...  | ...  | ...   |
| 13       | ...         | ...      | ...  | ...  | ...   |
| 14       | ...         | ...      | ...  | ...  | ...   |
| 15       | ...         | ...      | ...  | ...  | ...   |
| 16       | ...         | ...      | ...  | ...  | ...   |
| 17       | ...         | ...      | ...  | ...  | ...   |
| 18       | ...         | ...      | ...  | ...  | ...   |
| 19       | ...         | ...      | ...  | ...  | ...   |
| 20       | ...         | ...      | ...  | ...  | ...   |
| 21       | ...         | ...      | ...  | ...  | ...   |
| 22       | ...         | ...      | ...  | ...  | ...   |
| 23       | ...         | ...      | ...  | ...  | ...   |
| 24       | ...         | ...      | ...  | ...  | ...   |
| 25       | ...         | ...      | ...  | ...  | ...   |
| 26       | ...         | ...      | ...  | ...  | ...   |
| 27       | ...         | ...      | ...  | ...  | ...   |
| 28       | ...         | ...      | ...  | ...  | ...   |
| 29       | ...         | ...      | ...  | ...  | ...   |
| 30       | ...         | ...      | ...  | ...  | ...   |
| 31       | ...         | ...      | ...  | ...  | ...   |
| 32       | ...         | ...      | ...  | ...  | ...   |
| 33       | ...         | ...      | ...  | ...  | ...   |
| 34       | ...         | ...      | ...  | ...  | ...   |
| 35       | ...         | ...      | ...  | ...  | ...   |
| 36       | ...         | ...      | ...  | ...  | ...   |
| 37       | ...         | ...      | ...  | ...  | ...   |
| 38       | ...         | ...      | ...  | ...  | ...   |
| 39       | ...         | ...      | ...  | ...  | ...   |
| 40       | ...         | ...      | ...  | ...  | ...   |
| 41       | ...         | ...      | ...  | ...  | ...   |
| 42       | ...         | ...      | ...  | ...  | ...   |
| 43       | ...         | ...      | ...  | ...  | ...   |
| 44       | ...         | ...      | ...  | ...  | ...   |
| 45       | ...         | ...      | ...  | ...  | ...   |
| 46       | ...         | ...      | ...  | ...  | ...   |
| 47       | ...         | ...      | ...  | ...  | ...   |
| 48       | ...         | ...      | ...  | ...  | ...   |
| 49       | ...         | ...      | ...  | ...  | ...   |
| 50       | ...         | ...      | ...  | ...  | ...   |
| 51       | ...         | ...      | ...  | ...  | ...   |
| 52       | ...         | ...      | ...  | ...  | ...   |
| 53       | ...         | ...      | ...  | ...  | ...   |
| 54       | ...         | ...      | ...  | ...  | ...   |
| 55       | ...         | ...      | ...  | ...  | ...   |
| 56       | ...         | ...      | ...  | ...  | ...   |
| 57       | ...         | ...      | ...  | ...  | ...   |
| 58       | ...         | ...      | ...  | ...  | ...   |
| 59       | ...         | ...      | ...  | ...  | ...   |
| 60       | ...         | ...      | ...  | ...  | ...   |
| 61       | ...         | ...      | ...  | ...  | ...   |
| 62       | ...         | ...      | ...  | ...  | ...   |
| 63       | ...         | ...      | ...  | ...  | ...   |
| 64       | ...         | ...      | ...  | ...  | ...   |
| 65       | ...         | ...      | ...  | ...  | ...   |
| 66       | ...         | ...      | ...  | ...  | ...   |
| 67       | ...         | ...      | ...  | ...  | ...   |
| 68       | ...         | ...      | ...  | ...  | ...   |
| 69       | ...         | ...      | ...  | ...  | ...   |
| 70       | ...         | ...      | ...  | ...  | ...   |
| 71       | ...         | ...      | ...  | ...  | ...   |
| 72       | ...         | ...      | ...  | ...  | ...   |
| 73       | ...         | ...      | ...  | ...  | ...   |
| 74       | ...         | ...      | ...  | ...  | ...   |
| 75       | ...         | ...      | ...  | ...  | ...   |
| 76       | ...         | ...      | ...  | ...  | ...   |
| 77       | ...         | ...      | ...  | ...  | ...   |
| 78       | ...         | ...      | ...  | ...  | ...   |
| 79       | ...         | ...      | ...  | ...  | ...   |
| 80       | ...         | ...      | ...  | ...  | ...   |
| 81       | ...         | ...      | ...  | ...  | ...   |
| 82       | ...         | ...      | ...  | ...  | ...   |
| 83       | ...         | ...      | ...  | ...  | ...   |
| 84       | ...         | ...      | ...  | ...  | ...   |
| 85       | ...         | ...      | ...  | ...  | ...   |
| 86       | ...         | ...      | ...  | ...  | ...   |
| 87       | ...         | ...      | ...  | ...  | ...   |
| 88       | ...         | ...      | ...  | ...  | ...   |
| 89       | ...         | ...      | ...  | ...  | ...   |
| 90       | ...         | ...      | ...  | ...  | ...   |
| 91       | ...         | ...      | ...  | ...  | ...   |
| 92       | ...         | ...      | ...  | ...  | ...   |
| 93       | ...         | ...      | ...  | ...  | ...   |
| 94       | ...         | ...      | ...  | ...  | ...   |
| 95       | ...         | ...      | ...  | ...  | ...   |
| 96       | ...         | ...      | ...  | ...  | ...   |
| 97       | ...         | ...      | ...  | ...  | ...   |
| 98       | ...         | ...      | ...  | ...  | ...   |
| 99       | ...         | ...      | ...  | ...  | ...   |
| 100      | ...         | ...      | ...  | ...  | ...   |
| 101      | ...         | ...      | ...  | ...  | ...   |
| 102      | ...         | ...      | ...  | ...  | ...   |
| 103      | ...         | ...      | ...  | ...  | ...   |
| 104      | ...         | ...      | ...  | ...  | ...   |
| 105      | ...         | ...      | ...  | ...  | ...   |
| 106      | ...         | ...      | ...  | ...  | ...   |
| 107      | ...         | ...      | ...  | ...  | ...   |
| 108      | ...         | ...      | ...  | ...  | ...   |
| 109      | ...         | ...      | ...  | ...  | ...   |
| 110      | ...         | ...      | ...  | ...  | ...   |
| 111      | ...         | ...      | ...  | ...  | ...   |
| 112      | ...         | ...      | ...  | ...  | ...   |
| 113      | ...         | ...      | ...  | ...  | ...   |
| 114      | ...         | ...      | ...  | ...  | ...   |
| 115      | ...         | ...      | ...  | ...  | ...   |
| 116      | ...         | ...      | ...  | ...  | ...   |
| 117      | ...         | ...      | ...  | ...  | ...   |
| 118      | ...         | ...      | ...  | ...  | ...   |
| 119      | ...         | ...      | ...  | ...  | ...   |
| 120      | ...         | ...      | ...  | ...  | ...   |
| 121      | ...         | ...      | ...  | ...  | ...   |
| 122      | ...         | ...      | ...  | ...  | ...   |
| 123      | ...         | ...      | ...  | ...  | ...   |
| 124      | ...         | ...      | ...  | ...  | ...   |
| 125      | ...         | ...      | ...  | ...  | ...   |
| 126      | ...         | ...      | ...  | ...  | ...   |
| 127      | ...         | ...      | ...  | ...  | ...   |
| 128      | ...         | ...      | ...  | ...  | ...   |
| 129      | ...         | ...      | ...  | ...  | ...   |
| 130      | ...         | ...      | ...  | ...  | ...   |
| 131      | ...         | ...      | ...  | ...  | ...   |
| 132      | ...         | ...      | ...  | ...  | ...   |
| 133      | ...         | ...      | ...  | ...  | ...   |
| 134      | ...         | ...      | ...  | ...  | ...   |
| 135      | ...         | ...      | ...  | ...  | ...   |
| 136      | ...         | ...      | ...  | ...  | ...   |
| 137      | ...         | ...      | ...  | ...  | ...   |
| 138      | ...         | ...      | ...  | ...  | ...   |
| 139      | ...         | ...      | ...  | ...  | ...   |
| 140      | ...         | ...      | ...  | ...  | ...   |
| 141      | ...         | ...      | ...  | ...  | ...   |
| 142      | ...         | ...      | ...  | ...  | ...   |
| 143      | ...         | ...      | ...  | ...  | ...   |
| 144      | ...         | ...      | ...  | ...  | ...   |
| 145      | ...         | ...      | ...  | ...  | ...   |
| 146      | ...         | ...      | ...  | ...  | ...   |
| 147      | ...         | ...      | ...  | ...  | ...   |
| 148      | ...         | ...      | ...  | ...  | ...   |
| 149      | ...         | ...      | ...  | ...  | ...   |
| 150      | ...         | ...      | ...  | ...  | ...   |
| 151      | ...         | ...      | ...  | ...  | ...   |
| 152      | ...         | ...      | ...  | ...  | ...   |
| 153      | ...         | ...      | ...  | ...  | ...   |
| 154      | ...         | ...      | ...  | ...  | ...   |
| 155      | ...         | ...      | ...  | ...  | ...   |
| 156      | ...         | ...      | ...  | ...  | ...   |
| 157      | ...         | ...      | ...  | ...  | ...   |
| 158      | ...         | ...      | ...  | ...  | ...   |
| 159      | ...         | ...      | ...  | ...  | ...   |
| 160      | ...         | ...      | ...  | ...  | ...   |
| 161      | ...         | ...      | ...  | ...  | ...   |
| 162      | ...         | ...      | ...  | ...  | ...   |
| 163      | ...         | ...      | ...  | ...  | ...   |
| 164      | ...         | ...      | ...  | ...  | ...   |
| 165      | ...         | ...      | ...  | ...  | ...   |
| 166      | ...         | ...      | ...  | ...  | ...   |
| 167      | ...         | ...      | ...  | ...  | ...   |
| 168      | ...         | ...      | ...  | ...  | ...   |
| 169      | ...         | ...      | ...  | ...  | ...   |
| 170      | ...         | ...      | ...  | ...  | ...   |
| 171      | ...         | ...      | ...  | ...  | ...   |
| 172      | ...         | ...      | ...  | ...  | ...   |
| 173      | ...         | ...      | ...  | ...  | ...   |
| 174      | ...         | ...      | ...  | ...  | ...   |
| 175      | ...         | ...      | ...  | ...  | ...   |
| 176      | ...         | ...      | ...  | ...  | ...   |
| 177      | ...         | ...      | ...  | ...  | ...   |
| 178      | ...         | ...      | ...  | ...  | ...   |
| 179      | ...         | ...      | ...  | ...  | ...   |
| 180      | ...         | ...      | ...  | ...  | ...   |
| 181      | ...         | ...      | ...  | ...  | ...   |
| 182      | ...         | ...      | ...  | ...  | ...   |
| 183      | ...         | ...      | ...  | ...  | ...   |
| 184      | ...         | ...      | ...  | ...  | ...   |
| 185      | ...         | ...      | ...  | ...  | ...   |
| 186      | ...         | ...      | ...  | ...  | ...   |
| 187      | ...         | ...      | ...  | ...  | ...   |
| 188      | ...         | ...      | ...  | ...  | ...   |
| 189      | ...         | ...      | ...  | ...  | ...   |
| 190      | ...         | ...      | ...  | ...  | ...   |
| 191      | ...         | ...      | ...  | ...  | ...   |
| 192      | ...         | ...      | ...  | ...  | ...   |
| 193      | ...         | ...      | ...  | ...  | ...   |
| 194      | ...         | ...      | ...  | ...  | ...   |
| 195      | ...         | ...      | ...  | ...  | ...   |
| 196      | ...         | ...      | ...  | ...  | ...   |
| 197      | ...         | ...      | ...  | ...  | ...   |
| 198      | ...         | ...      | ...  | ...  | ...   |
| 199      | ...         | ...      | ...  | ...  | ...   |
| 200      | ...         | ...      | ...  | ...  | ...   |
| 201      | ...         | ...      | ...  | ...  | ...   |
| 202      | ...         | ...      | ...  | ...  | ...   |
| 203      | ...         | ...      | ...  | ...  | ...   |
| 204      | ...         | ...      | ...  | ...  | ...   |
| 205      | ...         | ...      | ...  | ...  | ...   |
| 206      | ...         | ...      | ...  | ...  | ...   |
| 207      | ...         | ...      | ...  | ...  | ...   |
| 208      | ...         | ...      | ...  | ...  | ...   |
| 209      | ...         | ...      | ...  | ...  | ...   |
| 210      | ...         | ...      | ...  | ...  | ...   |
| 211      | ...         | ...      | ...  | ...  | ...   |
| 212      | ...         | ...      | ...  | ...  | ...   |
| 213      | ...         | ...      | ...  | ...  | ...   |
| 214      | ...         | ...      | ...  | ...  | ...   |
| 215      | ...         | ...      | ...  | ...  | ...   |
| 216      | ...         | ...      | ...  | ...  | ...   |
| 217      | ...         | ...      | ...  | ...  | ...   |
| 218      | ...         | ...      | ...  | ...  | ...   |
| 219      | ...         | ...      | ...  | ...  | ...   |
| 220      | ...         | ...      | ...  | ...  | ...   |
| 221      | ...         | ...      | ...  | ...  | ...   |
| 222      | ...         | ...      | ...  | ...  | ...   |
| 223      | ...         | ...      | ...  | ...  | ...   |
| 224      | ...         | ...      | ...  | ...  | ...   |
| 225      | ...         | ...      | ...  | ...  | ...   |
| 226      | ...         | ...      | ...  | ...  | ...   |
| 227      | ...         | ...      | ...  | ...  | ...   |
| 228      | ...         | ...      | ...  | ...  | ...   |
| 229      | ...         | ...      | ...  | ...  | ...   |
| 230      | ...         | ...      | ...  | ...  | ...   |
| 231      | ...         | ...      | ...  | ...  | ...   |
| 232      | ...         | ...      | ...  | ...  | ...   |
| 233      | ...         | ...      | ...  | ...  | ...   |
| 234      | ...         | ...      | ...  | ...  | ...   |
| 235      | ...         | ...      | ...  | ...  | ...   |
| 236      | ...         | ...      | ...  | ...  | ...   |
| 237      | ...         | ...      | ...  | ...  | ...   |
| 238      | ...         | ...      | ...  | ...  | ...   |
| 239      | ...         | ...      | ...  | ...  | ...   |
| 240      | ...         | ...      | ...  | ...  | ...   |
| 241      | ...         | ...      | ...  | ...  | ...   |
| 242      | ...         | ...      | ...  | ...  | ...   |
| 243      | ...         | ...      | ...  | ...  | ...   |
| 244      | ...         | ...      | ...  | ...  | ...   |
| 245      | ...         | ...      | ...  | ...  | ...   |
| 246      | ...         | ...      | ...  | ...  | ...   |
| 247      | ...         | ...      | ...  | ...  | ...   |
| 248      | ...         | ...      | ...  | ...  | ...   |
| 249      | ...         | ...      | ...  | ...  | ...   |
| 250      | ...         | ...      | ...  | ...  | ...   |
| 251      | ...         | ...      | ...  | ...  | ...   |
| 252      | ...         | ...      | ...  | ...  | ...   |
| 253      | ...         | ...      | ...  | ...  | ...   |
| 254      | ...         | ...      | ...  | ...  | ...   |
| 255      | ...         | ...      | ...  | ...  | ...   |
| 256      | ...         | ...      | ...  | ...  | ...   |
| 257      | ...         | ...      | ...  | ...  | ...   |
| 258      | ...         | ...      | ...  | ...  | ...   |
| 259      | ...         | ...      | ...  | ...  | ...   |
| 260      | ...         | ...      | ...  | ...  | ...   |
| 261      | ...         | ...      | ...  | ...  | ...   |
| 262      | ...         | ...      | ...  | ...  | ...   |
| 263      | ...         | ...      | ...  | ...  | ...   |
| 264      | ...         | ...      | ...  | ...  | ...   |
| 265      | ...         | ...      | ...  | ...  | ...   |
| 266      | ...         | ...      | ...  | ...  | ...   |
| 267      | ...         | ...      | ...  | ...  | ...   |
| 268      | ...         | ...      | ...  | ...  | ...   |
| 269      | ...         | ...      | ...  | ...  | ...   |
| 270      | ...         | ...      |      |      |       |

| Item No. | Description | Quantity | Unit | Rate | Amount |
|----------|-------------|----------|------|------|--------|
| 1        | ...         | ...      | ...  | ...  | ...    |
| 2        | ...         | ...      | ...  | ...  | ...    |
| 3        | ...         | ...      | ...  | ...  | ...    |
| 4        | ...         | ...      | ...  | ...  | ...    |
| 5        | ...         | ...      | ...  | ...  | ...    |
| 6        | ...         | ...      | ...  | ...  | ...    |
| 7        | ...         | ...      | ...  | ...  | ...    |
| 8        | ...         | ...      | ...  | ...  | ...    |
| 9        | ...         | ...      | ...  | ...  | ...    |
| 10       | ...         | ...      | ...  | ...  | ...    |
| 11       | ...         | ...      | ...  | ...  | ...    |
| 12       | ...         | ...      | ...  | ...  | ...    |
| 13       | ...         | ...      | ...  | ...  | ...    |
| 14       | ...         | ...      | ...  | ...  | ...    |
| 15       | ...         | ...      | ...  | ...  | ...    |
| 16       | ...         | ...      | ...  | ...  | ...    |
| 17       | ...         | ...      | ...  | ...  | ...    |
| 18       | ...         | ...      | ...  | ...  | ...    |
| 19       | ...         | ...      | ...  | ...  | ...    |
| 20       | ...         | ...      | ...  | ...  | ...    |
| 21       | ...         | ...      | ...  | ...  | ...    |
| 22       | ...         | ...      | ...  | ...  | ...    |
| 23       | ...         | ...      | ...  | ...  | ...    |
| 24       | ...         | ...      | ...  | ...  | ...    |
| 25       | ...         | ...      | ...  | ...  | ...    |
| 26       | ...         | ...      | ...  | ...  | ...    |
| 27       | ...         | ...      | ...  | ...  | ...    |
| 28       | ...         | ...      | ...  | ...  | ...    |
| 29       | ...         | ...      | ...  | ...  | ...    |
| 30       | ...         | ...      | ...  | ...  | ...    |
| 31       | ...         | ...      | ...  | ...  | ...    |
| 32       | ...         | ...      | ...  | ...  | ...    |
| 33       | ...         | ...      | ...  | ...  | ...    |
| 34       | ...         | ...      | ...  | ...  | ...    |
| 35       | ...         | ...      | ...  | ...  | ...    |
| 36       | ...         | ...      | ...  | ...  | ...    |
| 37       | ...         | ...      | ...  | ...  | ...    |
| 38       | ...         | ...      | ...  | ...  | ...    |
| 39       | ...         | ...      | ...  | ...  | ...    |
| 40       | ...         | ...      | ...  | ...  | ...    |
| 41       | ...         | ...      | ...  | ...  | ...    |
| 42       | ...         | ...      | ...  | ...  | ...    |
| 43       | ...         | ...      | ...  | ...  | ...    |
| 44       | ...         | ...      | ...  | ...  | ...    |
| 45       | ...         | ...      | ...  | ...  | ...    |
| 46       | ...         | ...      | ...  | ...  | ...    |
| 47       | ...         | ...      | ...  | ...  | ...    |
| 48       | ...         | ...      | ...  | ...  | ...    |
| 49       | ...         | ...      | ...  | ...  | ...    |
| 50       | ...         | ...      | ...  | ...  | ...    |
| 51       | ...         | ...      | ...  | ...  | ...    |
| 52       | ...         | ...      | ...  | ...  | ...    |
| 53       | ...         | ...      | ...  | ...  | ...    |
| 54       | ...         | ...      | ...  | ...  | ...    |
| 55       | ...         | ...      | ...  | ...  | ...    |
| 56       | ...         | ...      | ...  | ...  | ...    |
| 57       | ...         | ...      | ...  | ...  | ...    |
| 58       | ...         | ...      | ...  | ...  | ...    |
| 59       | ...         | ...      | ...  | ...  | ...    |
| 60       | ...         | ...      | ...  | ...  | ...    |
| 61       | ...         | ...      | ...  | ...  | ...    |
| 62       | ...         | ...      | ...  | ...  | ...    |
| 63       | ...         | ...      | ...  | ...  | ...    |
| 64       | ...         | ...      | ...  | ...  | ...    |
| 65       | ...         | ...      | ...  | ...  | ...    |
| 66       | ...         | ...      | ...  | ...  | ...    |
| 67       | ...         | ...      | ...  | ...  | ...    |
| 68       | ...         | ...      | ...  | ...  | ...    |
| 69       | ...         | ...      | ...  | ...  | ...    |
| 70       | ...         | ...      | ...  | ...  | ...    |
| 71       | ...         | ...      | ...  | ...  | ...    |
| 72       | ...         | ...      | ...  | ...  | ...    |
| 73       | ...         | ...      | ...  | ...  | ...    |
| 74       | ...         | ...      | ...  | ...  | ...    |
| 75       | ...         | ...      | ...  | ...  | ...    |
| 76       | ...         | ...      | ...  | ...  | ...    |
| 77       | ...         | ...      | ...  | ...  | ...    |
| 78       | ...         | ...      | ...  | ...  | ...    |
| 79       | ...         | ...      | ...  | ...  | ...    |
| 80       | ...         | ...      | ...  | ...  | ...    |
| 81       | ...         | ...      | ...  | ...  | ...    |
| 82       | ...         | ...      | ...  | ...  | ...    |
| 83       | ...         | ...      | ...  | ...  | ...    |
| 84       | ...         | ...      | ...  | ...  | ...    |
| 85       | ...         | ...      | ...  | ...  | ...    |
| 86       | ...         | ...      | ...  | ...  | ...    |
| 87       | ...         | ...      | ...  | ...  | ...    |
| 88       | ...         | ...      | ...  | ...  | ...    |
| 89       | ...         | ...      | ...  | ...  | ...    |
| 90       | ...         | ...      | ...  | ...  | ...    |
| 91       | ...         | ...      | ...  | ...  | ...    |
| 92       | ...         | ...      | ...  | ...  | ...    |
| 93       | ...         | ...      | ...  | ...  | ...    |
| 94       | ...         | ...      | ...  | ...  | ...    |
| 95       | ...         | ...      | ...  | ...  | ...    |
| 96       | ...         | ...      | ...  | ...  | ...    |
| 97       | ...         | ...      | ...  | ...  | ...    |
| 98       | ...         | ...      | ...  | ...  | ...    |
| 99       | ...         | ...      | ...  | ...  | ...    |
| 100      | ...         | ...      | ...  | ...  | ...    |



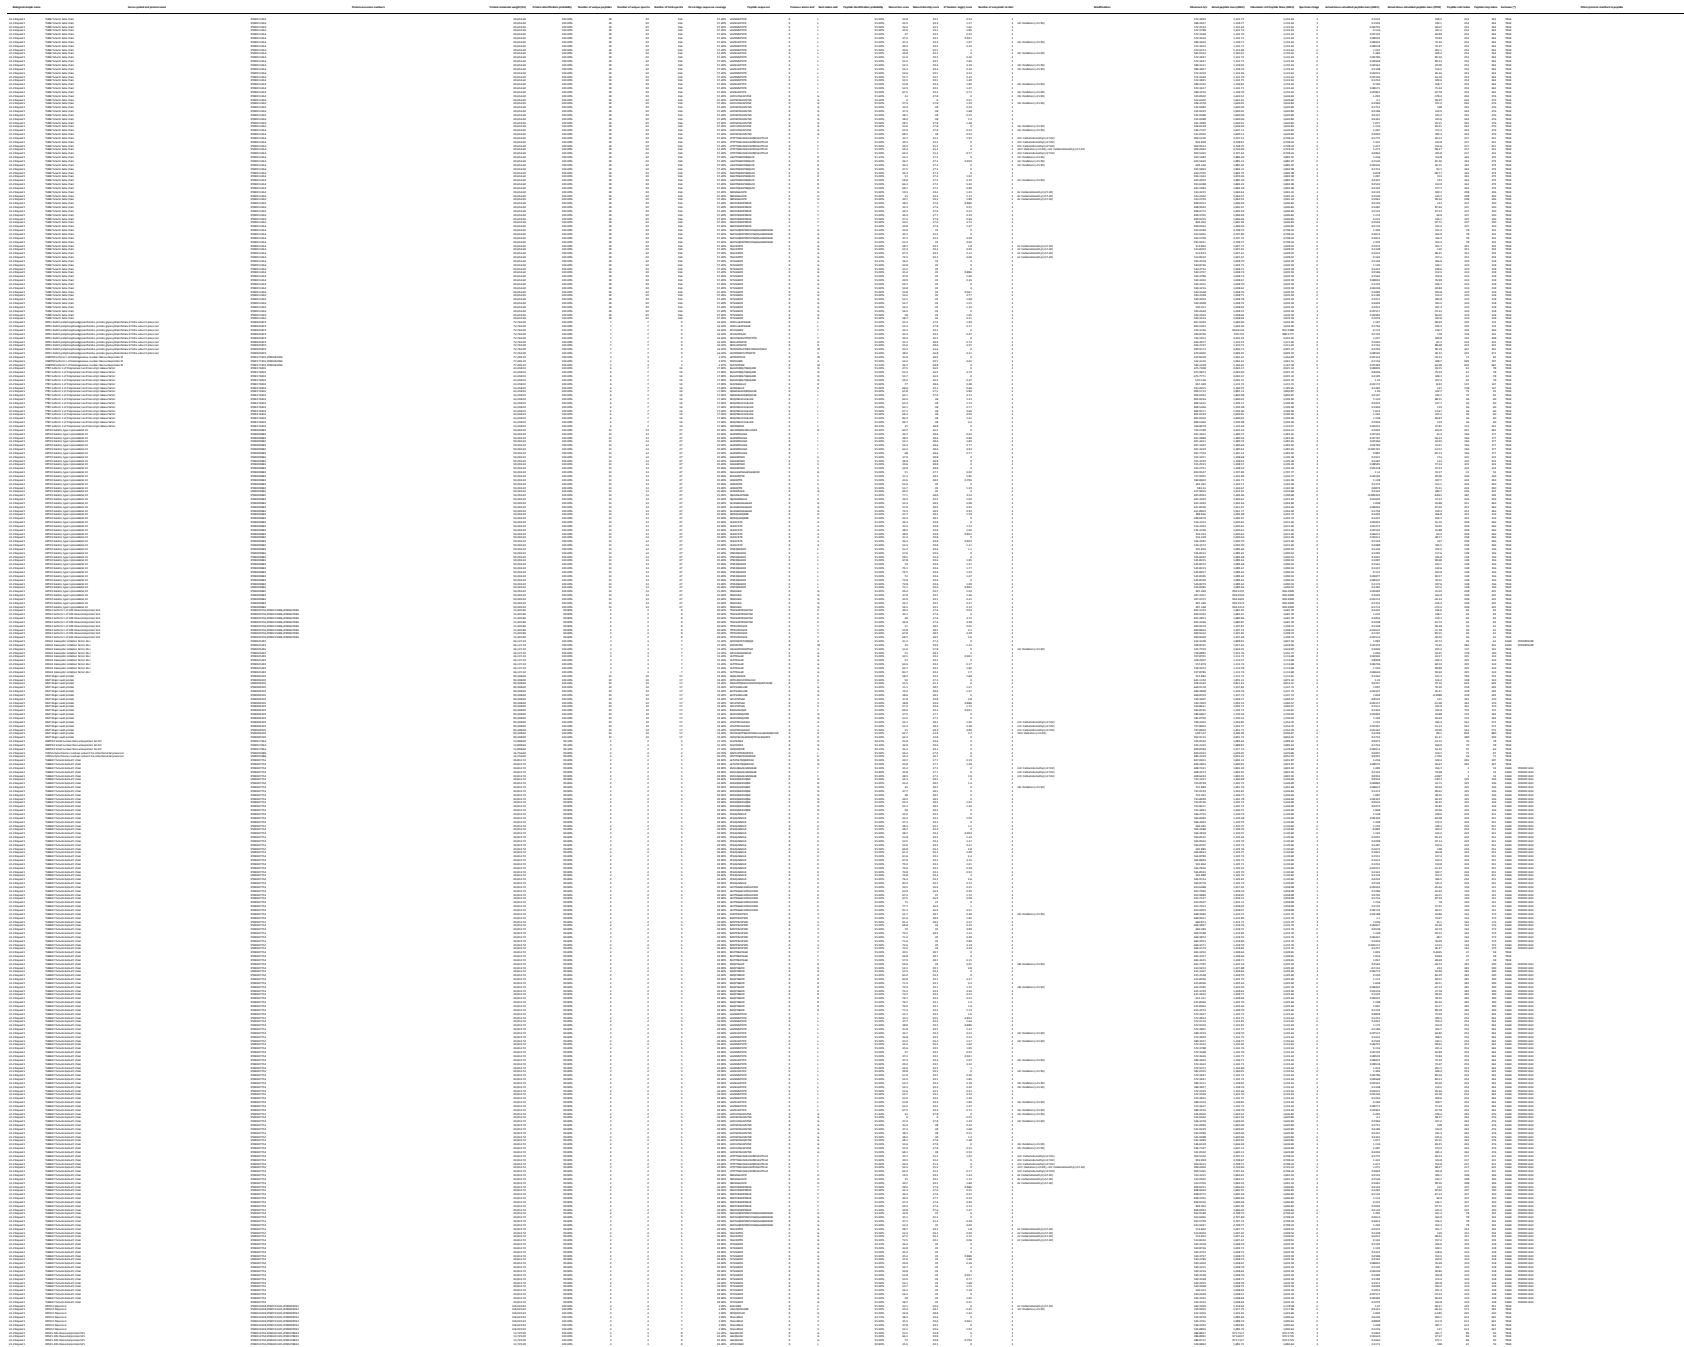

| Item No. | Description | Unit | Quantity | Rate | Amount |
|----------|-------------|------|----------|------|--------|
| 1        | ...         | ...  | ...      | ...  | ...    |
| 2        | ...         | ...  | ...      | ...  | ...    |
| 3        | ...         | ...  | ...      | ...  | ...    |
| 4        | ...         | ...  | ...      | ...  | ...    |
| 5        | ...         | ...  | ...      | ...  | ...    |
| 6        | ...         | ...  | ...      | ...  | ...    |
| 7        | ...         | ...  | ...      | ...  | ...    |
| 8        | ...         | ...  | ...      | ...  | ...    |
| 9        | ...         | ...  | ...      | ...  | ...    |
| 10       | ...         | ...  | ...      | ...  | ...    |
| 11       | ...         | ...  | ...      | ...  | ...    |
| 12       | ...         | ...  | ...      | ...  | ...    |
| 13       | ...         | ...  | ...      | ...  | ...    |
| 14       | ...         | ...  | ...      | ...  | ...    |
| 15       | ...         | ...  | ...      | ...  | ...    |
| 16       | ...         | ...  | ...      | ...  | ...    |
| 17       | ...         | ...  | ...      | ...  | ...    |
| 18       | ...         | ...  | ...      | ...  | ...    |
| 19       | ...         | ...  | ...      | ...  | ...    |
| 20       | ...         | ...  | ...      | ...  | ...    |
| 21       | ...         | ...  | ...      | ...  | ...    |
| 22       | ...         | ...  | ...      | ...  | ...    |
| 23       | ...         | ...  | ...      | ...  | ...    |
| 24       | ...         | ...  | ...      | ...  | ...    |
| 25       | ...         | ...  | ...      | ...  | ...    |
| 26       | ...         | ...  | ...      | ...  | ...    |
| 27       | ...         | ...  | ...      | ...  | ...    |
| 28       | ...         | ...  | ...      | ...  | ...    |
| 29       | ...         | ...  | ...      | ...  | ...    |
| 30       | ...         | ...  | ...      | ...  | ...    |
| 31       | ...         | ...  | ...      | ...  | ...    |
| 32       | ...         | ...  | ...      | ...  | ...    |
| 33       | ...         | ...  | ...      | ...  | ...    |
| 34       | ...         | ...  | ...      | ...  | ...    |
| 35       | ...         | ...  | ...      | ...  | ...    |
| 36       | ...         | ...  | ...      | ...  | ...    |
| 37       | ...         | ...  | ...      | ...  | ...    |
| 38       | ...         | ...  | ...      | ...  | ...    |
| 39       | ...         | ...  | ...      | ...  | ...    |
| 40       | ...         | ...  | ...      | ...  | ...    |
| 41       | ...         | ...  | ...      | ...  | ...    |
| 42       | ...         | ...  | ...      | ...  | ...    |
| 43       | ...         | ...  | ...      | ...  | ...    |
| 44       | ...         | ...  | ...      | ...  | ...    |
| 45       | ...         | ...  | ...      | ...  | ...    |
| 46       | ...         | ...  | ...      | ...  | ...    |
| 47       | ...         | ...  | ...      | ...  | ...    |
| 48       | ...         | ...  | ...      | ...  | ...    |
| 49       | ...         | ...  | ...      | ...  | ...    |
| 50       | ...         | ...  | ...      | ...  | ...    |
| 51       | ...         | ...  | ...      | ...  | ...    |
| 52       | ...         | ...  | ...      | ...  | ...    |
| 53       | ...         | ...  | ...      | ...  | ...    |
| 54       | ...         | ...  | ...      | ...  | ...    |
| 55       | ...         | ...  | ...      | ...  | ...    |
| 56       | ...         | ...  | ...      | ...  | ...    |
| 57       | ...         | ...  | ...      | ...  | ...    |
| 58       | ...         | ...  | ...      | ...  | ...    |
| 59       | ...         | ...  | ...      | ...  | ...    |
| 60       | ...         | ...  | ...      | ...  | ...    |
| 61       | ...         | ...  | ...      | ...  | ...    |
| 62       | ...         | ...  | ...      | ...  | ...    |
| 63       | ...         | ...  | ...      | ...  | ...    |
| 64       | ...         | ...  | ...      | ...  | ...    |
| 65       | ...         | ...  | ...      | ...  | ...    |
| 66       | ...         | ...  | ...      | ...  | ...    |
| 67       | ...         | ...  | ...      | ...  | ...    |
| 68       | ...         | ...  | ...      | ...  | ...    |
| 69       | ...         | ...  | ...      | ...  | ...    |
| 70       | ...         | ...  | ...      | ...  | ...    |
| 71       | ...         | ...  | ...      | ...  | ...    |
| 72       | ...         | ...  | ...      | ...  | ...    |
| 73       | ...         | ...  | ...      | ...  | ...    |
| 74       | ...         | ...  | ...      | ...  | ...    |
| 75       | ...         | ...  | ...      | ...  | ...    |
| 76       | ...         | ...  | ...      | ...  | ...    |
| 77       | ...         | ...  | ...      | ...  | ...    |
| 78       | ...         | ...  | ...      | ...  | ...    |
| 79       | ...         | ...  | ...      | ...  | ...    |
| 80       | ...         | ...  | ...      | ...  | ...    |
| 81       | ...         | ...  | ...      | ...  | ...    |
| 82       | ...         | ...  | ...      | ...  | ...    |
| 83       | ...         | ...  | ...      | ...  | ...    |
| 84       | ...         | ...  | ...      | ...  | ...    |
| 85       | ...         | ...  | ...      | ...  | ...    |
| 86       | ...         | ...  | ...      | ...  | ...    |
| 87       | ...         | ...  | ...      | ...  | ...    |
| 88       | ...         | ...  | ...      | ...  | ...    |
| 89       | ...         | ...  | ...      | ...  | ...    |
| 90       | ...         | ...  | ...      | ...  | ...    |
| 91       | ...         | ...  | ...      | ...  | ...    |
| 92       | ...         | ...  | ...      | ...  | ...    |
| 93       | ...         | ...  | ...      | ...  | ...    |
| 94       | ...         | ...  | ...      | ...  | ...    |
| 95       | ...         | ...  | ...      | ...  | ...    |
| 96       | ...         | ...  | ...      | ...  | ...    |
| 97       | ...         | ...  | ...      | ...  | ...    |
| 98       | ...         | ...  | ...      | ...  | ...    |
| 99       | ...         | ...  | ...      | ...  | ...    |
| 100      | ...         | ...  | ...      | ...  | ...    |





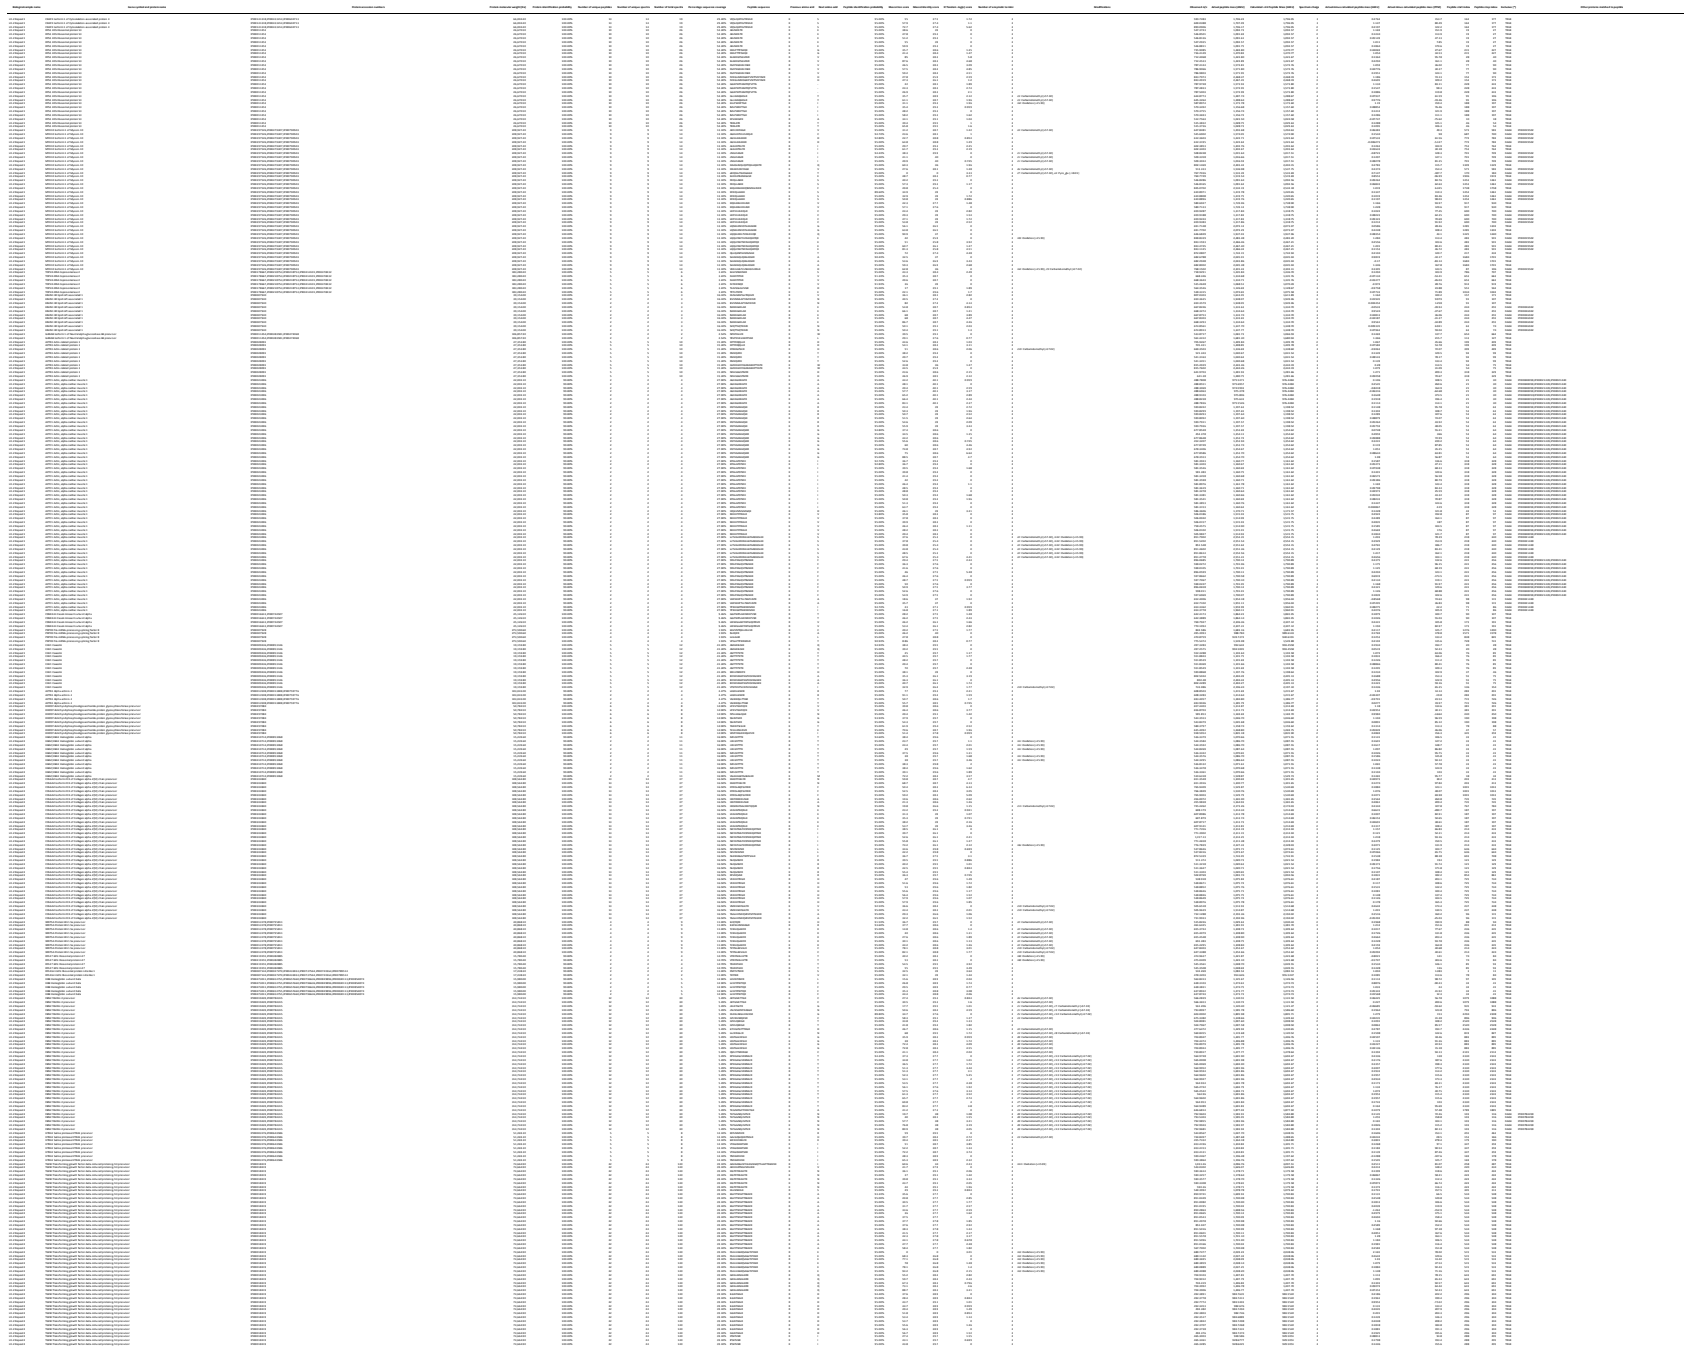

Table with multiple columns and rows, containing dense text and some graphical elements. The table is oriented vertically on the page.

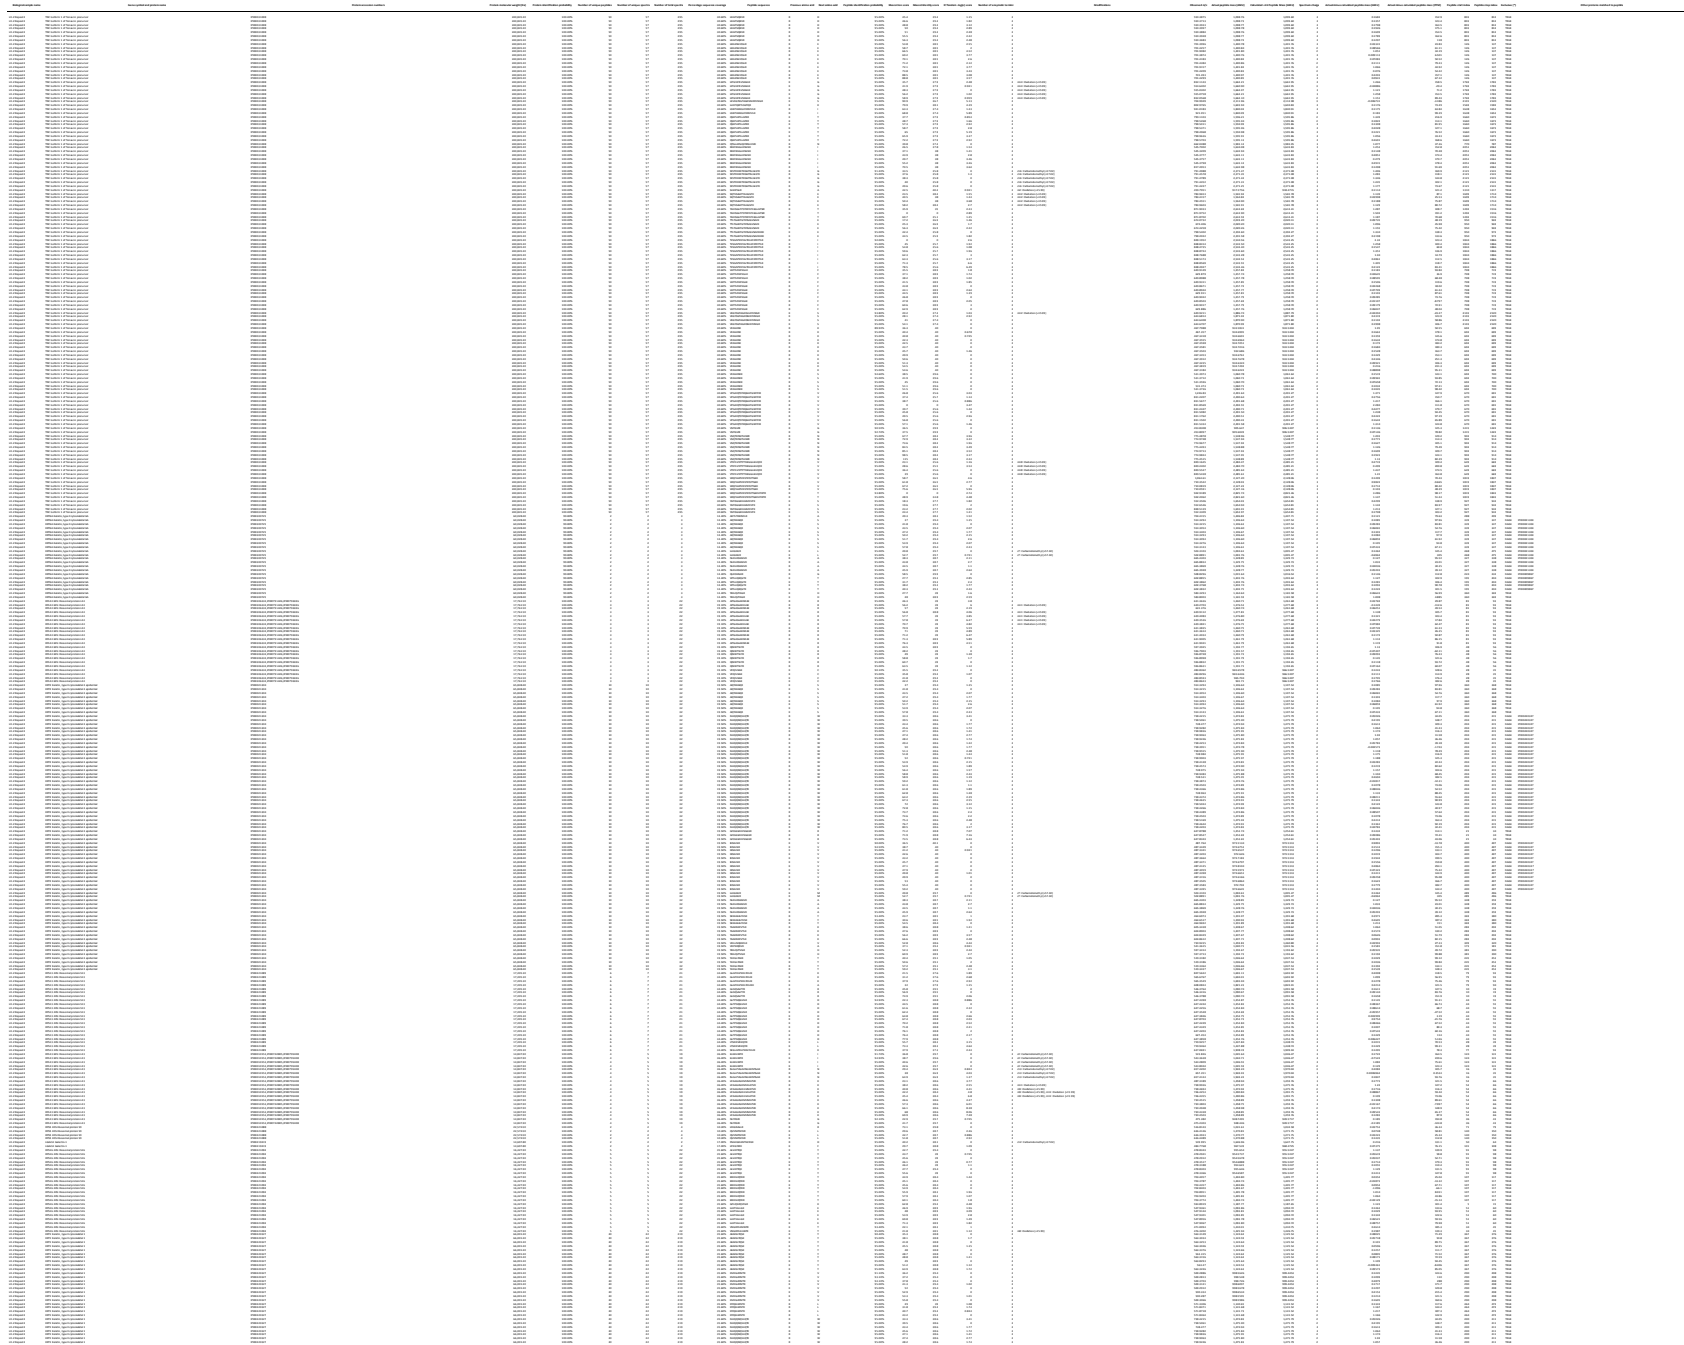

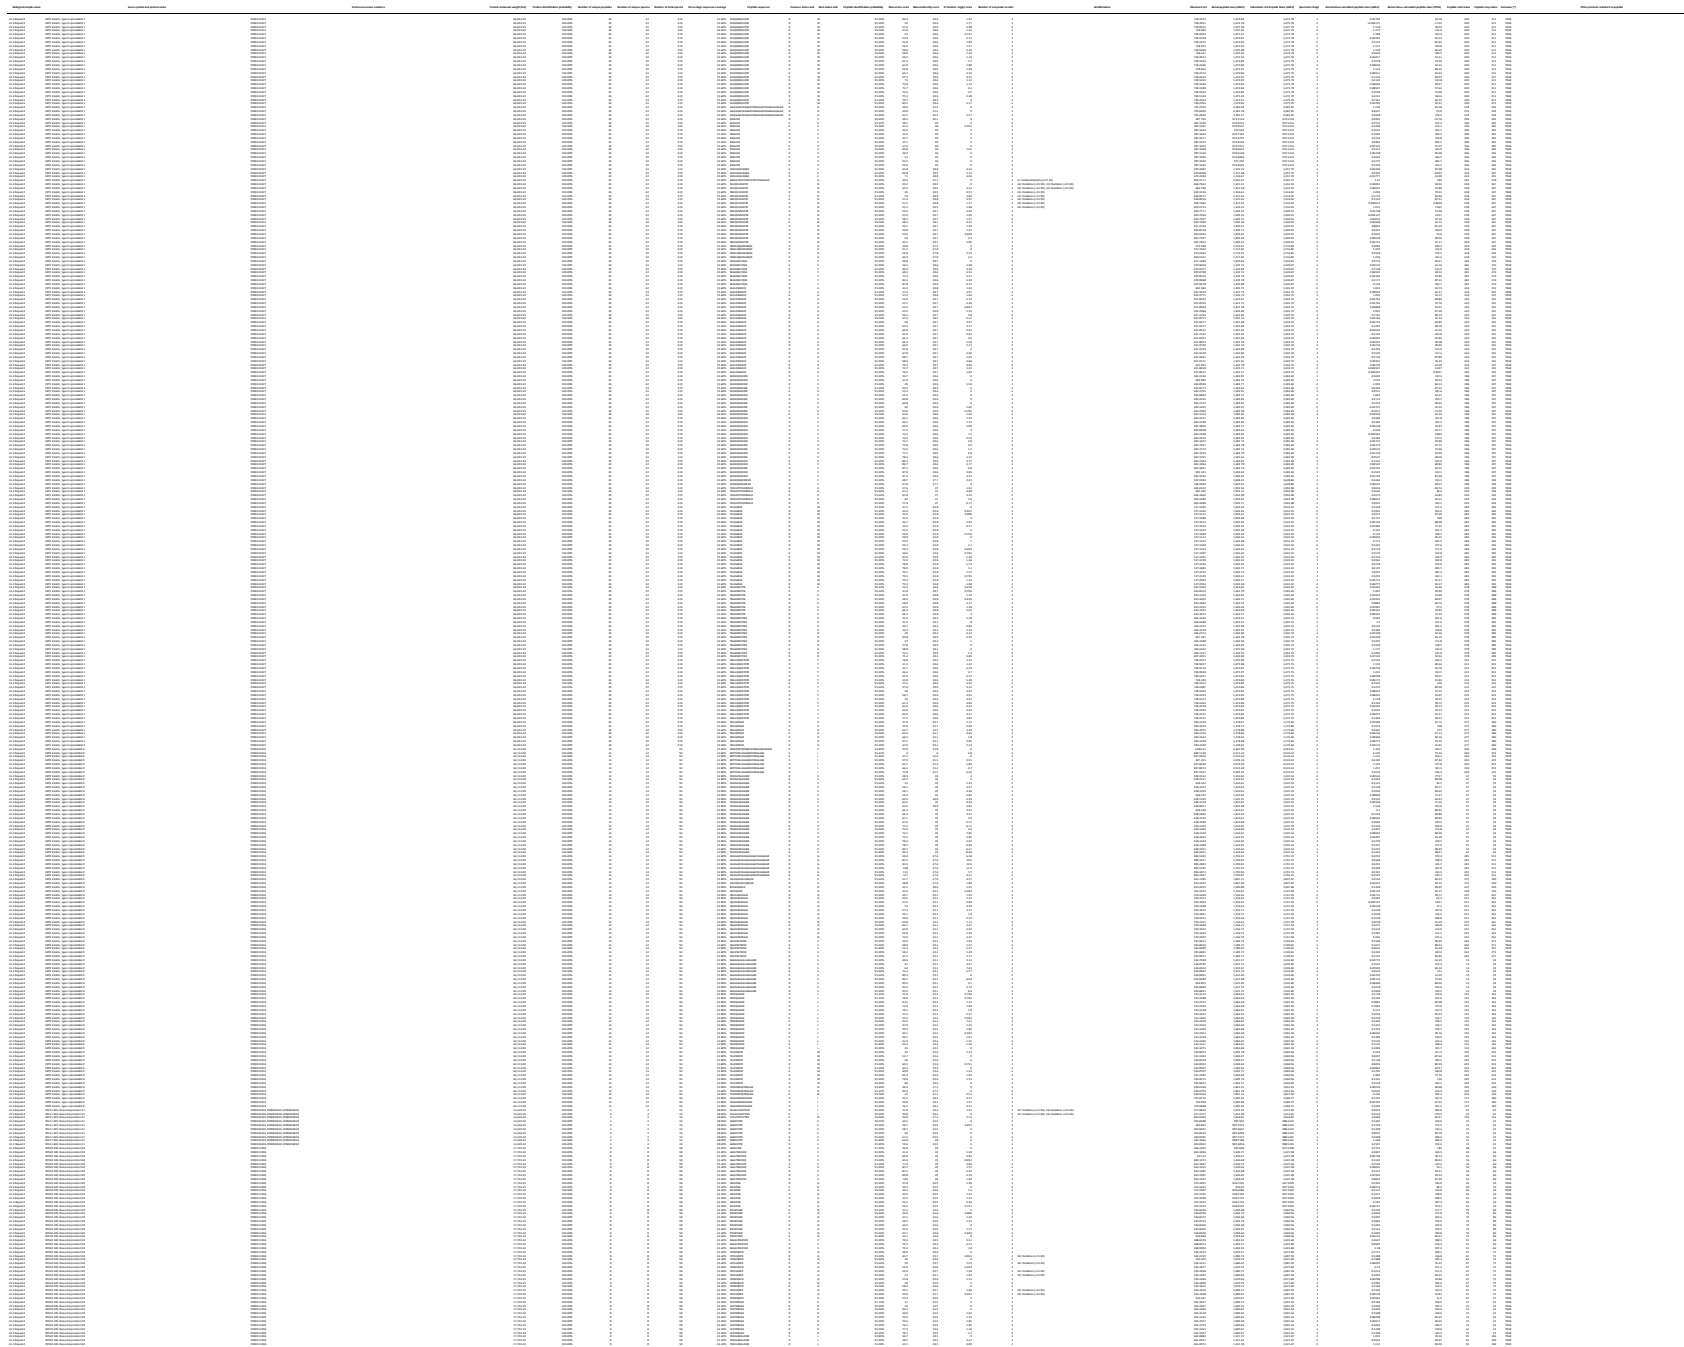

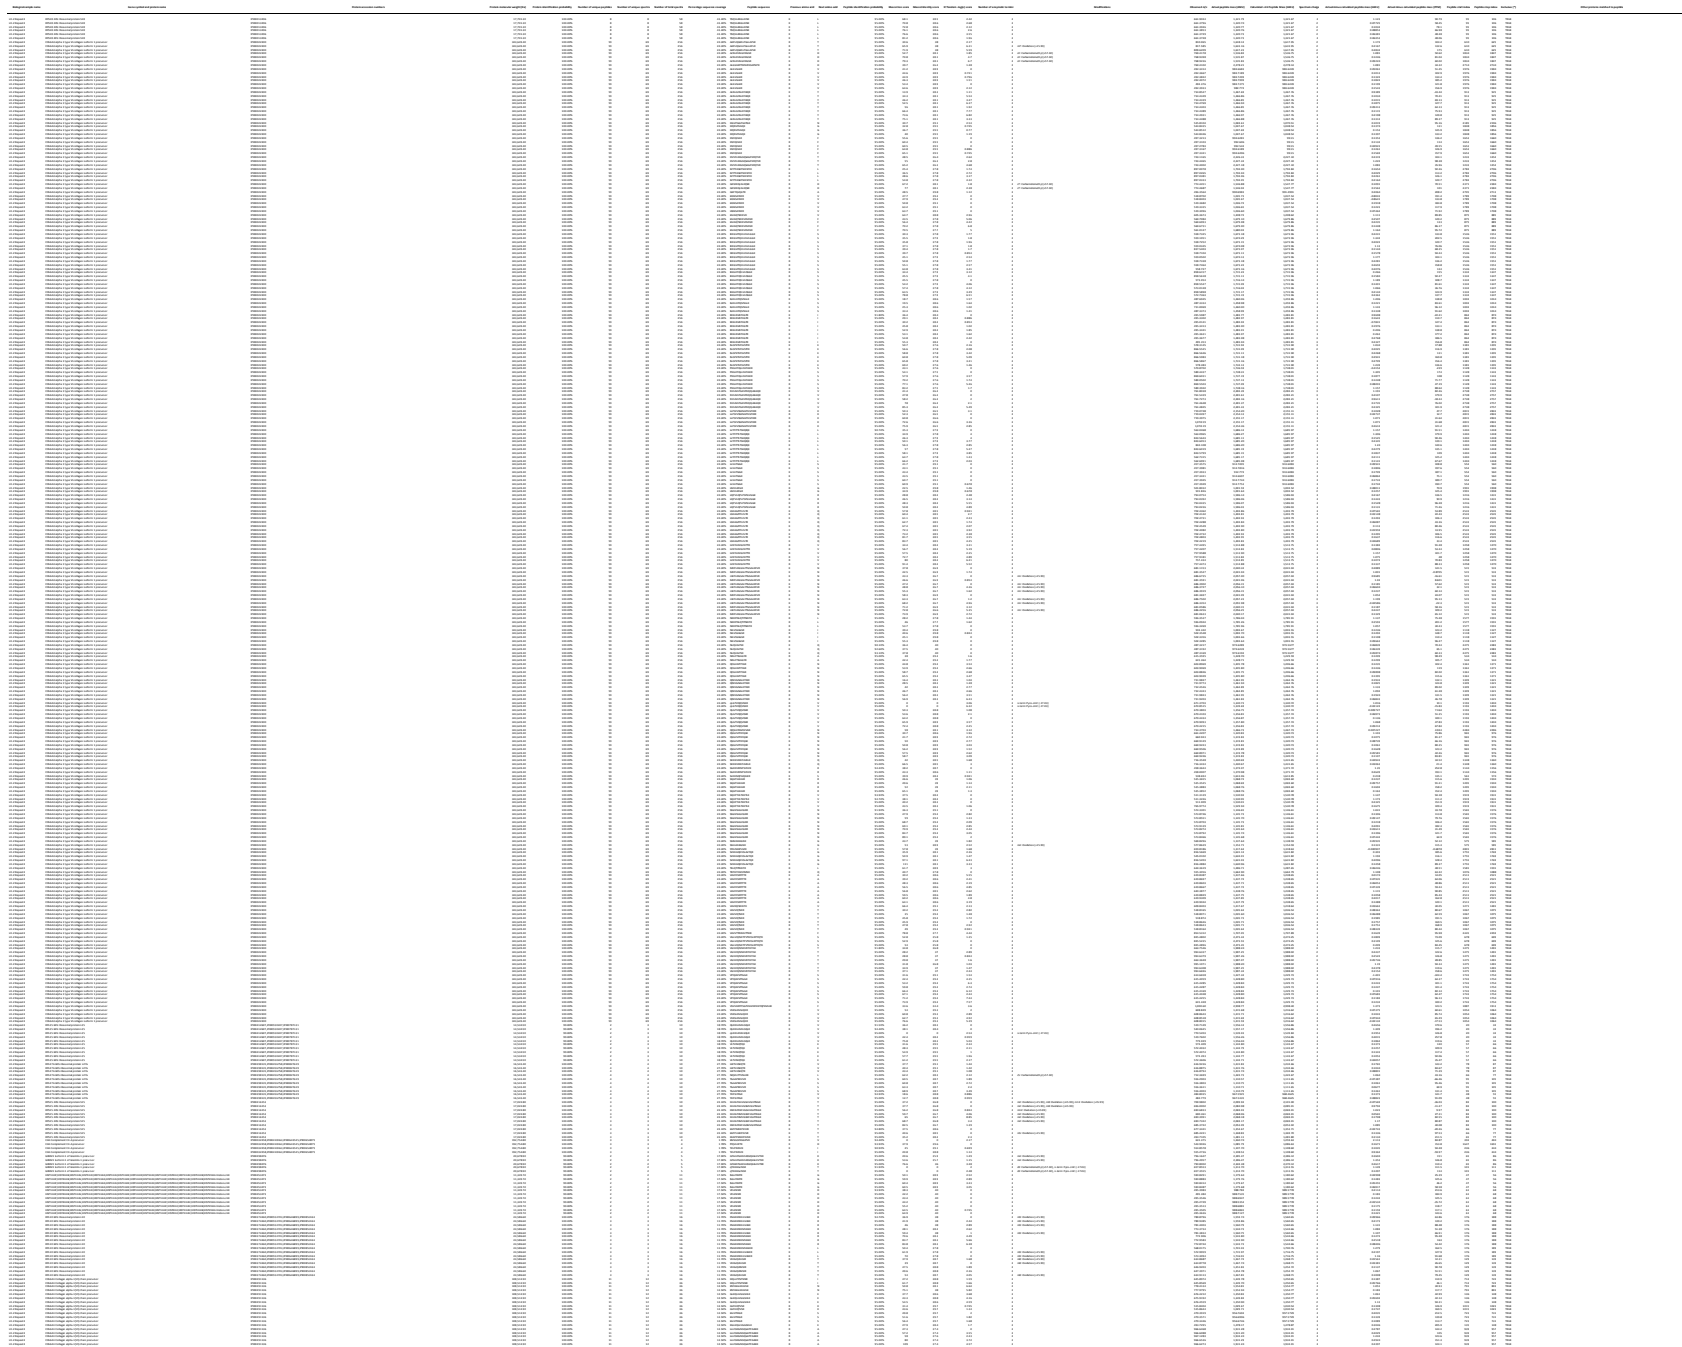



| Item No. | Description | Quantity | Unit | Rate | Total |
|----------|-------------|----------|------|------|-------|
| 1        | ...         | ...      | ...  | ...  | ...   |
| 2        | ...         | ...      | ...  | ...  | ...   |
| 3        | ...         | ...      | ...  | ...  | ...   |
| 4        | ...         | ...      | ...  | ...  | ...   |
| 5        | ...         | ...      | ...  | ...  | ...   |
| 6        | ...         | ...      | ...  | ...  | ...   |
| 7        | ...         | ...      | ...  | ...  | ...   |
| 8        | ...         | ...      | ...  | ...  | ...   |
| 9        | ...         | ...      | ...  | ...  | ...   |
| 10       | ...         | ...      | ...  | ...  | ...   |
| 11       | ...         | ...      | ...  | ...  | ...   |
| 12       | ...         | ...      | ...  | ...  | ...   |
| 13       | ...         | ...      | ...  | ...  | ...   |
| 14       | ...         | ...      | ...  | ...  | ...   |
| 15       | ...         | ...      | ...  | ...  | ...   |
| 16       | ...         | ...      | ...  | ...  | ...   |
| 17       | ...         | ...      | ...  | ...  | ...   |
| 18       | ...         | ...      | ...  | ...  | ...   |
| 19       | ...         | ...      | ...  | ...  | ...   |
| 20       | ...         | ...      | ...  | ...  | ...   |
| 21       | ...         | ...      | ...  | ...  | ...   |
| 22       | ...         | ...      | ...  | ...  | ...   |
| 23       | ...         | ...      | ...  | ...  | ...   |
| 24       | ...         | ...      | ...  | ...  | ...   |
| 25       | ...         | ...      | ...  | ...  | ...   |
| 26       | ...         | ...      | ...  | ...  | ...   |
| 27       | ...         | ...      | ...  | ...  | ...   |
| 28       | ...         | ...      | ...  | ...  | ...   |
| 29       | ...         | ...      | ...  | ...  | ...   |
| 30       | ...         | ...      | ...  | ...  | ...   |
| 31       | ...         | ...      | ...  | ...  | ...   |
| 32       | ...         | ...      | ...  | ...  | ...   |
| 33       | ...         | ...      | ...  | ...  | ...   |
| 34       | ...         | ...      | ...  | ...  | ...   |
| 35       | ...         | ...      | ...  | ...  | ...   |
| 36       | ...         | ...      | ...  | ...  | ...   |
| 37       | ...         | ...      | ...  | ...  | ...   |
| 38       | ...         | ...      | ...  | ...  | ...   |
| 39       | ...         | ...      | ...  | ...  | ...   |
| 40       | ...         | ...      | ...  | ...  | ...   |
| 41       | ...         | ...      | ...  | ...  | ...   |
| 42       | ...         | ...      | ...  | ...  | ...   |
| 43       | ...         | ...      | ...  | ...  | ...   |
| 44       | ...         | ...      | ...  | ...  | ...   |
| 45       | ...         | ...      | ...  | ...  | ...   |
| 46       | ...         | ...      | ...  | ...  | ...   |
| 47       | ...         | ...      | ...  | ...  | ...   |
| 48       | ...         | ...      | ...  | ...  | ...   |
| 49       | ...         | ...      | ...  | ...  | ...   |
| 50       | ...         | ...      | ...  | ...  | ...   |
| 51       | ...         | ...      | ...  | ...  | ...   |
| 52       | ...         | ...      | ...  | ...  | ...   |
| 53       | ...         | ...      | ...  | ...  | ...   |
| 54       | ...         | ...      | ...  | ...  | ...   |
| 55       | ...         | ...      | ...  | ...  | ...   |
| 56       | ...         | ...      | ...  | ...  | ...   |
| 57       | ...         | ...      | ...  | ...  | ...   |
| 58       | ...         | ...      | ...  | ...  | ...   |
| 59       | ...         | ...      | ...  | ...  | ...   |
| 60       | ...         | ...      | ...  | ...  | ...   |
| 61       | ...         | ...      | ...  | ...  | ...   |
| 62       | ...         | ...      | ...  | ...  | ...   |
| 63       | ...         | ...      | ...  | ...  | ...   |
| 64       | ...         | ...      | ...  | ...  | ...   |
| 65       | ...         | ...      | ...  | ...  | ...   |
| 66       | ...         | ...      | ...  | ...  | ...   |
| 67       | ...         | ...      | ...  | ...  | ...   |
| 68       | ...         | ...      | ...  | ...  | ...   |
| 69       | ...         | ...      | ...  | ...  | ...   |
| 70       | ...         | ...      | ...  | ...  | ...   |
| 71       | ...         | ...      | ...  | ...  | ...   |
| 72       | ...         | ...      | ...  | ...  | ...   |
| 73       | ...         | ...      | ...  | ...  | ...   |
| 74       | ...         | ...      | ...  | ...  | ...   |
| 75       | ...         | ...      | ...  | ...  | ...   |
| 76       | ...         | ...      | ...  | ...  | ...   |
| 77       | ...         | ...      | ...  | ...  | ...   |
| 78       | ...         | ...      | ...  | ...  | ...   |
| 79       | ...         | ...      | ...  | ...  | ...   |
| 80       | ...         | ...      | ...  | ...  | ...   |
| 81       | ...         | ...      | ...  | ...  | ...   |
| 82       | ...         | ...      | ...  | ...  | ...   |
| 83       | ...         | ...      | ...  | ...  | ...   |
| 84       | ...         | ...      | ...  | ...  | ...   |
| 85       | ...         | ...      | ...  | ...  | ...   |
| 86       | ...         | ...      | ...  | ...  | ...   |
| 87       | ...         | ...      | ...  | ...  | ...   |
| 88       | ...         | ...      | ...  | ...  | ...   |
| 89       | ...         | ...      | ...  | ...  | ...   |
| 90       | ...         | ...      | ...  | ...  | ...   |
| 91       | ...         | ...      | ...  | ...  | ...   |
| 92       | ...         | ...      | ...  | ...  | ...   |
| 93       | ...         | ...      | ...  | ...  | ...   |
| 94       | ...         | ...      | ...  | ...  | ...   |
| 95       | ...         | ...      | ...  | ...  | ...   |
| 96       | ...         | ...      | ...  | ...  | ...   |
| 97       | ...         | ...      | ...  | ...  | ...   |
| 98       | ...         | ...      | ...  | ...  | ...   |
| 99       | ...         | ...      | ...  | ...  | ...   |
| 100      | ...         | ...      | ...  | ...  | ...   |

The image displays a highly dense and illegible table or spreadsheet. The text is extremely small and tightly packed, likely due to a scanning artifact or a very small font size. The layout appears to consist of numerous columns and rows, with some darker, more concentrated areas of text in the upper left and middle sections, and a distinct vertical column of text on the right side. Due to the resolution and density, no specific data points, headers, or labels can be discerned.



| Item No. | Description | Quantity | Unit | Rate | Amount |
|----------|-------------|----------|------|------|--------|
| 1        | ...         | ...      | ...  | ...  | ...    |
| 2        | ...         | ...      | ...  | ...  | ...    |
| 3        | ...         | ...      | ...  | ...  | ...    |
| 4        | ...         | ...      | ...  | ...  | ...    |
| 5        | ...         | ...      | ...  | ...  | ...    |
| 6        | ...         | ...      | ...  | ...  | ...    |
| 7        | ...         | ...      | ...  | ...  | ...    |
| 8        | ...         | ...      | ...  | ...  | ...    |
| 9        | ...         | ...      | ...  | ...  | ...    |
| 10       | ...         | ...      | ...  | ...  | ...    |
| 11       | ...         | ...      | ...  | ...  | ...    |
| 12       | ...         | ...      | ...  | ...  | ...    |
| 13       | ...         | ...      | ...  | ...  | ...    |
| 14       | ...         | ...      | ...  | ...  | ...    |
| 15       | ...         | ...      | ...  | ...  | ...    |
| 16       | ...         | ...      | ...  | ...  | ...    |
| 17       | ...         | ...      | ...  | ...  | ...    |
| 18       | ...         | ...      | ...  | ...  | ...    |
| 19       | ...         | ...      | ...  | ...  | ...    |
| 20       | ...         | ...      | ...  | ...  | ...    |
| 21       | ...         | ...      | ...  | ...  | ...    |
| 22       | ...         | ...      | ...  | ...  | ...    |
| 23       | ...         | ...      | ...  | ...  | ...    |
| 24       | ...         | ...      | ...  | ...  | ...    |
| 25       | ...         | ...      | ...  | ...  | ...    |
| 26       | ...         | ...      | ...  | ...  | ...    |
| 27       | ...         | ...      | ...  | ...  | ...    |
| 28       | ...         | ...      | ...  | ...  | ...    |
| 29       | ...         | ...      | ...  | ...  | ...    |
| 30       | ...         | ...      | ...  | ...  | ...    |
| 31       | ...         | ...      | ...  | ...  | ...    |
| 32       | ...         | ...      | ...  | ...  | ...    |
| 33       | ...         | ...      | ...  | ...  | ...    |
| 34       | ...         | ...      | ...  | ...  | ...    |
| 35       | ...         | ...      | ...  | ...  | ...    |
| 36       | ...         | ...      | ...  | ...  | ...    |
| 37       | ...         | ...      | ...  | ...  | ...    |
| 38       | ...         | ...      | ...  | ...  | ...    |
| 39       | ...         | ...      | ...  | ...  | ...    |
| 40       | ...         | ...      | ...  | ...  | ...    |
| 41       | ...         | ...      | ...  | ...  | ...    |
| 42       | ...         | ...      | ...  | ...  | ...    |
| 43       | ...         | ...      | ...  | ...  | ...    |
| 44       | ...         | ...      | ...  | ...  | ...    |
| 45       | ...         | ...      | ...  | ...  | ...    |
| 46       | ...         | ...      | ...  | ...  | ...    |
| 47       | ...         | ...      | ...  | ...  | ...    |
| 48       | ...         | ...      | ...  | ...  | ...    |
| 49       | ...         | ...      | ...  | ...  | ...    |
| 50       | ...         | ...      | ...  | ...  | ...    |
| 51       | ...         | ...      | ...  | ...  | ...    |
| 52       | ...         | ...      | ...  | ...  | ...    |
| 53       | ...         | ...      | ...  | ...  | ...    |
| 54       | ...         | ...      | ...  | ...  | ...    |
| 55       | ...         | ...      | ...  | ...  | ...    |
| 56       | ...         | ...      | ...  | ...  | ...    |
| 57       | ...         | ...      | ...  | ...  | ...    |
| 58       | ...         | ...      | ...  | ...  | ...    |
| 59       | ...         | ...      | ...  | ...  | ...    |
| 60       | ...         | ...      | ...  | ...  | ...    |
| 61       | ...         | ...      | ...  | ...  | ...    |
| 62       | ...         | ...      | ...  | ...  | ...    |
| 63       | ...         | ...      | ...  | ...  | ...    |
| 64       | ...         | ...      | ...  | ...  | ...    |
| 65       | ...         | ...      | ...  | ...  | ...    |
| 66       | ...         | ...      | ...  | ...  | ...    |
| 67       | ...         | ...      | ...  | ...  | ...    |
| 68       | ...         | ...      | ...  | ...  | ...    |
| 69       | ...         | ...      | ...  | ...  | ...    |
| 70       | ...         | ...      | ...  | ...  | ...    |
| 71       | ...         | ...      | ...  | ...  | ...    |
| 72       | ...         | ...      | ...  | ...  | ...    |
| 73       | ...         | ...      | ...  | ...  | ...    |
| 74       | ...         | ...      | ...  | ...  | ...    |
| 75       | ...         | ...      | ...  | ...  | ...    |
| 76       | ...         | ...      | ...  | ...  | ...    |
| 77       | ...         | ...      | ...  | ...  | ...    |
| 78       | ...         | ...      | ...  | ...  | ...    |
| 79       | ...         | ...      | ...  | ...  | ...    |
| 80       | ...         | ...      | ...  | ...  | ...    |
| 81       | ...         | ...      | ...  | ...  | ...    |
| 82       | ...         | ...      | ...  | ...  | ...    |
| 83       | ...         | ...      | ...  | ...  | ...    |
| 84       | ...         | ...      | ...  | ...  | ...    |
| 85       | ...         | ...      | ...  | ...  | ...    |
| 86       | ...         | ...      | ...  | ...  | ...    |
| 87       | ...         | ...      | ...  | ...  | ...    |
| 88       | ...         | ...      | ...  | ...  | ...    |
| 89       | ...         | ...      | ...  | ...  | ...    |
| 90       | ...         | ...      | ...  | ...  | ...    |
| 91       | ...         | ...      | ...  | ...  | ...    |
| 92       | ...         | ...      | ...  | ...  | ...    |
| 93       | ...         | ...      | ...  | ...  | ...    |
| 94       | ...         | ...      | ...  | ...  | ...    |
| 95       | ...         | ...      | ...  | ...  | ...    |
| 96       | ...         | ...      | ...  | ...  | ...    |
| 97       | ...         | ...      | ...  | ...  | ...    |
| 98       | ...         | ...      | ...  | ...  | ...    |
| 99       | ...         | ...      | ...  | ...  | ...    |
| 100      | ...         | ...      | ...  | ...  | ...    |

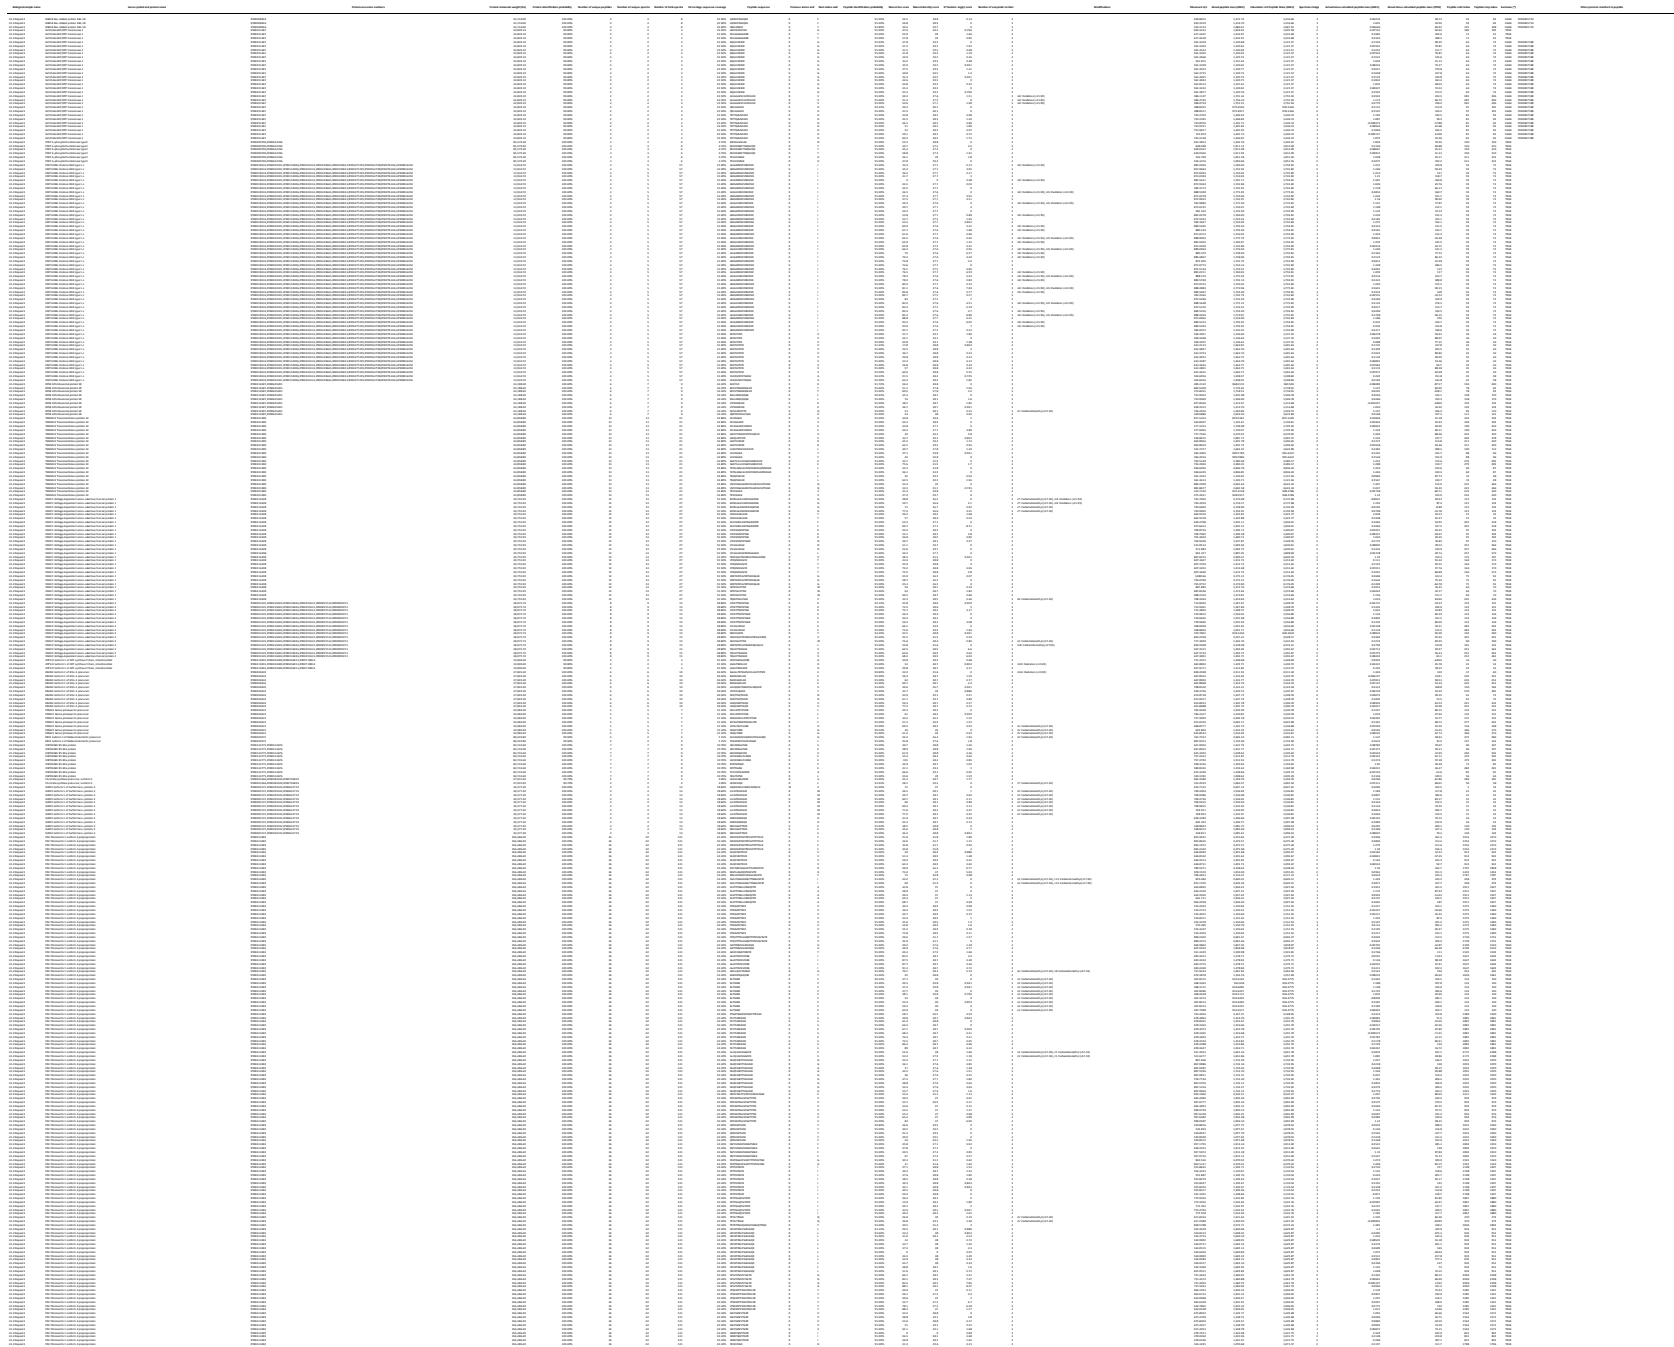

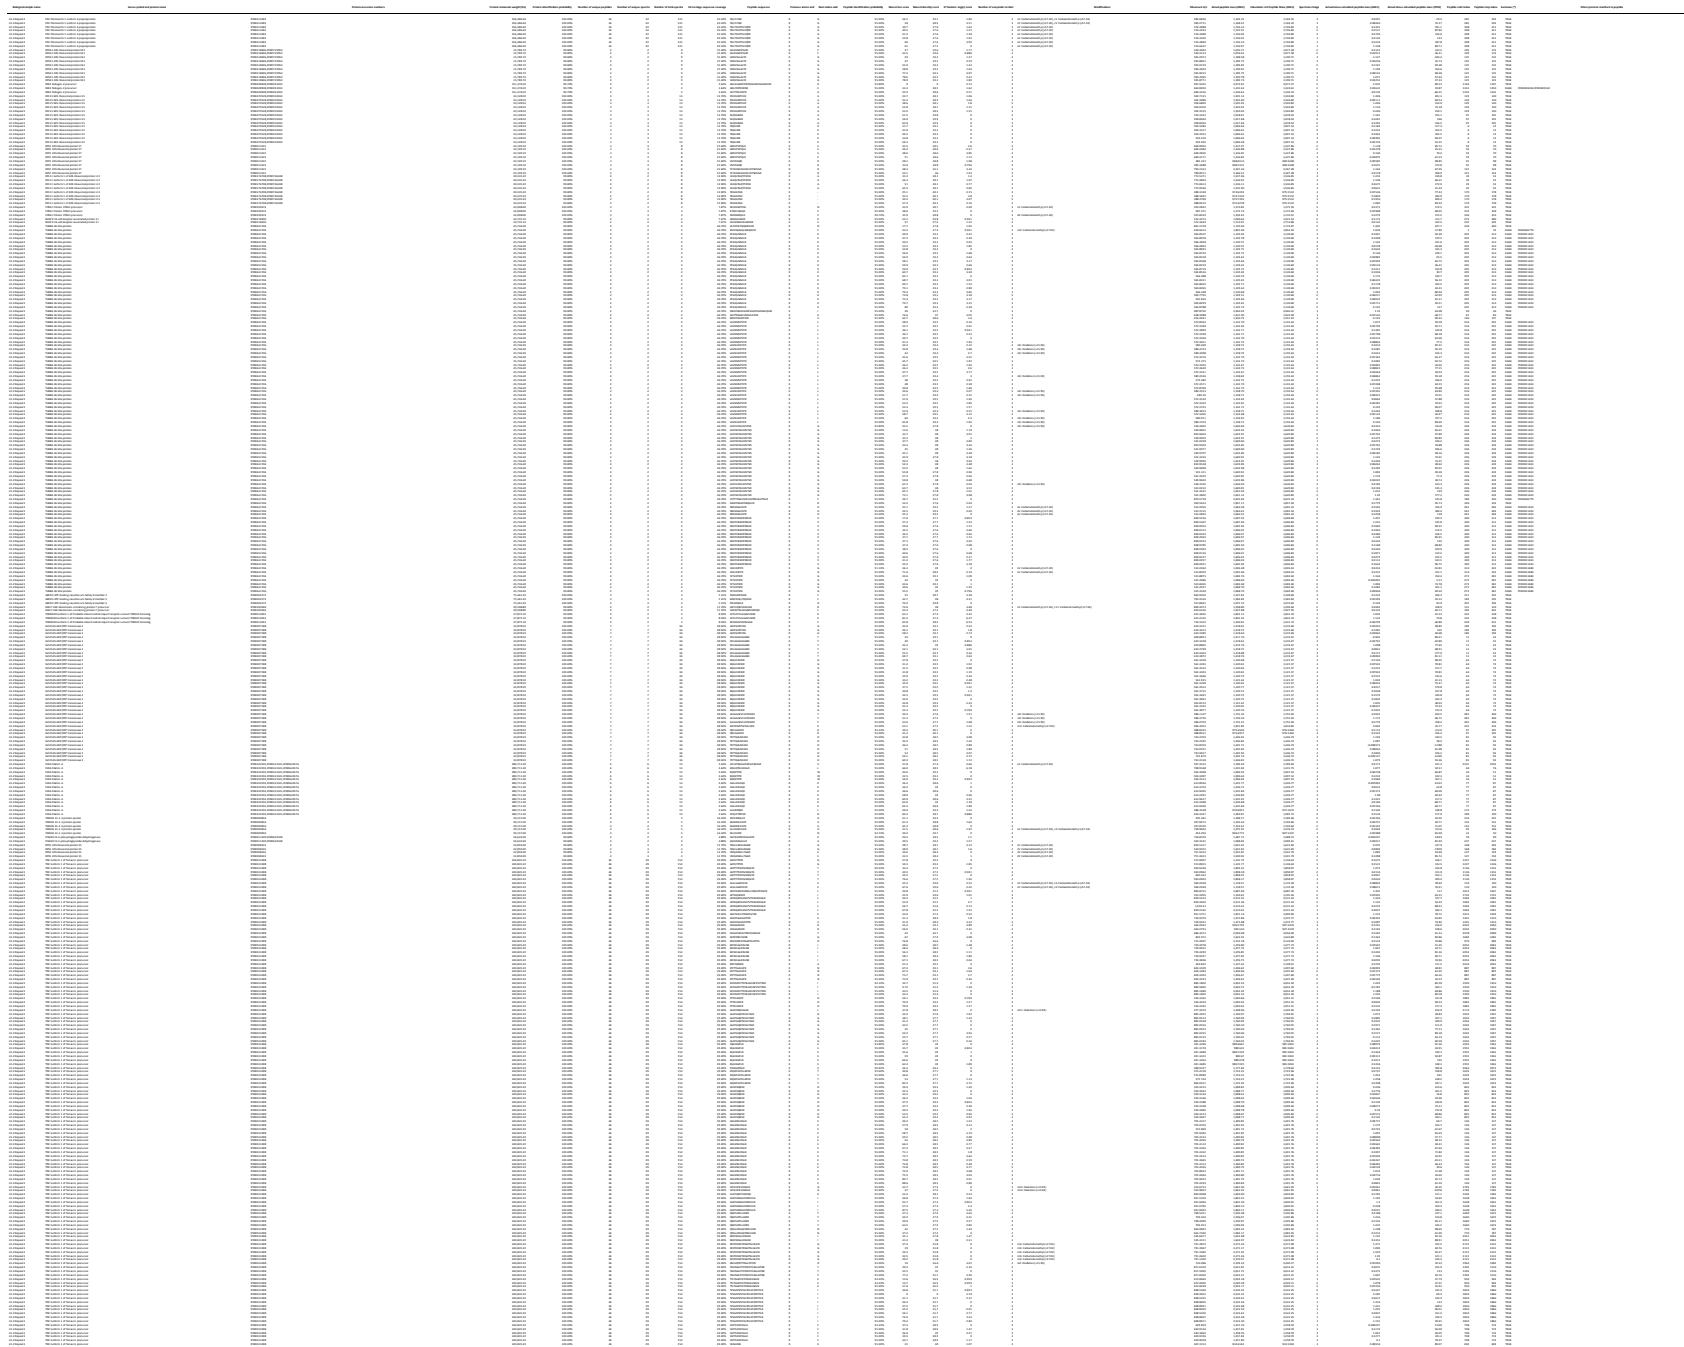

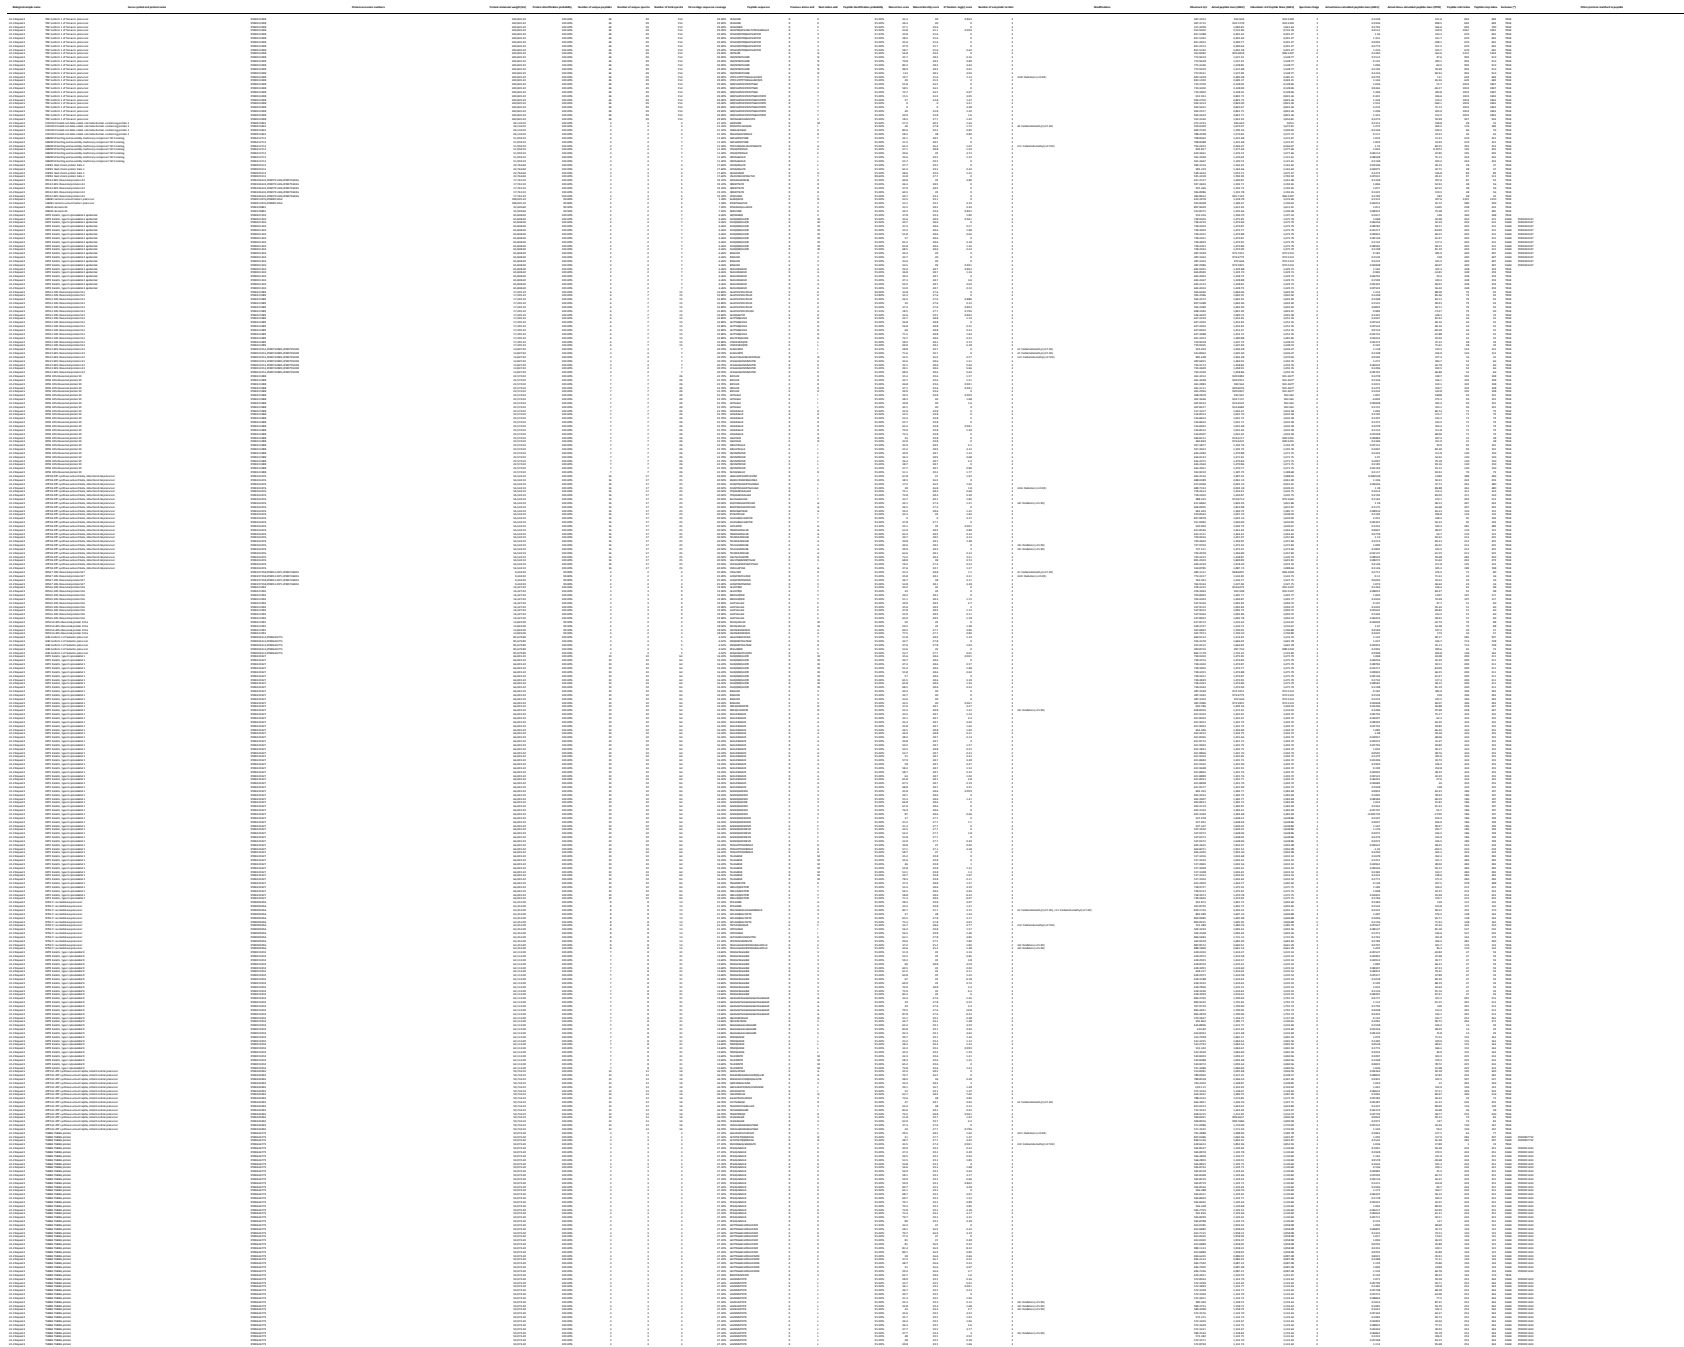

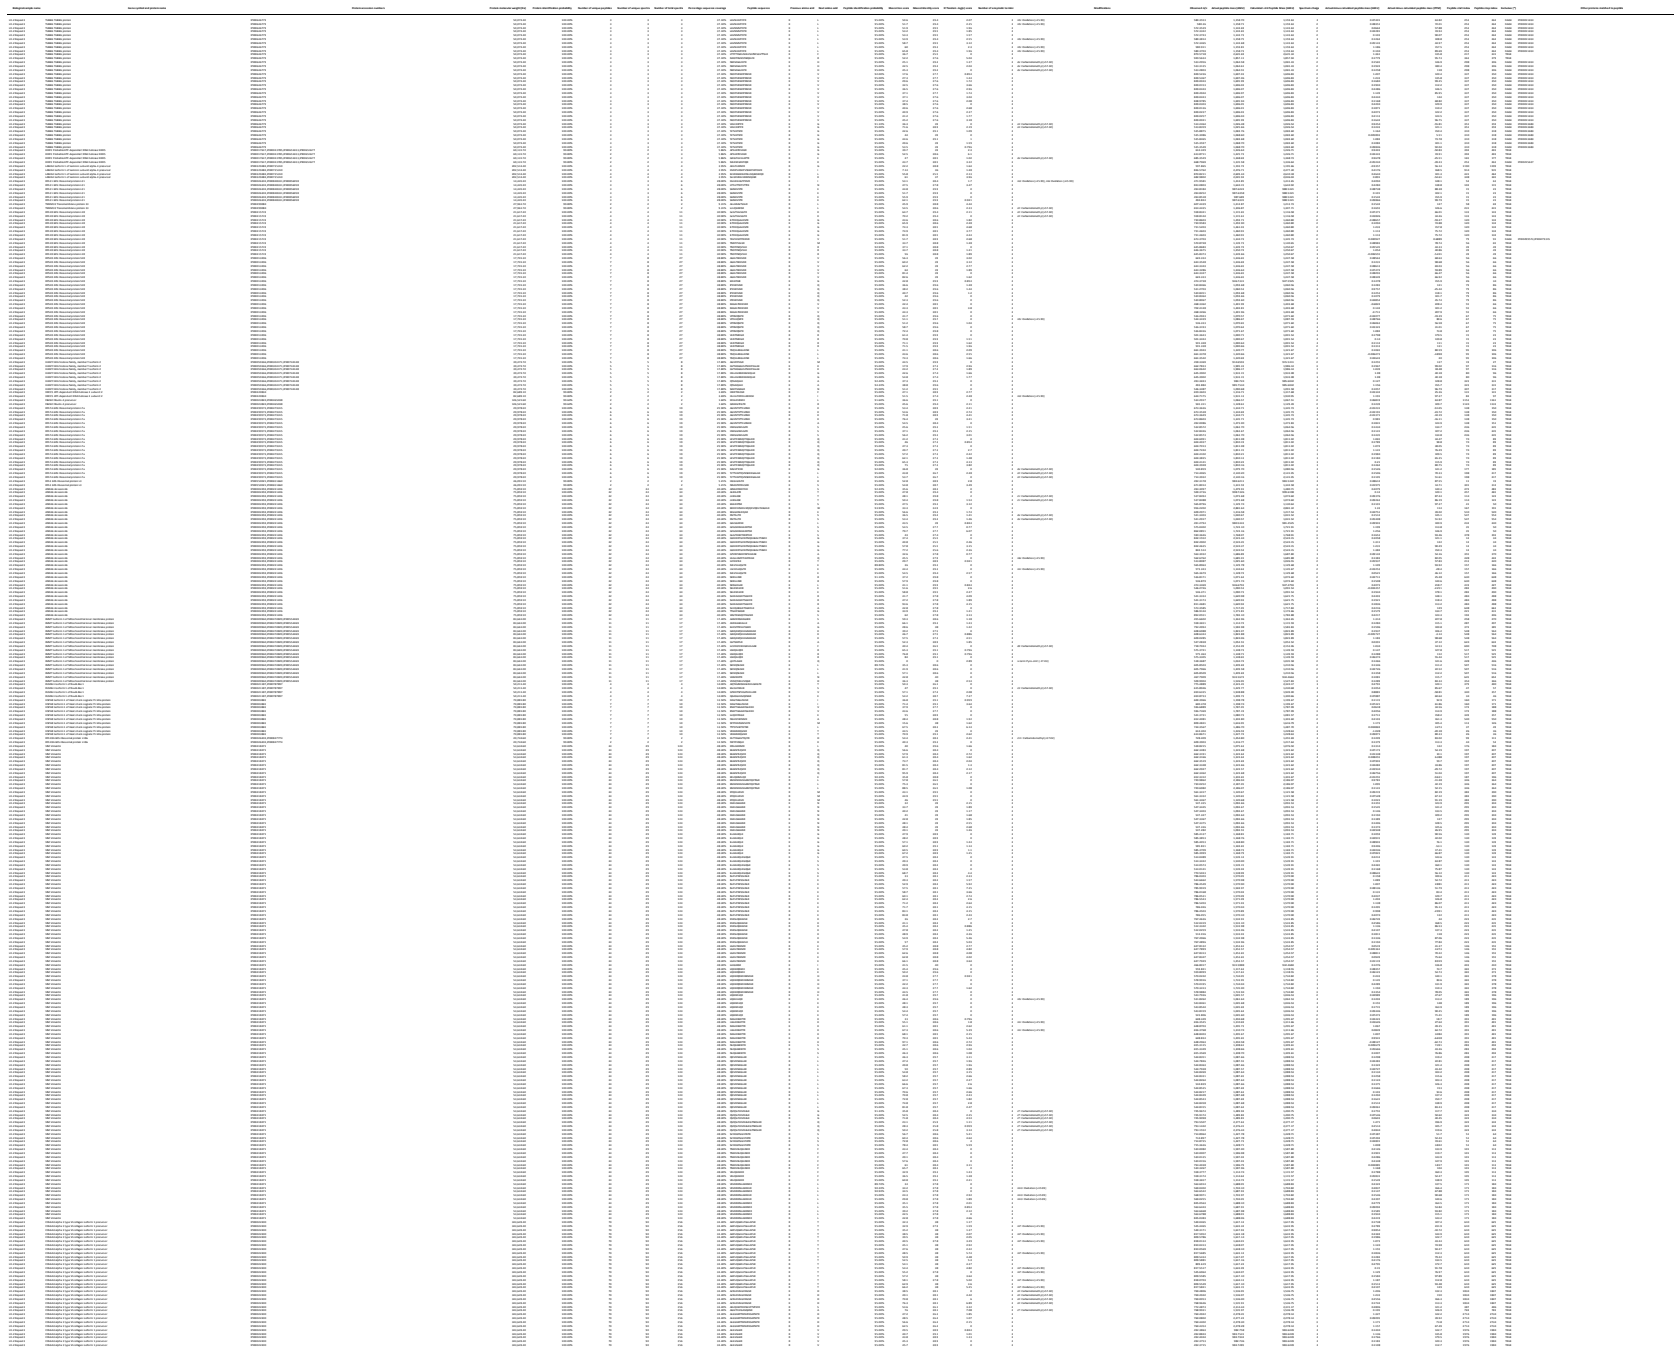

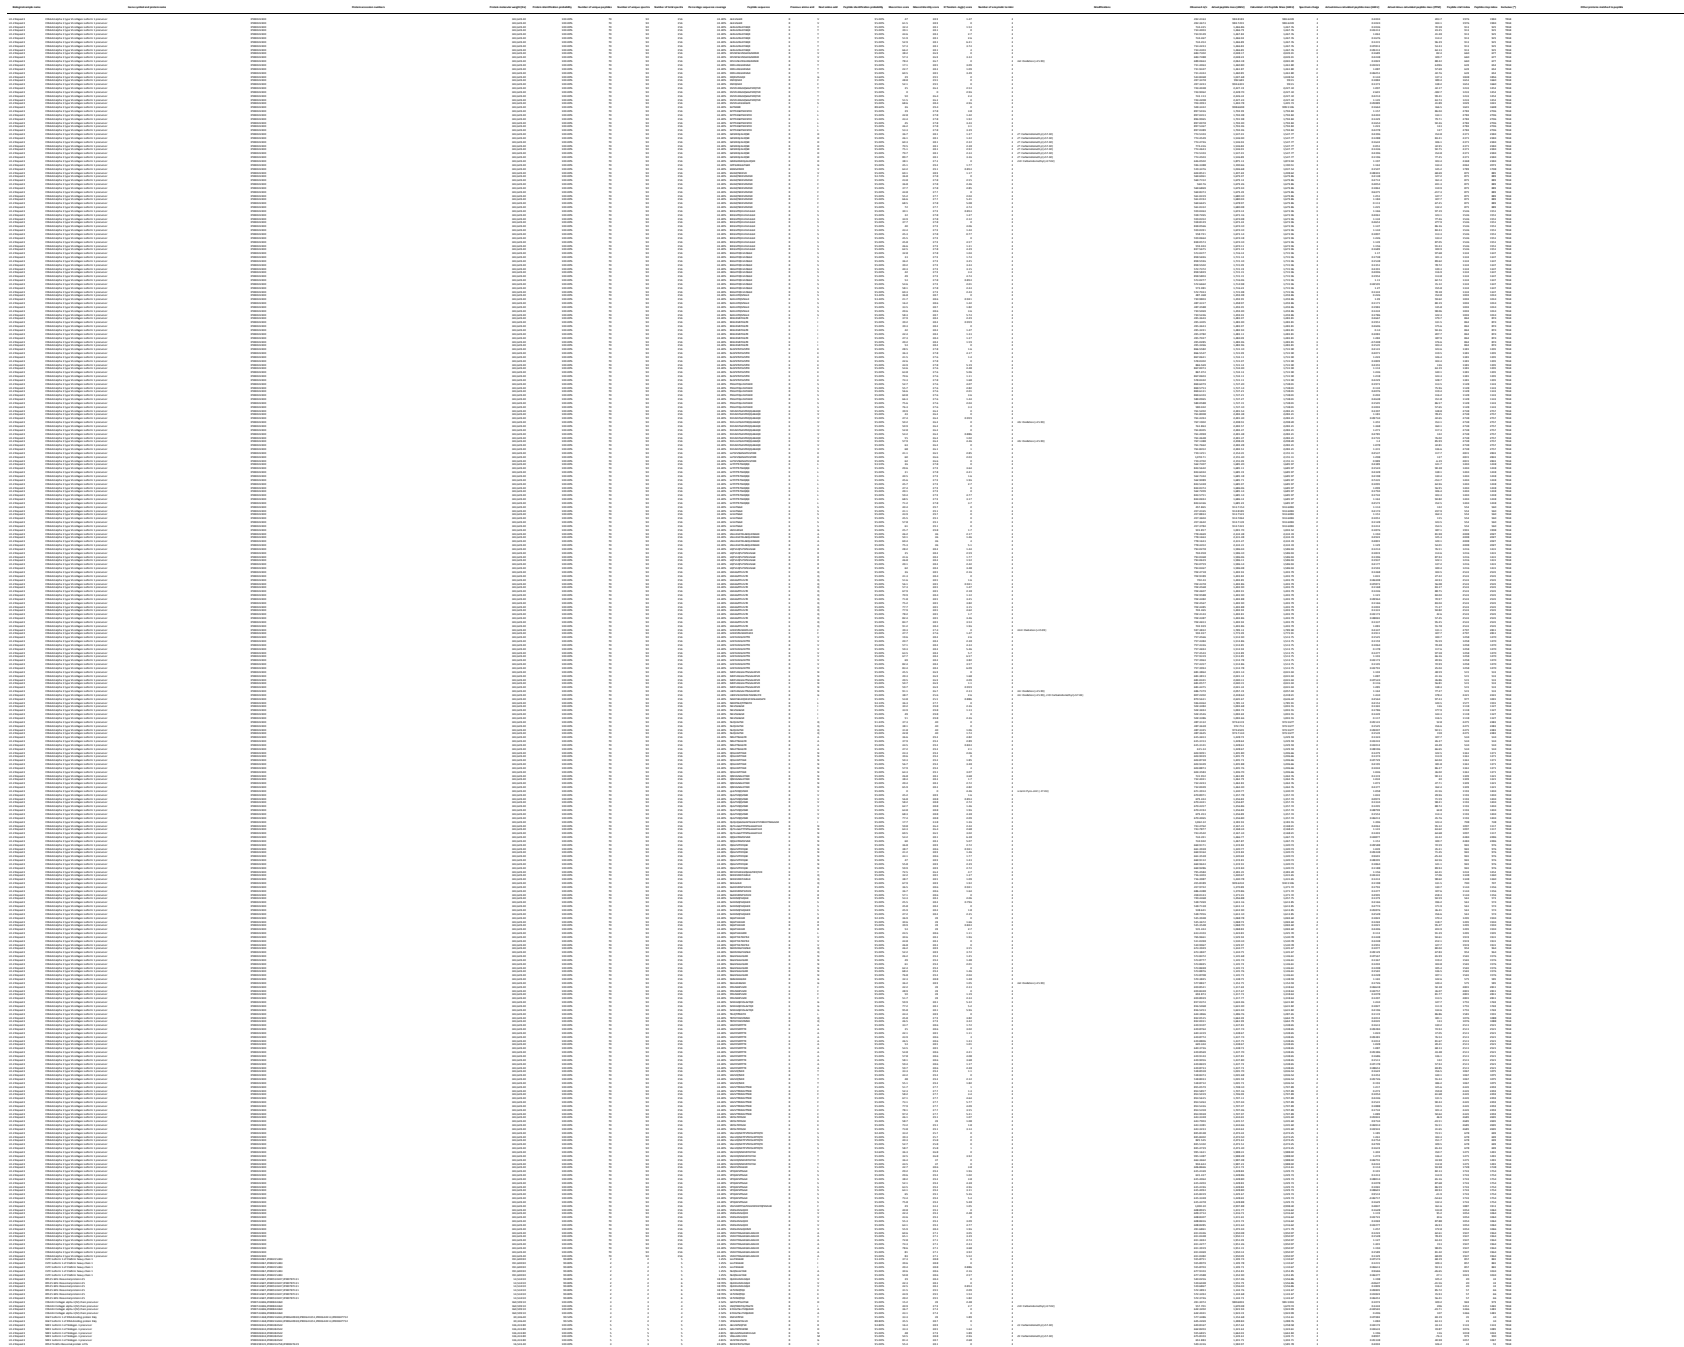

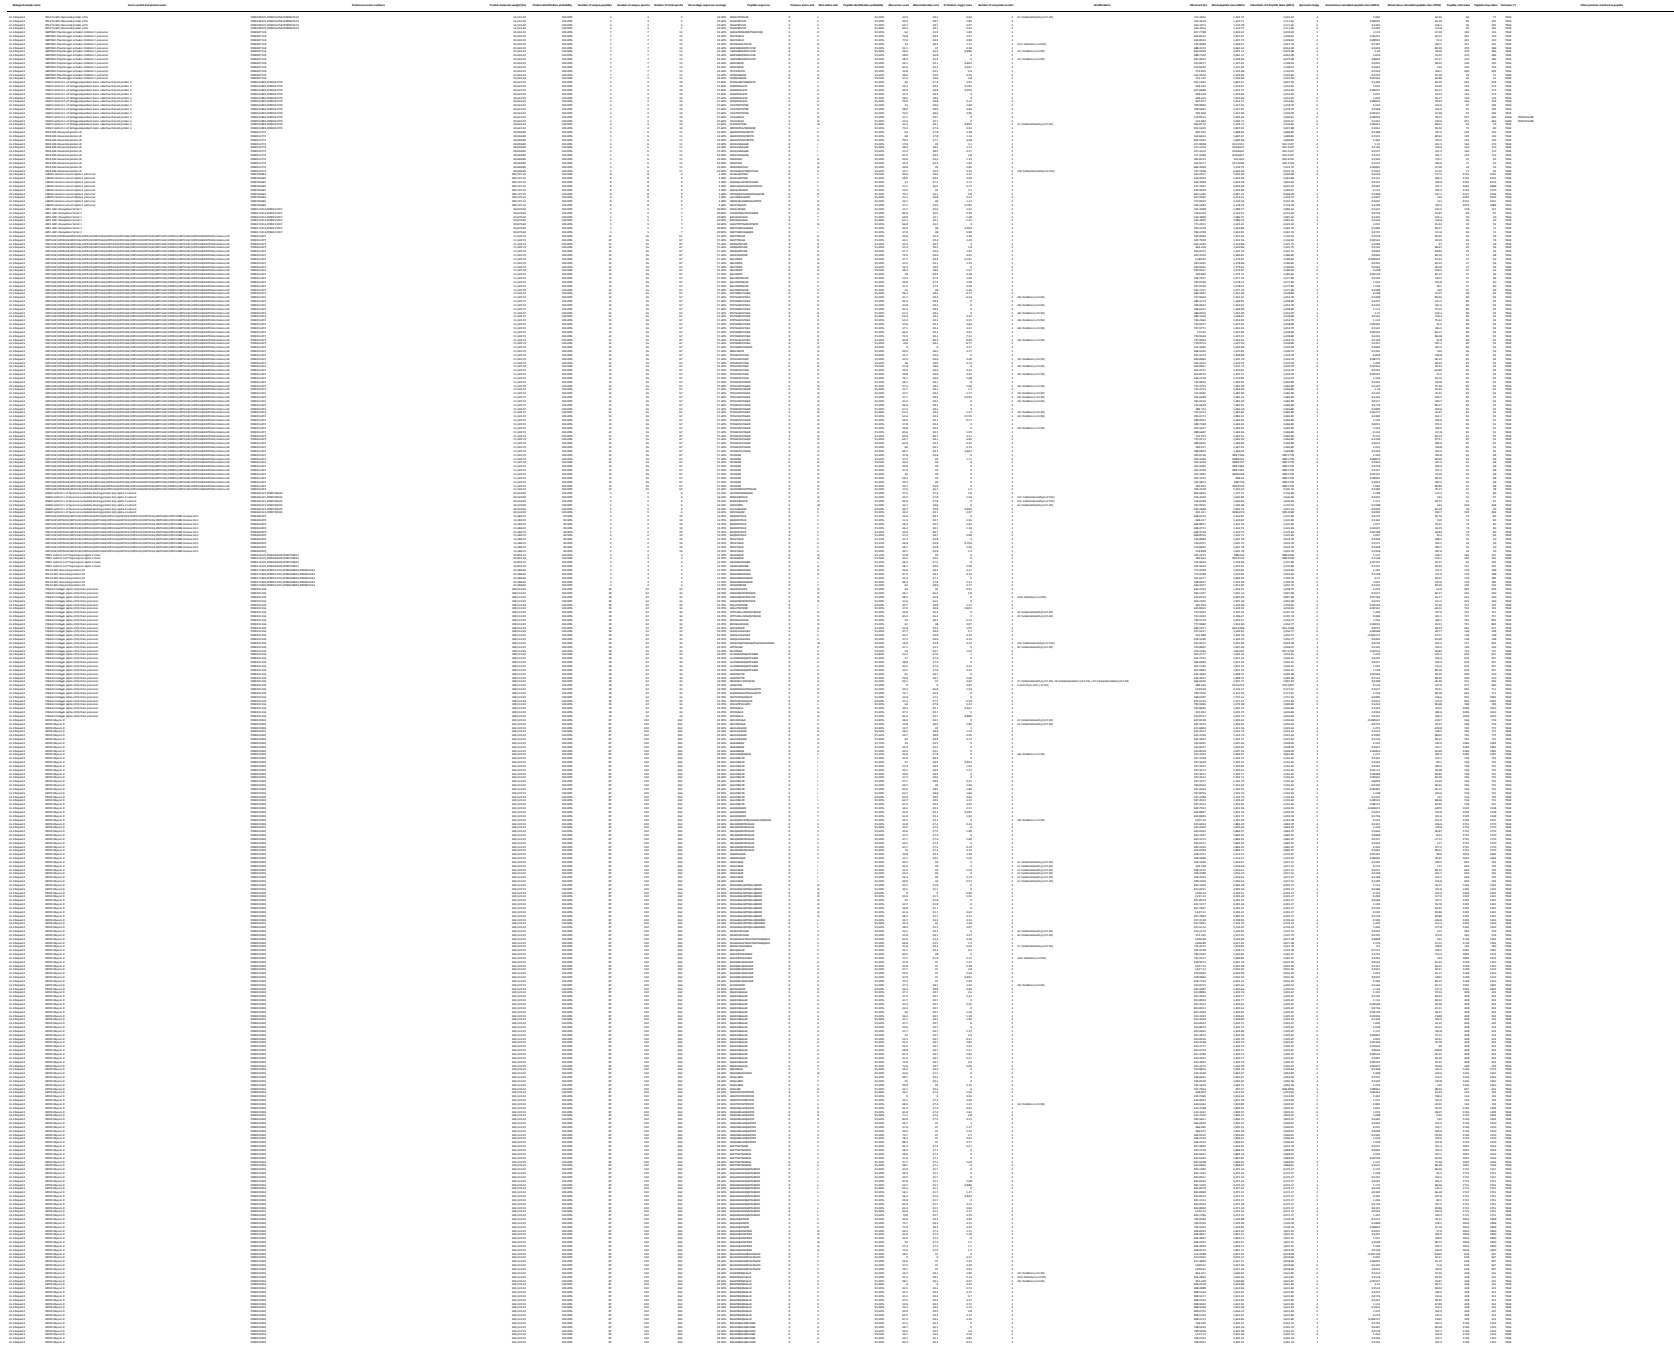

| Number | Name | Address | Phone | Category | Remarks | Area |
|--------|------|---------|-------|----------|---------|------|
| 1      | ...  | ...     | ...   | ...      | ...     | ...  |
| 2      | ...  | ...     | ...   | ...      | ...     | ...  |
| 3      | ...  | ...     | ...   | ...      | ...     | ...  |
| 4      | ...  | ...     | ...   | ...      | ...     | ...  |
| 5      | ...  | ...     | ...   | ...      | ...     | ...  |
| 6      | ...  | ...     | ...   | ...      | ...     | ...  |
| 7      | ...  | ...     | ...   | ...      | ...     | ...  |
| 8      | ...  | ...     | ...   | ...      | ...     | ...  |
| 9      | ...  | ...     | ...   | ...      | ...     | ...  |
| 10     | ...  | ...     | ...   | ...      | ...     | ...  |
| 11     | ...  | ...     | ...   | ...      | ...     | ...  |
| 12     | ...  | ...     | ...   | ...      | ...     | ...  |
| 13     | ...  | ...     | ...   | ...      | ...     | ...  |
| 14     | ...  | ...     | ...   | ...      | ...     | ...  |
| 15     | ...  | ...     | ...   | ...      | ...     | ...  |
| 16     | ...  | ...     | ...   | ...      | ...     | ...  |
| 17     | ...  | ...     | ...   | ...      | ...     | ...  |
| 18     | ...  | ...     | ...   | ...      | ...     | ...  |
| 19     | ...  | ...     | ...   | ...      | ...     | ...  |
| 20     | ...  | ...     | ...   | ...      | ...     | ...  |
| 21     | ...  | ...     | ...   | ...      | ...     | ...  |
| 22     | ...  | ...     | ...   | ...      | ...     | ...  |
| 23     | ...  | ...     | ...   | ...      | ...     | ...  |
| 24     | ...  | ...     | ...   | ...      | ...     | ...  |
| 25     | ...  | ...     | ...   | ...      | ...     | ...  |
| 26     | ...  | ...     | ...   | ...      | ...     | ...  |
| 27     | ...  | ...     | ...   | ...      | ...     | ...  |
| 28     | ...  | ...     | ...   | ...      | ...     | ...  |
| 29     | ...  | ...     | ...   | ...      | ...     | ...  |
| 30     | ...  | ...     | ...   | ...      | ...     | ...  |
| 31     | ...  | ...     | ...   | ...      | ...     | ...  |
| 32     | ...  | ...     | ...   | ...      | ...     | ...  |
| 33     | ...  | ...     | ...   | ...      | ...     | ...  |
| 34     | ...  | ...     | ...   | ...      | ...     | ...  |
| 35     | ...  | ...     | ...   | ...      | ...     | ...  |
| 36     | ...  | ...     | ...   | ...      | ...     | ...  |
| 37     | ...  | ...     | ...   | ...      | ...     | ...  |
| 38     | ...  | ...     | ...   | ...      | ...     | ...  |
| 39     | ...  | ...     | ...   | ...      | ...     | ...  |
| 40     | ...  | ...     | ...   | ...      | ...     | ...  |
| 41     | ...  | ...     | ...   | ...      | ...     | ...  |
| 42     | ...  | ...     | ...   | ...      | ...     | ...  |
| 43     | ...  | ...     | ...   | ...      | ...     | ...  |
| 44     | ...  | ...     | ...   | ...      | ...     | ...  |
| 45     | ...  | ...     | ...   | ...      | ...     | ...  |
| 46     | ...  | ...     | ...   | ...      | ...     | ...  |
| 47     | ...  | ...     | ...   | ...      | ...     | ...  |
| 48     | ...  | ...     | ...   | ...      | ...     | ...  |
| 49     | ...  | ...     | ...   | ...      | ...     | ...  |
| 50     | ...  | ...     | ...   | ...      | ...     | ...  |
| 51     | ...  | ...     | ...   | ...      | ...     | ...  |
| 52     | ...  | ...     | ...   | ...      | ...     | ...  |
| 53     | ...  | ...     | ...   | ...      | ...     | ...  |
| 54     | ...  | ...     | ...   | ...      | ...     | ...  |
| 55     | ...  | ...     | ...   | ...      | ...     | ...  |
| 56     | ...  | ...     | ...   | ...      | ...     | ...  |
| 57     | ...  | ...     | ...   | ...      | ...     | ...  |
| 58     | ...  | ...     | ...   | ...      | ...     | ...  |
| 59     | ...  | ...     | ...   | ...      | ...     | ...  |
| 60     | ...  | ...     | ...   | ...      | ...     | ...  |
| 61     | ...  | ...     | ...   | ...      | ...     | ...  |
| 62     | ...  | ...     | ...   | ...      | ...     | ...  |
| 63     | ...  | ...     | ...   | ...      | ...     | ...  |
| 64     | ...  | ...     | ...   | ...      | ...     | ...  |
| 65     | ...  | ...     | ...   | ...      | ...     | ...  |
| 66     | ...  | ...     | ...   | ...      | ...     | ...  |
| 67     | ...  | ...     | ...   | ...      | ...     | ...  |
| 68     | ...  | ...     | ...   | ...      | ...     | ...  |
| 69     | ...  | ...     | ...   | ...      | ...     | ...  |
| 70     | ...  | ...     | ...   | ...      | ...     | ...  |
| 71     | ...  | ...     | ...   | ...      | ...     | ...  |
| 72     | ...  | ...     | ...   | ...      | ...     | ...  |
| 73     | ...  | ...     | ...   | ...      | ...     | ...  |
| 74     | ...  | ...     | ...   | ...      | ...     | ...  |
| 75     | ...  | ...     | ...   | ...      | ...     | ...  |
| 76     | ...  | ...     | ...   | ...      | ...     | ...  |
| 77     | ...  | ...     | ...   | ...      | ...     | ...  |
| 78     | ...  | ...     | ...   | ...      | ...     | ...  |
| 79     | ...  | ...     | ...   | ...      | ...     | ...  |
| 80     | ...  | ...     | ...   | ...      | ...     | ...  |
| 81     | ...  | ...     | ...   | ...      | ...     | ...  |
| 82     | ...  | ...     | ...   | ...      | ...     | ...  |
| 83     | ...  | ...     | ...   | ...      | ...     | ...  |
| 84     | ...  | ...     | ...   | ...      | ...     | ...  |
| 85     | ...  | ...     | ...   | ...      | ...     | ...  |
| 86     | ...  | ...     | ...   | ...      | ...     | ...  |
| 87     | ...  | ...     | ...   | ...      | ...     | ...  |
| 88     | ...  | ...     | ...   | ...      | ...     | ...  |
| 89     | ...  | ...     | ...   | ...      | ...     | ...  |
| 90     | ...  | ...     | ...   | ...      | ...     | ...  |
| 91     | ...  | ...     | ...   | ...      | ...     | ...  |
| 92     | ...  | ...     | ...   | ...      | ...     | ...  |
| 93     | ...  | ...     | ...   | ...      | ...     | ...  |
| 94     | ...  | ...     | ...   | ...      | ...     | ...  |
| 95     | ...  | ...     | ...   | ...      | ...     | ...  |
| 96     | ...  | ...     | ...   | ...      | ...     | ...  |
| 97     | ...  | ...     | ...   | ...      | ...     | ...  |
| 98     | ...  | ...     | ...   | ...      | ...     | ...  |
| 99     | ...  | ...     | ...   | ...      | ...     | ...  |
| 100    | ...  | ...     | ...   | ...      | ...     | ...  |





Table with multiple columns and rows, containing dense alphanumeric data and some graphical elements like a bar chart.

Table with multiple columns and rows, containing dense text and some graphical elements. The table is oriented vertically on the page.

| Item No. | Description | Quantity | Unit | Rate | Total |
|----------|-------------|----------|------|------|-------|
| 1        | ...         | ...      | ...  | ...  | ...   |
| 2        | ...         | ...      | ...  | ...  | ...   |
| 3        | ...         | ...      | ...  | ...  | ...   |
| 4        | ...         | ...      | ...  | ...  | ...   |
| 5        | ...         | ...      | ...  | ...  | ...   |
| 6        | ...         | ...      | ...  | ...  | ...   |
| 7        | ...         | ...      | ...  | ...  | ...   |
| 8        | ...         | ...      | ...  | ...  | ...   |
| 9        | ...         | ...      | ...  | ...  | ...   |
| 10       | ...         | ...      | ...  | ...  | ...   |
| 11       | ...         | ...      | ...  | ...  | ...   |
| 12       | ...         | ...      | ...  | ...  | ...   |
| 13       | ...         | ...      | ...  | ...  | ...   |
| 14       | ...         | ...      | ...  | ...  | ...   |
| 15       | ...         | ...      | ...  | ...  | ...   |
| 16       | ...         | ...      | ...  | ...  | ...   |
| 17       | ...         | ...      | ...  | ...  | ...   |
| 18       | ...         | ...      | ...  | ...  | ...   |
| 19       | ...         | ...      | ...  | ...  | ...   |
| 20       | ...         | ...      | ...  | ...  | ...   |
| 21       | ...         | ...      | ...  | ...  | ...   |
| 22       | ...         | ...      | ...  | ...  | ...   |
| 23       | ...         | ...      | ...  | ...  | ...   |
| 24       | ...         | ...      | ...  | ...  | ...   |
| 25       | ...         | ...      | ...  | ...  | ...   |
| 26       | ...         | ...      | ...  | ...  | ...   |
| 27       | ...         | ...      | ...  | ...  | ...   |
| 28       | ...         | ...      | ...  | ...  | ...   |
| 29       | ...         | ...      | ...  | ...  | ...   |
| 30       | ...         | ...      | ...  | ...  | ...   |
| 31       | ...         | ...      | ...  | ...  | ...   |
| 32       | ...         | ...      | ...  | ...  | ...   |
| 33       | ...         | ...      | ...  | ...  | ...   |
| 34       | ...         | ...      | ...  | ...  | ...   |
| 35       | ...         | ...      | ...  | ...  | ...   |
| 36       | ...         | ...      | ...  | ...  | ...   |
| 37       | ...         | ...      | ...  | ...  | ...   |
| 38       | ...         | ...      | ...  | ...  | ...   |
| 39       | ...         | ...      | ...  | ...  | ...   |
| 40       | ...         | ...      | ...  | ...  | ...   |
| 41       | ...         | ...      | ...  | ...  | ...   |
| 42       | ...         | ...      | ...  | ...  | ...   |
| 43       | ...         | ...      | ...  | ...  | ...   |
| 44       | ...         | ...      | ...  | ...  | ...   |
| 45       | ...         | ...      | ...  | ...  | ...   |
| 46       | ...         | ...      | ...  | ...  | ...   |
| 47       | ...         | ...      | ...  | ...  | ...   |
| 48       | ...         | ...      | ...  | ...  | ...   |
| 49       | ...         | ...      | ...  | ...  | ...   |
| 50       | ...         | ...      | ...  | ...  | ...   |
| 51       | ...         | ...      | ...  | ...  | ...   |
| 52       | ...         | ...      | ...  | ...  | ...   |
| 53       | ...         | ...      | ...  | ...  | ...   |
| 54       | ...         | ...      | ...  | ...  | ...   |
| 55       | ...         | ...      | ...  | ...  | ...   |
| 56       | ...         | ...      | ...  | ...  | ...   |
| 57       | ...         | ...      | ...  | ...  | ...   |
| 58       | ...         | ...      | ...  | ...  | ...   |
| 59       | ...         | ...      | ...  | ...  | ...   |
| 60       | ...         | ...      | ...  | ...  | ...   |
| 61       | ...         | ...      | ...  | ...  | ...   |
| 62       | ...         | ...      | ...  | ...  | ...   |
| 63       | ...         | ...      | ...  | ...  | ...   |
| 64       | ...         | ...      | ...  | ...  | ...   |
| 65       | ...         | ...      | ...  | ...  | ...   |
| 66       | ...         | ...      | ...  | ...  | ...   |
| 67       | ...         | ...      | ...  | ...  | ...   |
| 68       | ...         | ...      | ...  | ...  | ...   |
| 69       | ...         | ...      | ...  | ...  | ...   |
| 70       | ...         | ...      | ...  | ...  | ...   |
| 71       | ...         | ...      | ...  | ...  | ...   |
| 72       | ...         | ...      | ...  | ...  | ...   |
| 73       | ...         | ...      | ...  | ...  | ...   |
| 74       | ...         | ...      | ...  | ...  | ...   |
| 75       | ...         | ...      | ...  | ...  | ...   |
| 76       | ...         | ...      | ...  | ...  | ...   |
| 77       | ...         | ...      | ...  | ...  | ...   |
| 78       | ...         | ...      | ...  | ...  | ...   |
| 79       | ...         | ...      | ...  | ...  | ...   |
| 80       | ...         | ...      | ...  | ...  | ...   |
| 81       | ...         | ...      | ...  | ...  | ...   |
| 82       | ...         | ...      | ...  | ...  | ...   |
| 83       | ...         | ...      | ...  | ...  | ...   |
| 84       | ...         | ...      | ...  | ...  | ...   |
| 85       | ...         | ...      | ...  | ...  | ...   |
| 86       | ...         | ...      | ...  | ...  | ...   |
| 87       | ...         | ...      | ...  | ...  | ...   |
| 88       | ...         | ...      | ...  | ...  | ...   |
| 89       | ...         | ...      | ...  | ...  | ...   |
| 90       | ...         | ...      | ...  | ...  | ...   |
| 91       | ...         | ...      | ...  | ...  | ...   |
| 92       | ...         | ...      | ...  | ...  | ...   |
| 93       | ...         | ...      | ...  | ...  | ...   |
| 94       | ...         | ...      | ...  | ...  | ...   |
| 95       | ...         | ...      | ...  | ...  | ...   |
| 96       | ...         | ...      | ...  | ...  | ...   |
| 97       | ...         | ...      | ...  | ...  | ...   |
| 98       | ...         | ...      | ...  | ...  | ...   |
| 99       | ...         | ...      | ...  | ...  | ...   |
| 100      | ...         | ...      | ...  | ...  | ...   |

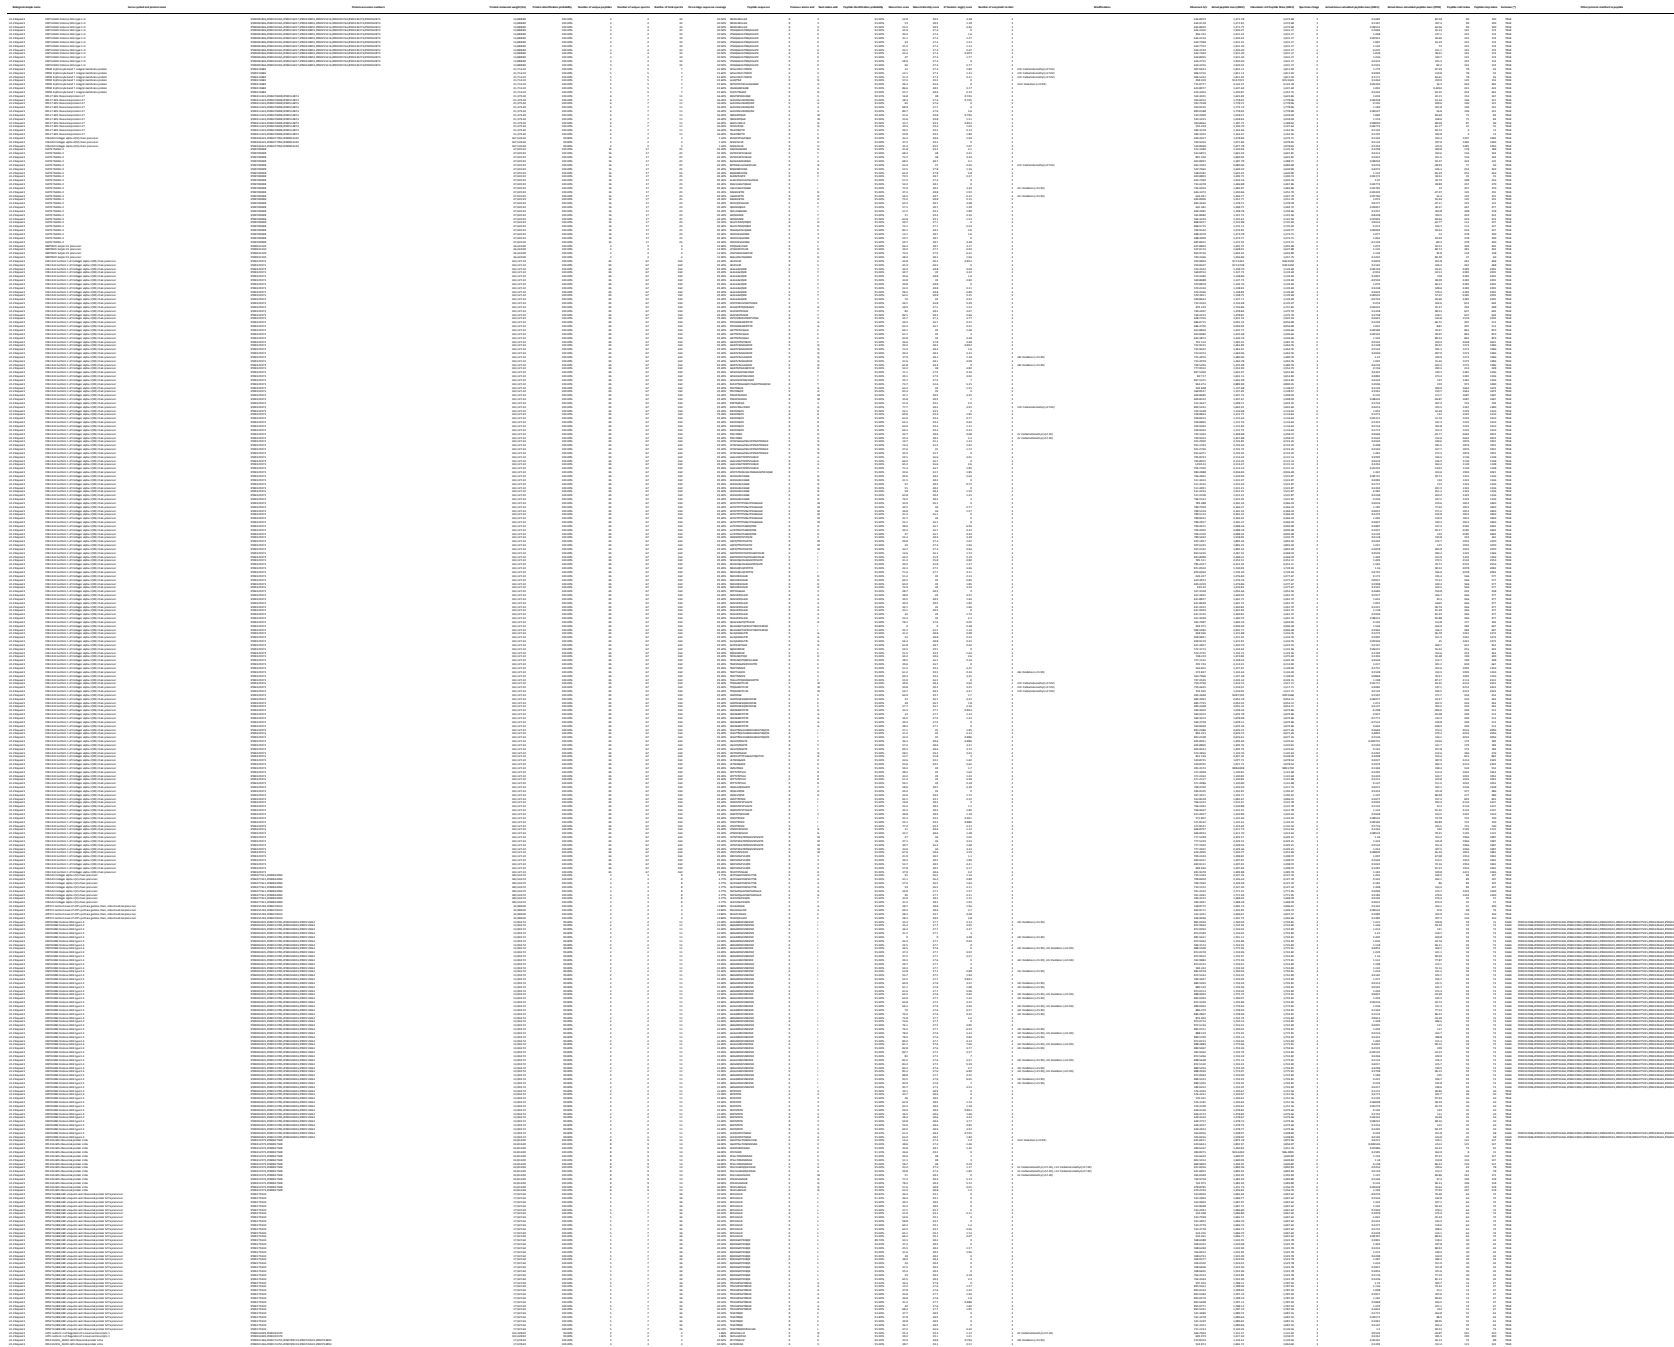

| Code | Description | Quantity | Unit | Price | Total | Remarks |
|------|-------------|----------|------|-------|-------|---------|
| 001  | ...         | ...      | ...  | ...   | ...   | ...     |
| 002  | ...         | ...      | ...  | ...   | ...   | ...     |
| 003  | ...         | ...      | ...  | ...   | ...   | ...     |
| 004  | ...         | ...      | ...  | ...   | ...   | ...     |
| 005  | ...         | ...      | ...  | ...   | ...   | ...     |
| 006  | ...         | ...      | ...  | ...   | ...   | ...     |
| 007  | ...         | ...      | ...  | ...   | ...   | ...     |
| 008  | ...         | ...      | ...  | ...   | ...   | ...     |
| 009  | ...         | ...      | ...  | ...   | ...   | ...     |
| 010  | ...         | ...      | ...  | ...   | ...   | ...     |
| 011  | ...         | ...      | ...  | ...   | ...   | ...     |
| 012  | ...         | ...      | ...  | ...   | ...   | ...     |
| 013  | ...         | ...      | ...  | ...   | ...   | ...     |
| 014  | ...         | ...      | ...  | ...   | ...   | ...     |
| 015  | ...         | ...      | ...  | ...   | ...   | ...     |
| 016  | ...         | ...      | ...  | ...   | ...   | ...     |
| 017  | ...         | ...      | ...  | ...   | ...   | ...     |
| 018  | ...         | ...      | ...  | ...   | ...   | ...     |
| 019  | ...         | ...      | ...  | ...   | ...   | ...     |
| 020  | ...         | ...      | ...  | ...   | ...   | ...     |
| 021  | ...         | ...      | ...  | ...   | ...   | ...     |
| 022  | ...         | ...      | ...  | ...   | ...   | ...     |
| 023  | ...         | ...      | ...  | ...   | ...   | ...     |
| 024  | ...         | ...      | ...  | ...   | ...   | ...     |
| 025  | ...         | ...      | ...  | ...   | ...   | ...     |
| 026  | ...         | ...      | ...  | ...   | ...   | ...     |
| 027  | ...         | ...      | ...  | ...   | ...   | ...     |
| 028  | ...         | ...      | ...  | ...   | ...   | ...     |
| 029  | ...         | ...      | ...  | ...   | ...   | ...     |
| 030  | ...         | ...      | ...  | ...   | ...   | ...     |
| 031  | ...         | ...      | ...  | ...   | ...   | ...     |
| 032  | ...         | ...      | ...  | ...   | ...   | ...     |
| 033  | ...         | ...      | ...  | ...   | ...   | ...     |
| 034  | ...         | ...      | ...  | ...   | ...   | ...     |
| 035  | ...         | ...      | ...  | ...   | ...   | ...     |
| 036  | ...         | ...      | ...  | ...   | ...   | ...     |
| 037  | ...         | ...      | ...  | ...   | ...   | ...     |
| 038  | ...         | ...      | ...  | ...   | ...   | ...     |
| 039  | ...         | ...      | ...  | ...   | ...   | ...     |
| 040  | ...         | ...      | ...  | ...   | ...   | ...     |
| 041  | ...         | ...      | ...  | ...   | ...   | ...     |
| 042  | ...         | ...      | ...  | ...   | ...   | ...     |
| 043  | ...         | ...      | ...  | ...   | ...   | ...     |
| 044  | ...         | ...      | ...  | ...   | ...   | ...     |
| 045  | ...         | ...      | ...  | ...   | ...   | ...     |
| 046  | ...         | ...      | ...  | ...   | ...   | ...     |
| 047  | ...         | ...      | ...  | ...   | ...   | ...     |
| 048  | ...         | ...      | ...  | ...   | ...   | ...     |
| 049  | ...         | ...      | ...  | ...   | ...   | ...     |
| 050  | ...         | ...      | ...  | ...   | ...   | ...     |
| 051  | ...         | ...      | ...  | ...   | ...   | ...     |
| 052  | ...         | ...      | ...  | ...   | ...   | ...     |
| 053  | ...         | ...      | ...  | ...   | ...   | ...     |
| 054  | ...         | ...      | ...  | ...   | ...   | ...     |
| 055  | ...         | ...      | ...  | ...   | ...   | ...     |
| 056  | ...         | ...      | ...  | ...   | ...   | ...     |
| 057  | ...         | ...      | ...  | ...   | ...   | ...     |
| 058  | ...         | ...      | ...  | ...   | ...   | ...     |
| 059  | ...         | ...      | ...  | ...   | ...   | ...     |
| 060  | ...         | ...      | ...  | ...   | ...   | ...     |
| 061  | ...         | ...      | ...  | ...   | ...   | ...     |
| 062  | ...         | ...      | ...  | ...   | ...   | ...     |
| 063  | ...         | ...      | ...  | ...   | ...   | ...     |
| 064  | ...         | ...      | ...  | ...   | ...   | ...     |
| 065  | ...         | ...      | ...  | ...   | ...   | ...     |
| 066  | ...         | ...      | ...  | ...   | ...   | ...     |
| 067  | ...         | ...      | ...  | ...   | ...   | ...     |
| 068  | ...         | ...      | ...  | ...   | ...   | ...     |
| 069  | ...         | ...      | ...  | ...   | ...   | ...     |
| 070  | ...         | ...      | ...  | ...   | ...   | ...     |
| 071  | ...         | ...      | ...  | ...   | ...   | ...     |
| 072  | ...         | ...      | ...  | ...   | ...   | ...     |
| 073  | ...         | ...      | ...  | ...   | ...   | ...     |
| 074  | ...         | ...      | ...  | ...   | ...   | ...     |
| 075  | ...         | ...      | ...  | ...   | ...   | ...     |
| 076  | ...         | ...      | ...  | ...   | ...   | ...     |
| 077  | ...         | ...      | ...  | ...   | ...   | ...     |
| 078  | ...         | ...      | ...  | ...   | ...   | ...     |
| 079  | ...         | ...      | ...  | ...   | ...   | ...     |
| 080  | ...         | ...      | ...  | ...   | ...   | ...     |
| 081  | ...         | ...      | ...  | ...   | ...   | ...     |
| 082  | ...         | ...      | ...  | ...   | ...   | ...     |
| 083  | ...         | ...      | ...  | ...   | ...   | ...     |
| 084  | ...         | ...      | ...  | ...   | ...   | ...     |
| 085  | ...         | ...      | ...  | ...   | ...   | ...     |
| 086  | ...         | ...      | ...  | ...   | ...   | ...     |
| 087  | ...         | ...      | ...  | ...   | ...   | ...     |
| 088  | ...         | ...      | ...  | ...   | ...   | ...     |
| 089  | ...         | ...      | ...  | ...   | ...   | ...     |
| 090  | ...         | ...      | ...  | ...   | ...   | ...     |
| 091  | ...         | ...      | ...  | ...   | ...   | ...     |
| 092  | ...         | ...      | ...  | ...   | ...   | ...     |
| 093  | ...         | ...      | ...  | ...   | ...   | ...     |
| 094  | ...         | ...      | ...  | ...   | ...   | ...     |
| 095  | ...         | ...      | ...  | ...   | ...   | ...     |
| 096  | ...         | ...      | ...  | ...   | ...   | ...     |
| 097  | ...         | ...      | ...  | ...   | ...   | ...     |
| 098  | ...         | ...      | ...  | ...   | ...   | ...     |
| 099  | ...         | ...      | ...  | ...   | ...   | ...     |
| 100  | ...         | ...      | ...  | ...   | ...   | ...     |

| Item No. | Description | Quantity | Unit | Rate | Amount |
|----------|-------------|----------|------|------|--------|
| 1        | ...         | ...      | ...  | ...  | ...    |
| 2        | ...         | ...      | ...  | ...  | ...    |
| 3        | ...         | ...      | ...  | ...  | ...    |
| 4        | ...         | ...      | ...  | ...  | ...    |
| 5        | ...         | ...      | ...  | ...  | ...    |
| 6        | ...         | ...      | ...  | ...  | ...    |
| 7        | ...         | ...      | ...  | ...  | ...    |
| 8        | ...         | ...      | ...  | ...  | ...    |
| 9        | ...         | ...      | ...  | ...  | ...    |
| 10       | ...         | ...      | ...  | ...  | ...    |
| 11       | ...         | ...      | ...  | ...  | ...    |
| 12       | ...         | ...      | ...  | ...  | ...    |
| 13       | ...         | ...      | ...  | ...  | ...    |
| 14       | ...         | ...      | ...  | ...  | ...    |
| 15       | ...         | ...      | ...  | ...  | ...    |
| 16       | ...         | ...      | ...  | ...  | ...    |
| 17       | ...         | ...      | ...  | ...  | ...    |
| 18       | ...         | ...      | ...  | ...  | ...    |
| 19       | ...         | ...      | ...  | ...  | ...    |
| 20       | ...         | ...      | ...  | ...  | ...    |
| 21       | ...         | ...      | ...  | ...  | ...    |
| 22       | ...         | ...      | ...  | ...  | ...    |
| 23       | ...         | ...      | ...  | ...  | ...    |
| 24       | ...         | ...      | ...  | ...  | ...    |
| 25       | ...         | ...      | ...  | ...  | ...    |
| 26       | ...         | ...      | ...  | ...  | ...    |
| 27       | ...         | ...      | ...  | ...  | ...    |
| 28       | ...         | ...      | ...  | ...  | ...    |
| 29       | ...         | ...      | ...  | ...  | ...    |
| 30       | ...         | ...      | ...  | ...  | ...    |
| 31       | ...         | ...      | ...  | ...  | ...    |
| 32       | ...         | ...      | ...  | ...  | ...    |
| 33       | ...         | ...      | ...  | ...  | ...    |
| 34       | ...         | ...      | ...  | ...  | ...    |
| 35       | ...         | ...      | ...  | ...  | ...    |
| 36       | ...         | ...      | ...  | ...  | ...    |
| 37       | ...         | ...      | ...  | ...  | ...    |
| 38       | ...         | ...      | ...  | ...  | ...    |
| 39       | ...         | ...      | ...  | ...  | ...    |
| 40       | ...         | ...      | ...  | ...  | ...    |
| 41       | ...         | ...      | ...  | ...  | ...    |
| 42       | ...         | ...      | ...  | ...  | ...    |
| 43       | ...         | ...      | ...  | ...  | ...    |
| 44       | ...         | ...      | ...  | ...  | ...    |
| 45       | ...         | ...      | ...  | ...  | ...    |
| 46       | ...         | ...      | ...  | ...  | ...    |
| 47       | ...         | ...      | ...  | ...  | ...    |
| 48       | ...         | ...      | ...  | ...  | ...    |
| 49       | ...         | ...      | ...  | ...  | ...    |
| 50       | ...         | ...      | ...  | ...  | ...    |
| 51       | ...         | ...      | ...  | ...  | ...    |
| 52       | ...         | ...      | ...  | ...  | ...    |
| 53       | ...         | ...      | ...  | ...  | ...    |
| 54       | ...         | ...      | ...  | ...  | ...    |
| 55       | ...         | ...      | ...  | ...  | ...    |
| 56       | ...         | ...      | ...  | ...  | ...    |
| 57       | ...         | ...      | ...  | ...  | ...    |
| 58       | ...         | ...      | ...  | ...  | ...    |
| 59       | ...         | ...      | ...  | ...  | ...    |
| 60       | ...         | ...      | ...  | ...  | ...    |
| 61       | ...         | ...      | ...  | ...  | ...    |
| 62       | ...         | ...      | ...  | ...  | ...    |
| 63       | ...         | ...      | ...  | ...  | ...    |
| 64       | ...         | ...      | ...  | ...  | ...    |
| 65       | ...         | ...      | ...  | ...  | ...    |
| 66       | ...         | ...      | ...  | ...  | ...    |
| 67       | ...         | ...      | ...  | ...  | ...    |
| 68       | ...         | ...      | ...  | ...  | ...    |
| 69       | ...         | ...      | ...  | ...  | ...    |
| 70       | ...         | ...      | ...  | ...  | ...    |
| 71       | ...         | ...      | ...  | ...  | ...    |
| 72       | ...         | ...      | ...  | ...  | ...    |
| 73       | ...         | ...      | ...  | ...  | ...    |
| 74       | ...         | ...      | ...  | ...  | ...    |
| 75       | ...         | ...      | ...  | ...  | ...    |
| 76       | ...         | ...      | ...  | ...  | ...    |
| 77       | ...         | ...      | ...  | ...  | ...    |
| 78       | ...         | ...      | ...  | ...  | ...    |
| 79       | ...         | ...      | ...  | ...  | ...    |
| 80       | ...         | ...      | ...  | ...  | ...    |
| 81       | ...         | ...      | ...  | ...  | ...    |
| 82       | ...         | ...      | ...  | ...  | ...    |
| 83       | ...         | ...      | ...  | ...  | ...    |
| 84       | ...         | ...      | ...  | ...  | ...    |
| 85       | ...         | ...      | ...  | ...  | ...    |
| 86       | ...         | ...      | ...  | ...  | ...    |
| 87       | ...         | ...      | ...  | ...  | ...    |
| 88       | ...         | ...      | ...  | ...  | ...    |
| 89       | ...         | ...      | ...  | ...  | ...    |
| 90       | ...         | ...      | ...  | ...  | ...    |
| 91       | ...         | ...      | ...  | ...  | ...    |
| 92       | ...         | ...      | ...  | ...  | ...    |
| 93       | ...         | ...      | ...  | ...  | ...    |
| 94       | ...         | ...      | ...  | ...  | ...    |
| 95       | ...         | ...      | ...  | ...  | ...    |
| 96       | ...         | ...      | ...  | ...  | ...    |
| 97       | ...         | ...      | ...  | ...  | ...    |
| 98       | ...         | ...      | ...  | ...  | ...    |
| 99       | ...         | ...      | ...  | ...  | ...    |
| 100      | ...         | ...      | ...  | ...  | ...    |





|   |   |   |   |   |   |   |   |   |    |    |    |    |    |    |    |    |    |    |    |    |    |    |    |    |    |    |    |    |    |    |    |    |    |    |    |    |    |    |    |    |    |    |    |    |    |    |    |    |    |    |    |    |    |    |    |    |    |    |    |    |    |    |    |    |    |    |    |    |    |    |    |    |    |    |    |    |    |    |    |    |    |    |    |    |    |    |    |    |    |    |    |    |    |    |    |    |    |    |     |     |     |     |     |     |     |     |     |     |     |     |     |     |     |     |     |     |     |     |     |     |     |     |     |     |     |     |     |     |     |     |     |     |     |     |     |     |     |     |     |     |     |     |     |     |     |     |     |     |     |     |     |     |     |     |     |     |     |     |     |     |     |     |     |     |     |     |     |     |     |     |     |     |     |     |     |     |     |     |     |     |     |     |     |     |     |     |     |     |     |     |     |     |     |     |     |     |     |     |     |     |     |     |     |     |     |     |     |     |     |     |     |     |     |     |     |     |     |     |     |     |     |     |     |     |     |     |     |     |     |     |     |     |     |     |     |     |     |     |     |     |     |     |     |     |     |     |     |     |     |     |     |     |     |     |     |     |     |     |     |     |     |     |     |     |     |     |     |     |     |     |     |     |     |     |     |     |     |     |     |     |     |     |     |     |     |     |     |     |     |     |     |     |     |     |     |     |     |     |     |     |     |     |     |     |     |     |     |     |     |     |     |     |     |     |     |     |     |     |     |     |     |     |     |     |     |     |     |     |     |     |     |     |     |     |     |     |     |     |     |     |     |     |     |     |     |     |     |     |     |     |     |     |     |     |     |     |     |     |     |     |     |     |     |     |     |     |     |     |     |     |     |     |     |     |     |     |     |     |     |     |     |     |     |     |     |     |     |     |     |     |     |     |     |     |     |     |     |     |     |     |     |     |     |     |     |     |     |     |     |     |     |     |     |     |     |     |     |     |     |     |     |     |     |     |     |     |     |     |     |     |     |     |     |     |     |     |     |     |     |     |     |     |     |     |     |     |     |     |     |     |     |     |     |     |     |     |     |     |     |     |     |     |     |     |     |     |     |     |     |     |     |     |     |     |     |     |     |     |     |     |     |     |     |     |     |     |     |     |     |     |     |     |     |     |     |     |     |     |     |     |     |     |     |     |     |     |     |     |     |     |     |     |     |     |     |     |     |     |     |     |     |     |     |     |     |     |     |     |     |     |     |     |     |     |     |     |     |     |     |     |     |     |     |     |     |     |     |     |     |     |     |     |     |     |     |     |     |     |     |     |     |     |     |     |     |     |     |     |     |     |     |     |     |     |     |     |     |     |     |     |     |     |     |     |     |     |     |     |     |     |     |     |     |     |     |     |     |     |     |     |     |     |     |     |     |     |     |     |     |     |     |     |     |     |     |     |     |     |     |     |     |     |     |     |     |     |     |     |     |     |     |     |     |     |     |     |     |     |     |     |     |     |     |     |     |     |     |     |     |     |     |     |     |     |     |     |     |     |     |     |     |     |     |     |     |     |     |     |     |     |     |     |     |     |     |     |     |     |     |     |     |     |     |     |     |     |     |     |     |     |     |     |     |     |     |     |     |     |     |     |     |     |     |     |     |     |     |     |     |     |     |     |     |     |     |     |     |     |     |     |     |     |     |     |     |     |     |     |     |     |     |     |     |     |     |     |     |     |     |     |     |     |     |     |     |     |     |     |     |     |     |     |     |     |     |     |     |     |     |     |     |     |     |     |     |     |     |     |     |     |     |     |     |     |     |     |     |     |     |     |     |     |     |     |     |     |     |     |     |     |     |     |     |     |     |     |     |     |     |     |     |     |     |     |     |     |     |     |     |     |     |     |     |     |     |     |     |     |     |     |     |     |     |     |     |     |     |     |     |     |     |     |     |     |     |     |     |     |     |     |     |     |     |     |     |     |     |     |     |     |     |     |     |     |     |     |     |     |     |     |     |     |     |     |     |     |     |     |     |     |     |     |     |     |     |     |     |     |     |     |     |     |     |     |     |     |     |     |     |     |     |     |     |     |     |     |     |     |     |     |     |     |     |     |     |     |     |     |     |     |     |     |     |     |     |     |     |     |     |     |     |     |     |     |     |     |     |     |     |     |     |     |     |     |     |     |     |     |     |     |     |     |     |     |     |     |     |     |     |     |     |     |     |     |     |     |     |     |     |     |     |     |     |     |     |     |     |     |     |     |     |     |     |     |     |     |     |     |     |     |     |     |     |     |     |     |     |     |     |     |     |     |     |     |     |     |     |     |      |
|---|---|---|---|---|---|---|---|---|----|----|----|----|----|----|----|----|----|----|----|----|----|----|----|----|----|----|----|----|----|----|----|----|----|----|----|----|----|----|----|----|----|----|----|----|----|----|----|----|----|----|----|----|----|----|----|----|----|----|----|----|----|----|----|----|----|----|----|----|----|----|----|----|----|----|----|----|----|----|----|----|----|----|----|----|----|----|----|----|----|----|----|----|----|----|----|----|----|----|-----|-----|-----|-----|-----|-----|-----|-----|-----|-----|-----|-----|-----|-----|-----|-----|-----|-----|-----|-----|-----|-----|-----|-----|-----|-----|-----|-----|-----|-----|-----|-----|-----|-----|-----|-----|-----|-----|-----|-----|-----|-----|-----|-----|-----|-----|-----|-----|-----|-----|-----|-----|-----|-----|-----|-----|-----|-----|-----|-----|-----|-----|-----|-----|-----|-----|-----|-----|-----|-----|-----|-----|-----|-----|-----|-----|-----|-----|-----|-----|-----|-----|-----|-----|-----|-----|-----|-----|-----|-----|-----|-----|-----|-----|-----|-----|-----|-----|-----|-----|-----|-----|-----|-----|-----|-----|-----|-----|-----|-----|-----|-----|-----|-----|-----|-----|-----|-----|-----|-----|-----|-----|-----|-----|-----|-----|-----|-----|-----|-----|-----|-----|-----|-----|-----|-----|-----|-----|-----|-----|-----|-----|-----|-----|-----|-----|-----|-----|-----|-----|-----|-----|-----|-----|-----|-----|-----|-----|-----|-----|-----|-----|-----|-----|-----|-----|-----|-----|-----|-----|-----|-----|-----|-----|-----|-----|-----|-----|-----|-----|-----|-----|-----|-----|-----|-----|-----|-----|-----|-----|-----|-----|-----|-----|-----|-----|-----|-----|-----|-----|-----|-----|-----|-----|-----|-----|-----|-----|-----|-----|-----|-----|-----|-----|-----|-----|-----|-----|-----|-----|-----|-----|-----|-----|-----|-----|-----|-----|-----|-----|-----|-----|-----|-----|-----|-----|-----|-----|-----|-----|-----|-----|-----|-----|-----|-----|-----|-----|-----|-----|-----|-----|-----|-----|-----|-----|-----|-----|-----|-----|-----|-----|-----|-----|-----|-----|-----|-----|-----|-----|-----|-----|-----|-----|-----|-----|-----|-----|-----|-----|-----|-----|-----|-----|-----|-----|-----|-----|-----|-----|-----|-----|-----|-----|-----|-----|-----|-----|-----|-----|-----|-----|-----|-----|-----|-----|-----|-----|-----|-----|-----|-----|-----|-----|-----|-----|-----|-----|-----|-----|-----|-----|-----|-----|-----|-----|-----|-----|-----|-----|-----|-----|-----|-----|-----|-----|-----|-----|-----|-----|-----|-----|-----|-----|-----|-----|-----|-----|-----|-----|-----|-----|-----|-----|-----|-----|-----|-----|-----|-----|-----|-----|-----|-----|-----|-----|-----|-----|-----|-----|-----|-----|-----|-----|-----|-----|-----|-----|-----|-----|-----|-----|-----|-----|-----|-----|-----|-----|-----|-----|-----|-----|-----|-----|-----|-----|-----|-----|-----|-----|-----|-----|-----|-----|-----|-----|-----|-----|-----|-----|-----|-----|-----|-----|-----|-----|-----|-----|-----|-----|-----|-----|-----|-----|-----|-----|-----|-----|-----|-----|-----|-----|-----|-----|-----|-----|-----|-----|-----|-----|-----|-----|-----|-----|-----|-----|-----|-----|-----|-----|-----|-----|-----|-----|-----|-----|-----|-----|-----|-----|-----|-----|-----|-----|-----|-----|-----|-----|-----|-----|-----|-----|-----|-----|-----|-----|-----|-----|-----|-----|-----|-----|-----|-----|-----|-----|-----|-----|-----|-----|-----|-----|-----|-----|-----|-----|-----|-----|-----|-----|-----|-----|-----|-----|-----|-----|-----|-----|-----|-----|-----|-----|-----|-----|-----|-----|-----|-----|-----|-----|-----|-----|-----|-----|-----|-----|-----|-----|-----|-----|-----|-----|-----|-----|-----|-----|-----|-----|-----|-----|-----|-----|-----|-----|-----|-----|-----|-----|-----|-----|-----|-----|-----|-----|-----|-----|-----|-----|-----|-----|-----|-----|-----|-----|-----|-----|-----|-----|-----|-----|-----|-----|-----|-----|-----|-----|-----|-----|-----|-----|-----|-----|-----|-----|-----|-----|-----|-----|-----|-----|-----|-----|-----|-----|-----|-----|-----|-----|-----|-----|-----|-----|-----|-----|-----|-----|-----|-----|-----|-----|-----|-----|-----|-----|-----|-----|-----|-----|-----|-----|-----|-----|-----|-----|-----|-----|-----|-----|-----|-----|-----|-----|-----|-----|-----|-----|-----|-----|-----|-----|-----|-----|-----|-----|-----|-----|-----|-----|-----|-----|-----|-----|-----|-----|-----|-----|-----|-----|-----|-----|-----|-----|-----|-----|-----|-----|-----|-----|-----|-----|-----|-----|-----|-----|-----|-----|-----|-----|-----|-----|-----|-----|-----|-----|-----|-----|-----|-----|-----|-----|-----|-----|-----|-----|-----|-----|-----|-----|-----|-----|-----|-----|-----|-----|-----|-----|-----|-----|-----|-----|-----|-----|-----|-----|-----|-----|-----|-----|-----|-----|-----|-----|-----|-----|-----|-----|-----|-----|-----|-----|-----|-----|-----|-----|-----|-----|-----|-----|-----|-----|-----|-----|-----|-----|-----|-----|-----|-----|-----|-----|-----|-----|-----|-----|-----|-----|-----|-----|-----|-----|-----|-----|-----|-----|-----|-----|-----|-----|-----|-----|-----|-----|-----|-----|-----|-----|-----|-----|-----|-----|-----|-----|-----|-----|-----|-----|-----|-----|-----|-----|-----|-----|-----|-----|-----|-----|-----|-----|-----|-----|-----|-----|-----|-----|-----|-----|-----|-----|-----|-----|-----|-----|-----|-----|-----|-----|-----|-----|-----|-----|-----|-----|-----|-----|-----|-----|-----|-----|-----|-----|-----|-----|-----|-----|-----|-----|-----|-----|-----|-----|-----|-----|-----|-----|-----|-----|-----|-----|-----|-----|-----|-----|-----|-----|-----|-----|-----|-----|-----|-----|-----|-----|-----|-----|-----|-----|-----|-----|-----|-----|-----|-----|-----|-----|-----|-----|-----|-----|-----|-----|-----|-----|-----|-----|-----|-----|-----|-----|-----|-----|-----|-----|-----|-----|-----|-----|-----|-----|-----|-----|------|
| 1 | 2 | 3 | 4 | 5 | 6 | 7 | 8 | 9 | 10 | 11 | 12 | 13 | 14 | 15 | 16 | 17 | 18 | 19 | 20 | 21 | 22 | 23 | 24 | 25 | 26 | 27 | 28 | 29 | 30 | 31 | 32 | 33 | 34 | 35 | 36 | 37 | 38 | 39 | 40 | 41 | 42 | 43 | 44 | 45 | 46 | 47 | 48 | 49 | 50 | 51 | 52 | 53 | 54 | 55 | 56 | 57 | 58 | 59 | 60 | 61 | 62 | 63 | 64 | 65 | 66 | 67 | 68 | 69 | 70 | 71 | 72 | 73 | 74 | 75 | 76 | 77 | 78 | 79 | 80 | 81 | 82 | 83 | 84 | 85 | 86 | 87 | 88 | 89 | 90 | 91 | 92 | 93 | 94 | 95 | 96 | 97 | 98 | 99 | 100 | 101 | 102 | 103 | 104 | 105 | 106 | 107 | 108 | 109 | 110 | 111 | 112 | 113 | 114 | 115 | 116 | 117 | 118 | 119 | 120 | 121 | 122 | 123 | 124 | 125 | 126 | 127 | 128 | 129 | 130 | 131 | 132 | 133 | 134 | 135 | 136 | 137 | 138 | 139 | 140 | 141 | 142 | 143 | 144 | 145 | 146 | 147 | 148 | 149 | 150 | 151 | 152 | 153 | 154 | 155 | 156 | 157 | 158 | 159 | 160 | 161 | 162 | 163 | 164 | 165 | 166 | 167 | 168 | 169 | 170 | 171 | 172 | 173 | 174 | 175 | 176 | 177 | 178 | 179 | 180 | 181 | 182 | 183 | 184 | 185 | 186 | 187 | 188 | 189 | 190 | 191 | 192 | 193 | 194 | 195 | 196 | 197 | 198 | 199 | 200 | 201 | 202 | 203 | 204 | 205 | 206 | 207 | 208 | 209 | 210 | 211 | 212 | 213 | 214 | 215 | 216 | 217 | 218 | 219 | 220 | 221 | 222 | 223 | 224 | 225 | 226 | 227 | 228 | 229 | 230 | 231 | 232 | 233 | 234 | 235 | 236 | 237 | 238 | 239 | 240 | 241 | 242 | 243 | 244 | 245 | 246 | 247 | 248 | 249 | 250 | 251 | 252 | 253 | 254 | 255 | 256 | 257 | 258 | 259 | 260 | 261 | 262 | 263 | 264 | 265 | 266 | 267 | 268 | 269 | 270 | 271 | 272 | 273 | 274 | 275 | 276 | 277 | 278 | 279 | 280 | 281 | 282 | 283 | 284 | 285 | 286 | 287 | 288 | 289 | 290 | 291 | 292 | 293 | 294 | 295 | 296 | 297 | 298 | 299 | 300 | 301 | 302 | 303 | 304 | 305 | 306 | 307 | 308 | 309 | 310 | 311 | 312 | 313 | 314 | 315 | 316 | 317 | 318 | 319 | 320 | 321 | 322 | 323 | 324 | 325 | 326 | 327 | 328 | 329 | 330 | 331 | 332 | 333 | 334 | 335 | 336 | 337 | 338 | 339 | 340 | 341 | 342 | 343 | 344 | 345 | 346 | 347 | 348 | 349 | 350 | 351 | 352 | 353 | 354 | 355 | 356 | 357 | 358 | 359 | 360 | 361 | 362 | 363 | 364 | 365 | 366 | 367 | 368 | 369 | 370 | 371 | 372 | 373 | 374 | 375 | 376 | 377 | 378 | 379 | 380 | 381 | 382 | 383 | 384 | 385 | 386 | 387 | 388 | 389 | 390 | 391 | 392 | 393 | 394 | 395 | 396 | 397 | 398 | 399 | 400 | 401 | 402 | 403 | 404 | 405 | 406 | 407 | 408 | 409 | 410 | 411 | 412 | 413 | 414 | 415 | 416 | 417 | 418 | 419 | 420 | 421 | 422 | 423 | 424 | 425 | 426 | 427 | 428 | 429 | 430 | 431 | 432 | 433 | 434 | 435 | 436 | 437 | 438 | 439 | 440 | 441 | 442 | 443 | 444 | 445 | 446 | 447 | 448 | 449 | 450 | 451 | 452 | 453 | 454 | 455 | 456 | 457 | 458 | 459 | 460 | 461 | 462 | 463 | 464 | 465 | 466 | 467 | 468 | 469 | 470 | 471 | 472 | 473 | 474 | 475 | 476 | 477 | 478 | 479 | 480 | 481 | 482 | 483 | 484 | 485 | 486 | 487 | 488 | 489 | 490 | 491 | 492 | 493 | 494 | 495 | 496 | 497 | 498 | 499 | 500 | 501 | 502 | 503 | 504 | 505 | 506 | 507 | 508 | 509 | 510 | 511 | 512 | 513 | 514 | 515 | 516 | 517 | 518 | 519 | 520 | 521 | 522 | 523 | 524 | 525 | 526 | 527 | 528 | 529 | 530 | 531 | 532 | 533 | 534 | 535 | 536 | 537 | 538 | 539 | 540 | 541 | 542 | 543 | 544 | 545 | 546 | 547 | 548 | 549 | 550 | 551 | 552 | 553 | 554 | 555 | 556 | 557 | 558 | 559 | 560 | 561 | 562 | 563 | 564 | 565 | 566 | 567 | 568 | 569 | 570 | 571 | 572 | 573 | 574 | 575 | 576 | 577 | 578 | 579 | 580 | 581 | 582 | 583 | 584 | 585 | 586 | 587 | 588 | 589 | 590 | 591 | 592 | 593 | 594 | 595 | 596 | 597 | 598 | 599 | 600 | 601 | 602 | 603 | 604 | 605 | 606 | 607 | 608 | 609 | 610 | 611 | 612 | 613 | 614 | 615 | 616 | 617 | 618 | 619 | 620 | 621 | 622 | 623 | 624 | 625 | 626 | 627 | 628 | 629 | 630 | 631 | 632 | 633 | 634 | 635 | 636 | 637 | 638 | 639 | 640 | 641 | 642 | 643 | 644 | 645 | 646 | 647 | 648 | 649 | 650 | 651 | 652 | 653 | 654 | 655 | 656 | 657 | 658 | 659 | 660 | 661 | 662 | 663 | 664 | 665 | 666 | 667 | 668 | 669 | 670 | 671 | 672 | 673 | 674 | 675 | 676 | 677 | 678 | 679 | 680 | 681 | 682 | 683 | 684 | 685 | 686 | 687 | 688 | 689 | 690 | 691 | 692 | 693 | 694 | 695 | 696 | 697 | 698 | 699 | 700 | 701 | 702 | 703 | 704 | 705 | 706 | 707 | 708 | 709 | 710 | 711 | 712 | 713 | 714 | 715 | 716 | 717 | 718 | 719 | 720 | 721 | 722 | 723 | 724 | 725 | 726 | 727 | 728 | 729 | 730 | 731 | 732 | 733 | 734 | 735 | 736 | 737 | 738 | 739 | 740 | 741 | 742 | 743 | 744 | 745 | 746 | 747 | 748 | 749 | 750 | 751 | 752 | 753 | 754 | 755 | 756 | 757 | 758 | 759 | 760 | 761 | 762 | 763 | 764 | 765 | 766 | 767 | 768 | 769 | 770 | 771 | 772 | 773 | 774 | 775 | 776 | 777 | 778 | 779 | 780 | 781 | 782 | 783 | 784 | 785 | 786 | 787 | 788 | 789 | 790 | 791 | 792 | 793 | 794 | 795 | 796 | 797 | 798 | 799 | 800 | 801 | 802 | 803 | 804 | 805 | 806 | 807 | 808 | 809 | 810 | 811 | 812 | 813 | 814 | 815 | 816 | 817 | 818 | 819 | 820 | 821 | 822 | 823 | 824 | 825 | 826 | 827 | 828 | 829 | 830 | 831 | 832 | 833 | 834 | 835 | 836 | 837 | 838 | 839 | 840 | 841 | 842 | 843 | 844 | 845 | 846 | 847 | 848 | 849 | 850 | 851 | 852 | 853 | 854 | 855 | 856 | 857 | 858 | 859 | 860 | 861 | 862 | 863 | 864 | 865 | 866 | 867 | 868 | 869 | 870 | 871 | 872 | 873 | 874 | 875 | 876 | 877 | 878 | 879 | 880 | 881 | 882 | 883 | 884 | 885 | 886 | 887 | 888 | 889 | 890 | 891 | 892 | 893 | 894 | 895 | 896 | 897 | 898 | 899 | 900 | 901 | 902 | 903 | 904 | 905 | 906 | 907 | 908 | 909 | 910 | 911 | 912 | 913 | 914 | 915 | 916 | 917 | 918 | 919 | 920 | 921 | 922 | 923 | 924 | 925 | 926 | 927 | 928 | 929 | 930 | 931 | 932 | 933 | 934 | 935 | 936 | 937 | 938 | 939 | 940 | 941 | 942 | 943 | 944 | 945 | 946 | 947 | 948 | 949 | 950 | 951 | 952 | 953 | 954 | 955 | 956 | 957 | 958 | 959 | 960 | 961 | 962 | 963 | 964 | 965 | 966 | 967 | 968 | 969 | 970 | 971 | 972 | 973 | 974 | 975 | 976 | 977 | 978 | 979 | 980 | 981 | 982 | 983 | 984 | 985 | 986 | 987 | 988 | 989 | 990 | 991 | 992 | 993 | 994 | 995 | 996 | 997 | 998 | 999 | 1000 |
|---|---|---|---|---|---|---|---|---|----|----|----|----|----|----|----|----|----|----|----|----|----|----|----|----|----|----|----|----|----|----|----|----|----|----|----|----|----|----|----|----|----|----|----|----|----|----|----|----|----|----|----|----|----|----|----|----|----|----|----|----|----|----|----|----|----|----|----|----|----|----|----|----|----|----|----|----|----|----|----|----|----|----|----|----|----|----|----|----|----|----|----|----|----|----|----|----|----|----|-----|-----|-----|-----|-----|-----|-----|-----|-----|-----|-----|-----|-----|-----|-----|-----|-----|-----|-----|-----|-----|-----|-----|-----|-----|-----|-----|-----|-----|-----|-----|-----|-----|-----|-----|-----|-----|-----|-----|-----|-----|-----|-----|-----|-----|-----|-----|-----|-----|-----|-----|-----|-----|-----|-----|-----|-----|-----|-----|-----|-----|-----|-----|-----|-----|-----|-----|-----|-----|-----|-----|-----|-----|-----|-----|-----|-----|-----|-----|-----|-----|-----|-----|-----|-----|-----|-----|-----|-----|-----|-----|-----|-----|-----|-----|-----|-----|-----|-----|-----|-----|-----|-----|-----|-----|-----|-----|-----|-----|-----|-----|-----|-----|-----|-----|-----|-----|-----|-----|-----|-----|-----|-----|-----|-----|-----|-----|-----|-----|-----|-----|-----|-----|-----|-----|-----|-----|-----|-----|-----|-----|-----|-----|-----|-----|-----|-----|-----|-----|-----|-----|-----|-----|-----|-----|-----|-----|-----|-----|-----|-----|-----|-----|-----|-----|-----|-----|-----|-----|-----|-----|-----|-----|-----|-----|-----|-----|-----|-----|-----|-----|-----|-----|-----|-----|-----|-----|-----|-----|-----|-----|-----|-----|-----|-----|-----|-----|-----|-----|-----|-----|-----|-----|-----|-----|-----|-----|-----|-----|-----|-----|-----|-----|-----|-----|-----|-----|-----|-----|-----|-----|-----|-----|-----|-----|-----|-----|-----|-----|-----|-----|-----|-----|-----|-----|-----|-----|-----|-----|-----|-----|-----|-----|-----|-----|-----|-----|-----|-----|-----|-----|-----|-----|-----|-----|-----|-----|-----|-----|-----|-----|-----|-----|-----|-----|-----|-----|-----|-----|-----|-----|-----|-----|-----|-----|-----|-----|-----|-----|-----|-----|-----|-----|-----|-----|-----|-----|-----|-----|-----|-----|-----|-----|-----|-----|-----|-----|-----|-----|-----|-----|-----|-----|-----|-----|-----|-----|-----|-----|-----|-----|-----|-----|-----|-----|-----|-----|-----|-----|-----|-----|-----|-----|-----|-----|-----|-----|-----|-----|-----|-----|-----|-----|-----|-----|-----|-----|-----|-----|-----|-----|-----|-----|-----|-----|-----|-----|-----|-----|-----|-----|-----|-----|-----|-----|-----|-----|-----|-----|-----|-----|-----|-----|-----|-----|-----|-----|-----|-----|-----|-----|-----|-----|-----|-----|-----|-----|-----|-----|-----|-----|-----|-----|-----|-----|-----|-----|-----|-----|-----|-----|-----|-----|-----|-----|-----|-----|-----|-----|-----|-----|-----|-----|-----|-----|-----|-----|-----|-----|-----|-----|-----|-----|-----|-----|-----|-----|-----|-----|-----|-----|-----|-----|-----|-----|-----|-----|-----|-----|-----|-----|-----|-----|-----|-----|-----|-----|-----|-----|-----|-----|-----|-----|-----|-----|-----|-----|-----|-----|-----|-----|-----|-----|-----|-----|-----|-----|-----|-----|-----|-----|-----|-----|-----|-----|-----|-----|-----|-----|-----|-----|-----|-----|-----|-----|-----|-----|-----|-----|-----|-----|-----|-----|-----|-----|-----|-----|-----|-----|-----|-----|-----|-----|-----|-----|-----|-----|-----|-----|-----|-----|-----|-----|-----|-----|-----|-----|-----|-----|-----|-----|-----|-----|-----|-----|-----|-----|-----|-----|-----|-----|-----|-----|-----|-----|-----|-----|-----|-----|-----|-----|-----|-----|-----|-----|-----|-----|-----|-----|-----|-----|-----|-----|-----|-----|-----|-----|-----|-----|-----|-----|-----|-----|-----|-----|-----|-----|-----|-----|-----|-----|-----|-----|-----|-----|-----|-----|-----|-----|-----|-----|-----|-----|-----|-----|-----|-----|-----|-----|-----|-----|-----|-----|-----|-----|-----|-----|-----|-----|-----|-----|-----|-----|-----|-----|-----|-----|-----|-----|-----|-----|-----|-----|-----|-----|-----|-----|-----|-----|-----|-----|-----|-----|-----|-----|-----|-----|-----|-----|-----|-----|-----|-----|-----|-----|-----|-----|-----|-----|-----|-----|-----|-----|-----|-----|-----|-----|-----|-----|-----|-----|-----|-----|-----|-----|-----|-----|-----|-----|-----|-----|-----|-----|-----|-----|-----|-----|-----|-----|-----|-----|-----|-----|-----|-----|-----|-----|-----|-----|-----|-----|-----|-----|-----|-----|-----|-----|-----|-----|-----|-----|-----|-----|-----|-----|-----|-----|-----|-----|-----|-----|-----|-----|-----|-----|-----|-----|-----|-----|-----|-----|-----|-----|-----|-----|-----|-----|-----|-----|-----|-----|-----|-----|-----|-----|-----|-----|-----|-----|-----|-----|-----|-----|-----|-----|-----|-----|-----|-----|-----|-----|-----|-----|-----|-----|-----|-----|-----|-----|-----|-----|-----|-----|-----|-----|-----|-----|-----|-----|-----|-----|-----|-----|-----|-----|-----|-----|-----|-----|-----|-----|-----|-----|-----|-----|-----|-----|-----|-----|-----|-----|-----|-----|-----|-----|-----|-----|-----|-----|-----|-----|-----|-----|-----|-----|-----|-----|-----|-----|-----|-----|-----|-----|-----|-----|-----|-----|-----|-----|-----|-----|-----|-----|-----|-----|-----|-----|-----|-----|-----|-----|-----|-----|-----|-----|-----|-----|-----|-----|-----|-----|-----|-----|-----|-----|-----|-----|-----|-----|-----|-----|-----|-----|-----|-----|-----|-----|-----|-----|-----|-----|-----|-----|-----|-----|-----|-----|-----|-----|-----|-----|-----|-----|-----|-----|-----|-----|-----|-----|-----|-----|-----|-----|-----|-----|-----|-----|-----|-----|-----|-----|-----|-----|-----|-----|-----|-----|-----|-----|-----|-----|-----|-----|-----|-----|-----|-----|-----|-----|-----|-----|-----|-----|-----|-----|-----|-----|-----|-----|-----|------|





| Item No. | Description | Quantity | Unit | Rate | Total |
|----------|-------------|----------|------|------|-------|
| 1        | ...         | ...      | ...  | ...  | ...   |
| 2        | ...         | ...      | ...  | ...  | ...   |
| 3        | ...         | ...      | ...  | ...  | ...   |
| 4        | ...         | ...      | ...  | ...  | ...   |
| 5        | ...         | ...      | ...  | ...  | ...   |
| 6        | ...         | ...      | ...  | ...  | ...   |
| 7        | ...         | ...      | ...  | ...  | ...   |
| 8        | ...         | ...      | ...  | ...  | ...   |
| 9        | ...         | ...      | ...  | ...  | ...   |
| 10       | ...         | ...      | ...  | ...  | ...   |
| 11       | ...         | ...      | ...  | ...  | ...   |
| 12       | ...         | ...      | ...  | ...  | ...   |
| 13       | ...         | ...      | ...  | ...  | ...   |
| 14       | ...         | ...      | ...  | ...  | ...   |
| 15       | ...         | ...      | ...  | ...  | ...   |
| 16       | ...         | ...      | ...  | ...  | ...   |
| 17       | ...         | ...      | ...  | ...  | ...   |
| 18       | ...         | ...      | ...  | ...  | ...   |
| 19       | ...         | ...      | ...  | ...  | ...   |
| 20       | ...         | ...      | ...  | ...  | ...   |
| 21       | ...         | ...      | ...  | ...  | ...   |
| 22       | ...         | ...      | ...  | ...  | ...   |
| 23       | ...         | ...      | ...  | ...  | ...   |
| 24       | ...         | ...      | ...  | ...  | ...   |
| 25       | ...         | ...      | ...  | ...  | ...   |
| 26       | ...         | ...      | ...  | ...  | ...   |
| 27       | ...         | ...      | ...  | ...  | ...   |
| 28       | ...         | ...      | ...  | ...  | ...   |
| 29       | ...         | ...      | ...  | ...  | ...   |
| 30       | ...         | ...      | ...  | ...  | ...   |
| 31       | ...         | ...      | ...  | ...  | ...   |
| 32       | ...         | ...      | ...  | ...  | ...   |
| 33       | ...         | ...      | ...  | ...  | ...   |
| 34       | ...         | ...      | ...  | ...  | ...   |
| 35       | ...         | ...      | ...  | ...  | ...   |
| 36       | ...         | ...      | ...  | ...  | ...   |
| 37       | ...         | ...      | ...  | ...  | ...   |
| 38       | ...         | ...      | ...  | ...  | ...   |
| 39       | ...         | ...      | ...  | ...  | ...   |
| 40       | ...         | ...      | ...  | ...  | ...   |
| 41       | ...         | ...      | ...  | ...  | ...   |
| 42       | ...         | ...      | ...  | ...  | ...   |
| 43       | ...         | ...      | ...  | ...  | ...   |
| 44       | ...         | ...      | ...  | ...  | ...   |
| 45       | ...         | ...      | ...  | ...  | ...   |
| 46       | ...         | ...      | ...  | ...  | ...   |
| 47       | ...         | ...      | ...  | ...  | ...   |
| 48       | ...         | ...      | ...  | ...  | ...   |
| 49       | ...         | ...      | ...  | ...  | ...   |
| 50       | ...         | ...      | ...  | ...  | ...   |
| 51       | ...         | ...      | ...  | ...  | ...   |
| 52       | ...         | ...      | ...  | ...  | ...   |
| 53       | ...         | ...      | ...  | ...  | ...   |
| 54       | ...         | ...      | ...  | ...  | ...   |
| 55       | ...         | ...      | ...  | ...  | ...   |
| 56       | ...         | ...      | ...  | ...  | ...   |
| 57       | ...         | ...      | ...  | ...  | ...   |
| 58       | ...         | ...      | ...  | ...  | ...   |
| 59       | ...         | ...      | ...  | ...  | ...   |
| 60       | ...         | ...      | ...  | ...  | ...   |
| 61       | ...         | ...      | ...  | ...  | ...   |
| 62       | ...         | ...      | ...  | ...  | ...   |
| 63       | ...         | ...      | ...  | ...  | ...   |
| 64       | ...         | ...      | ...  | ...  | ...   |
| 65       | ...         | ...      | ...  | ...  | ...   |
| 66       | ...         | ...      | ...  | ...  | ...   |
| 67       | ...         | ...      | ...  | ...  | ...   |
| 68       | ...         | ...      | ...  | ...  | ...   |
| 69       | ...         | ...      | ...  | ...  | ...   |
| 70       | ...         | ...      | ...  | ...  | ...   |
| 71       | ...         | ...      | ...  | ...  | ...   |
| 72       | ...         | ...      | ...  | ...  | ...   |
| 73       | ...         | ...      | ...  | ...  | ...   |
| 74       | ...         | ...      | ...  | ...  | ...   |
| 75       | ...         | ...      | ...  | ...  | ...   |
| 76       | ...         | ...      | ...  | ...  | ...   |
| 77       | ...         | ...      | ...  | ...  | ...   |
| 78       | ...         | ...      | ...  | ...  | ...   |
| 79       | ...         | ...      | ...  | ...  | ...   |
| 80       | ...         | ...      | ...  | ...  | ...   |
| 81       | ...         | ...      | ...  | ...  | ...   |
| 82       | ...         | ...      | ...  | ...  | ...   |
| 83       | ...         | ...      | ...  | ...  | ...   |
| 84       | ...         | ...      | ...  | ...  | ...   |
| 85       | ...         | ...      | ...  | ...  | ...   |
| 86       | ...         | ...      | ...  | ...  | ...   |
| 87       | ...         | ...      | ...  | ...  | ...   |
| 88       | ...         | ...      | ...  | ...  | ...   |
| 89       | ...         | ...      | ...  | ...  | ...   |
| 90       | ...         | ...      | ...  | ...  | ...   |
| 91       | ...         | ...      | ...  | ...  | ...   |
| 92       | ...         | ...      | ...  | ...  | ...   |
| 93       | ...         | ...      | ...  | ...  | ...   |
| 94       | ...         | ...      | ...  | ...  | ...   |
| 95       | ...         | ...      | ...  | ...  | ...   |
| 96       | ...         | ...      | ...  | ...  | ...   |
| 97       | ...         | ...      | ...  | ...  | ...   |
| 98       | ...         | ...      | ...  | ...  | ...   |
| 99       | ...         | ...      | ...  | ...  | ...   |
| 100      | ...         | ...      | ...  | ...  | ...   |

| Item No. | Description | Quantity | Unit | Rate | Total |
|----------|-------------|----------|------|------|-------|
| 1        | ...         | ...      | ...  | ...  | ...   |
| 2        | ...         | ...      | ...  | ...  | ...   |
| 3        | ...         | ...      | ...  | ...  | ...   |
| 4        | ...         | ...      | ...  | ...  | ...   |
| 5        | ...         | ...      | ...  | ...  | ...   |
| 6        | ...         | ...      | ...  | ...  | ...   |
| 7        | ...         | ...      | ...  | ...  | ...   |
| 8        | ...         | ...      | ...  | ...  | ...   |
| 9        | ...         | ...      | ...  | ...  | ...   |
| 10       | ...         | ...      | ...  | ...  | ...   |
| 11       | ...         | ...      | ...  | ...  | ...   |
| 12       | ...         | ...      | ...  | ...  | ...   |
| 13       | ...         | ...      | ...  | ...  | ...   |
| 14       | ...         | ...      | ...  | ...  | ...   |
| 15       | ...         | ...      | ...  | ...  | ...   |
| 16       | ...         | ...      | ...  | ...  | ...   |
| 17       | ...         | ...      | ...  | ...  | ...   |
| 18       | ...         | ...      | ...  | ...  | ...   |
| 19       | ...         | ...      | ...  | ...  | ...   |
| 20       | ...         | ...      | ...  | ...  | ...   |
| 21       | ...         | ...      | ...  | ...  | ...   |
| 22       | ...         | ...      | ...  | ...  | ...   |
| 23       | ...         | ...      | ...  | ...  | ...   |
| 24       | ...         | ...      | ...  | ...  | ...   |
| 25       | ...         | ...      | ...  | ...  | ...   |
| 26       | ...         | ...      | ...  | ...  | ...   |
| 27       | ...         | ...      | ...  | ...  | ...   |
| 28       | ...         | ...      | ...  | ...  | ...   |
| 29       | ...         | ...      | ...  | ...  | ...   |
| 30       | ...         | ...      | ...  | ...  | ...   |
| 31       | ...         | ...      | ...  | ...  | ...   |
| 32       | ...         | ...      | ...  | ...  | ...   |
| 33       | ...         | ...      | ...  | ...  | ...   |
| 34       | ...         | ...      | ...  | ...  | ...   |
| 35       | ...         | ...      | ...  | ...  | ...   |
| 36       | ...         | ...      | ...  | ...  | ...   |
| 37       | ...         | ...      | ...  | ...  | ...   |
| 38       | ...         | ...      | ...  | ...  | ...   |
| 39       | ...         | ...      | ...  | ...  | ...   |
| 40       | ...         | ...      | ...  | ...  | ...   |
| 41       | ...         | ...      | ...  | ...  | ...   |
| 42       | ...         | ...      | ...  | ...  | ...   |
| 43       | ...         | ...      | ...  | ...  | ...   |
| 44       | ...         | ...      | ...  | ...  | ...   |
| 45       | ...         | ...      | ...  | ...  | ...   |
| 46       | ...         | ...      | ...  | ...  | ...   |
| 47       | ...         | ...      | ...  | ...  | ...   |
| 48       | ...         | ...      | ...  | ...  | ...   |
| 49       | ...         | ...      | ...  | ...  | ...   |
| 50       | ...         | ...      | ...  | ...  | ...   |
| 51       | ...         | ...      | ...  | ...  | ...   |
| 52       | ...         | ...      | ...  | ...  | ...   |
| 53       | ...         | ...      | ...  | ...  | ...   |
| 54       | ...         | ...      | ...  | ...  | ...   |
| 55       | ...         | ...      | ...  | ...  | ...   |
| 56       | ...         | ...      | ...  | ...  | ...   |
| 57       | ...         | ...      | ...  | ...  | ...   |
| 58       | ...         | ...      | ...  | ...  | ...   |
| 59       | ...         | ...      | ...  | ...  | ...   |
| 60       | ...         | ...      | ...  | ...  | ...   |
| 61       | ...         | ...      | ...  | ...  | ...   |
| 62       | ...         | ...      | ...  | ...  | ...   |
| 63       | ...         | ...      | ...  | ...  | ...   |
| 64       | ...         | ...      | ...  | ...  | ...   |
| 65       | ...         | ...      | ...  | ...  | ...   |
| 66       | ...         | ...      | ...  | ...  | ...   |
| 67       | ...         | ...      | ...  | ...  | ...   |
| 68       | ...         | ...      | ...  | ...  | ...   |
| 69       | ...         | ...      | ...  | ...  | ...   |
| 70       | ...         | ...      | ...  | ...  | ...   |
| 71       | ...         | ...      | ...  | ...  | ...   |
| 72       | ...         | ...      | ...  | ...  | ...   |
| 73       | ...         | ...      | ...  | ...  | ...   |
| 74       | ...         | ...      | ...  | ...  | ...   |
| 75       | ...         | ...      | ...  | ...  | ...   |
| 76       | ...         | ...      | ...  | ...  | ...   |
| 77       | ...         | ...      | ...  | ...  | ...   |
| 78       | ...         | ...      | ...  | ...  | ...   |
| 79       | ...         | ...      | ...  | ...  | ...   |
| 80       | ...         | ...      | ...  | ...  | ...   |
| 81       | ...         | ...      | ...  | ...  | ...   |
| 82       | ...         | ...      | ...  | ...  | ...   |
| 83       | ...         | ...      | ...  | ...  | ...   |
| 84       | ...         | ...      | ...  | ...  | ...   |
| 85       | ...         | ...      | ...  | ...  | ...   |
| 86       | ...         | ...      | ...  | ...  | ...   |
| 87       | ...         | ...      | ...  | ...  | ...   |
| 88       | ...         | ...      | ...  | ...  | ...   |
| 89       | ...         | ...      | ...  | ...  | ...   |
| 90       | ...         | ...      | ...  | ...  | ...   |
| 91       | ...         | ...      | ...  | ...  | ...   |
| 92       | ...         | ...      | ...  | ...  | ...   |
| 93       | ...         | ...      | ...  | ...  | ...   |
| 94       | ...         | ...      | ...  | ...  | ...   |
| 95       | ...         | ...      | ...  | ...  | ...   |
| 96       | ...         | ...      | ...  | ...  | ...   |
| 97       | ...         | ...      | ...  | ...  | ...   |
| 98       | ...         | ...      | ...  | ...  | ...   |
| 99       | ...         | ...      | ...  | ...  | ...   |
| 100      | ...         | ...      | ...  | ...  | ...   |





[The page contains a large amount of extremely small, illegible text, likely a scan of a document with a very small font size. The text is arranged in vertical columns and is too dense to be transcribed accurately.]





Table with 15 columns: No, Nama, Pekerjaan, Alamat, No. Telepon, Tanggal, Keterangan, and 8 empty columns. The table contains 15 rows of data, including names like 'Siti Nurhasanah', and 'Siti Nurhasanah'. The 'Keterangan' column contains various entries such as 'Kardus', and 'Kardus'. The table is partially obscured by a large, faint watermark in the background.

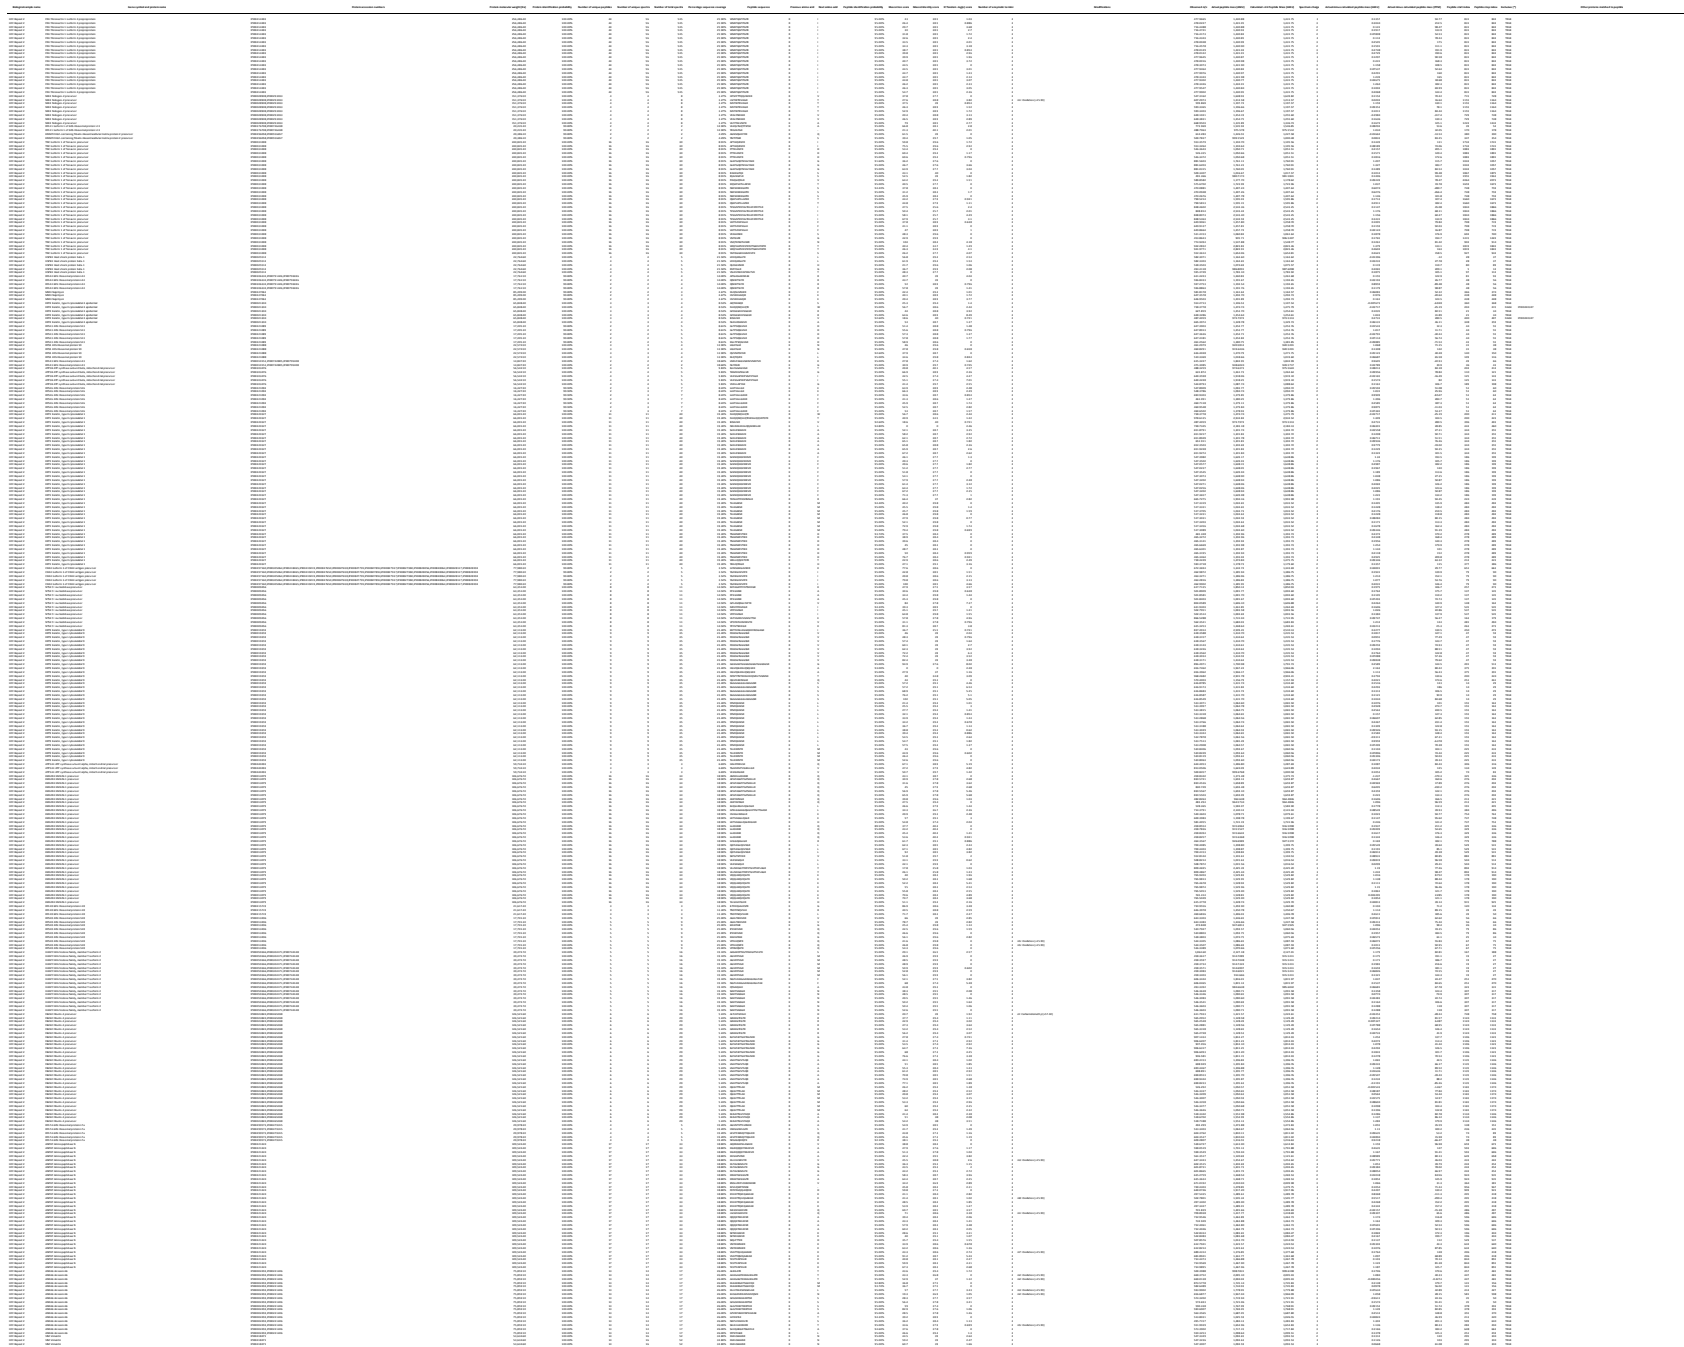

1  
 2  
 3  
 4  
 5  
 6  
 7  
 8  
 9  
 10  
 11  
 12  
 13  
 14  
 15  
 16  
 17  
 18  
 19  
 20  
 21  
 22  
 23  
 24  
 25  
 26  
 27  
 28  
 29  
 30  
 31  
 32  
 33  
 34  
 35  
 36  
 37  
 38  
 39  
 40  
 41  
 42  
 43  
 44  
 45  
 46  
 47  
 48  
 49  
 50  
 51  
 52  
 53  
 54  
 55  
 56  
 57  
 58  
 59  
 60  
 61  
 62  
 63  
 64  
 65  
 66  
 67  
 68  
 69  
 70  
 71  
 72  
 73  
 74  
 75  
 76  
 77  
 78  
 79  
 80  
 81  
 82  
 83  
 84  
 85  
 86  
 87  
 88  
 89  
 90  
 91  
 92  
 93  
 94  
 95  
 96  
 97  
 98  
 99  
 100  
 101  
 102  
 103  
 104  
 105  
 106  
 107  
 108  
 109  
 110  
 111  
 112  
 113  
 114  
 115  
 116  
 117  
 118  
 119  
 120  
 121  
 122  
 123  
 124  
 125  
 126  
 127  
 128  
 129  
 130  
 131  
 132  
 133  
 134  
 135  
 136  
 137  
 138  
 139  
 140  
 141  
 142  
 143  
 144  
 145  
 146  
 147  
 148  
 149  
 150  
 151  
 152  
 153  
 154  
 155  
 156  
 157  
 158  
 159  
 160  
 161  
 162  
 163  
 164  
 165  
 166  
 167  
 168  
 169  
 170  
 171  
 172  
 173  
 174  
 175  
 176  
 177  
 178  
 179  
 180  
 181  
 182  
 183  
 184  
 185  
 186  
 187  
 188  
 189  
 190  
 191  
 192  
 193  
 194  
 195  
 196  
 197  
 198  
 199  
 200  
 201  
 202  
 203  
 204  
 205  
 206  
 207  
 208  
 209  
 210  
 211  
 212  
 213  
 214  
 215  
 216  
 217  
 218  
 219  
 220  
 221  
 222  
 223  
 224  
 225  
 226  
 227  
 228  
 229  
 230  
 231  
 232  
 233  
 234  
 235  
 236  
 237  
 238  
 239  
 240  
 241  
 242  
 243  
 244  
 245  
 246  
 247  
 248  
 249  
 250  
 251  
 252  
 253  
 254  
 255  
 256  
 257  
 258  
 259  
 260  
 261  
 262  
 263  
 264  
 265  
 266  
 267  
 268  
 269  
 270  
 271  
 272  
 273  
 274  
 275  
 276  
 277  
 278  
 279  
 280  
 281  
 282  
 283  
 284  
 285  
 286  
 287  
 288  
 289  
 290  
 291  
 292  
 293  
 294  
 295  
 296  
 297  
 298  
 299  
 300  
 301  
 302  
 303  
 304  
 305  
 306  
 307  
 308  
 309  
 310  
 311  
 312  
 313  
 314  
 315  
 316  
 317  
 318  
 319  
 320  
 321  
 322  
 323  
 324  
 325  
 326  
 327  
 328  
 329  
 330  
 331  
 332  
 333  
 334  
 335  
 336  
 337  
 338  
 339  
 340  
 341  
 342  
 343  
 344  
 345  
 346  
 347  
 348  
 349  
 350  
 351  
 352  
 353  
 354  
 355  
 356  
 357  
 358  
 359  
 360  
 361  
 362  
 363  
 364  
 365  
 366  
 367  
 368  
 369  
 370  
 371  
 372  
 373  
 374  
 375  
 376  
 377  
 378  
 379  
 380  
 381  
 382  
 383  
 384  
 385  
 386  
 387  
 388  
 389  
 390  
 391  
 392  
 393  
 394  
 395  
 396  
 397  
 398  
 399  
 400  
 401  
 402  
 403  
 404  
 405  
 406  
 407  
 408  
 409  
 410  
 411  
 412  
 413  
 414  
 415  
 416  
 417  
 418  
 419  
 420  
 421  
 422  
 423  
 424  
 425  
 426  
 427  
 428  
 429  
 430  
 431  
 432  
 433  
 434  
 435  
 436  
 437  
 438  
 439  
 440  
 441  
 442  
 443  
 444  
 445  
 446  
 447  
 448  
 449  
 450  
 451  
 452  
 453  
 454  
 455  
 456  
 457  
 458  
 459  
 460  
 461  
 462  
 463  
 464  
 465  
 466  
 467  
 468  
 469  
 470  
 471  
 472  
 473  
 474  
 475  
 476  
 477  
 478  
 479  
 480  
 481  
 482  
 483  
 484  
 485  
 486  
 487  
 488  
 489  
 490  
 491  
 492  
 493  
 494  
 495  
 496  
 497  
 498  
 499  
 500  
 501  
 502  
 503  
 504  
 505  
 506  
 507  
 508  
 509  
 510  
 511  
 512  
 513  
 514  
 515  
 516  
 517  
 518  
 519  
 520  
 521  
 522  
 523  
 524  
 525  
 526  
 527  
 528  
 529  
 530  
 531  
 532  
 533  
 534  
 535  
 536  
 537  
 538  
 539  
 540  
 541  
 542  
 543  
 544  
 545  
 546  
 547  
 548  
 549  
 550  
 551  
 552  
 553  
 554  
 555  
 556  
 557  
 558  
 559  
 560  
 561  
 562  
 563  
 564  
 565  
 566  
 567  
 568  
 569  
 570  
 571  
 572  
 573  
 574  
 575  
 576  
 577  
 578  
 579  
 580  
 581  
 582  
 583  
 584  
 585  
 586  
 587  
 588  
 589  
 590  
 591  
 592  
 593  
 594  
 595  
 596  
 597  
 598  
 599  
 600  
 601  
 602  
 603  
 604  
 605  
 606  
 607  
 608  
 609  
 610  
 611  
 612  
 613  
 614  
 615  
 616  
 617  
 618  
 619  
 620  
 621  
 622  
 623  
 624  
 625  
 626  
 627  
 628  
 629  
 630  
 631  
 632  
 633  
 634  
 635  
 636  
 637  
 638  
 639  
 640  
 641  
 642  
 643  
 644  
 645  
 646  
 647  
 648  
 649  
 650  
 651  
 652  
 653  
 654  
 655  
 656  
 657  
 658  
 659  
 660  
 661  
 662  
 663  
 664  
 665  
 666  
 667  
 668  
 669  
 670  
 671  
 672  
 673  
 674  
 675  
 676  
 677  
 678  
 679  
 680  
 681  
 682  
 683  
 684  
 685  
 686  
 687  
 688  
 689  
 690  
 691  
 692  
 693  
 694  
 695  
 696  
 697  
 698  
 699  
 700  
 701  
 702  
 703  
 704  
 705  
 706  
 707  
 708  
 709  
 710  
 711  
 712  
 713  
 714  
 715  
 716  
 717  
 718  
 719  
 720  
 721  
 722  
 723  
 724  
 725  
 726  
 727  
 728  
 729  
 730  
 731  
 732  
 733  
 734  
 735  
 736  
 737  
 738  
 739  
 740  
 741  
 742  
 743  
 744  
 745  
 746  
 747  
 748  
 749  
 750  
 751  
 752  
 753  
 754  
 755  
 756  
 757  
 758  
 759  
 760  
 761  
 762  
 763  
 764  
 765  
 766  
 767  
 768  
 769  
 770  
 771  
 772  
 773  
 774  
 775  
 776  
 777  
 778  
 779  
 780  
 781  
 782  
 783  
 784  
 785  
 786  
 787  
 788  
 789  
 790  
 791  
 792  
 793  
 794  
 795  
 796  
 797  
 798  
 799  
 800  
 801  
 802  
 803  
 804  
 805  
 806  
 807  
 808  
 809  
 810  
 811  
 812  
 813  
 814  
 815  
 816  
 817  
 818  
 819  
 820  
 821  
 822  
 823  
 824  
 825  
 826  
 827  
 828  
 829  
 830  
 831  
 832  
 833  
 834  
 835  
 836  
 837  
 838  
 839  
 840  
 841  
 842  
 843  
 844  
 845  
 846  
 847  
 848  
 849  
 850  
 851  
 852  
 853  
 854  
 855  
 856  
 857  
 858  
 859  
 860  
 861  
 862  
 863  
 864  
 865  
 866  
 867  
 868  
 869  
 870  
 871  
 872  
 873  
 874  
 875  
 876  
 877  
 878  
 879  
 880  
 881  
 882  
 883  
 884  
 885  
 886  
 887  
 888  
 889  
 890  
 891  
 892  
 893  
 894  
 895  
 896  
 897  
 898  
 899  
 900  
 901  
 902  
 903  
 904  
 905  
 906  
 907  
 908  
 909  
 910  
 911  
 912  
 913  
 914  
 915  
 916  
 917  
 918  
 919  
 920  
 921  
 922  
 923  
 924  
 925  
 926  
 927  
 928  
 929  
 930  
 931  
 932  
 933  
 934  
 935  
 936  
 937  
 938  
 939  
 940  
 941  
 942  
 943  
 944  
 945  
 946  
 947  
 948  
 949  
 950  
 951  
 952  
 953  
 954  
 955  
 956  
 957  
 958  
 959  
 960  
 961  
 962  
 963  
 964  
 965  
 966  
 967  
 968  
 969  
 970  
 971  
 972  
 973  
 974  
 975  
 976  
 977  
 978  
 979  
 980  
 981  
 982  
 983  
 984  
 985  
 986  
 987  
 988  
 989  
 990  
 991  
 992  
 993  
 994  
 995  
 996  
 997  
 998  
 999  
 1000

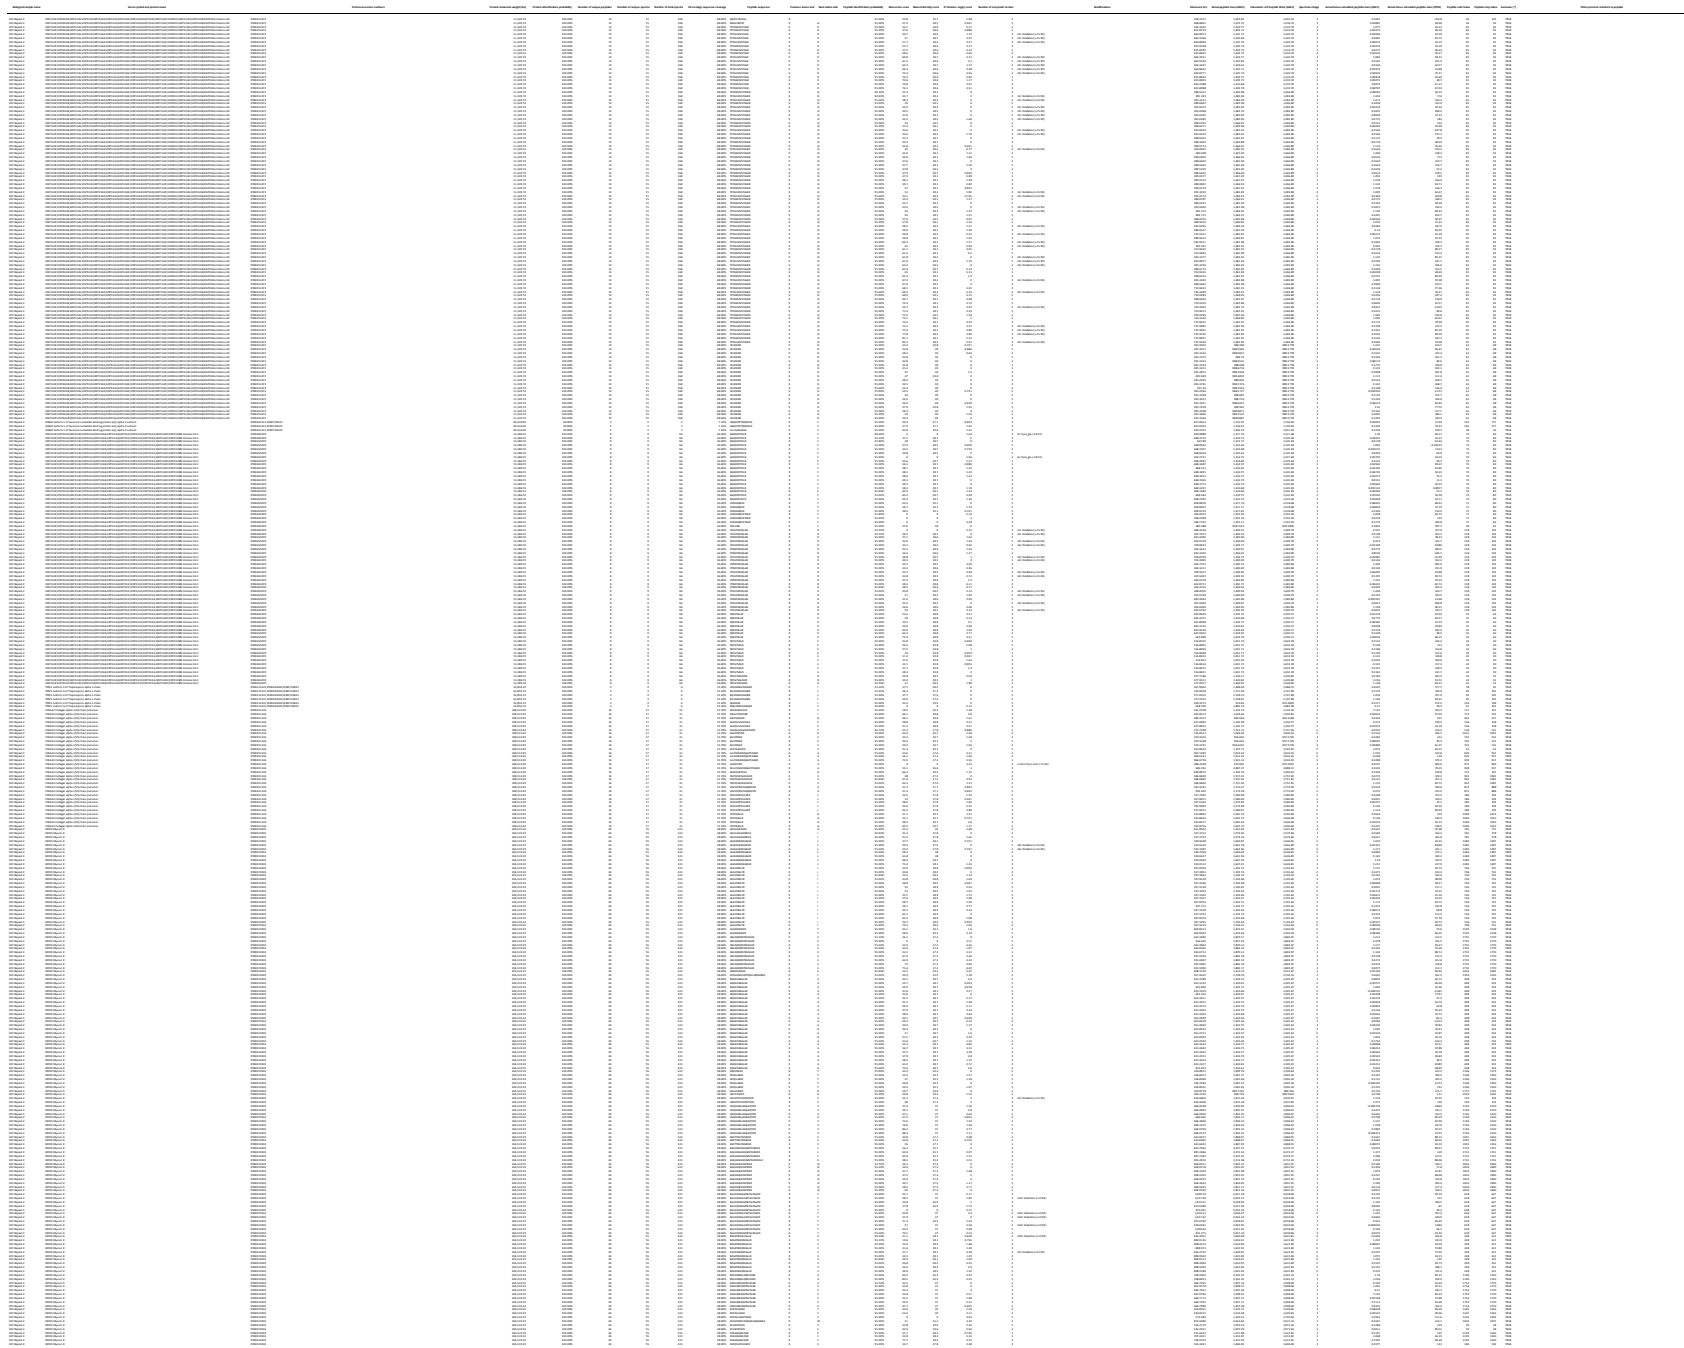

| Item No. | Description | Quantity | Unit | Rate | Amount |
|----------|-------------|----------|------|------|--------|
| 1        | ...         | ...      | ...  | ...  | ...    |
| 2        | ...         | ...      | ...  | ...  | ...    |
| 3        | ...         | ...      | ...  | ...  | ...    |
| 4        | ...         | ...      | ...  | ...  | ...    |
| 5        | ...         | ...      | ...  | ...  | ...    |
| 6        | ...         | ...      | ...  | ...  | ...    |
| 7        | ...         | ...      | ...  | ...  | ...    |
| 8        | ...         | ...      | ...  | ...  | ...    |
| 9        | ...         | ...      | ...  | ...  | ...    |
| 10       | ...         | ...      | ...  | ...  | ...    |
| 11       | ...         | ...      | ...  | ...  | ...    |
| 12       | ...         | ...      | ...  | ...  | ...    |
| 13       | ...         | ...      | ...  | ...  | ...    |
| 14       | ...         | ...      | ...  | ...  | ...    |
| 15       | ...         | ...      | ...  | ...  | ...    |
| 16       | ...         | ...      | ...  | ...  | ...    |
| 17       | ...         | ...      | ...  | ...  | ...    |
| 18       | ...         | ...      | ...  | ...  | ...    |
| 19       | ...         | ...      | ...  | ...  | ...    |
| 20       | ...         | ...      | ...  | ...  | ...    |
| 21       | ...         | ...      | ...  | ...  | ...    |
| 22       | ...         | ...      | ...  | ...  | ...    |
| 23       | ...         | ...      | ...  | ...  | ...    |
| 24       | ...         | ...      | ...  | ...  | ...    |
| 25       | ...         | ...      | ...  | ...  | ...    |
| 26       | ...         | ...      | ...  | ...  | ...    |
| 27       | ...         | ...      | ...  | ...  | ...    |
| 28       | ...         | ...      | ...  | ...  | ...    |
| 29       | ...         | ...      | ...  | ...  | ...    |
| 30       | ...         | ...      | ...  | ...  | ...    |
| 31       | ...         | ...      | ...  | ...  | ...    |
| 32       | ...         | ...      | ...  | ...  | ...    |
| 33       | ...         | ...      | ...  | ...  | ...    |
| 34       | ...         | ...      | ...  | ...  | ...    |
| 35       | ...         | ...      | ...  | ...  | ...    |
| 36       | ...         | ...      | ...  | ...  | ...    |
| 37       | ...         | ...      | ...  | ...  | ...    |
| 38       | ...         | ...      | ...  | ...  | ...    |
| 39       | ...         | ...      | ...  | ...  | ...    |
| 40       | ...         | ...      | ...  | ...  | ...    |
| 41       | ...         | ...      | ...  | ...  | ...    |
| 42       | ...         | ...      | ...  | ...  | ...    |
| 43       | ...         | ...      | ...  | ...  | ...    |
| 44       | ...         | ...      | ...  | ...  | ...    |
| 45       | ...         | ...      | ...  | ...  | ...    |
| 46       | ...         | ...      | ...  | ...  | ...    |
| 47       | ...         | ...      | ...  | ...  | ...    |
| 48       | ...         | ...      | ...  | ...  | ...    |
| 49       | ...         | ...      | ...  | ...  | ...    |
| 50       | ...         | ...      | ...  | ...  | ...    |
| 51       | ...         | ...      | ...  | ...  | ...    |
| 52       | ...         | ...      | ...  | ...  | ...    |
| 53       | ...         | ...      | ...  | ...  | ...    |
| 54       | ...         | ...      | ...  | ...  | ...    |
| 55       | ...         | ...      | ...  | ...  | ...    |
| 56       | ...         | ...      | ...  | ...  | ...    |
| 57       | ...         | ...      | ...  | ...  | ...    |
| 58       | ...         | ...      | ...  | ...  | ...    |
| 59       | ...         | ...      | ...  | ...  | ...    |
| 60       | ...         | ...      | ...  | ...  | ...    |
| 61       | ...         | ...      | ...  | ...  | ...    |
| 62       | ...         | ...      | ...  | ...  | ...    |
| 63       | ...         | ...      | ...  | ...  | ...    |
| 64       | ...         | ...      | ...  | ...  | ...    |
| 65       | ...         | ...      | ...  | ...  | ...    |
| 66       | ...         | ...      | ...  | ...  | ...    |
| 67       | ...         | ...      | ...  | ...  | ...    |
| 68       | ...         | ...      | ...  | ...  | ...    |
| 69       | ...         | ...      | ...  | ...  | ...    |
| 70       | ...         | ...      | ...  | ...  | ...    |
| 71       | ...         | ...      | ...  | ...  | ...    |
| 72       | ...         | ...      | ...  | ...  | ...    |
| 73       | ...         | ...      | ...  | ...  | ...    |
| 74       | ...         | ...      | ...  | ...  | ...    |
| 75       | ...         | ...      | ...  | ...  | ...    |
| 76       | ...         | ...      | ...  | ...  | ...    |
| 77       | ...         | ...      | ...  | ...  | ...    |
| 78       | ...         | ...      | ...  | ...  | ...    |
| 79       | ...         | ...      | ...  | ...  | ...    |
| 80       | ...         | ...      | ...  | ...  | ...    |
| 81       | ...         | ...      | ...  | ...  | ...    |
| 82       | ...         | ...      | ...  | ...  | ...    |
| 83       | ...         | ...      | ...  | ...  | ...    |
| 84       | ...         | ...      | ...  | ...  | ...    |
| 85       | ...         | ...      | ...  | ...  | ...    |
| 86       | ...         | ...      | ...  | ...  | ...    |
| 87       | ...         | ...      | ...  | ...  | ...    |
| 88       | ...         | ...      | ...  | ...  | ...    |
| 89       | ...         | ...      | ...  | ...  | ...    |
| 90       | ...         | ...      | ...  | ...  | ...    |
| 91       | ...         | ...      | ...  | ...  | ...    |
| 92       | ...         | ...      | ...  | ...  | ...    |
| 93       | ...         | ...      | ...  | ...  | ...    |
| 94       | ...         | ...      | ...  | ...  | ...    |
| 95       | ...         | ...      | ...  | ...  | ...    |
| 96       | ...         | ...      | ...  | ...  | ...    |
| 97       | ...         | ...      | ...  | ...  | ...    |
| 98       | ...         | ...      | ...  | ...  | ...    |
| 99       | ...         | ...      | ...  | ...  | ...    |
| 100      | ...         | ...      | ...  | ...  | ...    |

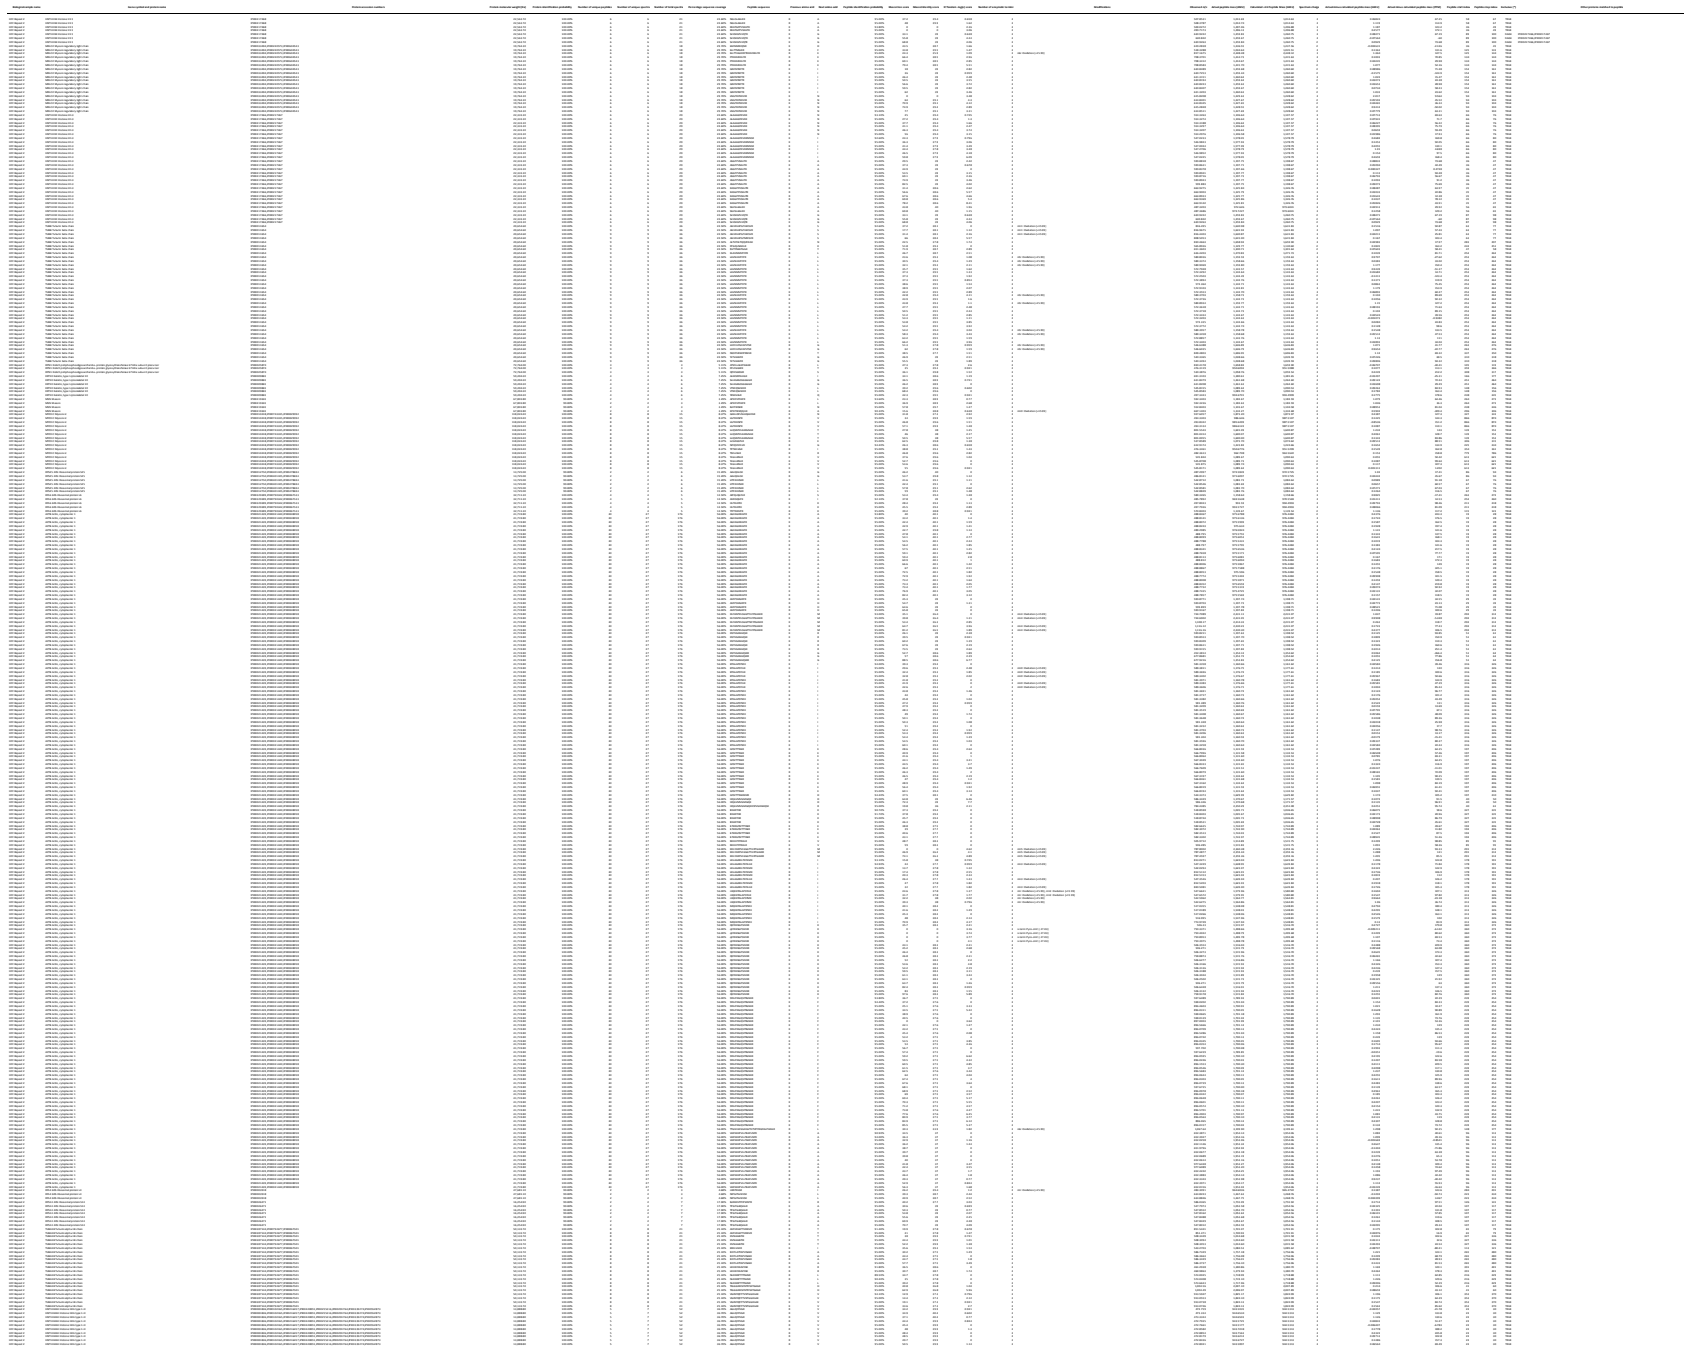

The image shows a document page that is extremely blurry and has low contrast. It appears to contain a table or a list of items, but the text is completely illegible. There are some faint rectangular shapes and lines that suggest a structured layout, but no specific content can be discerned. The overall appearance is that of a scan of a document that has been significantly degraded or is of very poor quality.





| Item No. | Description | Quantity | Unit | Rate | Amount |
|----------|-------------|----------|------|------|--------|
| 1        | ...         | ...      | ...  | ...  | ...    |
| 2        | ...         | ...      | ...  | ...  | ...    |
| 3        | ...         | ...      | ...  | ...  | ...    |
| 4        | ...         | ...      | ...  | ...  | ...    |
| 5        | ...         | ...      | ...  | ...  | ...    |
| 6        | ...         | ...      | ...  | ...  | ...    |
| 7        | ...         | ...      | ...  | ...  | ...    |
| 8        | ...         | ...      | ...  | ...  | ...    |
| 9        | ...         | ...      | ...  | ...  | ...    |
| 10       | ...         | ...      | ...  | ...  | ...    |
| 11       | ...         | ...      | ...  | ...  | ...    |
| 12       | ...         | ...      | ...  | ...  | ...    |
| 13       | ...         | ...      | ...  | ...  | ...    |
| 14       | ...         | ...      | ...  | ...  | ...    |
| 15       | ...         | ...      | ...  | ...  | ...    |
| 16       | ...         | ...      | ...  | ...  | ...    |
| 17       | ...         | ...      | ...  | ...  | ...    |
| 18       | ...         | ...      | ...  | ...  | ...    |
| 19       | ...         | ...      | ...  | ...  | ...    |
| 20       | ...         | ...      | ...  | ...  | ...    |
| 21       | ...         | ...      | ...  | ...  | ...    |
| 22       | ...         | ...      | ...  | ...  | ...    |
| 23       | ...         | ...      | ...  | ...  | ...    |
| 24       | ...         | ...      | ...  | ...  | ...    |
| 25       | ...         | ...      | ...  | ...  | ...    |
| 26       | ...         | ...      | ...  | ...  | ...    |
| 27       | ...         | ...      | ...  | ...  | ...    |
| 28       | ...         | ...      | ...  | ...  | ...    |
| 29       | ...         | ...      | ...  | ...  | ...    |
| 30       | ...         | ...      | ...  | ...  | ...    |
| 31       | ...         | ...      | ...  | ...  | ...    |
| 32       | ...         | ...      | ...  | ...  | ...    |
| 33       | ...         | ...      | ...  | ...  | ...    |
| 34       | ...         | ...      | ...  | ...  | ...    |
| 35       | ...         | ...      | ...  | ...  | ...    |
| 36       | ...         | ...      | ...  | ...  | ...    |
| 37       | ...         | ...      | ...  | ...  | ...    |
| 38       | ...         | ...      | ...  | ...  | ...    |
| 39       | ...         | ...      | ...  | ...  | ...    |
| 40       | ...         | ...      | ...  | ...  | ...    |
| 41       | ...         | ...      | ...  | ...  | ...    |
| 42       | ...         | ...      | ...  | ...  | ...    |
| 43       | ...         | ...      | ...  | ...  | ...    |
| 44       | ...         | ...      | ...  | ...  | ...    |
| 45       | ...         | ...      | ...  | ...  | ...    |
| 46       | ...         | ...      | ...  | ...  | ...    |
| 47       | ...         | ...      | ...  | ...  | ...    |
| 48       | ...         | ...      | ...  | ...  | ...    |
| 49       | ...         | ...      | ...  | ...  | ...    |
| 50       | ...         | ...      | ...  | ...  | ...    |
| 51       | ...         | ...      | ...  | ...  | ...    |
| 52       | ...         | ...      | ...  | ...  | ...    |
| 53       | ...         | ...      | ...  | ...  | ...    |
| 54       | ...         | ...      | ...  | ...  | ...    |
| 55       | ...         | ...      | ...  | ...  | ...    |
| 56       | ...         | ...      | ...  | ...  | ...    |
| 57       | ...         | ...      | ...  | ...  | ...    |
| 58       | ...         | ...      | ...  | ...  | ...    |
| 59       | ...         | ...      | ...  | ...  | ...    |
| 60       | ...         | ...      | ...  | ...  | ...    |
| 61       | ...         | ...      | ...  | ...  | ...    |
| 62       | ...         | ...      | ...  | ...  | ...    |
| 63       | ...         | ...      | ...  | ...  | ...    |
| 64       | ...         | ...      | ...  | ...  | ...    |
| 65       | ...         | ...      | ...  | ...  | ...    |
| 66       | ...         | ...      | ...  | ...  | ...    |
| 67       | ...         | ...      | ...  | ...  | ...    |
| 68       | ...         | ...      | ...  | ...  | ...    |
| 69       | ...         | ...      | ...  | ...  | ...    |
| 70       | ...         | ...      | ...  | ...  | ...    |
| 71       | ...         | ...      | ...  | ...  | ...    |
| 72       | ...         | ...      | ...  | ...  | ...    |
| 73       | ...         | ...      | ...  | ...  | ...    |
| 74       | ...         | ...      | ...  | ...  | ...    |
| 75       | ...         | ...      | ...  | ...  | ...    |
| 76       | ...         | ...      | ...  | ...  | ...    |
| 77       | ...         | ...      | ...  | ...  | ...    |
| 78       | ...         | ...      | ...  | ...  | ...    |
| 79       | ...         | ...      | ...  | ...  | ...    |
| 80       | ...         | ...      | ...  | ...  | ...    |
| 81       | ...         | ...      | ...  | ...  | ...    |
| 82       | ...         | ...      | ...  | ...  | ...    |
| 83       | ...         | ...      | ...  | ...  | ...    |
| 84       | ...         | ...      | ...  | ...  | ...    |
| 85       | ...         | ...      | ...  | ...  | ...    |
| 86       | ...         | ...      | ...  | ...  | ...    |
| 87       | ...         | ...      | ...  | ...  | ...    |
| 88       | ...         | ...      | ...  | ...  | ...    |
| 89       | ...         | ...      | ...  | ...  | ...    |
| 90       | ...         | ...      | ...  | ...  | ...    |
| 91       | ...         | ...      | ...  | ...  | ...    |
| 92       | ...         | ...      | ...  | ...  | ...    |
| 93       | ...         | ...      | ...  | ...  | ...    |
| 94       | ...         | ...      | ...  | ...  | ...    |
| 95       | ...         | ...      | ...  | ...  | ...    |
| 96       | ...         | ...      | ...  | ...  | ...    |
| 97       | ...         | ...      | ...  | ...  | ...    |
| 98       | ...         | ...      | ...  | ...  | ...    |
| 99       | ...         | ...      | ...  | ...  | ...    |
| 100      | ...         | ...      | ...  | ...  | ...    |



| Project Name | Project ID | Project Manager | Project Status | Project Start Date | Project End Date | Project Budget | Project Actual Cost | Project Variance | Project Risk Level | Project Complexity | Project Stakeholders | Project Deliverables      | Project Milestones | Project Key Issues                      | Project Next Steps                      |
|--------------|------------|-----------------|----------------|--------------------|------------------|----------------|---------------------|------------------|--------------------|--------------------|----------------------|---------------------------|--------------------|-----------------------------------------|-----------------------------------------|
| Project A    | 101        | John Doe        | Completed      | 2023-01-01         | 2023-03-31       | \$1,000,000    | \$950,000           | \$50,000         | Low                | Medium             | Client, Team         | Website Launch            | 2023-02-15         | Minor bugs fixed                        | Final review and deployment             |
| Project B    | 102        | Jane Smith      | In Progress    | 2023-04-01         | 2023-06-30       | \$2,500,000    | \$1,800,000         | -\$700,000       | Medium             | High               | Client, Team, Vendor | Mobile App Development    | 2023-05-01         | Scope creep, budget issues              | Review progress and adjust resources    |
| Project C    | 103        | Mike Johnson    | On Hold        | 2023-03-15         | 2023-09-30       | \$800,000      | \$200,000           | -\$600,000       | High               | Low                | Client, Team         | Cloud Migration           | 2023-04-01         | Client budget cut                       | Re-evaluate project viability           |
| Project D    | 104        | Sarah Lee       | Planning       | 2023-07-01         | 2023-12-31       | \$1,200,000    | \$100,000           | -\$1,100,000     | Low                | Medium             | Client, Team         | New Product Development   | 2023-07-15         | Market research, requirements gathering | Finalize requirements and start design  |
| Project E    | 105        | David Brown     | Completed      | 2022-10-01         | 2023-01-31       | \$500,000      | \$520,000           | \$20,000         | Low                | Low                | Client, Team         | IT Infrastructure Upgrade | 2022-11-01         | Hardware delays                         | Successful completion and user training |

**Table S3 GO analysis**

Summary of all enriched GO terms for HFF and LX-2 (top-level GO terms from the Cellular Component and Biological Process domains, second-level GO terms from the Molecular Function domain, and KEGG Pathway terms) Terms with fold enrichment value  $\geq 1.5$ , Bonferroni-corrected P-value  $< 0.05$ , EASE score (modified Fisher Exact P-value)  $< 0.05$  and at least two proteins per term were considered significantly enriched

| Category     | Cell Type | Term                                                   | Count (number of proteins per term) | Fold Enrichment | Bonferroni-corrected P value |
|--------------|-----------|--------------------------------------------------------|-------------------------------------|-----------------|------------------------------|
| GOTERM_BP_1  | HFF       | GO:0022610~biological adhesion                         | 20                                  | 3.81            | 1.68E-05                     |
| GOTERM_BP_1  | HFF       | GO:0051179~localization                                | 37                                  | 1.73            | 1.02E-02                     |
| GOTERM_BP_1  | HFF       | GO:0032502~developmental process                       | 37                                  | 1.68            | 1.87E-02                     |
| Category     | Cell Type | Term                                                   | Count (number of proteins per term) | Fold Enrichment | Bonferroni-corrected P value |
| GOTERM_BP_1  | LX-2      | GO:0051179~localization                                | 75                                  | 1.55            | 8.84E-04                     |
| GOTERM_BP_1  | LX-2      | GO:0010467~gene expression                             | 83                                  | 1.47            | 1.78E-03                     |
| GOTERM_BP_1  | LX-2      | GO:0022610~biological adhesion                         | 27                                  | 2.28            | 2.80E-03                     |
| GOTERM_BP_1  | LX-2      | GO:0032502~developmental process                       | 74                                  | 1.48            | 4.50E-03                     |
| Category     | Cell Type | Term                                                   | Count (number of proteins per term) | Fold Enrichment | Bonferroni-corrected P value |
| GOTERM_CC_1  | HFF       | GO:0031012~extracellular matrix                        | 23                                  | 9.47            | 3.20E-14                     |
| GOTERM_CC_1  | HFF       | GO:0044420~extracellular matrix part                   | 15                                  | 18.97           | 6.31E-13                     |
| GOTERM_CC_1  | HFF       | GO:0044422~organelle part                              | 61                                  | 2.51            | 1.11E-12                     |
| GOTERM_CC_1  | HFF       | GO:0032991~macromolecular complex                      | 51                                  | 2.82            | 9.00E-12                     |
| GOTERM_CC_1  | HFF       | GO:0044421~extracellular region part                   | 25                                  | 4.40            | 1.88E-08                     |
| GOTERM_CC_1  | HFF       | GO:0005576~extracellular region                        | 28                                  | 2.99            | 4.74E-06                     |
| Category     | Cell Type | Term                                                   | Count (number of proteins per term) | Fold Enrichment | Bonferroni-corrected P value |
| GOTERM_CC_1  | LX-2      | GO:0044422~organelle part                              | 146                                 | 2.69            | 1.19E-35                     |
| GOTERM_CC_1  | LX-2      | GO:0032991~macromolecular complex                      | 120                                 | 2.98            | 4.80E-31                     |
| GOTERM_CC_1  | LX-2      | GO:0044420~extracellular matrix part                   | 21                                  | 11.92           | 1.07E-14                     |
| GOTERM_CC_1  | LX-2      | GO:0043226~organelle                                   | 188                                 | 1.47            | 3.91E-14                     |
| GOTERM_CC_1  | LX-2      | GO:0031012~extracellular matrix                        | 29                                  | 5.36            | 1.43E-11                     |
| GOTERM_CC_1  | LX-2      | GO:0044421~extracellular region part                   | 34                                  | 2.69            | 6.30E-06                     |
| GOTERM_CC_1  | LX-2      | GO:0031975~envelope                                    | 26                                  | 3.00            | 3.08E-05                     |
| GOTERM_CC_1  | LX-2      | GO:0005576~extracellular region                        | 44                                  | 2.11            | 5.57E-05                     |
| Category     | Cell Type | Term                                                   | Count (number of proteins per term) | Fold Enrichment | Bonferroni-corrected P value |
| GOTERM_MF_2  | HFF       | GO:0003735~structural constituent of ribosome          | 23                                  | 11.35           | 4.89E-15                     |
| GOTERM_MF_2  | HFF       | GO:0005200~structural constituent of cytoskeleton      | 13                                  | 22.56           | 4.59E-11                     |
| GOTERM_MF_2  | HFF       | GO:0005201~extracellular matrix structural constituent | 13                                  | 18.34           | 5.76E-10                     |
| GOTERM_MF_2  | HFF       | GO:0005515~protein binding                             | 81                                  | 1.70            | 1.76E-08                     |
| GOTERM_MF_2  | HFF       | GO:0015482~voltage-gated anion channel porin activity  | 3                                   | 150.95          | 1.44E-02                     |
| GOTERM_MF_2  | HFF       | GO:0001871~pattern binding                             | 7                                   | 8.81            | 1.57E-02                     |
| Category     | Cell Type | Term                                                   | Count (number of proteins per term) | Fold Enrichment | Bonferroni-corrected P value |
| GOTERM_MF_2  | LX-2      | GO:0003735~structural constituent of ribosome          | 55                                  | 12.17           | 6.22E-41                     |
| GOTERM_MF_2  | LX-2      | GO:0005515~protein binding                             | 167                                 | 1.57            | 4.81E-13                     |
| GOTERM_MF_2  | LX-2      | GO:0005200~structural constituent of cytoskeleton      | 16                                  | 12.45           | 2.47E-10                     |
| GOTERM_MF_2  | LX-2      | GO:0005201~extracellular matrix structural constituent | 17                                  | 10.76           | 4.39E-10                     |
| Category     | Cell Type | Term                                                   | Count (number of proteins per term) | Fold Enrichment | Bonferroni-corrected P value |
| KEGG_PATHWAY | HFF       | hsa01430:Cell Communication                            | 19                                  | 8.53            | 3.05E-10                     |
| KEGG_PATHWAY | HFF       | hsa03010:Ribosome                                      | 16                                  | 9.77            | 4.66E-09                     |
| KEGG_PATHWAY | HFF       | hsa04512:ECM-receptor interaction                      | 12                                  | 8.32            | 2.04E-05                     |
| KEGG_PATHWAY | HFF       | hsa04510:Focal adhesion                                | 13                                  | 3.99            | 1.24E-02                     |
| Category     | Cell Type | Term                                                   | Count (number of proteins per term) | Fold Enrichment | Bonferroni-corrected P value |
| KEGG_PATHWAY | LX-2      | hsa03010:Ribosome                                      | 40                                  | 12.21           | 1.16E-31                     |
| KEGG_PATHWAY | LX-2      | hsa01430:Cell Communication                            | 27                                  | 6.06            | 1.14E-11                     |
| KEGG_PATHWAY | LX-2      | hsa04512:ECM-receptor interaction                      | 17                                  | 5.90            | 2.57E-06                     |
| KEGG_PATHWAY | LX-2      | hsa04510:Focal adhesion                                | 20                                  | 3.07            | 3.49E-03                     |

**Table S4. Quantification of identified proteins**

Unweighted Spectrum Counts were normalised to total observed spectra for each respective biological repeat and expressed as a percentage  
 Total observed spectra were 63384 for LX-2 repeat 1, 69368 for LX-2 repeat 2, 70371 for LX-2 repeat 3, 78656 for HFF repeat 1, 75428 for HFF repeat 2 and 70500 for HFF repeat 3  
 Mean percentage spectral counts were calculated and used for hierarchical clustering

| Identified Proteins (277)                                                                         | Accession Number | Molecular Weight | Unweighted spectrum counts |            |               |            |               |            | Normalised spectral counts (%) |            |              |            |              |            | Mean normalised spectral counts (%) |            |          |            |          |            |         |            |
|---------------------------------------------------------------------------------------------------|------------------|------------------|----------------------------|------------|---------------|------------|---------------|------------|--------------------------------|------------|--------------|------------|--------------|------------|-------------------------------------|------------|----------|------------|----------|------------|---------|------------|
|                                                                                                   |                  |                  | LX-2 repeat 1              |            | LX-2 repeat 2 |            | LX-2 repeat 3 |            | HFF repeat 1                   |            | HFF repeat 2 |            | HFF repeat 3 |            | LX-2 mean                           |            | LX-2 std |            | HFF mean |            | HFF std |            |
|                                                                                                   |                  |                  | Count                      | Percentage | Count         | Percentage | Count         | Percentage | Count                          | Percentage | Count        | Percentage | Count        | Percentage | Count                               | Percentage | Count    | Percentage | Count    | Percentage | Count   | Percentage |
| A2M Alpha-2-macroglobulin precursor                                                               | IP00478003       | 163 kDa          | 0                          | 13         | 0             | 0          | 0             | 0          | 0                              | 6          | 0            | 0.01881    | 0            | 0          | 0                                   | 0.00851    | 0        | 0.00627    | 0.01086  | 0.00284    | 0.00491 |            |
| ABCD3 ATP-binding cassette sub-family D member 3                                                  | IP00023272       | 75 kDa           | 11                         | 0          | 3             | 0          | 0             | 0          | 0                              | 0          | 0.01609      | 0          | 0.00426      | 0          | 0                                   | 0          | 0        | 0.00678    | 0.00833  | 0          | 0       |            |
| ACTA1 Actin, alpha skeletal muscle                                                                | IP00021428       | 42 kDa           | 518                        | 0          | 79            | 148        | 126           | 0          | 0                              | 0.08043    | 0            | 0.11226    | 0.18816      | 0.16705    | 0                                   | 0          | 0.06423  | 0.05786    | 0.11840  | 0.10308    |         |            |
| ACTB Actin, cytoplasmic II                                                                        | IP00021430       | 42 kDa           | 118                        | 7          | 113           | 209        | 176           | 34         | 0                              | 0.17255    | 0.01013      | 0.19468    | 0.26571      | 0.23314    | 0.04821                             | 0          | 0.12579  | 0.10077    | 0.16243  | 0.11734    |         |            |
| ACTN1 Alpha-actinin-1                                                                             | IP00015028       | 103 kDa          | 5                          | 0          | 4             | 0          | 0             | 0          | 0                              | 0.00585    | 0            | 0.00568    | 0.00351      | 0          | 0                                   | 0          | 0.00384  | 0.00333    | 0.00127  | 0.00220    |         |            |
| ACTR2 Actin-related protein 2                                                                     | IP00005159       | 45 kDa           | 4                          | 0          | 5             | 0          | 0             | 0          | 0                              | 0.01024    | 0            | 0.00711    | 0            | 0          | 0                                   | 0          | 0.00578  | 0.00525    | 0        | 0          |         |            |
| ACTR3 Actin-related protein 3                                                                     | IP00028091       | 47 kDa           | 10                         | 0          | 8             | 2          | 0             | 0          | 0                              | 0.01462    | 0            | 0.01137    | 0.00254      | 0          | 0                                   | 0          | 0.00866  | 0.00768    | 0.00085  | 0.00147    |         |            |
| ADAMTSL1 ADAMTS-1 precursor                                                                       | IP00005908       | 105 kDa          | 16                         | 0          | 0             | 2          | 0             | 0          | 0                              | 0.00877    | 0            | 0.00284    | 0            | 0          | 0                                   | 0.00265    | 0        | 0          | 0.00088  | 0.00153    |         |            |
| AGRN Agrin precursor                                                                              | IP000174563      | 215 kDa          | 0                          | 0          | 13            | 0          | 0             | 0          | 0                              | 0.02340    | 0            | 0.01847    | 0            | 0          | 0                                   | 0          | 0.01396  | 0.01254    | 0        | 0          |         |            |
| ANPEP Aminopeptidase N (CD13)                                                                     | IP00021224       | 110 kDa          | 0                          | 0          | 0             | 25         | 33            | 0          | 0                              | 0          | 0            | 0.03178    | 0.04375      | 0          | 0                                   | 0          | 0        | 0.02518    | 0.02261  |            |         |            |
| ANXA1 Annexin A1                                                                                  | IP000218918      | 39 kDa           | 2                          | 0          | 0             | 0          | 0             | 0          | 0                              | 0.00292    | 0            | 0          | 0            | 0          | 0                                   | 0          | 0.00097  | 0.00169    | 0        | 0          |         |            |
| ANXA2 Annexin A2                                                                                  | IP000455315      | 39 kDa           | 6                          | 0          | 6             | 4          | 2             | 0          | 0                              | 0.00877    | 0            | 0.00853    | 0.00509      | 0.00265    | 0                                   | 0          | 0.00577  | 0.00500    | 0.00258  | 0.00254    |         |            |
| ANXA5 Annexin A5                                                                                  | IP000228001      | 36 kDa           | 6                          | 0          | 2             | 0          | 0             | 0          | 0                              | 0.00877    | 0            | 0.00284    | 0            | 0          | 0                                   | 0          | 0.00387  | 0.00446    | 0        | 0          |         |            |
| ANXA6 Annexin A6                                                                                  | IP00021226       | 76 kDa           | 26                         | 0          | 34            | 14         | 17            | 0          | 0                              | 0.03802    | 0            | 0.04832    | 0.01780      | 0.02254    | 0                                   | 0          | 0.02878  | 0.02545    | 0.01345  | 0.01188    |         |            |
| ARF1 ADP-ribosylation factor 1                                                                    | IP000215914      | 21 kDa           | 0                          | 0          | 7             | 0          | 0             | 0          | 0                              | 0          | 0.00995      | 0          | 0            | 0          | 0                                   | 0          | 0.00332  | 0.00574    | 0        | 0          |         |            |
| ARPC2 Actin-related protein 2/3 complex subunit 2                                                 | IP00005161       | 34 kDa           | 3                          | 0          | 3             | 0          | 2             | 0          | 0                              | 0.00439    | 0            | 0.00426    | 0            | 0.00265    | 0                                   | 0          | 0.00288  | 0.00250    | 0.00088  | 0.00153    |         |            |
| ARPC3 Actin-related protein 2/3 complex subunit 3                                                 | IP00005162       | 21 kDa           | 6                          | 0          | 6             | 0          | 0             | 0          | 0                              | 0.00877    | 0            | 0.00853    | 0            | 0          | 0                                   | 0          | 0.00577  | 0.00500    | 0.00258  | 0.00254    |         |            |
| ARPC4 Actin-related protein 2/3 complex subunit 4                                                 | IP00054811       | 20 kDa           | 0                          | 0          | 4             | 0          | 3             | 0          | 0                              | 0          | 0.00568      | 0          | 0.00398      | 0          | 0                                   | 0          | 0.00189  | 0.00328    | 0.00133  | 0.00230    |         |            |
| ATAD3A ATPase family, AAA domain containing 3A                                                    | IP000646144      | 64 kDa           | 3                          | 0          | 2             | 0          | 0             | 0          | 0                              | 0.00439    | 0            | 0.00284    | 0            | 0          | 0                                   | 0          | 0.00241  | 0.00223    | 0        | 0          |         |            |
| ATP5A1 ATP synthase subunit alpha, mitochondrial precursor                                        | IP00040493       | 60 kDa           | 8                          | 0          | 16            | 3          | 3             | 0          | 0                              | 0.01170    | 0            | 0.02274    | 0.00381      | 0.00398    | 0                                   | 0          | 0.01148  | 0.01137    | 0.00260  | 0.00225    |         |            |
| ATP5B1 ATP synthase subunit beta, mitochondrial precursor                                         | IP00023376       | 57 kDa           | 9                          | 0          | 25            | 6          | 5             | 0          | 0                              | 0.01316    | 0            | 0.03563    | 0.00763      | 0.00669    | 0                                   | 0          | 0.01623  | 0.01795    | 0.00475  | 0.00415    |         |            |
| ATP5F1 Isoform Liver of ATP synthase gamma chain, mitochondrial precursor                         | IP000478410      | 33 kDa           | 0                          | 0          | 4             | 0          | 0             | 0          | 0                              | 0          | 0.00568      | 0          | 0            | 0          | 0                                   | 0          | 0.00189  | 0.00328    | 0        | 0          |         |            |
| ATP5I2 Isoform 1 of ATP synthase f chain, mitochondrial precursor                                 | IP000220300      | 11 kDa           | 0                          | 0          | 3             | 0          | 0             | 0          | 0                              | 0          | 0.00426      | 0          | 0            | 0          | 0                                   | 0          | 0.00142  | 0.00246    | 0        | 0          |         |            |
| ATP5F5 ATP synthase subunit O, mitochondrial precursor                                            | IP000070611      | 23 kDa           | 0                          | 0          | 0             | 2          | 0             | 0          | 0                              | 0          | 0            | 0.00254    | 0            | 0          | 0                                   | 0          | 0        | 0.00085    | 0.00147  |            |         |            |
| BARF1 Barrier-to-autophagy factor                                                                 | IP000216807      | 6 kDa            | 15                         | 0          | 0             | 0          | 0             | 0          | 0                              | 0.02193    | 0            | 0          | 0            | 0          | 0                                   | 0          | 0.00731  | 0.01266    | 0        | 0          |         |            |
| BCAM Lutheran blood group glycoprotein precursor (CD239 - laminin receptor)                       | IP000024006      | 67 kDa           | 2                          | 0          | 0             | 0          | 0             | 0          | 0                              | 0.00292    | 0            | 0          | 0            | 0          | 0                                   | 0          | 0.00097  | 0.00169    | 0        | 0          |         |            |
| BCAP31 B-cell receptor-associated protein 31                                                      | IP000218200      | 35 kDa           | 0                          | 0          | 2             | 0          | 0             | 0          | 0                              | 0          | 0.00284      | 0          | 0            | 0          | 0                                   | 0          | 0.00095  | 0.00164    | 0        | 0          |         |            |
| BST1 ADP-ribosyl cyclase 2 precursor                                                              | IP000026240      | 36 kDa           | 3                          | 0          | 0             | 0          | 0             | 0          | 0                              | 0.00439    | 0            | 0          | 0            | 0          | 0                                   | 0          | 0.00146  | 0.00253    | 0        | 0          |         |            |
| C3 Complement C3 precursor (Fragment)                                                             | IP000789897      | 187 kDa          | 0                          | 2          | 5             | 0          | 0             | 7          | 0                              | 0.00289    | 0            | 0.00711    | 0            | 0          | 0.00993                             | 0          | 0.00333  | 0.00357    | 0.00331  | 0.00573    |         |            |
| C6A Complement C6-A precursor                                                                     | IP00023568       | 193 kDa          | 4                          | 0          | 4             | 0          | 0             | 0          | 0                              | 0.00279    | 0            | 0          | 0            | 0          | 0                                   | 0          | 0.00133  | 0.00334    | 0        | 0          |         |            |
| CAPZL1 F-actin-capping protein subunit alpha-1                                                    | IP000059669      | 33 kDa           | 3                          | 0          | 0             | 0          | 0             | 0          | 0                              | 0.00439    | 0            | 0          | 0            | 0          | 0                                   | 0          | 0.00146  | 0.00253    | 0        | 0          |         |            |
| CAV1 Caveolin                                                                                     | IP000853146      | 19 kDa           | 12                         | 0          | 14            | 0          | 0             | 0          | 0                              | 0.01755    | 0            | 0.01989    | 0            | 0          | 0                                   | 0          | 0.01248  | 0.01087    | 0        | 0          |         |            |
| CD44 Isoform 1 of CD44 antigen precursor                                                          | IP00027650       | 78 kDa           | 4                          | 0          | 0             | 4          | 5             | 0          | 0                              | 0.00585    | 0            | 0.00509    | 0.00663      | 0          | 0                                   | 0          | 0.00195  | 0.00338    | 0.00390  | 0.00347    |         |            |
| CDL1 Cedrin-1                                                                                     | IP000120111      | 19 kDa           | 0                          | 0          | 5             | 0          | 0             | 0          | 0                              | 0.00711    | 0            | 0.00237    | 0.00410      | 0          | 0                                   | 0          | 0.00287  | 0.00410    | 0        | 0          |         |            |
| CHCHD3 Coiled-coil-helix-coiled-coil helix domain-containing protein 3                            | IP00015833       | 26 kDa           | 0                          | 0          | 4             | 0          | 0             | 0          | 0                              | 0          | 0.00568      | 0          | 0            | 0          | 0                                   | 0          | 0.00189  | 0.00328    | 0        | 0          |         |            |
| CKAP4 Isoform 1 of Cytoskeleton-associated protein 4                                              | IP000141318      | 66 kDa           | 19                         | 0          | 8             | 12         | 10            | 0          | 0                              | 0.02778    | 0            | 0.01137    | 0.01526      | 0.01326    | 0                                   | 0          | 0.01305  | 0.01397    | 0.00950  | 0.00829    |         |            |
| CLEC3B Putative uncharacterized protein DKFpZ688H12246 [tetraneurin(plasminogen binding protein)] | IP000792115      | 18 kDa           | 0                          | 3          | 0             | 0          | 0             | 0          | 0                              | 0.00484    | 0            | 0          | 0            | 0          | 0                                   | 0          | 0.00145  | 0.00251    | 0        | 0          |         |            |
| CLTC Isoform 1 of Clathrin heavy chain 1                                                          | IP000104667      | 192 kDa          | 4                          | 0          | 0             | 0          | 0             | 0          | 0.00585                        | 0          | 0.00711      | 0          | 0            | 0          | 0                                   | 0          | 0.00432  | 0.00379    | 0        | 0          |         |            |
| COL12A1 Isoform 1 of Collagen alpha-1(DI) chain precursor                                         | IP000129573      | 333 kDa          | 91                         | 0          | 160           | 0          | 0             | 37         | 0                              | 0.13057    | 0            | 0.22737    | 0            | 0.05248    | 0                                   | 0          | 0.10185  | 0.11423    | 0.17409  | 0.03030    |         |            |
| COL1A1 Collagen alpha-1(I) chain precursor                                                        | IP000297646      | 139 kDa          | 11                         | 0          | 13            | 9          | 3             | 13         | 0                              | 0.01609    | 0            | 0.01847    | 0.01144      | 0.00398    | 0.01844                             | 0          | 0.01152  | 0.01005    | 0.01129  | 0.00723    |         |            |
| COL1A2 Collagen alpha-2(I) chain precursor                                                        | IP000304962      | 129 kDa          | 0                          | 0          | 0             | 4          | 0             | 0          | 0                              | 0          | 0.00509      | 0          | 0            | 0          | 0                                   | 0          | 0        | 0.0170     | 0.00294  |            |         |            |
| COL4A1 Collagen alpha-1(V) chain precursor                                                        | IP000453460      | 151 kDa          | 0                          | 0          | 4             | 0          | 0             | 0          | 0                              | 0.00568    | 0            | 0.00426    | 0            | 0          | 0                                   | 0          | 0.00189  | 0.00328    | 0        | 0          |         |            |
| COL4A2 Collagen alpha-2(V) chain precursor                                                        | IP000365322      | 168 kDa          | 0                          | 0          | 3             | 0          | 0             | 0          | 0                              | 0          | 0.00426      | 0          | 0            | 0          | 0                                   | 0          | 0.00142  | 0.00246    | 0        | 0          |         |            |
| COL5A1 Collagen alpha-1(V) chain precursor                                                        | IP000844090      | 184 kDa          | 8                          | 0          | 8             | 0          | 0             | 0          | 0                              | 0.01170    | 0            | 0.01137    | 0            | 0          | 0                                   | 0          | 0.00769  | 0.00666    | 0        | 0          |         |            |
| COL5A2 Collagen alpha-2(V) chain precursor                                                        | IP000738099      | 145 kDa          | 0                          | 0          | 0             | 0          | 0             | 4          | 0                              | 0          | 0.00568      | 0          | 0            | 0.00567    | 0                                   | 0          | 0.00189  | 0.00328    |          |            |         |            |
| COL6A1 Collagen alpha-1(VI) chain precursor                                                       | IP000251336      | 109 kDa          | 36                         | 4          | 34            | 15         | 31            | 58         | 0                              | 0.06142    | 0.00209      | 0.04832    | 0.03414      | 0.04110    | 0.00217                             | 0.00374    | 0.02974  | 0.04917    | 0.02889  |            |         |            |
| COL6A2 Isoform 2C2 of Collagen alpha-2(VI) chain precursor                                        | IP000404840      | 109 kDa          | 22                         | 37         | 40            | 27         | 23            | 34         | 0                              | 0.03217    | 0.05354      | 0.05684    | 0.04343      | 0.03049    | 0.04823                             | 0.04752    | 0.01339  | 0.01768    | 0.00933  |            |         |            |
| COL6A3 alpha 3 type VI collagen isoform 1 precursor                                               | IP000022200      | 344 kDa          | 222                        | 256        | 356           | 199        | 193           | 316        | 0                              | 0.23464    | 0.37043      | 0.50589    | 0.25300      | 0.25587    | 0.44823                             | 0.40032    | 0.09425  | 0.31903    | 0.11189  |            |         |            |
| COX5A Cytochrome c oxidase subunit 5A, mitochondrial precursor                                    | IP00035086       | 17 kDa           | 2                          | 0          | 0             | 0          | 0             | 0          | 0                              | 0.00292    | 0            | 0          | 0            | 0          | 0                                   | 0          | 0.00097  | 0.00169    | 0        | 0          |         |            |
| CPNE1 Copine-1                                                                                    | IP00018452       | 59 kDa           | 0                          | 0          | 0             | 0          | 0             | 0          | 0                              | 0.00418    | 0            | 0.01279    | 0            | 0          | 0                                   | 0          | 0.00573  | 0.00650    | 0        | 0          |         |            |
| CPNE2 Copine II                                                                                   | IP000445310      | 64 kDa           | 2                          | 0          | 0             | 0          | 0             | 0          | 0                              | 0.00292    | 0            | 0          | 0            | 0          | 0                                   | 0          | 0.00097  | 0.00169    | 0        | 0          |         |            |
| CPZ Isoform 1 of Carboxypeptidase Z precursor                                                     | IP000396391      | 74 kDa           | 0                          | 8          | 0             | 0          | 0             | 0          | 0                              | 0.01158    | 0            | 0          | 0            | 0          | 0                                   | 0          | 0.00386  | 0.00668    | 0        | 0          |         |            |
| CS citrate synthase precursor, isoform B                                                          | IP000383539      | 47 kDa           | 0                          | 0          | 2             | 0          | 0             | 0          | 0                              | 0          | 0.00284      | 0          | 0            | 0          | 0                                   | 0          | 0.00095  | 0.00164    | 0        | 0          |         |            |
| CSNK2A1 Casein kinase II subunit alpha                                                            | IP000745507      | 45 kDa           | 4                          | 0          | 4             | 0          | 0             | 0          | 0                              | 0.00585    | 0            | 0.00568    | 0            | 0          | 0                                   | 0          | 0.00384  | 0.00333    | 0        | 0          |         |            |
| CRYBB1 Protein CRYBB1 precursor                                                                   | IP000299219      | 42 kDa           | 0                          | 39         | 3             | 0          | 0             | 0          | 0                              | 0.00643    | 0            | 0.00426    | 0            | 0          | 0                                   | 0          | 0.00243  | 0.00342    | 0        | 0          |         |            |
| DOST1 dolichyl-diphosphooligosaccharide-protein glycosyltransferase precursor                     | IP000297084      | 51 kDa           | 8                          | 0          | 5             | 2          | 2             | 0          | 0                              | 0.01170    | 0            | 0.00711    | 0.00254      | 0.00265    | 0                                   | 0          | 0.00627  | 0.00589    | 0.00173  | 0.00150    |         |            |
| DDX3X ATP-dependent RNA helicase DDX3X                                                            | IP000215637      | 73 kDa           | 4                          |            |               |            |               |            |                                |            |              |            |              |            |                                     |            |          |            |          |            |         |            |

| Identified Proteins (277)                                                                       | Accession Number | Molecular Weight | Unweighted spectrum counts |               |               | Unweighted spectrum counts |              |              | Normalised spectral counts (%) |               |               | Normalised spectral counts (%) |              |              | Mean normalised spectral counts (%) |           |          |          |
|-------------------------------------------------------------------------------------------------|------------------|------------------|----------------------------|---------------|---------------|----------------------------|--------------|--------------|--------------------------------|---------------|---------------|--------------------------------|--------------|--------------|-------------------------------------|-----------|----------|----------|
|                                                                                                 |                  |                  | LX-2 repeat 1              | LX-2 repeat 2 | LX-2 repeat 3 | HFF repeat 1               | HFF repeat 2 | HFF repeat 3 | LX-2 repeat 1                  | LX-2 repeat 2 | LX-2 repeat 3 | HFF repeat 1                   | HFF repeat 2 | HFF repeat 3 | LX-2 mean                           | LX-2 s.d. | HFF mean | HFF s.d. |
| HNHRNU Heterogeneous nuclear ribonucleoprotein U                                                | IP00044224       | 62 kDa           | 0                          | 0             | 0             | 8                          | 0            | 0            | 0                              | 0             | 0.01137       | 0                              | 0            | 0            | 0.00379                             | 0.00656   | 0        | 0        |
| HNHRN1 Heterogeneous nuclear ribonucleoprotein H                                                | IP00012881       | 49 kDa           | 0                          | 0             | 2             | 0                          | 0            | 0            | 0                              | 0             | 0.02384       | 0                              | 0            | 0            | 0.02095                             | 0.00164   | 0        | 0        |
| HNHRNP Isoform 1 of Heterogeneous nuclear ribonucleoprotein M                                   | IP00171903       | 78 kDa           | 3                          | 0             | 3             | 0                          | 0            | 0            | 0.00439                        | 0             | 0.00426       | 0                              | 0            | 0            | 0.00288                             | 0.00250   | 0        | 0        |
| HSP90A1 85 kDa protein                                                                          | IP00033475       | 85 kDa           | 4                          | 0             | 4             | 0                          | 0            | 0            | 0.00585                        | 0             | 0.01279       | 0                              | 0            | 0            | 0.00621                             | 0.00640   | 0        | 0        |
| HSPAB Isoform 1 of Heat shock cognate 71 kDa protein                                            | IP00003865       | 71 kDa           | 12                         | 0             | 10            | 0                          | 0            | 0            | 0.01755                        | 0             | 0.01421       | 0                              | 0            | 0            | 0.01059                             | 0.00932   | 0        | 0        |
| HSPB1 Heat shock protein beta-1                                                                 | IP00025512       | 23 kDa           | 0                          | 0             | 4             | 4                          | 5            | 0            | 0                              | 0             | 0.00528       | 0.00059                        | 0.00063      | 0.00189      | 0.00238                             | 0.00396   | 0.00347  |          |
| HSPD1 60 kDa heat shock protein, mitochondrial precursor                                        | IP00078414       | 61 kDa           | 0                          | 0             | 3             | 0                          | 0            | 0            | 0                              | 0             | 0.00426       | 0                              | 0            | 0            | 0.00142                             | 0.00246   | 0        | 0        |
| HSPG2 Basement membrane-specific heparan sulfate proteoglycan core protein precursor (perlecan) | IP00024284       | 469 kDa          | 66                         | 0             | 42            | 112                        | 104          | 0            | 0.09651                        | 0             | 0.06537       | 0.14239                        | 0.13788      | 0            | 0.05396                             | 0.04926   | 0.09342  | 0.08094  |
| HTRA1 Serine protease HTRA1 precursor                                                           | IP00003176       | 51 kDa           | 0                          | 8             | 0             | 0                          | 0            | 0            | 0                              | 0.01158       | 0             | 0                              | 0            | 0.00386      | 0.00648                             | 0         | 0        |          |
| HGF65 HGF-like growth factor-binding protein 5 precursor                                        | IP00029236       | 23 kDa           | 0                          | 2             | 0             | 0                          | 0            | 0            | 0                              | 0.00289       | 0             | 0.00167                        | 0            | 0            | 0.00296                             | 0.00147   | 0        | 0        |
| IMMT Isoform 1 of Mitochondrial inner membrane protein                                          | IP00009960       | 84 kDa           | 0                          | 0             | 17            | 0                          | 0            | 0            | 0                              | 0.01024       | 0.02416       | 0                              | 0            | 0.01146      | 0.01213                             | 0         | 0        |          |
| KRT1 Keratin, type II cytoskeletal 1                                                            | IP00022037       | 66 kDa           | 104                        | 219           | 64            | 77                         | 40           | 48           | 0.15208                        | 0.31690       | 0.09095       | 0.09789                        | 0.05303      | 0.06809      | 0.18664                             | 0.11687   | 0.07300  | 0.02283  |
| KRT10 Keratin, type I cytoskeletal 10                                                           | IP00009865       | 60 kDa           | 47                         | 93            | 16            | 11                         | 6            | 23           | 0.06873                        | 0.13457       | 0.02274       | 0.01398                        | 0.00795      | 0.01262      | 0.07535                             | 0.05621   | 0.01819  | 0.01286  |
| KRT14 Keratin, type I cytoskeletal 14                                                           | IP00038444       | 52 kDa           | 0                          | 27            | 0             | 0                          | 0            | 0            | 0                              | 0.03907       | 0             | 0                              | 0            | 0.01302      | 0.02256                             | 0         | 0        |          |
| KRT18 Keratin, type I cytoskeletal 18                                                           | IP00078437       | 48 kDa           | 10                         | 9             | 0             | 0                          | 0            | 0            | 0.01462                        | 0             | 0.01279       | 0                              | 0            | 0.00914      | 0.00797                             | 0         | 0        |          |
| KRT2 Keratin, type II cytoskeletal 2 epidermal                                                  | IP00021304       | 66 kDa           | 36                         | 75            | 20            | 19                         | 6            | 17           | 0.05264                        | 0.10853       | 0.02842       | 0.02416                        | 0.00795      | 0.02411      | 0.06320                             | 0.04108   | 0.01874  | 0.00934  |
| KRT5 Keratin, type II cytoskeletal 5                                                            | IP00009867       | 62 kDa           | 0                          | 20            | 0             | 0                          | 0            | 3            | 0                              | 0.02894       | 0             | 0                              | 0            | 0.00426      | 0.00965                             | 0.01671   | 0.01042  | 0.00246  |
| KRT6A Keratin, type II cytoskeletal 6A                                                          | IP00030725       | 60 kDa           | 0                          | 22            | 0             | 13                         | 0            | 0            | 0                              | 0.03183       | 0             | 0.01653                        | 0            | 0.01061      | 0.01838                             | 0.00551   | 0.00954  |          |
| KRT8 Keratin, type II cytoskeletal 8                                                            | IP00054668       | 54 kDa           | 12                         | 0             | 8             | 10                         | 18           | 0            | 0.01755                        | 0             | 0.01137       | 0                              | 0            | 0.00964      | 0.00890                             | 0         | 0        |          |
| KRT9 Keratin, type I cytoskeletal 9                                                             | IP00019359       | 62 kDa           | 48                         | 94            | 31            | 43                         | 35           | 54           | 0.07019                        | 0.13602       | 0.04405       | 0.05467                        | 0.04640      | 0.07660      | 0.08442                             | 0.04739   | 0.05922  | 0.01560  |
| LAMA4 Isoform 1 of Laminin subunit alpha-4 precursor                                            | IP00012848       | 203 kDa          | 0                          | 0             | 4             | 0                          | 0            | 0            | 0                              | 0.00568       | 0             | 0                              | 0            | 0.00189      | 0.00228                             | 0         | 0        |          |
| LAMA5 Laminin subunit alpha-5 precursor                                                         | IP00078465       | 400 kDa          | 28                         | 0             | 9             | 0                          | 0            | 0            | 0.04095                        | 0             | 0.01279       | 0                              | 0            | 0.01791      | 0.02095                             | 0         | 0        |          |
| LAMB1 Laminin subunit beta-1 precursor                                                          | IP00013976       | 198 kDa          | 13                         | 0             | 2             | 0                          | 0            | 0            | 0.01901                        | 0             | 0.00284       | 0                              | 0            | 0.00728      | 0.00225                             | 0         | 0        |          |
| LAMB2 Laminin subunit beta-2 precursor                                                          | IP00296922       | 196 kDa          | 2                          | 0             | 0             | 0                          | 0            | 0            | 0.00292                        | 0             | 0             | 0                              | 0            | 0.00097      | 0.00169                             | 0         | 0        |          |
| LAMC1 Laminin subunit gamma-1 precursor                                                         | IP00298281       | 178 kDa          | 4                          | 0             | 0             | 0                          | 0            | 0            | 0.00585                        | 0             | 0             | 0                              | 0            | 0.00195      | 0.00338                             | 0         | 0        |          |
| LGA15 Galectin-1                                                                                | IP00219219       | 15 kDa           | 0                          | 2             | 0             | 0                          | 0            | 0            | 0                              | 0.00289       | 0             | 0                              | 0            | 0.00096      | 0.00167                             | 0         | 0        |          |
| LMNA Isoform A of Lamin A/C                                                                     | IP00011405       | 74 kDa           | 0                          | 0             | 12            | 7                          | 0            | 0            | 0.00741                        | 0             | 0.01705       | 0                              | 0            | 0.00812      | 0.00856                             | 0.00299   | 0.00514  |          |
| LMNB1 Lamin B1                                                                                  | IP00217975       | 66 kDa           | 3                          | 0             | 0             | 0                          | 0            | 0            | 0.00439                        | 0             | 0             | 0                              | 0            | 0.00146      | 0.00253                             | 0         | 0        |          |
| LRRC17 Isoform 1 of Leucine-rich repeat-containing protein 17 precursor                         | IP00171160       | 52 kDa           | 19                         | 57            | 22            | 0                          | 0            | 0            | 0.02778                        | 0.08248       | 0.03126       | 0                              | 0            | 0.04718      | 0.03062                             | 0         | 0        |          |
| MTF2 Isoform 1 of Metalloproteinase precursor                                                   | IP00029275       | 80 kDa           | 0                          | 0             | 2             | 0                          | 0            | 0            | 0                              | 0.00284       | 0             | 0                              | 0            | 0.00095      | 0.00164                             | 0         | 0        |          |
| MST3 Microsomal glutathione S-transferase 3                                                     | IP00024166       | 17 kDa           | 0                          | 0             | 7             | 0                          | 0            | 0            | 0                              | 0.00956       | 0             | 0                              | 0            | 0.00332      | 0.00274                             | 0         | 0        |          |
| MME Nepsilin (CD10)                                                                             | IP00024703       | 86 kDa           | 0                          | 0             | 0             | 3                          | 0            | 0            | 0                              | 0             | 0             | 0.00398                        | 0            | 0            | 0.00133                             | 0.00230   |          |          |
| MOXD1 Isoform 1 of DBH-like monoxygenase protein 1 precursor                                    | IP00019596       | 70 kDa           | 0                          | 0             | 2             | 0                          | 0            | 0            | 0                              | 0.00254       | 0             | 0                              | 0            | 0            | 0.00085                             | 0.00147   |          |          |
| MPHOSPH1 Isoform 1 of M-phase phosphoprotein 1                                                  | IP00044751       | 211 kDa          | 0                          | 0             | 2             | 0                          | 0            | 0            | 0                              | 0.00284       | 0             | 0                              | 0            | 0.00095      | 0.00164                             | 0         | 0        |          |
| MRLC2 Myosin regulatory light chain 2                                                           | IP00014951       | 20 kDa           | 12                         | 0             | 15            | 24                         | 0            | 0            | 0.01795                        | 0             | 0.02842       | 0.01501                        | 0.02384      | 0.01532      | 0.01434                             | 0.01430   | 0.01362  |          |
| MSN Moesin                                                                                      | IP00019365       | 68 kDa           | 0                          | 0             | 3             | 3                          | 0            | 0            | 0                              | 0             | 0.00381       | 0.00398                        | 0            | 0            | 0.00143                             | 0.00225   |          |          |
| MVP Major vault protein                                                                         | IP00000105       | 99 kDa           | 17                         | 0             | 29            | 0                          | 0            | 0            | 0.02486                        | 0             | 0.04121       | 0                              | 0            | 0.02202      | 0.02075                             | 0         | 0        |          |
| MRXDC Matrix-remodelling-associated protein 5 precursor (adican)                                | IP00012347       | 312 kDa          | 0                          | 0             | 0             | 20                         | 18           | 8            | 0                              | 0             | 0.02543       | 0.02386                        | 0.01135      | 0            | 0.00221                             | 0.00772   |          |          |
| MYADM Myeloid-associated differentiation marker                                                 | IP00010285       | 52 kDa           | 0                          | 0             | 5             | 0                          | 0            | 0            | 0                              | 0.00704       | 0             | 0                              | 0            | 0.00237      | 0.00410                             |           |          |          |
| MYH10 Isoform 1 of Myosin-10                                                                    | IP00039736       | 229 kDa          | 37                         | 0             | 88            | 41                         | 43           | 0            | 0.05411                        | 0             | 0.12505       | 0.05213                        | 0.05701      | 0.05972      | 0.06271                             | 0.03638   | 0.03160  |          |
| MYH9 Myosin-9                                                                                   | IP00019502       | 227 kDa          | 231                        | 0             | 462           | 413                        | 323          | 0            | 0.37840                        | 0             | 0.65652       | 0.52507                        | 0.42822      | 0.31144      | 0.32831                             | 0.17796   | 0.27942  |          |
| MYL6 Isoform Non-muscle of Myosin light polypeptide 6                                           | IP00033518       | 17 kDa           | 15                         | 0             | 22            | 24                         | 33           | 0            | 0.02193                        | 0             | 0.03126       | 0.03051                        | 0.04375      | 0.01773      | 0.01605                             | 0.02475   | 0.02244  |          |
| MYL9 Myosin regulatory light chain 2, smooth muscle isoform                                     | IP00020278       | 20 kDa           | 0                          | 0             | 14            | 0                          | 0            | 0            | 0                              | 0.01989       | 0             | 0                              | 0            | 0.00663      | 0.01149                             | 0         | 0        |          |
| MYO4C Myosin 4c                                                                                 | IP00010418       | 118 kDa          | 7                          | 0             | 21            | 18                         | 4            | 0            | 0.01024                        | 0             | 0.02470       | 0.01989                        | 0            | 0.00454      | 0.00591                             | 0.01555   | 0.01387  |          |
| MYO1D Isoform 1 of Myosin 1d                                                                    | IP00029719       | 116 kDa          | 0                          | 0             | 0             | 2                          | 0            | 0            | 0                              | 0             | 0             | 0.00265                        | 0            | 0            | 0.00088                             | 0.00153   |          |          |
| NCL Isoform 1 of Nucleolin                                                                      | IP00064620       | 77 kDa           | 2                          | 0             | 0             | 0                          | 0            | 0            | 0.00292                        | 0             | 0             | 0                              | 0            | 0.00097      | 0.00169                             | 0         | 0        |          |
| ND1 Isoform 1 of Nidogen-1 precursor                                                            | IP00026944       | 136 kDa          | 20                         | 0             | 5             | 0                          | 0            | 0            | 0.02925                        | 0             | 0.00711       | 0                              | 0            | 0.01212      | 0.01525                             | 0         | 0        |          |
| NDNG2 Nidogen-2 precursor                                                                       | IP00012808       | 151 kDa          | 15                         | 3             | 4             | 4                          | 0            | 0            | 0.02193                        | 0             | 0.00426       | 0.00509                        | 0.01016      | 0.01163      | 0.00523                             | 0.00530   |          |          |
| NTSE 5'-nucleotidase precursor                                                                  | IP00009456       | 63 kDa           | 28                         | 0             | 13            | 18                         | 11           | 0            | 0.04095                        | 0             | 0.01847       | 0.02288                        | 0.01458      | 0.01981      | 0.02051                             | 0.01249   | 0.01159  |          |
| PABPC1 Isoform 1 of Polyadenylation-binding protein 1                                           | IP00008524       | 71 kDa           | 2                          | 0             | 0             | 0                          | 0            | 0            | 0.00292                        | 0             | 0             | 0                              | 0            | 0.00097      | 0.00169                             | 0         | 0        |          |
| PCBP2 poly(Cl)-binding protein 2 isoform A                                                      | IP00079637       | 39 kDa           | 2                          | 0             | 0             | 0                          | 0            | 0            | 0.00292                        | 0             | 0             | 0                              | 0            | 0.00097      | 0.00169                             | 0         | 0        |          |
| PDIK2 Protein disulfide-isomerase K2 precursor                                                  | IP00013352       | 57 kDa           | 8                          | 0             | 0             | 0                          | 0            | 0            | 0.00439                        | 0             | 0.00853       | 0                              | 0            | 0.00430      | 0.00426                             | 0         | 0        |          |
| PKF 6-phosphofruktokinase type C                                                                | IP00009790       | 86 kDa           | 3                          | 0             | 6             | 0                          | 0            | 0            | 0.00439                        | 0             | 0.01024       | 0                              | 0            | 0.00531      | 0.00213                             | 0         | 0        |          |
| PFN1 Profilin-1                                                                                 | IP00012691       | 15 kDa           | 7                          | 0             | 4             | 0                          | 0            | 0            | 0.01024                        | 0             | 0.00568       | 0                              | 0            | 0.00292      | 0.00171                             | 0         | 0        |          |
| PHB Prohibitin                                                                                  | IP00017334       | 30 kDa           | 2                          | 0             | 5             | 0                          | 0            | 0            | 0.00292                        | 0             | 0.00711       | 0                              | 0            | 0.00334      | 0.00257                             | 0         | 0        |          |
| PHB2 Prohibitin-2                                                                               | IP00027252       | 27 kDa           | 7                          | 0             | 11            | 0                          | 0            | 0            | 0.01024                        | 0             | 0.01563       | 0                              | 0            | 0.00862      | 0.00794                             | 0         | 0        |          |
| PHGDH D-3-phosphoglycerate dehydrogenase                                                        | IP00011200       | 57 kDa           | 0                          | 0             | 2             | 0                          | 0            | 0            | 0                              | 0.00284       | 0             | 0                              | 0            | 0.00095      | 0.00164                             | 0         | 0        |          |
| PKM2 Isoform M2 of Pyruvate kinase isoenzymes M1/M2                                             | IP000479186      | 98 kDa           | 2                          | 0             | 11            | 0                          | 0            | 0            | 0.00292                        | 0             | 0.01563       | 0                              | 0            | 0.00619      | 0.00831                             | 0         | 0        |          |
| POSTN Isoform 1 of Periostin precursor                                                          | IP00070960       | 53 kDa           | 2                          | 0             | 0             | 3                          | 0            | 0            | 0                              | 0             | 0.00381       | 0                              | 0            | 0            | 0.00127                             | 0.00220   |          |          |
| PRB peptidylarginine deaminase B precursor                                                      | IP000146304      | 24 kDa           | 0                          | 0             | 0             | 0                          | 0            | 0            | 0.00292                        | 0             | 0             | 0                              | 0            | 0.00097      | 0.00169                             | 0         | 0        |          |
| PRKX1 Peroxisome-1                                                                              | IP00000874       | 22 kDa           | 0                          | 0             | 2             | 0                          | 0            | 0            | 0                              | 0.00284       | 0             | 0                              | 0            | 0.00095      | 0.00164                             | 0         | 0        |          |
| PRKCDP protein kinase C, delta binding protein                                                  | IP00005134       | 28 kDa           | 0                          | 0             | 2             | 0                          | 0            | 0            | 0                              | 0             | 0.00254       | 0                              | 0            | 0            | 0.00085                             | 0.00147   |          |          |
| PRKDC Isoform 1 of DNA-dependent protein kinase catalytic subunit                               | IP00029637       | 469 kDa          | 16                         | 0             | 12            | 0                          | 0            | 0            | 0.02340                        | 0             | 0.01705       | 0                              | 0            | 0.01348      | 0.01210                             | 0         | 0        |          |
| PRPF1 Pre-mRNA-processing-splicing factor 8                                                     | IP00007978       | 274 kDa          | 4                          | 0             | 0             | 0                          | 0            | 0            | 0.00585                        | 0             | 0             | 0                              | 0            | 0.00195      | 0.00338                             | 0         | 0        |          |
| PRSS23 Serine protease 23 precursor                                                             | IP00020941       | 43 kDa           | 13                         | 31            | 7             | 0                          | 0            | 0            | 0.01901                        | 0.04486       | 0.00995       | 0                              | 0            | 0.02460      | 0.01811                             | 0         | 0        |          |
| PTFR Isoform 1 of Polymerase I and transcript release factor                                    | IP00176903       | 43 kDa           | 16                         | 0             | 7             | 0                          | 0            | 0            | 0.02340                        | 0             | 0.00995       | 0                              | 0            | 0.01111      | 0.01174                             | 0         | 0        |          |
| RAB1A Isoform 1 of Ras-related protein Rab-1A                                                   | IP00005719       | 23 kDa           | 8                          | 0             | 8             | 0                          | 0            | 0            | 0.01170                        | 0             | 0.01137       | 0                              | 0            | 0.00769      | 0.00666                             | 0         | 0        |          |
| RALY Isoform 1 of RNA-binding protein Raly                                                      | IP00014044       | 30 kDa           | 0                          | 0             | 2             | 0                          | 0            | 0            | 0                              | 0.00284       | 0             | 0                              | 0            | 0.00095      | 0.00164                             | 0         | 0        |          |
| RHOX Rho-related GTP-binding protein RhoX precursor                                             | IP000127434      | 22 kDa           | 0                          | 0             | 2             | 0                          |              |              |                                |               |               |                                |              |              |                                     |           |          |          |

| Identified Proteins (277)                                                            | Accession Number | Molecular Weight | Unweighted spectrum counts |               |               | Unweighted spectrum counts |              |              | Normalised spectral counts (%) |               |               | Normalised spectral counts (%) |              |              | Mean normalised spectral counts (%) |           |          |          |
|--------------------------------------------------------------------------------------|------------------|------------------|----------------------------|---------------|---------------|----------------------------|--------------|--------------|--------------------------------|---------------|---------------|--------------------------------|--------------|--------------|-------------------------------------|-----------|----------|----------|
|                                                                                      |                  |                  | LX-2 repeat 1              | LX-2 repeat 2 | LX-2 repeat 3 | HFF repeat 1               | HFF repeat 2 | HFF repeat 3 | LX-2 repeat 1                  | LX-2 repeat 2 | LX-2 repeat 3 | HFF repeat 1                   | HFF repeat 2 | HFF repeat 3 | LX-2 mean                           | LX-2 s.d. | HFF mean | HFF s.d. |
| RP52 40S ribosomal protein S2                                                        | IP00013485       | 31 kDa           | 12                         | 0             | 18            | 2                          | 0            | 0            | 0.01755                        | 0             | 0.02558       | 0.00254                        | 0            | 0            | 0.01438                             | 0.01308   | 0.00085  | 0.00147  |
| RP52 40S ribosomal protein S23                                                       | IP00218006       | 16 kDa           | 0                          | 9             | 9             | 0                          | 0            | 0            | 0.00302                        | 0.0129        | 0             | 0                              | 0            | 0.00866      | 0.00745                             | 0         | 0        |          |
| RP52A Isoform 1 of 40S ribosomal protein S24                                         | IP00009750       | 15 kDa           | 8                          | 13            | 0             | 0                          | 0            | 0            | 0.01170                        | 0.01881       | 0             | 0                              | 0            | 0.01017      | 0.00950                             | 0         | 0        |          |
| RP52B 40S ribosomal protein S25                                                      | IP00012750       | 14 kDa           | 8                          | 22            | 7             | 6                          | 6            | 0            | 0.01170                        | 0.03183       | 0.00995       | 0.00763                        | 0.00795      | 0.01783      | 0.02126                             | 0.00519   | 0.00450  |          |
| RP52B LOC728937;LOC644166 40S ribosomal protein S26                                  | IP00055650       | 13 kDa           | 0                          | 14            | 5             | 0                          | 0            | 0            | 0.00206                        | 0.00711       | 0             | 0                              | 0            | 0.00912      | 0.01028                             | 0         | 0        |          |
| RP527 40S ribosomal protein S27                                                      | IP00013971       | 9 kDa            | 8                          | 4             | 4             | 0                          | 0            | 0            | 0.00568                        | 0.01137       | 0             | 0                              | 0            | 0.01189      | 0.00332                             | 0         | 0        |          |
| RP527A;UBB;UBC ubiquitin and ribosomal protein S27A precursor                        | IP000179330      | 18 kDa           | 19                         | 0             | 36            | 37                         | 29           | 0            | 0.02778                        | 0             | 0.05116       | 0.04704                        | 0.03845      | 0.02631      | 0.02561                             | 0.02850   | 0.02505  |          |
| RP529 40S ribosomal protein S29                                                      | IP000182289      | 7 kDa            | 0                          | 9             | 0             | 0                          | 0            | 0            | 0.01302                        | 0             | 0             | 0                              | 0            | 0.00434      | 0.00752                             | 0         | 0        |          |
| RP3 40S ribosomal protein S3                                                         | IP00011253       | 27 kDa           | 26                         | 0             | 21            | 4                          | 3            | 0            | 0.03802                        | 0             | 0.02984       | 0.00509                        | 0.00398      | 0.02262      | 0.02001                             | 0.00302   | 0.00267  |          |
| RP5 40S ribosomal protein S5a                                                        | IP00019880       | 34 kDa           | 0                          | 2             | 12            | 0                          | 0            | 0            | 0.00292                        | 0             | 0.00666       | 0                              | 0            | 0.00666      | 0.00912                             | 0         | 0        |          |
| RP5A-X 40S ribosomal protein S4_X Isoform                                            | IP000217030      | 30 kDa           | 28                         | 42            | 33            | 6                          | 8            | 0            | 0.04095                        | 0.06077       | 0.04689       | 0.00763                        | 0.01061      | 0.04954      | 0.01018                             | 0.00608   | 0.00547  |          |
| RP55 40S ribosomal protein S5                                                        | IP00008433       | 23 kDa           | 0                          | 0             | 4             | 0                          | 0            | 0            | 0                              | 0.00568       | 0             | 0                              | 0            | 0.00189      | 0.00128                             | 0         | 0        |          |
| RP56 40S ribosomal protein S6                                                        | IP00021840       | 29 kDa           | 0                          | 0             | 6             | 0                          | 0            | 0            | 0                              | 0.00853       | 0             | 0                              | 0            | 0.00284      | 0.00492                             | 0         | 0        |          |
| RP57 40S ribosomal protein S7                                                        | IP00013415       | 22 kDa           | 8                          | 4             | 8             | 0                          | 0            | 0            | 0.01170                        | 0.00579       | 0.01137       | 0                              | 0            | 0.00962      | 0.00332                             | 0         | 0        |          |
| RP58 40S ribosomal protein S8                                                        | IP000216587      | 24 kDa           | 9                          | 0             | 9             | 0                          | 0            | 0            | 0.01316                        | 0             | 0.01279       | 0                              | 0            | 0.00865      | 0.00749                             | 0         | 0        |          |
| RP59 40S ribosomal protein S9                                                        | IP00021088       | 23 kDa           | 9                          | 4             | 26            | 3                          | 4            | 0            | 0.01316                        | 0.00579       | 0.03695       | 0.00381                        | 0.00530      | 0.01863      | 0.01628                             | 0.00304   | 0.00274  |          |
| RUVLB1 Isoform 1 of RuvB-like 1                                                      | IP00021187       | 50 kDa           | 0                          | 4             | 4             | 0                          | 0            | 0            | 0                              | 0.00568       | 0             | 0                              | 0            | 0.00189      | 0.00128                             | 0         | 0        |          |
| SAMM50 Sorting and assembly machinery component 50 homolog                           | IP00011713       | 52 kDa           | 7                          | 0             | 7             | 0                          | 0            | 0            | 0.01024                        | 0             | 0.00995       | 0                              | 0            | 0.00673      | 0.00583                             | 0         | 0        |          |
| SERPINE1 Plasminogen activator inhibitor 1 precursor                                 | IP000072159      | 45 kDa           | 2                          | 0             | 13            | 0                          | 0            | 0            | 0.00292                        | 0             | 0.01847       | 0                              | 0            | 0.00713      | 0.00993                             | 0         | 0        |          |
| SERPINF1 Pigment epithelium-derived factor precursor                                 | IP00006514       | 46 kDa           | 0                          | 0             | 0             | 0                          | 2            | 0            | 0                              | 0             | 0             | 0                              | 0.00284      | 0            | 0.00095                             | 0.00164   |          |          |
| SERPINF1 Serpin H1 precursor                                                         | IP00032140       | 46 kDa           | 2                          | 0             | 4             | 2                          | 0            | 0            | 0.00292                        | 0             | 0.00568       | 0.00254                        | 0            | 0.00287      | 0.00284                             | 0.00085   | 0.00147  |          |
| Serum albumin precursor                                                              | IP000108398      | 69 kDa           | 49                         | 228           | 49            | 16                         | 18           | 78           | 0.07165                        | 0.22992       | 0.06963       | 0.00394                        | 0.02386      | 0.11064      | 0.15707                             | 0.14970   | 0.05161  | 0.05115  |
| SFRS3 Splicing factor, arginine/serine-rich 3                                        | IP00010204       | 19 kDa           | 0                          | 4             | 0             | 0                          | 0            | 0            | 0                              | 0.00579       | 0             | 0                              | 0            | 0.00334      | 0                                   | 0         | 0        |          |
| SLC25A11 Mitochondrial 2-oxoglutarate/malate carrier protein                         | IP000219729      | 34 kDa           | 2                          | 0             | 0             | 0                          | 0            | 0            | 0.00292                        | 0             | 0             | 0                              | 0            | 0.00097      | 0.00169                             | 0         | 0        |          |
| SLC25A13 Mitochondrial aspartate-glutamate carrier protein                           | IP00007084       | 74 kDa           | 0                          | 0             | 2             | 0                          | 0            | 0            | 0                              | 0.00284       | 0             | 0                              | 0            | 0.00095      | 0.00164                             | 0         | 0        |          |
| SLC25A3 Isoform A of Phosphate carrier protein, mitochondrial precursor              | IP00022202       | 40 kDa           | 0                          | 0             | 16            | 0                          | 0            | 0            | 0                              | 0.02274       | 0             | 0                              | 0            | 0.00758      | 0.01313                             | 0         | 0        |          |
| SLC25A5 ADP/ATP translocase 2                                                        | IP00007388       | 33 kDa           | 28                         | 0             | 36            | 0                          | 0            | 0            | 0.04095                        | 0             | 0.05116       | 0                              | 0            | 0.00700      | 0.02707                             | 0         | 0        |          |
| SLC25A6 ADP/ATP translocase 3                                                        | IP000291467      | 33 kDa           | 0                          | 0             | 29            | 0                          | 0            | 0            | 0                              | 0.04121       | 0             | 0                              | 0            | 0.01374      | 0.02179                             | 0         | 0        |          |
| SNRPD3 Small nuclear ribonucleoprotein Sm D3                                         | IP00017964       | 14 kDa           | 3                          | 0             | 0             | 0                          | 0            | 0            | 0.00439                        | 0             | 0             | 0                              | 0            | 0.00146      | 0.00253                             | 0         | 0        |          |
| STAUI Staufen, RNA binding protein, homolog 1                                        | IP000641873      | 55 kDa           | 2                          | 0             | 0             | 0                          | 0            | 0            | 0.00292                        | 0             | 0             | 0                              | 0            | 0.00097      | 0.00169                             | 0         | 0        |          |
| STON Erythrocyte band 7 integral membrane protein                                    | IP00219682       | 32 kDa           | 18                         | 0             | 7             | 6                          | 10           | 0            | 0.02632                        | 0             | 0.00995       | 0.00763                        | 0.01326      | 0.01209      | 0.01129                             | 0.00696   | 0.00665  |          |
| STT3A Dolichyl-diphosphooligosaccharide--protein glycosyltransferase subunit STT3A   | IP00029492       | 80 kDa           | 0                          | 0             | 7             | 0                          | 0            | 0            | 0                              | 0.00995       | 0.01847       | 0                              | 0            | 0.00332      | 0.00574                             | 0         | 0        |          |
| SURF4 Isoform 1 of Surflet locus protein 4                                           | IP00005737       | 30 kDa           | 2                          | 0             | 13            | 0                          | 0            | 0            | 0.00292                        | 0             | 0.01847       | 0                              | 0            | 0.00713      | 0.00993                             | 0         | 0        |          |
| TFPI2 Tissue factor pathway inhibitor 2 precursor                                    | IP00009198       | 50 kDa           | 0                          | 24            | 5             | 0                          | 0            | 0            | 0                              | 0.03473       | 0.00711       | 0                              | 0            | 0.01394      | 0.01835                             | 0         | 0        |          |
| TGFBI Transforming growth factor-beta-induced protein ig-h3 precursor                | IP00016219       | 35 kDa           | 57                         | 140           | 58            | 19                         | 13           | 28           | 0.08335                        | 0.20258       | 0.08242       | 0.02416                        | 0.01723      | 0.03972      | 0.12278                             | 0.08611   | 0.02700  | 0.01551  |
| TGM2 Isoform 1 of Protein-glutamine gamma-glutamyltransferase 2 (transglutaminase 2) | IP000294578      | 77 kDa           | 14                         | 0             | 12            | 37                         | 16           | 0            | 0.02047                        | 0             | 0.01705       | 0.04704                        | 0.02121      | 0.01251      | 0.01097                             | 0.02275   | 0.02356  |          |
| THBS1 Thrombospondin-1 precursor                                                     | IP000296099      | 129 kDa          | 0                          | 0             | 0             | 0                          | 8            | 0            | 0                              | 0             | 0             | 0                              | 0.01135      | 0            | 0                                   | 0.00378   | 0.00655  |          |
| THSD4 Thrombospondin, type I, domain containing 4                                    | IP000794391      | 112 kDa          | 2                          | 0             | 0             | 0                          | 0            | 0            | 0.00292                        | 0             | 0             | 0                              | 0            | 0.00097      | 0.00169                             | 0         | 0        |          |
| THY1 Thy-1 membrane glycoprotein precursor                                           | IP00022992       | 18 kDa           | 0                          | 4             | 7             | 9                          | 0            | 0            | 0.01170                        | 0             | 0.00568       | 0.00890                        | 0.01193      | 0.00579      | 0.00585                             | 0.00694   | 0.00620  |          |
| TIMP3 Metalloproteinase inhibitor 3 precursor                                        | IP000218247      | 24 kDa           | 0                          | 5             | 0             | 0                          | 0            | 0            | 0                              | 0.00724       | 0             | 0                              | 0            | 0.00241      | 0.00418                             | 0         | 0        |          |
| TINAGL1 Isoform 1 of Tubulointerstitial nephritis antigen-like precursor             | IP00005563       | 52 kDa           | 6                          | 0             | 3             | 0                          | 0            | 0            | 0.00877                        | 0             | 0.00426       | 0                              | 0            | 0.00435      | 0.00439                             | 0         | 0        |          |
| TME10 Transmembrane emp24 domain-containing protein 10 precursor                     | IP00028055       | 25 kDa           | 0                          | 0             | 2             | 0                          | 0            | 0            | 0                              | 0.00284       | 0             | 0                              | 0            | 0.00095      | 0.00164                             | 0         | 0        |          |
| TMEM33 Transmembrane protein 33                                                      | IP000290984      | 28 kDa           | 0                          | 0             | 2             | 0                          | 0            | 0            | 0                              | 0.00284       | 0             | 0                              | 0            | 0.00095      | 0.00164                             | 0         | 0        |          |
| TMEM43 Transmembrane protein 43                                                      | IP00011290       | 45 kDa           | 15                         | 0             | 21            | 6                          | 4            | 0            | 0.02193                        | 0             | 0.02984       | 0.00763                        | 0.00530      | 0.01726      | 0.01546                             | 0.00431   | 0.00391  |          |
| TNC Isoform 1 of Tenascin precursor                                                  | IP00013008       | 241 kDa          | 76                         | 295           | 154           | 40                         | 30           | 51           | 0.11114                        | 0.42687       | 0.21884       | 0.05085                        | 0.03977      | 0.07234      | 0.25228                             | 0.16050   | 0.05432  | 0.01656  |
| TOMM40 Isoform 1 of Probable mitochondrial import receptor subunit TOM40 homolog     | IP00014053       | 38 kDa           | 5                          | 0             | 3             | 0                          | 0            | 0            | 0.00731                        | 0             | 0.00426       | 0                              | 0            | 0.00386      | 0.00367                             | 0         | 0        |          |
| TOP2A DNA topoisomerase 2                                                            | IP00178667       | 183 kDa          | 6                          | 0             | 5             | 0                          | 0            | 0            | 0.00877                        | 0             | 0.00711       | 0                              | 0            | 0.00529      | 0.00446                             | 0         | 0        |          |
| TPM4 Isoform 3 of Tropomyosin alpha-1 chain                                          | IP000216135      | 33 kDa           | 5                          | 0             | 4             | 7                          | 6            | 0            | 0.00731                        | 0             | 0.00568       | 0.00890                        | 0.00795      | 0.00433      | 0.00384                             | 0.00562   | 0.00489  |          |
| TRIP13 Isoform 1 of Thyroid receptor-interacting protein 13                          | IP00003505       | 49 kDa           | 0                          | 0             | 3             | 0                          | 0            | 0            | 0                              | 0.00426       | 0             | 0                              | 0            | 0.00142      | 0.00246                             | 0         | 0        |          |
| Trypsin - Sus scrofa (Pg)                                                            | MAN00000761      | 24 kDa           | 36                         | 95            | 45            | 55                         | 47           | 42           | 0.05264                        | 0.13747       | 0.06395       | 0.06992                        | 0.06231      | 0.05957      | 0.08469                             | 0.04606   | 0.06394  | 0.00536  |
| TUBA1B Tubulin alpha-1B chain                                                        | IP000397144      | 50 kDa           | 127                        | 0             | 160           | 22                         | 21           | 0            | 0.18572                        | 0             | 0.22737       | 0.02797                        | 0.02784      | 0.13769      | 0.12105                             | 0.01860   | 0.01611  |          |
| TUBB Tubulin beta chain                                                              | IP00011654       | 50 kDa           | 166                        | 5             | 202           | 47                         | 36           | 0            | 0.24275                        | 0.00724       | 0.28705       | 0.05975                        | 0.04773      | 0.17901      | 0.15040                             | 0.03583   | 0.03160  |          |
| TUBB2C Tubulin beta-2C chain                                                         | IP00007752       | 50 kDa           | 142                        | 0             | 176           | 0                          | 0            | 0            | 0.20765                        | 0             | 0.25010       | 0                              | 0            | 0.15258      | 0.13384                             | 0         | 0        |          |
| TUBB3 Tubulin beta-3 chain                                                           | IP00013683       | 50 kDa           | 101                        | 0             | 126           | 0                          | 0            | 0            | 0.14770                        | 0             | 0.17905       | 0                              | 0            | 0.10892      | 0.09562                             | 0         | 0        |          |
| TUBB6 46 kDa protein                                                                 | IP000641706      | 46 kDa           | 0                          | 0             | 95            | 0                          | 0            | 0            | 0                              | 0.13500       | 0             | 0                              | 0            | 0.04500      | 0.07794                             | 0         | 0        |          |
| TUBB6 Tubulin beta chain                                                             | IP00054779       | 50 kDa           | 0                          | 75            | 89            | 0                          | 0            | 0            | 0.10967                        | 0             | 0.12647       | 0                              | 0            | 0.07872      | 0.06869                             | 0         | 0        |          |
| UPF1 Isoform 1 of Regulator of nonsense transcripts 1                                | IP00034049       | 124 kDa          | 2                          | 0             | 2             | 0                          | 0            | 0            | 0.00292                        | 0             | 0.00284       | 0                              | 0            | 0.00192      | 0.00167                             | 0         | 0        |          |
| VDAC1 Voltage-dependent anion-selective channel protein 1                            | IP000216308      | 31 kDa           | 38                         | 0             | 27            | 7                          | 6            | 0            | 0.05557                        | 0             | 0.03837       | 0.00890                        | 0.00795      | 0.03131      | 0.02845                             | 0.00562   | 0.00489  |          |
| VDAC2 Voltage-dependent anion-selective channel protein 2                            | IP00024145       | 38 kDa           | 16                         | 0             | 15            | 7                          | 8            | 0            | 0.02340                        | 0             | 0.02132       | 0.00890                        | 0.01061      | 0.01490      | 0.01295                             | 0.00650   | 0.00570  |          |
| VDAC3 Isoform 1 of Voltage-dependent anion-selective channel protein 3               | IP00013804       | 31 kDa           | 0                          | 14            | 13            | 7                          | 6            | 0            | 0.02067                        | 0             | 0.01847       | 0.00795                        | 0            | 0.01298      | 0.01129                             | 0.00562   | 0.00489  |          |
| VIM Vimentin                                                                         | IP000418471      | 54 kDa           | 97                         | 0             | 124           | 75                         | 52           | 6            | 0.14185                        | 0             | 0.17621       | 0.09535                        | 0.06894      | 0.00851      | 0.10602                             | 0.09341   | 0.05760  | 0.04452  |
| VTN Vitronectin precursor                                                            | IP000298971      | 54 kDa           | 0                          | 0             | 0             | 6                          | 0            | 0            | 0                              | 0             | 0.00763       | 0                              | 0            | 0            | 0                                   | 0.00254   | 0.00440  |          |
| WNT5A Protein Wnt-5a precursor                                                       | IP00013178       | 41 kDa           | 0                          | 9             | 2             | 0                          | 0            | 0            | 0                              | 0.01302       | 0.00284       | 0                              | 0            | 0            | 0.00529                             | 0.00685   | 0        | 0        |
| XKCC5 ATP-dependent DNA helicase 2 subunit 2                                         | IP000220834      | 83 kDa           |                            |               |               |                            |              |              |                                |               |               |                                |              |              |                                     |           |          |          |



**Table S5.** Hierarchical clustering analysis of proteins identified in LX-2 and HFF CDM purifications (full datasets).

<sup>a</sup> ECM and secreted proteins are highlighted in grey

| Gene symbol and protein name <sup>a</sup>                                                                                               | Mean normalised spectral count (%) |        | Cluster       |
|-----------------------------------------------------------------------------------------------------------------------------------------|------------------------------------|--------|---------------|
|                                                                                                                                         | LX-2                               | HFF    |               |
| HBA2;HBA1 Hemoglobin subunit alpha                                                                                                      | 0.0139                             | 0.0356 | HFF enriched  |
| EGF2 fibroblast growth factor 2                                                                                                         | 0.0010                             | 0.0025 | HFF enriched  |
| H2AFY H2A histone family, member Y isoform 2                                                                                            | 0.0053                             | 0.0126 | HFF enriched  |
| HIST1H4F;HIST2H4B;HIST1H4L;HIST1H4I;HIST1H4A;HIST1H4J;HIST1H4K;HIST1H4D;HIST1H4E;HIST1H4C;HIST4H4;HIST1H4H;HIST1H4B;HIST2H4A Histone H4 | 0.0824                             | 0.1991 | HFF enriched  |
| HSPB1 Heat shock protein beta-1                                                                                                         | 0.0019                             | 0.0039 | HFF enriched  |
| CD44 antigen precursor                                                                                                                  | 0.0020                             | 0.0039 | HFF enriched  |
| FN1 fibronectin 1 isoform 4 preproprotein                                                                                               | 0.1467                             | 0.5115 | HFF enriched  |
| FBLN2 Fibulin-2 precursor                                                                                                               | 0.0068                             | 0.0302 | HFF enriched  |
| MYO1C Myosin-1c                                                                                                                         | 0.0034                             | 0.0155 | HFF enriched  |
| PRKCDBP protein kinase C, delta binding protein                                                                                         | 0                                  | 0.0008 | HFF enriched  |
| SERPINF1 Pigment epithelium-derived factor precursor                                                                                    | 0                                  | 0.0009 | HFF enriched  |
| POSTN Isoform 1 of Periostin precursor                                                                                                  | 0                                  | 0.0013 | HFF enriched  |
| EFGMP2 EGF-containing fibulin-like extracellular matrix protein 2 precursor (fibulin 4)                                                 | 0                                  | 0.0026 | HFF enriched  |
| ANPEP Aminopeptidase N (CD13)                                                                                                           | 0                                  | 0.0252 | HFF enriched  |
| ATP5O ATP synthase subunit O, mitochondrial precursor                                                                                   | 0                                  | 0.0008 | HFF enriched  |
| COL1A2 Collagen alpha-2(I) chain precursor                                                                                              | 0                                  | 0.0017 | HFF enriched  |
| DPT Dermatopontin precursor                                                                                                             | 0                                  | 0.0014 | HFF enriched  |
| FBLN1 Isoform B of Fibulin-1 precursor                                                                                                  | 0                                  | 0.0073 | HFF enriched  |
| VTN Vitronectin precursor                                                                                                               | 0                                  | 0.0025 | HFF enriched  |
| MOXD1 Isoform 1 of DBH-like monooxygenase protein 1 precursor                                                                           | 0                                  | 0.0008 | HFF enriched  |
| EMILIN1 EMILIN-1 precursor                                                                                                              | 0                                  | 0.0384 | HFF enriched  |
| NMEF Nephrysin (CD10)                                                                                                                   | 0                                  | 0.0013 | HFF enriched  |
| COL5A2 Collagen alpha-2(V) chain precursor                                                                                              | 0                                  | 0.0019 | HFF enriched  |
| MYO1D Isoform 1 of Myosin-1d                                                                                                            | 0                                  | 0.0009 | HFF enriched  |
| MSN Moesin                                                                                                                              | 0                                  | 0.0026 | HFF enriched  |
| MXRA5 Matrix-remodeling-associated protein 5 precursor (adican)                                                                         | 0                                  | 0.0202 | HFF enriched  |
| THBS1 Thrombospondin-1 precursor                                                                                                        | 0                                  | 0.0038 | HFF enriched  |
| ADAMTS1 ADAMTS-1 precursor                                                                                                              | 0                                  | 0.0009 | HFF enriched  |
| HIST1H3F;HIST1H3E;HIST1H3J;HIST1H3I;HIST1H3B;HIST1H3A;HIST1H3I;HIST1H3C;HIST1H3G;HIST1H3D;HIST1H2BN Histone H3.1                        | 0.0086                             | 0.0725 | HFF enriched  |
| SLC25A5 ADP/ATP translocase 2                                                                                                           | 0.0307                             | 0      | LX-2 enriched |
| SFRS3 Splicing factor, arginine/serine-rich 3                                                                                           | 0.0019                             | 0      | LX-2 enriched |
| PKM2 Isoform M2 of Pyruvate kinase isozymes M1/M2                                                                                       | 0.0062                             | 0      | LX-2 enriched |
| BANF1 Barrier-to-autointegration factor                                                                                                 | 0.0073                             | 0      | LX-2 enriched |
| RPL35 60S ribosomal protein L35                                                                                                         | 0.0077                             | 0      | LX-2 enriched |
| PHB Prohibitin                                                                                                                          | 0.0033                             | 0      | LX-2 enriched |
| PHB2 Prohibitin-2                                                                                                                       | 0.0086                             | 0      | LX-2 enriched |
| C4A Complement C4-A precursor                                                                                                           | 0.0019                             | 0      | LX-2 enriched |
| RPS3A 40S ribosomal protein S3a                                                                                                         | 0.0067                             | 0      | LX-2 enriched |
| HTRA1 Serine protease HTRA1 precursor                                                                                                   | 0.0039                             | 0      | LX-2 enriched |
| SLC25A6 ADP/ATP translocase 3                                                                                                           | 0.0137                             | 0      | LX-2 enriched |
| RPS11 40S ribosomal protein S11                                                                                                         | 0.0067                             | 0      | LX-2 enriched |
| CPZ Isoform 1 of Carboxypeptidase Z precursor                                                                                           | 0.0039                             | 0      | LX-2 enriched |
| RPS24 Isoform 1 of 40S ribosomal protein S24                                                                                            | 0.0102                             | 0      | LX-2 enriched |
| LRRC17 Isoform 1 of Leucine-rich repeat-containing protein 17 precursor                                                                 | 0.0472                             | 0      | LX-2 enriched |
| LGALS1 Galectin-1                                                                                                                       | 0.0010                             | 0      | LX-2 enriched |
| LAMB1 Laminin subunit beta-1 precursor                                                                                                  | 0.0073                             | 0      | LX-2 enriched |
| ANXA5 Annexin A5                                                                                                                        | 0.0039                             | 0      | LX-2 enriched |
| TUBB3 Tubulin beta-3 chain                                                                                                              | 0.1089                             | 0      | LX-2 enriched |
| ARPC3 Actin-related protein 2/3 complex subunit 3                                                                                       | 0.0058                             | 0      | LX-2 enriched |
| RPL26L1 60S ribosomal protein L26-like 1                                                                                                | 0.0010                             | 0      | LX-2 enriched |
| IGFBP5 Insulin-like growth factor-binding protein 5 precursor                                                                           | 0.0010                             | 0      | LX-2 enriched |
| RPL21;LOC729402;LOC731567 60S ribosomal protein L21                                                                                     | 0.0062                             | 0      | LX-2 enriched |
| RPS26;LOC728937;LOC644166 40S ribosomal protein S26                                                                                     | 0.0091                             | 0      | LX-2 enriched |
| NID1 Isoform 1 of Nidogen-1 precursor                                                                                                   | 0.0124                             | 0      | LX-2 enriched |
| EEF2 Elongation factor 2                                                                                                                | 0.0015                             | 0      | LX-2 enriched |
| LMNB1 Lamin-B1                                                                                                                          | 0.0015                             | 0      | LX-2 enriched |
| NCL Isoform 1 of Nucleolin                                                                                                              | 0.0010                             | 0      | LX-2 enriched |
| GNB2 Guanine nucleotide-binding protein G(I)/G(S)/G(T) subunit beta-2                                                                   | 0.0020                             | 0      | LX-2 enriched |
| RPL3 60S ribosomal protein L3                                                                                                           | 0.0019                             | 0      | LX-2 enriched |
| PABPC1 Isoform 1 of Polyadenylate-binding protein 1                                                                                     | 0.0010                             | 0      | LX-2 enriched |
| EIF3A Eukaryotic translation initiation factor 3 subunit 10                                                                             | 0.0010                             | 0      | LX-2 enriched |
| RPL13A 60S ribosomal protein L13a                                                                                                       | 0.0015                             | 0      | LX-2 enriched |
| ANXA1 Annexin A1                                                                                                                        | 0.0010                             | 0      | LX-2 enriched |
| PCBP2 poly(rC)-binding protein 2 isoform a                                                                                              | 0.0010                             | 0      | LX-2 enriched |
| LAMC1 Laminin subunit gamma-1 precursor                                                                                                 | 0.0020                             | 0      | LX-2 enriched |
| BCAM Lutheran blood group glycoprotein precursor (CD239 - laminin receptor)                                                             | 0.0010                             | 0      | LX-2 enriched |
| ATAD3A ATPase family, AAA domain containing 3A                                                                                          | 0.0024                             | 0      | LX-2 enriched |
| TUBB6 46 kDa protein                                                                                                                    | 0.0450                             | 0      | LX-2 enriched |
| RAB1A Isoform 1 of Ras-related protein Rab-1A                                                                                           | 0.0077                             | 0      | LX-2 enriched |
| RPS7 40S ribosomal protein S7                                                                                                           | 0.0096                             | 0      | LX-2 enriched |
| FLNA Filamin-A                                                                                                                          | 0.0115                             | 0      | LX-2 enriched |
| KRT18 Keratin, type I cytoskeletal 18                                                                                                   | 0.0091                             | 0      | LX-2 enriched |
| RPL31 60S ribosomal protein L31                                                                                                         | 0.0077                             | 0      | LX-2 enriched |
| WNT5A Protein Wnt-5a precursor                                                                                                          | 0.0053                             | 0      | LX-2 enriched |
| RPL15 60S ribosomal protein L15                                                                                                         | 0.0115                             | 0      | LX-2 enriched |
| CLTC Isoform 1 of Clathrin heavy chain 1                                                                                                | 0.0043                             | 0      | LX-2 enriched |
| AGRN Agrin precursor                                                                                                                    | 0.0140                             | 0      | LX-2 enriched |
| CSNK2A1 Casein kinase II subunit alpha                                                                                                  | 0.0038                             | 0      | LX-2 enriched |
| GNB1 Guanine nucleotide-binding protein G(I)/G(S)/G(T) subunit beta-1                                                                   | 0.0038                             | 0      | LX-2 enriched |
| EIF4A3 Eukaryotic initiation factor 4A-III                                                                                              | 0.0077                             | 0      | LX-2 enriched |
| LAMB2 Laminin subunit beta-2 precursor                                                                                                  | 0.0010                             | 0      | LX-2 enriched |
| RPL10 60S ribosomal protein L10                                                                                                         | 0.0115                             | 0      | LX-2 enriched |
| EFTUD2 116 kDa U5 small nuclear ribonucleoprotein component                                                                             | 0.0043                             | 0      | LX-2 enriched |
| RPL17 60S ribosomal protein L17                                                                                                         | 0.0134                             | 0      | LX-2 enriched |
| COX5A Cytochrome c oxidase subunit 5A, mitochondrial precursor                                                                          | 0.0010                             | 0      | LX-2 enriched |
| SNRNP3 Small nuclear ribonucleoprotein Sm D3                                                                                            | 0.0015                             | 0      | LX-2 enriched |
| HNRNCP Isoform C1 of Heterogeneous nuclear ribonucleoproteins C1/C2                                                                     | 0.0096                             | 0      | LX-2 enriched |
| PDIA3 Protein disulfide-isomerase A3 precursor                                                                                          | 0.0039                             | 0      | LX-2 enriched |
| IMMT Isoform 1 of Mitochondrial inner membrane protein                                                                                  | 0.0115                             | 0      | LX-2 enriched |
| CAV1 Caveolin                                                                                                                           | 0.0125                             | 0      | LX-2 enriched |
| COL5A1 Collagen alpha-1(V) chain precursor                                                                                              | 0.0077                             | 0      | LX-2 enriched |
| PRPF8 Pre-mRNA-processing-splicing factor 8                                                                                             | 0.0020                             | 0      | LX-2 enriched |
| CPNE2 Copine II                                                                                                                         | 0.0010                             | 0      | LX-2 enriched |
| MYADM Myeloid-associated differentiation marker                                                                                         | 0.0024                             | 0      | LX-2 enriched |
| STAU1 Staufen, RNA binding protein, homolog 1                                                                                           | 0.0010                             | 0      | LX-2 enriched |
| ITIH5D4 Itih5 domain containing 4                                                                                                       | 0.0010                             | 0      | LX-2 enriched |
| UPF1 Isoform 1 of Regulator of nonsense transcripts 1                                                                                   | 0.0019                             | 0      | LX-2 enriched |
| CFL1 Cofilin-1                                                                                                                          | 0.0024                             | 0      | LX-2 enriched |
| BST1 ADP-ribosyl cyclase 2 precursor                                                                                                    | 0.0015                             | 0      | LX-2 enriched |
| PPIB peptidylprolyl isomerase B precursor                                                                                               | 0.0010                             | 0      | LX-2 enriched |
| SLC25A11 Mitochondrial 2-oxoglutarate/malate carrier protein                                                                            | 0.0010                             | 0      | LX-2 enriched |
| GANAB Isoform 1 of Neutral alpha-glucosidase AB precursor                                                                               | 0.0010                             | 0      | LX-2 enriched |
| HSPAB Isoform 1 of Heat shock cognate 71 kDa protein                                                                                    | 0.0106                             | 0      | LX-2 enriched |
| LAMM5 Laminin subunit alpha-5 precursor                                                                                                 | 0.0179                             | 0      | LX-2 enriched |
| PRKDC Isoform 1 of DNA-dependent protein kinase catalytic subunit                                                                       | 0.0135                             | 0      | LX-2 enriched |
| SAMM50 Sorting and assembly machinery component 50 homolog                                                                              | 0.0067                             | 0      | LX-2 enriched |
| ATPSJ2 Isoform 1 of ATP synthase f chain, mitochondrial                                                                                 | 0.0014                             | 0      | LX-2 enriched |
| HBB Hemoglobin subunit beta                                                                                                             | 0.0071                             | 0      | LX-2 enriched |
| GSN Isoform 1 of Gelsolin precursor                                                                                                     | 0.0033                             | 0      | LX-2 enriched |
| HADHA Trifunctional enzyme subunit alpha, mitochondrial precursor                                                                       | 0.0063                             | 0      | LX-2 enriched |
| TINAGL1 Isoform 1 of Tubulointerstitial nephritis antigen-like precursor                                                                | 0.0043                             | 0      | LX-2 enriched |
| RPS6 40S ribosomal protein S6                                                                                                           | 0.0029                             | 0      | LX-2 enriched |
| RPL14 60S ribosomal protein L14                                                                                                         | 0.0097                             | 0      | LX-2 enriched |
| CAPZA1 F-actin-capping protein subunit alpha-1                                                                                          | 0.0015                             | 0      | LX-2 enriched |
| TOMM40 Isoform 1 of Probable mitochondrial import receptor subunit TOM40 homolog                                                        | 0.0039                             | 0      | LX-2 enriched |
| RPL12 60S ribosomal protein L12                                                                                                         | 0.0048                             | 0      | LX-2 enriched |
| EDIL3 Isoform 1 of EGF-like repeat and discoidin I-like domain-containing protein 3 precursor (DEL1)                                    | 0.0039                             | 0      | LX-2 enriched |
| MGST3 Microsomal glutathione S-transferase 3                                                                                            | 0.0033                             | 0      | LX-2 enriched |
| COL4A2 Collagen alpha-2(IV) chain precursor                                                                                             | 0.0014                             | 0      | LX-2 enriched |
| STT3A Dolichyl-diphosphooligosaccharide-protein glycosyltransferase subunit STT3A                                                       | 0.0033                             | 0      | LX-2 enriched |
| PTRF Isoform 1 of Polymerase I and transcript release factor                                                                            | 0.0111                             | 0      | LX-2 enriched |

| Gene symbol and protein name <sup>a</sup>                                                                | Mean normalised spectral count (%) |               | Cluster                    |
|----------------------------------------------------------------------------------------------------------|------------------------------------|---------------|----------------------------|
|                                                                                                          | LX-2                               | HFF           |                            |
| MYL9 Myosin regulatory light chain 2, smooth muscle isoform                                              | 0.0066                             | 0             | LX-2 enriched              |
| TIMP3 Metalloproteinase inhibitor 3 precursor                                                            | 0.0024                             | 0             | LX-2 enriched              |
| HSPD1 60 kDa heat shock protein, mitochondrial precursor                                                 | 0.0014                             | 0             | LX-2 enriched              |
| <b>TFP2 Tissue factor pathway inhibitor 2 precursor</b>                                                  | <b>0.0159</b>                      | <b>0</b>      | <b>LX-2 enriched</b>       |
| ARF1 ADP-ribosylation factor 1                                                                           | 0.0033                             | 0             | LX-2 enriched              |
| GREM1 Isoform 1 of Gremlin-1 precursor                                                                   | 0.0024                             | 0             | LX-2 enriched              |
| RPS15 40S ribosomal protein S15                                                                          | 0.0048                             | 0             | LX-2 enriched              |
| TRIP13 Isoform 1 of Thyroid receptor-interacting protein 13                                              | 0.0014                             | 0             | LX-2 enriched              |
| TMEM33 Transmembrane protein 33                                                                          | 0.0009                             | 0             | LX-2 enriched              |
| XRCC5 ATP-dependent DNA helicase 2 subunit 2                                                             | 0.0009                             | 0             | LX-2 enriched              |
| <b>LAMA4 Isoform 1 of Laminin subunit alpha-4 precursor</b>                                              | <b>0.0019</b>                      | <b>0</b>      | <b>LX-2 enriched</b>       |
| DDX5 Probable ATP-dependent RNA helicase DDX5                                                            | 0.0019                             | 0             | LX-2 enriched              |
| RUVBL1 Isoform 1 of RuvB-like 1                                                                          | 0.0019                             | 0             | LX-2 enriched              |
| RPL18A 60S ribosomal protein L18a                                                                        | 0.0009                             | 0             | LX-2 enriched              |
| RPS15A 40S ribosomal protein S15a                                                                        | 0.0019                             | 0             | LX-2 enriched              |
| <b>COL4A1 Collagen alpha-1(IV) chain precursor</b>                                                       | <b>0.0019</b>                      | <b>0</b>      | <b>LX-2 enriched</b>       |
| RALY Isoform 1 of RNA-binding protein Raly                                                               | 0.0009                             | 0             | LX-2 enriched              |
| RPS27 40S ribosomal protein S27                                                                          | 0.0019                             | 0             | LX-2 enriched              |
| CHCHD3 Coiled-coil-helix-coiled-coil-helix domain-containing protein 3                                   | 0.0019                             | 0             | LX-2 enriched              |
| RPS5 40S ribosomal protein S5                                                                            | 0.0019                             | 0             | LX-2 enriched              |
| PHGDH D-3-phosphoglycerate dehydrogenase                                                                 | 0.0009                             | 0             | LX-2 enriched              |
| BCAP31 B-cell receptor-associated protein 31                                                             | 0.0009                             | 0             | LX-2 enriched              |
| SURF4 Isoform 1 of Surf1 locus protein 4                                                                 | 0.0071                             | 0             | LX-2 enriched              |
| CS citrate synthase precursor, isoform b                                                                 | 0.0009                             | 0             | LX-2 enriched              |
| HSP90AB1 85 kDa protein                                                                                  | 0.0062                             | 0             | LX-2 enriched              |
| MF12 Isoform 1 of Melanotransferrin precursor                                                            | 0.0009                             | 0             | LX-2 enriched              |
| RPS8 40S ribosomal protein S8                                                                            | 0.0087                             | 0             | LX-2 enriched              |
| <b>PRSS23 Serine protease 23 precursor</b>                                                               | <b>0.0246</b>                      | <b>0</b>      | <b>LX-2 enriched</b>       |
| ABCD3 ATP-binding cassette sub-family D member 3                                                         | 0.0068                             | 0             | LX-2 enriched              |
| HADHB Trifunctional enzyme beta subunit, mitochondrial precursor                                         | 0.0009                             | 0             | LX-2 enriched              |
| SLC25A3 Isoform A of Phosphate carrier protein, mitochondrial precursor                                  | 0.0076                             | 0             | LX-2 enriched              |
| HNRPM Isoform 1 of Heterogeneous nuclear ribonucleoprotein M                                             | 0.0029                             | 0             | LX-2 enriched              |
| YWHAZ 14-3-3 protein zeta/delta                                                                          | 0.0053                             | 0             | LX-2 enriched              |
| PFKP 6-phosphofructokinase type C                                                                        | 0.0043                             | 0             | LX-2 enriched              |
| SLC25A13 Mitochondrial aspartate-glutamate carrier protein                                               | 0.0009                             | 0             | LX-2 enriched              |
| PRDX1 Peroxiredoxin-1                                                                                    | 0.0009                             | 0             | LX-2 enriched              |
| DDX3X ATP-dependent RNA helicase DDX3X                                                                   | 0.0048                             | 0             | LX-2 enriched              |
| RHOc Rho-related GTP-binding protein RhoC precursor                                                      | 0.0009                             | 0             | LX-2 enriched              |
| <b>ENTPD4L/LOXL2 Lysyl oxidase homolog 2 precursor</b>                                                   | <b>0.0009</b>                      | <b>0</b>      | <b>LX-2 enriched</b>       |
| TMED10 Transmembrane emp24 domain-containing protein 10 precursor                                        | 0.0009                             | 0             | LX-2 enriched              |
| RPS29 40S ribosomal protein S29                                                                          | 0.0043                             | 0             | LX-2 enriched              |
| MVP Major vault protein                                                                                  | 0.0220                             | 0             | LX-2 enriched              |
| RPL9 60S ribosomal protein L9                                                                            | 0.0019                             | 0             | LX-2 enriched              |
| RPL30 60S ribosomal protein L30                                                                          | 0.0024                             | 0             | LX-2 enriched              |
| ATP5C1 Isoform Liver of ATP synthase gamma chain, mitochondrial precursor                                | 0.0019                             | 0             | LX-2 enriched              |
| HNRPH1 Heterogeneous nuclear ribonucleoprotein H                                                         | 0.0009                             | 0             | LX-2 enriched              |
| RPS17 40S ribosomal protein S17                                                                          | 0.0019                             | 0             | LX-2 enriched              |
| HNRNP1 Heterogeneous nuclear ribonucleoprotein U                                                         | 0.0038                             | 0             | LX-2 enriched              |
| H2BFS Histone H2B                                                                                        | 0.0009                             | 0             | LX-2 enriched              |
| <b>SERPINE1 Plasminogen activator inhibitor 1 precursor</b>                                              | <b>0.0071</b>                      | <b>0</b>      | <b>LX-2 enriched</b>       |
| MPHOSPH1 Isoform 1 of M-phase phosphoprotein 1                                                           | 0.0009                             | 0             | LX-2 enriched              |
| RPS23 40S ribosomal protein S23                                                                          | 0.0086                             | 0             | LX-2 enriched              |
| TOP2A DNA topoisomerase 2                                                                                | 0.0053                             | 0             | LX-2 enriched              |
| ERLIN1 ER lipid raft associated 1                                                                        | 0.0049                             | 0             | LX-2 enriched              |
| TUBB6 TUBB6 protein                                                                                      | 0.0787                             | 0             | LX-2 enriched              |
| ACTR2 Actin-related protein 2                                                                            | 0.0058                             | 0             | LX-2 enriched              |
| <b>EGFL7 EGF-like domain-containing protein 7 precursor (VE-statin)</b>                                  | <b>0.0048</b>                      | <b>0</b>      | <b>LX-2 enriched</b>       |
| PFN1 Profilin-1                                                                                          | 0.0053                             | 0             | LX-2 enriched              |
| CPNE1 Copine-1                                                                                           | 0.0057                             | 0             | LX-2 enriched              |
| YWHAE 14-3-3 protein epsilon                                                                             | 0.0058                             | 0             | LX-2 enriched              |
| RPL38 60S ribosomal protein L38                                                                          | 0.0029                             | 0             | LX-2 enriched              |
| <b>OLEC3B Putative uncharacterized protein DKFZp686H17246 [tetranectin(plasminogen binding protein)]</b> | <b>0.0014</b>                      | <b>0</b>      | <b>LX-2 enriched</b>       |
| RPL32 60S ribosomal protein L32                                                                          | 0.0014                             | 0             | LX-2 enriched              |
| EIFA1 Eukaryotic initiation factor 4A-1                                                                  | 0.0110                             | 0             | LX-2 enriched              |
| RPL23A/hCG_16001 60S ribosomal protein L23a                                                              | 0.0111                             | 0             | LX-2 enriched              |
| <b>CYR61 Protein.CYR61 precursor</b>                                                                     | <b>0.0202</b>                      | <b>0</b>      | <b>LX-2 enriched</b>       |
| KRT8 Keratin, type II cytoskeletal 8                                                                     | 0.0096                             | 0             | LX-2 enriched              |
| TUBB2C Tubulin beta-2C chain                                                                             | 0.1526                             | 0             | LX-2 enriched              |
| KRT14 Keratin, type I cytoskeletal 14                                                                    | 0.0130                             | 0             | LX-2 enriched              |
| <b>FBN1 312 kDa protein (fibrillin 1)</b>                                                                | <b>0.2693</b>                      | <b>0.0133</b> | <b>LX-2 enriched</b>       |
| RPS2 40S ribosomal protein S2                                                                            | 0.0144                             | 0.0008        | LX-2 enriched              |
| GAPDH Glycerinaldehyde-3-phosphate dehydrogenase                                                         | 0.0072                             | 0.0013        | LX-2 enriched              |
| VDAC1 Voltage-dependent anion-selective channel protein 1                                                | 0.0313                             | 0.0056        | LX-2 enriched              |
| RPL4 60S ribosomal protein L4                                                                            | 0.0072                             | 0.0013        | LX-2 enriched              |
| RPS9 40S ribosomal protein S9                                                                            | 0.0186                             | 0.0030        | LX-2 enriched              |
| GNAI2 Isoform 1 of Guanine nucleotide-binding protein G(i), alpha-2 subunit                              | 0.0087                             | 0.0013        | LX-2 enriched              |
| KRT5 Keratin, type II cytoskeletal 5                                                                     | 0.0096                             | 0.0014        | LX-2 enriched              |
| FLOT2 flotillin 2                                                                                        | 0.0265                             | 0.0039        | LX-2 enriched              |
| <b>COL12A1 Isoform 1 of Collagen alpha-1(XII) chain precursor</b>                                        | <b>0.1201</b>                      | <b>0.0175</b> | <b>LX-2 enriched</b>       |
| EEF1A1 Elongation factor 1-alpha 1                                                                       | 0.0340                             | 0.0040        | LX-2 enriched              |
| RPL23 60S ribosomal protein L23                                                                          | 0.0144                             | 0.0017        | LX-2 enriched              |
| RPS4X 40S ribosomal protein S4, X isoform                                                                | 0.0495                             | 0.0061        | LX-2 enriched              |
| RPL24 60S ribosomal protein L24                                                                          | 0.0159                             | 0.0018        | LX-2 enriched              |
| RPLP0 60S acidic ribosomal protein P0                                                                    | 0.0116                             | 0.0013        | LX-2 enriched              |
| TUBA1B Tubulin alpha-1B chain                                                                            | 0.1377                             | 0.0186        | LX-2 enriched              |
| RPS3 40S ribosomal protein S3                                                                            | 0.0226                             | 0.0030        | LX-2 enriched              |
| <b>FBN2 fibrillin 2 precursor</b>                                                                        | <b>0.0443</b>                      | <b>0.0039</b> | <b>LX-2 enriched</b>       |
| RPL10A 60S ribosomal protein L10a                                                                        | 0.0139                             | 0.0013        | LX-2 enriched              |
| ACTR3 Actin-related protein 3                                                                            | 0.0087                             | 0.0008        | LX-2 enriched              |
| RPL11 Isoform 1 of 60S ribosomal protein L11                                                             | 0.0038                             | 0.0009        | LX-2 enriched              |
| ATP5A1 ATP synthase subunit alpha, mitochondrial precursor                                               | 0.0115                             | 0.0026        | LX-2 enriched              |
| TMEM43 Transmembrane protein 43                                                                          | 0.0173                             | 0.0043        | LX-2 enriched              |
| KRT10 Keratin, type I cytoskeletal 10                                                                    | 0.0753                             | 0.0182        | LX-2 enriched              |
| RPS13 40S ribosomal protein S13                                                                          | 0.0206                             | 0.0043        | LX-2 enriched              |
| RPS18 40S ribosomal protein S18                                                                          | 0.0495                             | 0.0105        | LX-2 enriched              |
| TGFB1 Transforming growth factor-beta-induced protein ig-h3 precursor                                    | 0.1228                             | 0.0270        | LX-2 enriched              |
| TNC Isoform 1 of Tensin precursor                                                                        | 0.2523                             | 0.0543        | LX-2 enriched              |
| RPM1 Dotchyl-diphosphooligosaccharide-protein glycosyltransferase 67 kDa subunit precursor               | 0.0120                             | 0.0026        | LX-2 enriched              |
| TUBB Tubulin beta chain                                                                                  | 0.1790                             | 0.0358        | LX-2 enriched              |
| ARPC2 Actin-related protein 2/3 complex subunit 2                                                        | 0.0029                             | 0.0009        | LX-2 enriched              |
| ATP5B ATP synthase subunit beta, mitochondrial precursor                                                 | 0.0162                             | 0.0048        | LX-2 enriched              |
| RPS25 40S ribosomal protein S25                                                                          | 0.0178                             | 0.0052        | LX-2 enriched              |
| KRT2 Keratin, type II cytoskeletal 2 epidermal                                                           | 0.0632                             | 0.0187        | LX-2 enriched              |
| <b>SERPINH1 Serpin H1 precursor</b>                                                                      | <b>0.0029</b>                      | <b>0.0008</b> | <b>LX-2 enriched</b>       |
| FLOT1 Flotillin-1                                                                                        | 0.0231                             | 0.0069        | LX-2 enriched              |
| DDOST1 dotchyl-diphosphooligosaccharide-protein glycosyltransferase precursor                            | 0.0063                             | 0.0017        | LX-2 enriched              |
| RPS16 40S ribosomal protein S16                                                                          | 0.0188                             | 0.0061        | LX-2 enriched              |
| RPL7A 60S ribosomal protein L7a                                                                          | 0.0173                             | 0.0056        | LX-2 enriched              |
| Serum albumin precursor                                                                                  | 0.1571                             | 0.0516        | LX-2 enriched              |
| ACTN1 Alpha-actinin-1                                                                                    | 0.0038                             | 0.0013        | LX-2 enriched              |
| <b>RPL6 60S ribosomal protein L6</b>                                                                     | <b>0.0164</b>                      | <b>0.0056</b> | <b>LX-2 enriched</b>       |
| LWNA Isoform A of Lamin-A/C                                                                              | 0.0081                             | 0.0030        | HFF and LX-2 Shared        |
| KRT1 Keratin, type II cytoskeletal 1                                                                     | 0.1866                             | 0.0730        | HFF and LX-2 Shared        |
| VDAC2 Voltage-dependent anion-selective channel protein 2                                                | 0.0149                             | 0.0065        | HFF and LX-2 Shared        |
| VDAC3 Isoform 1 of Voltage-dependent anion-selective channel protein 3                                   | 0.0130                             | 0.0056        | HFF and LX-2 Shared        |
| RPL8 60S ribosomal protein L8                                                                            | 0.0072                             | 0.0031        | HFF and LX-2 Shared        |
| RPL18 60S ribosomal protein L18                                                                          | 0.0101                             | 0.0043        | HFF and LX-2 Shared        |
| ANXA6 Annexin A6                                                                                         | 0.0288                             | 0.0134        | HFF and LX-2 Shared        |
| RPL7 60S ribosomal protein L7                                                                            | 0.0139                             | 0.0065        | HFF and LX-2 Shared        |
| ANXA2 Annexin A2                                                                                         | 0.0058                             | 0.0026        | HFF and LX-2 Shared        |
| <b>AN2 Alpha-2-macroglobulin precursor</b>                                                               | <b>0.0063</b>                      | <b>0.0028</b> | <b>HFF and LX-2 Shared</b> |
| ERLIN2 Isoform 1 of Erlin-2 precursor                                                                    | 0.0116                             | 0.0056        | HFF and LX-2 Shared        |
| RPL27A 60S ribosomal protein L27a                                                                        | 0.0072                             | 0.0035        | HFF and LX-2 Shared        |
| KRT6A Keratin, type II cytoskeletal 6A                                                                   | 0.0106                             | 0.0055        | HFF and LX-2 Shared        |
| VIM Vimentin                                                                                             | 0.1060                             | 0.0576        | HFF and LX-2 Shared        |

| Gene symbol and protein name <sup>a</sup>                                                              | Mean normalised spectral count (%) |               | Cluster                    |
|--------------------------------------------------------------------------------------------------------|------------------------------------|---------------|----------------------------|
|                                                                                                        | LX-2                               | HFF           |                            |
| RPS14 40S ribosomal protein S14                                                                        | 0.0057                             | 0.0031        | HFF and LX-2 Shared        |
| RPL27 60S ribosomal protein L27                                                                        | 0.0029                             | 0.0019        | HFF and LX-2 Shared        |
| NT5E 5'-nucleotidase precursor                                                                         | 0.0198                             | 0.0125        | HFF and LX-2 Shared        |
| <b>NID2 Nidogen-2 precursor</b>                                                                        | <b>0.0087</b>                      | <b>0.0052</b> | <b>HFF and LX-2 Shared</b> |
| MYH10 Isoform 1 of Myosin-10                                                                           | 0.0597                             | 0.0364        | HFF and LX-2 Shared        |
| STOM Erythrocyte band 7 integral membrane protein                                                      | 0.0121                             | 0.0070        | HFF and LX-2 Shared        |
| H2AFV Histone H2AV                                                                                     | 0.0202                             | 0.0159        | HFF and LX-2 Shared        |
| <b>COL6A2 Isoform 2C2 of Collagen alpha-2(VI) chain precursor</b>                                      | <b>0.0475</b>                      | <b>0.0377</b> | <b>HFF and LX-2 Shared</b> |
| COL6A3 alpha 3 type VI collagen isoform 1 precursor                                                    | 0.4003                             | 0.3190        | HFF and LX-2 Shared        |
| KRT9 Keratin, type I cytoskeletal 9                                                                    | 0.0834                             | 0.0592        | HFF and LX-2 Shared        |
| ARPC4 Actin-related protein 2/3 complex subunit 4                                                      | 0.0019                             | 0.0013        | HFF and LX-2 Shared        |
| Trypsin - Sus scrofa (Pig)                                                                             | 0.0847                             | 0.0639        | HFF and LX-2 Shared        |
| CKAP4 Isoform 1 of Cytoskeleton-associated protein 4                                                   | 0.0131                             | 0.0095        | HFF and LX-2 Shared        |
| MYH9 Myosin-9                                                                                          | 0.3314                             | 0.3178        | HFF and LX-2 Shared        |
| <b>COL1A1 Collagen alpha-1(I) chain precursor</b>                                                      | <b>0.0115</b>                      | <b>0.0113</b> | <b>HFF and LX-2 Shared</b> |
| <b>C3 Complement C3 precursor (Fragment)</b>                                                           | <b>0.0033</b>                      | <b>0.0033</b> | <b>HFF and LX-2 Shared</b> |
| HIST2H2BE Histone H2B type 2-E                                                                         | 0.0631                             | 0.0623        | HFF and LX-2 Shared        |
| THY1 Thy-1 membrane glycoprotein precursor                                                             | 0.0058                             | 0.0069        | HFF and LX-2 Shared        |
| HIST1H2BL Histone H2B type 1-L                                                                         | 0.0640                             | 0.0768        | HFF and LX-2 Shared        |
| TPM1 Isoform 3 of Tropomyosin alpha-1 chain                                                            | 0.0043                             | 0.0056        | HFF and LX-2 Shared        |
| HIST1H2AH Histone H2A type 1-H                                                                         | 0.0424                             | 0.0463        | HFF and LX-2 Shared        |
| RPS27A-UBC Ubiquitin and ribosomal protein S27a precursor                                              | 0.0263                             | 0.0285        | HFF and LX-2 Shared        |
| <b>HSPG2 Basement membrane-specific heparan sulfate proteoglycan core protein precursor (perlecan)</b> | <b>0.0540</b>                      | <b>0.0634</b> | <b>HFF and LX-2 Shared</b> |
| <b>TGM2 Isoform 1 of Protein-glutamine gamma-glutamyltransferase 2 (transglutaminase 2)</b>            | <b>0.0125</b>                      | <b>0.0228</b> | <b>HFF and LX-2 Shared</b> |
| ACTA1 Actin, alpha skeletal muscle                                                                     | 0.0642                             | 0.1184        | HFF and LX-2 Shared        |
| HIST1H1B Histone H1.5                                                                                  | 0.0144                             | 0.0233        | HFF and LX-2 Shared        |
| HIST1H1D Histone H1.3                                                                                  | 0.0163                             | 0.0260        | HFF and LX-2 Shared        |
| MYL6 Isoform Non-muscle of Myosin light polypeptide 6                                                  | 0.0177                             | 0.0248        | HFF and LX-2 Shared        |
| <b>ACTB Actin, cytoplasmic 1</b>                                                                       | <b>0.1258</b>                      | <b>0.1824</b> | <b>HFF and LX-2 Shared</b> |

**Table S6. Statistical analysis of abundance changes of proteins identified in LX-2 and HFF CDM purifications**

Qspec output. FDRs≤5% estimated if Bayes Factor ≥10 and Fold change ≥1.5 or ≤-1.5

Positive Fold changes are enriched to LX-2 and negative fold changes are enriched to HFF and values are represented as Ln(fold change)

All ECM and secreted proteins are highlighted in grey

| Identified Proteins (277)                                                                            | Accession Number | Unweighted spectrum counts |               |               | Unweighted spectrum counts |              |              | Bayes Factor | Fold Change | Significant |
|------------------------------------------------------------------------------------------------------|------------------|----------------------------|---------------|---------------|----------------------------|--------------|--------------|--------------|-------------|-------------|
|                                                                                                      |                  | LX-2 repeat 1              | LX-2 repeat 2 | LX-2 repeat 3 | HFF repeat 1               | HFF repeat 2 | HFF repeat 3 |              |             |             |
| A2M Alpha-2-macroglobulin precursor                                                                  | IPI00478003      | 0                          | 13            | 0             | 0                          | 0            | 6            | 0.395        | 0.159       |             |
| ABCD3 ATP-binding cassette sub-family D member 3                                                     | IPI0002372       | 11                         | 0             | 3             | 0                          | 0            | 0            | 30.262       | 3.049       | Yes         |
| ACTA1 Actin, alpha skeletal muscle                                                                   | IPI00021428      | 55                         | 0             | 79            | 148                        | 126          | 0            | 0.118        | -0.166      |             |
| ACTB Actin, cytoplasmic 1                                                                            | IPI00021439      | 118                        | 7             | 137           | 209                        | 176          | 34           | 17.169       | -0.796      |             |
| ACTN1 Alpha-actinin-1                                                                                | IPI00013508      | 4                          | 0             | 4             | 3                          | 0            | 0            | 0.662        | 1.071       |             |
| ACTR2 Actin-related protein 2                                                                        | IPI00005159      | 7                          | 0             | 5             | 0                          | 0            | 0            | 51.992       | 3.134       | Yes         |
| ACTR3 Actin-related protein 3                                                                        | IPI00028091      | 10                         | 0             | 8             | 2                          | 0            | 0            | 38.062       | 2.094       | Yes         |
| ADAMTS1 ADAMTS-1 precursor                                                                           | IPI00005908      | 0                          | 0             | 0             | 0                          | 2            | 0            | 1.874        | -1.66       |             |
| AGRN Agrin precursor                                                                                 | IPI00374563      | 16                         | 0             | 13            | 0                          | 0            | 0            | 4250.098     | 3.564       | Yes         |
| ANPEP Aminopeptidase N (CD13)                                                                        | IPI00221224      | 0                          | 0             | 0             | 25                         | 33           | 0            | 24352.715    | -3.845      | Yes         |
| ANXA1 Annexin A1                                                                                     | IPI00218918      | 2                          | 0             | 0             | 0                          | 0            | 0            | 1.777        | 1.711       |             |
| ANXA2 Annexin A2                                                                                     | IPI00455315      | 6                          | 0             | 6             | 4                          | 2            | 0            | 0.987        | 0.745       |             |
| ANXA5 Annexin A5                                                                                     | IPI00329801      | 6                          | 0             | 2             | 0                          | 0            | 0            | 11.323       | 2.822       | Yes         |
| ANXA6 Annexin A6                                                                                     | IPI00221226      | 26                         | 0             | 34            | 14                         | 17           | 0            | 3.678        | 0.443       |             |
| ARF1 ADP-ribosylation factor 1                                                                       | IPI00215914      | 0                          | 0             | 7             | 0                          | 0            | 0            | 5.579        | 2.266       |             |
| ARPC2 Actin-related protein 2/3 complex subunit 2                                                    | IPI00005161      | 3                          | 0             | 3             | 0                          | 2            | 0            | 1.105        | 1.169       |             |
| ARPC3 Actin-related protein 2/3 complex subunit 3                                                    | IPI00005162      | 6                          | 0             | 6             | 0                          | 0            | 0            | 75.441       | 3.072       | Yes         |
| ARPC4 Actin-related protein 2/3 complex subunit 4                                                    | IPI00554811      | 0                          | 0             | 4             | 0                          | 3            | 0            | 0.503        | 0.142       |             |
| ATAD3A ATPase family, AAA domain containing 3A                                                       | IPI00646144      | 3                          | 0             | 2             | 0                          | 0            | 0            | 4.277        | 2.442       |             |
| ATP5A1 ATP synthase subunit alpha, mitochondrial precursor                                           | IPI00440493      | 8                          | 0             | 16            | 3                          | 3            | 0            | 18.459       | 1.199       |             |
| ATP5B ATP synthase subunit beta, mitochondrial precursor                                             | IPI00303476      | 9                          | 0             | 25            | 6                          | 5            | 0            | 4.729        | 0.815       |             |
| ATP5C1 Isoform Liver of ATP synthase gamma chain, mitochondrial precursor                            | IPI00478410      | 0                          | 0             | 4             | 0                          | 0            | 0            | 2.743        | 2.211       |             |
| ATP5J2 Isoform 1 of ATP synthase f chain, mitochondrial                                              | IPI00220300      | 0                          | 0             | 3             | 0                          | 0            | 0            | 2.112        | 2.037       |             |
| ATP5O ATP synthase subunit O, mitochondrial precursor                                                | IPI00007611      | 0                          | 0             | 0             | 2                          | 0            | 0            | 1.755        | -1.81       |             |
| BANF1 Barrier-to-autointegration factor                                                              | IPI00026087      | 15                         | 0             | 0             | 0                          | 0            | 0            | 4.413        | 2.389       |             |
| BCAM Lutheran blood group glycoprotein precursor (CD239 - laminin receptor)                          | IPI00002406      | 2                          | 0             | 0             | 0                          | 0            | 0            | 1.777        | 1.711       |             |
| BCAP31 B-cell receptor-associated protein 31                                                         | IPI00218200      | 0                          | 0             | 2             | 0                          | 0            | 0            | 1.842        | 1.687       |             |
| BST1 ADP-ribosyl cyclase 2 precursor                                                                 | IPI00026240      | 3                          | 0             | 0             | 0                          | 0            | 0            | 2.118        | 2.018       |             |
| C3 Complement C3 precursor (Fragment)                                                                | IPI00783987      | 0                          | 2             | 5             | 0                          | 0            | 7            | 0.515        | 0.358       |             |
| C4A Complement C4-A precursor                                                                        | IPI00032258      | 0                          | 4             | 0             | 0                          | 0            | 0            | 3.335        | 2.143       |             |
| CAPZA1 F-actin-capping protein subunit alpha-1                                                       | IPI00005969      | 3                          | 0             | 0             | 0                          | 0            | 0            | 2.118        | 2.018       |             |
| CAV1 Caveolin                                                                                        | IPI00853146      | 12                         | 0             | 14            | 0                          | 0            | 0            | 2001.603     | 3.564       | Yes         |
| CD44 Isoform 3 of CD44 antigen precursor                                                             | IPI00827650      | 4                          | 0             | 0             | 4                          | 5            | 0            | 0.758        | -0.967      |             |
| CFL1 Cofilin-1                                                                                       | IPI00012011      | 0                          | 0             | 5             | 0                          | 0            | 0            | 3.199        | 2.301       |             |
| CHCHD3 Coiled-coil-helix-coiled-coil-helix domain-containing protein 3                               | IPI00015833      | 0                          | 0             | 4             | 0                          | 0            | 0            | 2.743        | 2.211       |             |
| CKAP4 Isoform 1 of Cytoskeleton-associated protein 4                                                 | IPI00141318      | 19                         | 0             | 8             | 12                         | 10           | 0            | 0.307        | 0.01        |             |
| CLEC3B Putative uncharacterized protein DKFz686H17246 [tetranectin(plasminogen binding protein)]     | IPI00792115      | 0                          | 3             | 0             | 0                          | 0            | 0            | 2.532        | 2.128       |             |
| CLTC Isoform 1 of Clathrin heavy chain 1                                                             | IPI00024067      | 4                          | 0             | 5             | 0                          | 0            | 0            | 13.098       | 2.672       | Yes         |
| COL12A1 Isoform 1 of Collagen alpha-1(XII) chain precursor                                           | IPI00329573      | 91                         | 0             | 160           | 0                          | 0            | 37           | 140.896      | 2.113       | Yes         |
| COL1A1 Collagen alpha-1(I) chain precursor                                                           | IPI00297646      | 11                         | 0             | 13            | 9                          | 3            | 13           | 0.459        | -0.137      |             |
| COL1A2 Collagen alpha-2(I) chain precursor                                                           | IPI00304962      | 0                          | 0             | 0             | 4                          | 0            | 0            | 5.975        | -2.047      |             |
| COL4A1 Collagen alpha-1(IV) chain precursor                                                          | IPI00844360      | 0                          | 0             | 4             | 0                          | 0            | 0            | 2.743        | 2.211       |             |
| COL4A2 Collagen alpha-2(IV) chain precursor                                                          | IPI00306322      | 0                          | 0             | 3             | 0                          | 0            | 0            | 2.112        | 2.037       |             |
| COL5A1 Collagen alpha-1(V) chain precursor                                                           | IPI00844090      | 8                          | 0             | 8             | 0                          | 0            | 0            | 283.124      | 3.207       | Yes         |
| COL5A2 Collagen alpha-2(V) chain precursor                                                           | IPI00739099      | 0                          | 0             | 0             | 0                          | 0            | 4            | 1.216        | -2.604      |             |
| COL6A1 Collagen alpha-1(VI) chain precursor                                                          | IPI00291136      | 42                         | 36            | 34            | 19                         | 31           | 58           | 0.627        | 0.109       |             |
| COL6A2 Isoform 2C2 of Collagen alpha-2(VI) chain precursor                                           | IPI00304840      | 22                         | 37            | 40            | 27                         | 23           | 34           | 0.997        | 0.155       |             |
| COL6A3 alpha 3 type VI collagen isoform 1 precursor                                                  | IPI00022200      | 222                        | 256           | 356           | 199                        | 193          | 316          | 2.004        | 0.16        |             |
| COX5A Cytochrome c oxidase subunit 5A, mitochondrial precursor                                       | IPI00025086      | 2                          | 0             | 0             | 0                          | 0            | 0            | 1.777        | 1.711       |             |
| CPNE1 Copine-1                                                                                       | IPI00018452      | 3                          | 0             | 9             | 0                          | 0            | 0            | 26.107       | 3.173       | Yes         |
| CPNE2 Copine II                                                                                      | IPI00645310      | 2                          | 0             | 0             | 0                          | 0            | 0            | 1.777        | 1.711       |             |
| CPZ Isoform 1 of Carboxypeptidase Z precursor                                                        | IPI00396391      | 0                          | 8             | 0             | 0                          | 0            | 0            | 4.417        | 2.439       |             |
| CS citrate synthase precursor, isoform b                                                             | IPI00383539      | 0                          | 0             | 2             | 0                          | 0            | 0            | 1.842        | 1.687       |             |
| CSNK2A1 Casein kinase II subunit alpha                                                               | IPI00744507      | 4                          | 0             | 4             | 0                          | 0            | 0            | 13.981       | 2.895       | Yes         |
| CYR61 Protein CYR61 precursor                                                                        | IPI00299219      | 0                          | 39            | 3             | 0                          | 0            | 0            | 47.803       | 3.337       | Yes         |
| DDOST dolichyl-diphosphooligosaccharide-protein glycosyltransferase precursor                        | IPI00297084      | 8                          | 0             | 5             | 2                          | 2            | 0            | 2.772        | 1.089       |             |
| DDX3X ATP-dependent RNA helicase DDX3X                                                               | IPI00215637      | 4                          | 0             | 6             | 0                          | 0            | 0            | 23.265       | 2.878       | Yes         |
| DDX5 Probable ATP-dependent RNA helicase DDX5                                                        | IPI00017617      | 0                          | 0             | 4             | 0                          | 0            | 0            | 2.743        | 2.211       |             |
| DPT Dermatotontin precursor                                                                          | IPI00292130      | 0                          | 0             | 0             | 0                          | 0            | 3            | 3.177        | -1.892      |             |
| EDIL3 Isoform 1 of EGF-like repeat and discoidin I-like domain-containing protein 3 precursor (DEL1) | IPI00306046      | 0                          | 8             | 0             | 0                          | 0            | 0            | 4.417        | 2.439       |             |
| EEF1A1 Elongation factor 1-alpha 1                                                                   | IPI00396485      | 28                         | 0             | 43            | 0                          | 9            | 0            | 128.041      | 2.04        | Yes         |
| EEF2 Elongation factor 2                                                                             | IPI00186290      | 3                          | 0             | 0             | 0                          | 0            | 0            | 2.118        | 2.018       |             |
| EFEMP2 EGF-containing fibulin-like extracellular matrix protein 2 precursor (fibulin 4)              | IPI00296058      | 0                          | 0             | 0             | 4                          | 2            | 0            | 4.332        | -2.815      |             |
| EFTUD2 116 kDa U5 small nuclear ribonucleoprotein component                                          | IPI00003519      | 6                          | 0             | 3             | 0                          | 0            | 0            | 17.613       | 2.854       | Yes         |
| EGFL7 EGF-like domain-containing protein 7 precursor (VE-statin)                                     | IPI00383960      | 8                          | 0             | 2             | 0                          | 0            | 0            | 20.367       | 3.038       | Yes         |
| EIF3A Eukaryotic translation initiation factor 3 subunit 10                                          | IPI00029012      | 2                          | 0             | 0             | 0                          | 0            | 0            | 1.777        | 1.711       |             |
| EIF4A1 Eukaryotic initiation factor 4A-1                                                             | IPI00025491      | 9                          | 0             | 14            | 0                          | 0            | 0            | 1148.851     | 3.272       | Yes         |

| Identified Proteins (277)                                                                                                                | Accession Number | Unweighted spectrum counts |               |               | Unweighted spectrum counts |              |              | Bayer Factor | Fold Change | Significant |
|------------------------------------------------------------------------------------------------------------------------------------------|------------------|----------------------------|---------------|---------------|----------------------------|--------------|--------------|--------------|-------------|-------------|
|                                                                                                                                          |                  | LX-2 repeat 1              | LX-2 repeat 2 | LX-2 repeat 3 | HFF repeat 1               | HFF repeat 2 | HFF repeat 3 |              |             |             |
| EIF4A3 Eukaryotic initiation factor 4A-III                                                                                               | IPI0009328       | 8                          | 0             | 8             | 0                          | 0            | 0            | 283.124      | 3.207       | Yes         |
| EMILIN1 EMILIN-1 precursor                                                                                                               | IPI00013079      | 0                          | 0             | 0             | 44                         | 34           | 10           | 136515.475   | -4.74       | Yes         |
| ENTPD4;LOXL2 Lysyl oxidase homolog 2 precursor                                                                                           | IPI00782994      | 0                          | 0             | 2             | 0                          | 0            | 0            | 1.842        | 1.687       |             |
| ERLIN1 ER lipid raft associated 1                                                                                                        | IPI00007940      | 10                         | 0             | 0             | 0                          | 0            | 0            | 5.194        | 2.585       |             |
| ERLIN2 Isoform 1 of Erlin-2 precursor                                                                                                    | IPI00026942      | 14                         | 0             | 10            | 7                          | 6            | 0            | 0.87         | 0.538       |             |
| FBLN1 Isoform B of Fibulin-1 precursor                                                                                                   | IPI00218803      | 0                          | 0             | 0             | 9                          | 8            | 0            | 304.689      | -3.481      | Yes         |
| FBLN2 Fibulin-2 precursor                                                                                                                | IPI00023824      | 12                         | 0             | 2             | 41                         | 29           | 0            | 126.078      | -1.355      |             |
| FBN1 312 kDa protein (fibrillin 1)                                                                                                       | IPI00784458      | 188                        | 218           | 153           | 20                         | 11           | 0            | 2.82852E+12  | 3.067       | Yes         |
| FBN2 fibrillin 2 precursor                                                                                                               | IPI00019439      | 28                         | 35            | 29            | 6                          | 3            | 0            | 540382.66    | 2.41        | Yes         |
| FGF2 fibroblast growth factor 2                                                                                                          | IPI00154603      | 2                          | 0             | 0             | 6                          | 0            | 0            | 0.963        | -0.666      |             |
| FLNA Filamin-A                                                                                                                           | IPI00333541      | 10                         | 0             | 14            | 0                          | 0            | 0            | 1439.766     | 3.501       | Yes         |
| FLOT1 Flotillin-1                                                                                                                        | IPI00027438      | 23                         | 0             | 25            | 8                          | 8            | 0            | 25.428       | 0.88        |             |
| FLOT2 flotillin 2                                                                                                                        | IPI00789008      | 30                         | 0             | 25            | 4                          | 5            | 0            | 560.851      | 1.469       | Yes         |
| FN1 fibronectin 1 isoform 4 preproprotein                                                                                                | IPI00414283      | 164                        | 0             | 141           | 584                        | 545          | 49           | 0.009        | -2.04       |             |
| GANAB Isoform 1 of Neutral alpha-glucosidase AB precursor                                                                                | IPI00383581      | 2                          | 0             | 0             | 0                          | 0            | 0            | 1.777        | 1.711       |             |
| GAPDH Glyceraldehyde-3-phosphate dehydrogenase                                                                                           | IPI00219018      | 5                          | 0             | 10            | 3                          | 0            | 0            | 4.07         | 1.498       |             |
| GNAI2 Isoform 1 of Guanine nucleotide-binding protein G(i), alpha-2 subunit                                                              | IPI00748145      | 12                         | 0             | 6             | 0                          | 3            | 0            | 9.582        | 1.727       |             |
| GNB1 Guanine nucleotide-binding protein G(i)/G(S)/G(T) subunit beta-1                                                                    | IPI00026268      | 4                          | 0             | 4             | 0                          | 0            | 0            | 13.981       | 2.895       | Yes         |
| GNB2 Guanine nucleotide-binding protein G(i)/G(S)/G(T) subunit beta-2                                                                    | IPI00003348      | 4                          | 0             | 0             | 0                          | 0            | 0            | 3.804        | 2.112       |             |
| GREM1 Isoform 1 of Gremlin-1 precursor                                                                                                   | IPI00298476      | 0                          | 5             | 0             | 0                          | 0            | 0            | 4.152        | 2.267       |             |
| GSN Isoform 1 of Gelsolin precursor                                                                                                      | IPI00026314      | 2                          | 0             | 5             | 0                          | 0            | 0            | 6.418        | 2.754       |             |
| H2AFV Histone H2AV                                                                                                                       | IPI00018278      | 21                         | 0             | 21            | 0                          | 36           | 0            | 1.255        | 1.818       |             |
| H2AFY H2A histone family, member Y isoform 2                                                                                             | IPI00059366      | 3                          | 0             | 8             | 13                         | 16           | 0            | 7.585        | -0.916      |             |
| H2BFS Histone H2B                                                                                                                        | IPI00745513      | 0                          | 0             | 2             | 0                          | 0            | 0            | 1.842        | 1.687       |             |
| HADHA Trifunctional enzyme subunit alpha, mitochondrial precursor                                                                        | IPI00031522      | 11                         | 0             | 2             | 0                          | 0            | 0            | 15.793       | 3.302       | Yes         |
| HADHB Trifunctional enzyme beta subunit, mitochondrial precursor                                                                         | IPI00022793      | 0                          | 0             | 2             | 0                          | 0            | 0            | 1.842        | 1.687       |             |
| HBA2;HBA1 Hemoglobin subunit alpha                                                                                                       | IPI00410714      | 4                          | 11            | 14            | 12                         | 22           | 44           | 17.648       | -1.003      |             |
| HBB Hemoglobin subunit beta                                                                                                              | IPI00654755      | 0                          | 5             | 10            | 0                          | 0            | 0            | 141.741      | 3.414       | Yes         |
| HIST1H1B Histone H1.5                                                                                                                    | IPI00217468      | 17                         | 0             | 13            | 30                         | 24           | 0            | 3.296        | -0.426      |             |
| HIST1H1D Histone H1.3                                                                                                                    | IPI00217466      | 16                         | 0             | 18            | 31                         | 29           | 0            | 0.417        | -0.387      |             |
| HIST1H2AH Histone H2A type 1-H                                                                                                           | IPI00081836      | 47                         | 9             | 32            | 55                         | 52           | 0            | 0.048        | 0.404       |             |
| HIST1H2BL Histone H2B type 1-L                                                                                                           | IPI00018534      | 76                         | 0             | 57            | 87                         | 86           | 4            | 0.017        | -0.407      |             |
| HIST1H3F;HIST1H3E;HIST1H3H;HIST1H3J;HIST1H3B;HIST1H3A;HIST1H3I;HIST1H3C;HIST1H3G;HIST1H3D;HIST1H2BN Histone H3.1                         | IPI00465070      | 8                          | 0             | 10            | 71                         | 66           | 28           | 131962.716   | -2.043      | Yes         |
| HIST1H4F;HIST2H4B;HIST1H4L;HIST1H4I;HIST1H4A;HIST1H4J;HIST1H4K;HIST1H4D;HIST1H4E;HIST1H4C;HIST1H4H;HIST1H4H;HIST1H4B;HIST2H4A Histone H4 | IPI00453473      | 93                         | 11            | 67            | 193                        | 168          | 91           | 90877.755    | -1.478      |             |
| HIST2H2BE Histone H2B type 2-E                                                                                                           | IPI00009395      | 74                         | 0             | 57            | 73                         | 71           | 0            | 0.723        | -0.045      |             |
| HNRNPC Isoform C1 of Heterogeneous nuclear ribonucleoproteins C1/C2                                                                      | IPI00216592      | 12                         | 0             | 8             | 0                          | 0            | 0            | 732.979      | 3.671       | Yes         |
| HNRNPU Heterogeneous nuclear ribonucleoprotein U                                                                                         | IPI00644224      | 0                          | 0             | 8             | 0                          | 0            | 0            | 5.344        | 2.593       |             |
| HNRNPH1 Heterogeneous nuclear ribonucleoprotein H                                                                                        | IPI00013881      | 0                          | 0             | 2             | 0                          | 0            | 0            | 1.842        | 1.687       |             |
| HNRPM Isoform 1 of Heterogeneous nuclear ribonucleoprotein M                                                                             | IPI00171903      | 3                          | 0             | 3             | 0                          | 0            | 0            | 5.383        | 2.72        |             |
| HSP90AB1 85 kDa protein                                                                                                                  | IPI00334775      | 4                          | 0             | 9             | 0                          | 0            | 0            | 59.336       | 3.233       | Yes         |
| HSPA8 Isoform 1 of Heat shock cognate 71 kDa protein                                                                                     | IPI00003865      | 12                         | 0             | 10            | 0                          | 0            | 0            | 1261.608     | 3.521       | Yes         |
| HSPB1 Heat shock protein beta-1                                                                                                          | IPI00025512      | 0                          | 0             | 4             | 4                          | 5            | 0            | 1.097        | -0.94       |             |
| HSPD1 60 kDa heat shock protein, mitochondrial precursor                                                                                 | IPI00784154      | 0                          | 0             | 3             | 0                          | 0            | 0            | 2.112        | 2.037       |             |
| HSPG2 Basement membrane-specific heparan sulfate proteoglycan core protein precursor (perlecan)                                          | IPI00024284      | 66                         | 0             | 46            | 112                        | 104          | 0            | 0.54         | -0.209      |             |
| HTRA1 Serine protease HTRA1 precursor                                                                                                    | IPI00003176      | 0                          | 8             | 0             | 0                          | 0            | 0            | 4.417        | 2.439       |             |
| IGFBP5 Insulin-like growth factor-binding protein 5 precursor                                                                            | IPI00029236      | 0                          | 2             | 0             | 0                          | 0            | 0            | 1.684        | 1.883       |             |
| IMMT Isoform 1 of Mitochondrial inner membrane protein                                                                                   | IPI00009960      | 7                          | 0             | 17            | 0                          | 0            | 0            | 432.926      | 3.333       | Yes         |
| KRT1 Keratin, type II cytoskeletal 1                                                                                                     | IPI00220327      | 104                        | 219           | 64            | 77                         | 40           | 48           | 98.758       | 0.752       |             |
| KRT10 Keratin, type I cytoskeletal 10                                                                                                    | IPI00009865      | 47                         | 93            | 16            | 11                         | 6            | 23           | 80.311       | 1.237       |             |
| KRT14 Keratin, type I cytoskeletal 14                                                                                                    | IPI00384444      | 0                          | 27            | 0             | 0                          | 0            | 0            | 2.34         | 2.498       |             |
| KRT18 Keratin, type I cytoskeletal 18                                                                                                    | IPI00784347      | 10                         | 0             | 9             | 0                          | 0            | 0            | 553.133      | 3.416       | Yes         |
| KRT2 Keratin, type II cytoskeletal 2 epidermal                                                                                           | IPI00021304      | 36                         | 75            | 20            | 19                         | 6            | 17           | 96.819       | 1.045       |             |
| KRT5 Keratin, type II cytoskeletal 5                                                                                                     | IPI00009867      | 0                          | 20            | 0             | 0                          | 0            | 3            | 0.772        | 0.423       |             |
| KRT6A Keratin, type II cytoskeletal 6A                                                                                                   | IPI00300725      | 0                          | 22            | 0             | 13                         | 0            | 0            | 0.58         | -0.05       |             |
| KRT8 Keratin, type II cytoskeletal 8                                                                                                     | IPI00554648      | 12                         | 0             | 8             | 0                          | 0            | 0            | 732.979      | 3.671       | Yes         |
| KRT9 Keratin, type I cytoskeletal 9                                                                                                      | IPI00019359      | 48                         | 94            | 31            | 43                         | 35           | 54           | 0.448        | 0.243       |             |
| LAMA4 Isoform 1 of Laminin subunit alpha-4 precursor                                                                                     | IPI00329482      | 0                          | 0             | 4             | 0                          | 0            | 0            | 2.743        | 2.211       |             |
| LAMA5 Laminin subunit alpha-5 precursor                                                                                                  | IPI00783665      | 28                         | 0             | 9             | 0                          | 0            | 0            | 1287.393     | 3.474       | Yes         |
| LAMB1 Laminin subunit beta-1 precursor                                                                                                   | IPI00013976      | 13                         | 0             | 2             | 0                          | 0            | 0            | 24.009       | 3.033       | Yes         |
| LAMB2 Laminin subunit beta-2 precursor                                                                                                   | IPI00296922      | 2                          | 0             | 0             | 0                          | 0            | 0            | 1.777        | 1.711       |             |
| LAMC1 Laminin subunit gamma-1 precursor                                                                                                  | IPI00298281      | 4                          | 0             | 0             | 0                          | 0            | 0            | 3.804        | 2.112       |             |
| LGALS1 Galectin-1                                                                                                                        | IPI00219219      | 0                          | 2             | 0             | 0                          | 0            | 0            | 1.684        | 1.883       |             |
| LMNA Isoform A of Lamin-A/C                                                                                                              | IPI00021405      | 5                          | 0             | 12            | 7                          | 0            | 0            | 1.67         | 1.033       |             |
| LMNB1 Lamin-B1                                                                                                                           | IPI00217975      | 3                          | 0             | 0             | 0                          | 0            | 0            | 2.118        | 2.018       |             |
| LRRIC17 Isoform 1 of Leucine-rich repeat-containing protein 17 precursor                                                                 | IPI00171160      | 19                         | 57            | 22            | 0                          | 0            | 0            | 76795.79     | 4.628       | Yes         |
| MFI2 Isoform 1 of Melanotransferrin precursor                                                                                            | IPI00029275      | 0                          | 0             | 2             | 0                          | 0            | 0            | 1.842        | 1.687       |             |
| MGST3 Microsomal glutathione S-transferase 3                                                                                             | IPI00024266      | 0                          | 0             | 7             | 0                          | 0            | 0            | 5.579        | 2.266       |             |
| MME Neprilysin (CD10)                                                                                                                    | IPI00247063      | 0                          | 0             | 0             | 0                          | 3            | 0            | 1.638        | -1.853      |             |
| MOXD1 Isoform 1 of DBH-like monooxygenase protein 1 precursor                                                                            | IPI00419596      | 0                          | 0             | 0             | 2                          | 0            | 0            | 1.755        | -1.81       |             |
| MPHOSPH1 Isoform 1 of M-phase phosphoprotein 1                                                                                           | IPI00044751      | 0                          | 0             | 2             | 0                          | 0            | 0            | 1.842        | 1.687       |             |
| MRLC2 Myosin regulatory light chain                                                                                                      | IPI00033494      | 12                         | 0             | 20            | 15                         | 18           | 0            | 0.5          | -0.038      |             |
| MSN Moesin                                                                                                                               | IPI00219365      | 0                          | 0             | 0             | 3                          | 3            | 0            | 5.407        | -2.833      |             |

| Identified Proteins (277)                                                                    | Accession Number   | Unweighted spectrum counts |               |               | Unweighted spectrum counts |              |              | Bayes Factor     | Fold Change   | Significant |
|----------------------------------------------------------------------------------------------|--------------------|----------------------------|---------------|---------------|----------------------------|--------------|--------------|------------------|---------------|-------------|
|                                                                                              |                    | LX-2 repeat 1              | LX-2 repeat 2 | LX-2 repeat 3 | HFF repeat 1               | HFF repeat 2 | HFF repeat 3 |                  |               |             |
| MVP Major vault protein                                                                      | IPI0000105         | 17                         | 0             | 29            | 0                          | 0            | 0            | 8862.143         | 3.73          | Yes         |
| <b>MXRAS Matrix-remodeling-associated protein 5 precursor (adican)</b>                       | <b>IPI00012347</b> | <b>0</b>                   | <b>0</b>      | <b>0</b>      | <b>20</b>                  | <b>18</b>    | <b>8</b>     | <b>10312.426</b> | <b>-3.95</b>  | <b>Yes</b>  |
| MYADM Myeloid-associated differentiation marker                                              | IPI00102685        | 0                          | 0             | 5             | 0                          | 0            | 0            | 3.199            | 2.301         |             |
| MYH10 Isoform 1 of Myosin-10                                                                 | IPI00397526        | 37                         | 0             | 88            | 41                         | 43           | 0            | 0.129            | -0.015        |             |
| MYH9 Myosin-9                                                                                | IPI00019502        | 231                        | 0             | 462           | 413                        | 323          | 0            | 0.354            | -0.032        |             |
| MYL6 Isoform Non-muscle of Myosin light polypeptide 6                                        | IPI00335168        | 15                         | 0             | 22            | 24                         | 33           | 0            | 0.016            | -0.265        |             |
| MYL9 Myosin regulatory light chain 2, smooth muscle isoform                                  | IPI00220278        | 0                          | 0             | 14            | 0                          | 0            | 0            | 5.396            | 2.39          |             |
| MYO1C Myosin-Ic                                                                              | IPI00010418        | 7                          | 0             | 0             | 21                         | 15           | 0            | 21.199           | -1.716        | Yes         |
| MYO1D Isoform 1 of Myosin-IId                                                                | IPI00329719        | 0                          | 0             | 0             | 0                          | 2            | 0            | 1.874            | -1.66         |             |
| NCL Isoform 1 of Nucleolin                                                                   | IPI00604620        | 2                          | 0             | 0             | 0                          | 0            | 0            | 1.777            | 1.711         |             |
| <b>NID1 Isoform 1 of Nidogen-1 precursor</b>                                                 | <b>IPI00026944</b> | <b>20</b>                  | <b>0</b>      | <b>5</b>      | <b>0</b>                   | <b>0</b>     | <b>0</b>     | <b>193.137</b>   | <b>3.337</b>  | <b>Yes</b>  |
| <b>NID2 Nidogen-2 precursor</b>                                                              | <b>IPI00028908</b> | <b>15</b>                  | <b>0</b>      | <b>3</b>      | <b>4</b>                   | <b>8</b>     | <b>0</b>     | <b>0.582</b>     | <b>0.131</b>  | <b>Yes</b>  |
| NTSE 5'-nucleotidase precursor                                                               | IPI00009456        | 28                         | 0             | 13            | 18                         | 11           | 0            | 0.262            | 0.197         |             |
| PABPC1 Isoform 1 of Polyadenylate-binding protein 1                                          | IPI00008524        | 2                          | 0             | 0             | 0                          | 0            | 0            | 1.777            | 1.711         |             |
| PCBP2 poly(rC)-binding protein 2 isoform a                                                   | IPI00796337        | 2                          | 0             | 0             | 0                          | 0            | 0            | 1.777            | 1.711         |             |
| PDI A3 Protein disulfide-isomerase A3 precursor                                              | IPI00025252        | 8                          | 0             | 0             | 0                          | 0            | 0            | 3.893            | 2.215         |             |
| PFKP 6-phosphofructokinase type C                                                            | IPI00009790        | 3                          | 0             | 6             | 0                          | 0            | 0            | 14.753           | 2.842         | Yes         |
| PFN1 Profilin-1                                                                              | IPI00216691        | 7                          | 0             | 4             | 0                          | 0            | 0            | 51.344           | 3.064         | Yes         |
| PHB Prohibitin                                                                               | IPI00017334        | 2                          | 0             | 5             | 0                          | 0            | 0            | 6.418            | 2.754         |             |
| PHB2 Prohibitin-2                                                                            | IPI00027252        | 7                          | 0             | 11            | 0                          | 0            | 0            | 518.614          | 3.271         | Yes         |
| PHGDH D-3-phosphoglycerate dehydrogenase                                                     | IPI00011200        | 0                          | 0             | 2             | 0                          | 0            | 0            | 1.842            | 1.687         |             |
| PKM2 Isoform M2 of Pyruvate kinase isozymes M1/M2                                            | IPI00479186        | 2                          | 0             | 11            | 0                          | 0            | 0            | 19.813           | 3.168         | Yes         |
| <b>POSTN Isoform 1 of Periostin precursor</b>                                                | <b>IPI00007960</b> | <b>0</b>                   | <b>0</b>      | <b>0</b>      | <b>3</b>                   | <b>0</b>     | <b>0</b>     | <b>1.907</b>     | <b>-2.099</b> | <b>Yes</b>  |
| PIIB peptidylprolyl isomerase B precursor                                                    | IPI00646304        | 2                          | 0             | 0             | 0                          | 0            | 0            | 1.777            | 1.711         |             |
| PRDX1 Peroxiredoxin-1                                                                        | IPI00000874        | 0                          | 0             | 2             | 0                          | 0            | 0            | 1.842            | 1.687         |             |
| PRKDCBP protein kinase C, delta binding protein                                              | IPI00056334        | 0                          | 0             | 0             | 2                          | 0            | 0            | 1.755            | -1.81         |             |
| PRKDC Isoform 1 of DNA-dependent protein kinase catalytic subunit                            | IPI00296337        | 16                         | 0             | 12            | 0                          | 0            | 0            | 2683.889         | 3.64          | Yes         |
| PRPF8 Pre-mRNA-processing-splicing factor 8                                                  | IPI00007928        | 4                          | 0             | 0             | 0                          | 0            | 0            | 3.804            | 2.112         |             |
| <b>PRSS23 Serine protease 23 precursor</b>                                                   | <b>IPI00026941</b> | <b>13</b>                  | <b>31</b>     | <b>7</b>      | <b>0</b>                   | <b>0</b>     | <b>0</b>     | <b>3367.574</b>  | <b>4.051</b>  | <b>Yes</b>  |
| PTRF Isoform 1 of Polymerase I and transcript release factor                                 | IPI00176903        | 16                         | 0             | 7             | 0                          | 0            | 0            | 465.06           | 3.595         | Yes         |
| RAB1A Isoform 1 of Ras-related protein Rab-1A                                                | IPI00005719        | 8                          | 0             | 8             | 0                          | 0            | 0            | 283.124          | 3.207         | Yes         |
| RALY Isoform 1 of RNA-binding protein Raly                                                   | IPI00216044        | 0                          | 0             | 2             | 0                          | 0            | 0            | 1.842            | 1.687         |             |
| RHOC Rho-related GTP-binding protein RhoC precursor                                          | IPI00027434        | 0                          | 0             | 2             | 0                          | 0            | 0            | 1.842            | 1.687         |             |
| RPL10 60S ribosomal protein L10                                                              | IPI00554723        | 3                          | 16            | 5             | 0                          | 0            | 0            | 19.033           | 3.727         | Yes         |
| RPL10A 60S ribosomal protein L10a                                                            | IPI00412579        | 15                         | 0             | 14            | 0                          | 3            | 0            | 220.221          | 2.077         | Yes         |
| RPL11 Isoform 1 of 60S ribosomal protein L11                                                 | IPI00376798        | 0                          | 0             | 8             | 0                          | 2            | 0            | 1.38             | 0.774         |             |
| RPL12 60S ribosomal protein L12                                                              | IPI00024933        | 5                          | 0             | 5             | 0                          | 0            | 0            | 24.446           | 3.447         | Yes         |
| RPL13A 60S ribosomal protein L13a                                                            | IPI00304612        | 3                          | 0             | 0             | 0                          | 0            | 0            | 2.118            | 2.018         |             |
| RPL14 60S ribosomal protein L14                                                              | IPI00002821        | 13                         | 0             | 7             | 0                          | 0            | 0            | 507.405          | 3.895         | Yes         |
| RPL15 60S ribosomal protein L15                                                              | IPI00470528        | 11                         | 0             | 13            | 0                          | 0            | 0            | 1054.643         | 3.505         | Yes         |
| RPL17 60S ribosomal protein L17                                                              | IPI00413324        | 3                          | 14            | 11            | 0                          | 0            | 0            | 169.187          | 3.806         | Yes         |
| RPL18 60S ribosomal protein L18                                                              | IPI00215719        | 9                          | 0             | 12            | 7                          | 3            | 0            | 1.371            | 0.809         |             |
| RPL18A 60S ribosomal protein L18a                                                            | IPI00026202        | 0                          | 0             | 2             | 0                          | 0            | 0            | 1.842            | 1.687         |             |
| RPL21;LOC729402;LOC731567 60S ribosomal protein L21                                          | IPI00247583        | 0                          | 8             | 5             | 0                          | 0            | 0            | 89.474           | 3.371         | Yes         |
| RPL23 60S ribosomal protein L23                                                              | IPI00010153        | 4                          | 19            | 7             | 2                          | 2            | 0            | 21.526           | 1.811         | Yes         |
| RPL23A;hCG_16001 60S ribosomal protein L23a                                                  | IPI00021266        | 0                          | 20            | 3             | 0                          | 0            | 0            | 54.617           | 3.41          | Yes         |
| RPL24 60S ribosomal protein L24                                                              | IPI00306332        | 6                          | 22            | 5             | 0                          | 4            | 0            | 5.228            | 2.018         |             |
| RPL26L1 60S ribosomal protein L26-like 1                                                     | IPI00007144        | 0                          | 2             | 0             | 0                          | 0            | 0            | 1.684            | 1.883         |             |
| RPL27 60S ribosomal protein L27                                                              | IPI00219155        | 0                          | 4             | 2             | 0                          | 0            | 4            | 0.714            | 0.535         |             |
| RPL27A 60S ribosomal protein L27a                                                            | IPI00456758        | 0                          | 10            | 5             | 0                          | 8            | 0            | 0.76             | 0.947         |             |
| RPL3 60S ribosomal protein L3                                                                | IPI00550021        | 2                          | 0             | 2             | 0                          | 0            | 0            | 2.131            | 2.508         |             |
| RPL30 60S ribosomal protein L30                                                              | IPI00219156        | 2                          | 0             | 3             | 0                          | 0            | 0            | 4.292            | 2.6           |             |
| RPL31 60S ribosomal protein L31                                                              | IPI00026302        | 0                          | 10            | 6             | 0                          | 0            | 0            | 194.612          | 3.224         | Yes         |
| RPL32 60S ribosomal protein L32                                                              | IPI00395998        | 0                          | 3             | 0             | 0                          | 0            | 0            | 2.532            | 2.128         |             |
| RPL35 60S ribosomal protein L35                                                              | IPI00787131        | 0                          | 10            | 6             | 0                          | 0            | 0            | 194.612          | 3.224         | Yes         |
| RPL38 60S ribosomal protein L38                                                              | IPI00215790        | 0                          | 4             | 2             | 0                          | 0            | 0            | 5.695            | 2.565         |             |
| RPL4 60S ribosomal protein L4                                                                | IPI00003918        | 5                          | 0             | 10            | 0                          | 3            | 0            | 4.847            | 1.601         |             |
| RPL6 60S ribosomal protein L6                                                                | IPI00329389        | 18                         | 0             | 16            | 8                          | 5            | 0            | 3.587            | 0.792         |             |
| RPL7 60S ribosomal protein L7                                                                | IPI00030179        | 13                         | 0             | 16            | 7                          | 8            | 0            | 0.954            | 0.596         |             |
| RPL7A 60S ribosomal protein L7a                                                              | IPI00299573        | 17                         | 0             | 19            | 8                          | 5            | 0            | 1.646            | 0.9           |             |
| RPL8 60S ribosomal protein L8                                                                | IPI00012772        | 4                          | 0             | 11            | 0                          | 7            | 0            | 0.969            | 1.071         |             |
| RPL9 60S ribosomal protein L9                                                                | IPI00031691        | 0                          | 0             | 4             | 0                          | 0            | 0            | 2.743            | 2.211         |             |
| RPLP0 60S acidic ribosomal protein P0                                                        | IPI00008530        | 14                         | 0             | 10            | 3                          | 0            | 0            | 33.145           | 2.088         | Yes         |
| RPN1 Dolichyl-diphosphooligosaccharide--protein glycosyltransferase 67 kDa subunit precursor | IPI00025874        | 9                          | 0             | 16            | 3                          | 3            | 0            | 15.717           | 1.208         |             |
| RPS11 40S ribosomal protein S11                                                              | IPI00025091        | 0                          | 7             | 7             | 0                          | 0            | 0            | 108.352          | 3.101         | Yes         |
| RPS13 40S ribosomal protein S13                                                              | IPI00221089        | 7                          | 21            | 15            | 5                          | 5            | 0            | 11.504           | 1.597         | Yes         |
| RPS14 40S ribosomal protein S14                                                              | IPI00026271        | 0                          | 7             | 5             | 0                          | 7            | 0            | 1.229            | 0.736         |             |
| RPS15 40S ribosomal protein S15                                                              | IPI00216153        | 0                          | 10            | 0             | 0                          | 0            | 0            | 8.021            | 2.481         |             |
| RPS15A 40S ribosomal protein S15a                                                            | IPI00221091        | 0                          | 0             | 4             | 0                          | 0            | 0            | 2.743            | 2.211         |             |
| RPS16 40S ribosomal protein S16                                                              | IPI00221092        | 8                          | 22            | 9             | 7                          | 7            | 0            | 2.1              | 1.058         |             |
| RPS17 40S ribosomal protein S17                                                              | IPI00221093        | 0                          | 0             | 4             | 0                          | 0            | 0            | 2.743            | 2.211         |             |
| RPS18 40S ribosomal protein S18                                                              | IPI00013296        | 18                         | 58            | 27            | 11                         | 9            | 4            | 532.932          | 1.497         | Yes         |

| Identified Proteins (277)                                                            | Accession Number | Unweighted spectrum counts |               |               | Unweighted spectrum counts |              |              | Bays Factor | Fold Change | Significant |
|--------------------------------------------------------------------------------------|------------------|----------------------------|---------------|---------------|----------------------------|--------------|--------------|-------------|-------------|-------------|
|                                                                                      |                  | LX-2 repeat 1              | LX-2 repeat 2 | LX-2 repeat 3 | HFF repeat 1               | HFF repeat 2 | HFF repeat 3 |             |             |             |
| RPS2 40S ribosomal protein S2                                                        | IPI00013485      | 12                         | 0             | 18            | 2                          | 0            | 0            | 463.141     | 2.313       | Yes         |
| RPS23 40S ribosomal protein S23                                                      | IPI00218606      | 0                          | 9             | 9             | 0                          | 0            | 0            | 371.071     | 3.933       | Yes         |
| RPS24 Isoform 1 of 40S ribosomal protein S24                                         | IPI00029750      | 8                          | 13            | 0             | 0                          | 0            | 0            | 689.417     | 3.577       | Yes         |
| RPS25 40S ribosomal protein S25                                                      | IPI00012750      | 8                          | 22            | 7             | 6                          | 6            | 0            | 1.685       | 1.117       |             |
| RPS26;LOC728937;LOC644166 40S ribosomal protein S26                                  | IPI00655650      | 0                          | 14            | 5             | 0                          | 0            | 0            | 148.4       | 3.551       | Yes         |
| RPS27 40S ribosomal protein S27                                                      | IPI00513971      | 0                          | 0             | 4             | 0                          | 0            | 0            | 2.743       | 2.211       |             |
| RPS27A;UBB;UBC ubiquitin and ribosomal protein S27a precursor                        | IPI00179330      | 19                         | 0             | 36            | 37                         | 29           | 0            | 2.946       | -0.17       |             |
| RPS29 40S ribosomal protein S29                                                      | IPI00182289      | 0                          | 9             | 0             | 0                          | 0            | 0            | 5.681       | 2.474       |             |
| RPS3 40S ribosomal protein S3                                                        | IPI00011253      | 26                         | 0             | 21            | 4                          | 3            | 0            | 222.276     | 1.582       | Yes         |
| RPS3A 40S ribosomal protein S3a                                                      | IPI00419880      | 2                          | 0             | 12            | 0                          | 0            | 0            | 23.271      | 3.162       | Yes         |
| RPS4X 40S ribosomal protein S4, X isoform                                            | IPI00217030      | 28                         | 42            | 33            | 6                          | 8            | 0            | 127804.228  | 1.946       | Yes         |
| RPS5 40S ribosomal protein S5                                                        | IPI00008433      | 0                          | 0             | 4             | 0                          | 0            | 0            | 2.743       | 2.211       |             |
| RPS6 40S ribosomal protein S6                                                        | IPI00021840      | 0                          | 0             | 6             | 0                          | 0            | 0            | 5.467       | 2.28        |             |
| RPS7 40S ribosomal protein S7                                                        | IPI00013415      | 8                          | 4             | 8             | 0                          | 0            | 0            | 10.65       | 3.647       | Yes         |
| RPS8 40S ribosomal protein S8                                                        | IPI00216587      | 9                          | 0             | 9             | 0                          | 0            | 0            | 545.997     | 3.415       | Yes         |
| RPS9 40S ribosomal protein S9                                                        | IPI00221088      | 9                          | 4             | 26            | 3                          | 4            | 0            | 7.982       | 1.611       |             |
| RUVBL1 Isoform 1 of RuvB-like 1                                                      | IPI00021187      | 0                          | 0             | 4             | 0                          | 0            | 0            | 2.743       | 2.211       |             |
| SAMM50 Sorting and assembly machinery component 50 homolog                           | IPI00412713      | 7                          | 0             | 7             | 0                          | 0            | 0            | 112.778     | 3.536       | Yes         |
| SERPINE1 Plasminogen activator inhibitor 1 precursor                                 | IPI00007118      | 2                          | 0             | 13            | 0                          | 0            | 0            | 24.031      | 3           | Yes         |
| SERPINF1 Pigment epithelium-derived factor precursor                                 | IPI00006114      | 0                          | 0             | 0             | 0                          | 2            | 1.724        | -1.807      |             |             |
| SERPINH1 Serpin H1 precursor                                                         | IPI00032140      | 2                          | 0             | 4             | 2                          | 0            | 0            | 0.909       | 1.019       |             |
| Serum albumin precursor                                                              | IPI00708398      | 49                         | 228           | 49            | 16                         | 18           | 78           | 55.973      | 1.039       |             |
| SFRS3 Splicing factor, arginine/serine-rich 3                                        | IPI00010204      | 0                          | 4             | 0             | 0                          | 0            | 0            | 3.335       | 2.143       |             |
| SLC25A11 Mitochondrial 2-oxoglutarate/malate carrier protein                         | IPI00219729      | 2                          | 0             | 0             | 0                          | 0            | 0            | 1.777       | 1.711       |             |
| SLC25A13 Mitochondrial aspartate-glutamate carrier protein                           | IPI00007084      | 0                          | 0             | 2             | 0                          | 0            | 0            | 1.842       | 1.687       |             |
| SLC25A3 Isoform A of Phosphate carrier protein, mitochondrial precursor              | IPI00022202      | 0                          | 0             | 16            | 0                          | 0            | 0            | 3.973       | 2.294       |             |
| SLC25A5 ADP/ATP translocase 2                                                        | IPI00007188      | 28                         | 0             | 36            | 0                          | 0            | 0            | 31152.452   | 3.929       | Yes         |
| SLC25A6 ADP/ATP translocase 3                                                        | IPI00291467      | 0                          | 0             | 29            | 0                          | 0            | 0            | 2.938       | 2.524       |             |
| SNRPD3 Small nuclear ribonucleoprotein Sm D3                                         | IPI00017964      | 3                          | 0             | 0             | 0                          | 0            | 0            | 2.118       | 2.018       |             |
| STAU1 Staufen, RNA binding protein, homolog 1                                        | IPI00641873      | 2                          | 0             | 0             | 0                          | 0            | 0            | 1.777       | 1.711       |             |
| STOM Erythrocyte band 7 integral membrane protein                                    | IPI00219682      | 18                         | 0             | 7             | 6                          | 10           | 0            | 0.692       | 0.295       |             |
| STT3A Dolichyl-diphosphooligosaccharide--protein glycosyltransferase subunit STT3A   | IPI00297492      | 0                          | 0             | 7             | 0                          | 0            | 0            | 5.579       | 2.266       |             |
| SURF4 Isoform 1 of Surfteil locus protein 4                                          | IPI00005737      | 2                          | 0             | 13            | 0                          | 0            | 0            | 24.031      | 3           | Yes         |
| TFPI2 Tissue factor pathway inhibitor 2 precursor                                    | IPI00009198      | 0                          | 24            | 5             | 0                          | 0            | 0            | 193.567     | 3.315       | Yes         |
| TGFBI Transforming growth factor-beta-induced protein ig-h3 precursor                | IPI00018219      | 57                         | 140           | 58            | 19                         | 13           | 28           | 28384.003   | 1.392       |             |
| TGM2 Isoform 1 of Protein-glutamine gamma-glutamyltransferase 2 (transglutaminase 2) | IPI00294578      | 14                         | 0             | 12            | 37                         | 16           | 0            | 0.695       | -0.351      |             |
| THBS1 Thrombospondin-1 precursor                                                     | IPI00296099      | 0                          | 0             | 0             | 0                          | 0            | 8            | 8.493       | -2.314      |             |
| THSD4 thrombospondin, type I, domain containing 4                                    | IPI00794391      | 2                          | 0             | 0             | 0                          | 0            | 0            | 1.777       | 1.711       |             |
| THY1 Thy-1 membrane glycoprotein precursor                                           | IPI00022892      | 8                          | 0             | 4             | 7                          | 9            | 0            | 0.244       | -0.282      |             |
| TIMP3 Metalloproteinase inhibitor 3 precursor                                        | IPI00218247      | 0                          | 5             | 0             | 0                          | 0            | 0            | 4.152       | 2.267       |             |
| TINAGL1 Isoform 1 of Tubulointerstitial nephritis antigen-like precursor             | IPI00005563      | 6                          | 0             | 3             | 0                          | 0            | 0            | 17.613      | 2.854       | Yes         |
| TMED10 Transmembrane emp24 domain-containing protein 10 precursor                    | IPI00022805      | 0                          | 0             | 2             | 0                          | 0            | 0            | 1.842       | 1.687       |             |
| TMEM33 Transmembrane protein 33                                                      | IPI00299084      | 0                          | 0             | 2             | 0                          | 0            | 0            | 1.842       | 1.687       |             |
| TMEM43 Transmembrane protein 43                                                      | IPI00301280      | 15                         | 0             | 21            | 6                          | 4            | 0            | 8.486       | 1.115       |             |
| TNC Isoform 1 of Tenascin precursor                                                  | IPI00031008      | 76                         | 295           | 154           | 40                         | 30           | 51           | 63837.88    | 1.325       |             |
| TOMM40 Isoform 1 of Probable mitochondrial import receptor subunit TOM40 homolog     | IPI00014053      | 5                          | 0             | 3             | 0                          | 0            | 0            | 16.121      | 2.909       | Yes         |
| TOP2A DNA topoisomerase 2                                                            | IPI00178667      | 6                          | 0             | 5             | 0                          | 0            | 0            | 33.951      | 2.993       | Yes         |
| TPM1 Isoform 3 of Tropomyosin alpha-1 chain                                          | IPI00216135      | 5                          | 0             | 4             | 7                          | 6            | 0            | 0.666       | -0.369      |             |
| TRIP13 Isoform 1 of Thyroid receptor-interacting protein 13                          | IPI00003505      | 0                          | 0             | 3             | 0                          | 0            | 0            | 2.112       | 2.037       |             |
| Trypsin - Sus scrofa (Pig)                                                           | MAN00000761      | 36                         | 95            | 45            | 55                         | 47           | 42           | 1.046       | 0.161       |             |
| TUBA1B Tubulin alpha-1B chain                                                        | IPI00387144      | 127                        | 0             | 160           | 22                         | 21           | 0            | 9.267       | 0.77        |             |
| TUBB Tubulin beta chain                                                              | IPI00011654      | 166                        | 5             | 202           | 47                         | 36           | 0            | 0.264       | 1.022       |             |
| TUBB2C Tubulin beta-2C chain                                                         | IPI00007752      | 142                        | 0             | 176           | 0                          | 0            | 0            | 19698.074   | 4.202       | Yes         |
| TUBB3 Tubulin beta-3 chain                                                           | IPI00013683      | 101                        | 0             | 126           | 0                          | 0            | 0            | 22426.041   | 4.24        | Yes         |
| TUBB6 46 kDa protein                                                                 | IPI00641706      | 0                          | 0             | 95            | 0                          | 0            | 0            | 48333.947   | 4.255       | Yes         |
| TUBB6 TUBB6 protein                                                                  | IPI00646779      | 75                         | 0             | 89            | 0                          | 0            | 0            | 3.158       | 2.119       |             |
| UPF1 Isoform 1 of Regulator of nonsense transcripts 1                                | IPI00034049      | 2                          | 0             | 2             | 0                          | 0            | 0            | 2.131       | 2.508       |             |
| VDAC1 Voltage-dependent anion-selective channel protein 1                            | IPI00216308      | 38                         | 0             | 27            | 7                          | 6            | 0            | 108.701     | 1.231       |             |
| VDAC2 Voltage-dependent anion-selective channel protein 2                            | IPI00024145      | 16                         | 0             | 15            | 7                          | 8            | 0            | 6.454       | 0.601       |             |
| VDAC3 Isoform 1 of Voltage-dependent anion-selective channel protein 3               | IPI00031804      | 14                         | 0             | 13            | 7                          | 6            | 0            | 4.531       | 0.639       |             |
| VIM Vimentin                                                                         | IPI00418471      | 97                         | 0             | 124           | 75                         | 52           | 6            | 0.014       | -0.461      |             |
| VITN Vitronectin precursor                                                           | IPI00298971      | 0                          | 0             | 0             | 6                          | 0            | 0            | 2.226       | -2.388      |             |
| WNT5A Protein Wnt-5a precursor                                                       | IPI00013178      | 0                          | 9             | 2             | 0                          | 0            | 0            | 14.816      | 3.215       | Yes         |
| XRCC5 ATP-dependent DNA helicase 2 subunit 2                                         | IPI00220834      | 0                          | 0             | 2             | 0                          | 0            | 0            | 1.842       | 1.687       |             |
| YWHAE 14-3-3 protein epsilon                                                         | IPI0000816       | 7                          | 0             | 5             | 0                          | 0            | 0            | 51.992      | 3.134       | Yes         |
| YWHAZ 14-3-3 protein zeta/delta                                                      | IPI00021263      | 6                          | 0             | 5             | 0                          | 0            | 0            | 33.951      | 2.993       | Yes         |
